# Supplementary material for: Gut Microbiome Variation Modulates the Effects of Dietary Fiber on Host Metabolism
Source: Research Square preprint supplement (doi:10.21203/rs.3.rs-97357/v1), 2020-10-28
Supplement: Supplementary file 1 [file b0ef9577f673ca585ba6db7b.xlsx]

## Sheet: T9_SupplementalTable9-GeneWGCNA
Table S9. List of genes cluster in modules by WGCNA.
moduleColor	GENE	EntrezId	Symbol	GeneName	GS.GDAT_BW	p.GS.GDAT_BW	GS.TG_nmol_gWW	p.GS.TG_nmol_gWW	GS.TG_nmol_gWW.1	p.GS.glucose_norm	MM.blue	p.MM.blue	MM.brown	p.MM.brown	MM.cyan	p.MM.cyan	MM.yellow	p.MM.yellow	MM.tan	p.MM.tan	MM.magenta	p.MM.magenta	MM.green	p.MM.green	MM.red	p.MM.red	MM.greenyellow	p.MM.greenyellow	MM.purple	p.MM.purple	MM.pink	p.MM.pink	MM.salmon	p.MM.salmon	MM.turquoise	p.MM.turquoise	MM.black	p.MM.black
black	ENSMUSG00000096954	NA	NA	NA	0.0288869	0.865233	-0.139584	0.409961	-0.070635	0.677828	0.124342	0.463414	0.0969039	0.5683	-0.178021	0.291817	-0.103187	0.543357	-0.153057	0.365783	-0.466489	0.00361082	-0.174434	0.301808	0.525839	0.000830429	0.412967	0.0110764	0.136561	0.420274	0.120724	0.476623	-0.136106	0.421841	-0.449012	0.00530924	0.784378	9.24e-09
black	ENSMUSG00000109279	NA	NA	NA	-0.0713202	0.674874	-0.176867	0.295008	-0.0784992	0.644213	0.0513265	0.762888	0.127054	0.453643	-0.0550027	0.746445	-0.0611199	0.719331	0.00180352	0.991547	-0.282647	0.0900713	-0.0884653	0.602599	0.266071	0.111443	-0.0171151	0.919915	0.064282	0.705443	-0.144902	0.392172	-0.221312	0.188048	-0.187716	0.265894	0.677892	4.04e-06
black	ENSMUSG00000103133	NA	NA	NA	0.0430742	0.800164	-0.107455	0.526718	-0.0325844	0.848172	-0.14166	0.402963	0.147786	0.382719	-0.0310517	0.855237	-0.102322	0.546758	0.142188	0.401196	0.0255475	0.880694	0.131399	0.438219	0.155672	0.35755	0.114388	0.500227	0.0454464	0.7894	0.0542798	0.74967	0.0178646	0.916419	0.0746398	0.660628	0.684385	3e-06
black	ENSMUSG00000086231	NA	NA	NA	-0.124489	0.462881	-0.110498	0.515007	0.00970139	0.954555	0.0385256	0.820904	0.0862379	0.611799	-0.360117	0.0285703	-0.229445	0.17192	-0.0163422	0.923521	-0.336553	0.0416747	0.0138283	0.935258	0.561857	0.00029618	0.335874	0.0421142	0.0953403	0.574587	0.15624	0.355777	0.0536148	0.75264	-0.325126	0.0495887	0.75593	6.31e-08
black	ENSMUSG00000111618	NA	NA	NA	0.255188	0.127425	0.107719	0.525697	0.0183543	0.914137	0.0685314	0.686929	-0.0405208	0.811791	0.130373	0.441835	0.0763719	0.653241	-0.0941683	0.57932	-0.168822	0.317867	0.0998936	0.556366	0.0279333	0.869643	-0.108756	0.521694	0.10355	0.541932	0.0945599	0.577737	0.128779	0.447485	-0.23691	0.15801	0.636526	2.29e-05
black	ENSMUSG00000089827	NA	NA	NA	-0.068573	0.686748	0.131378	0.438293	-0.137718	0.416312	0.0243434	0.886279	0.0341568	0.840937	-0.0655308	0.699984	0.0960015	0.571924	-0.0101123	0.952633	-0.170526	0.312934	-0.0335572	0.843694	-0.0428226	0.801308	-0.326096	0.0488727	0.201082	0.232716	0.0189968	0.911143	-0.00582265	0.972716	-0.00580025	0.972821	0.547071	0.00045865
black	ENSMUSG00000117494	NA	NA	NA	0.0635258	0.708756	0.0337782	0.842678	0.031454	0.853381	0.0299356	0.860388	0.00598011	0.971978	-0.0471233	0.781815	0.0311363	0.854846	-0.0942403	0.579029	-0.279332	0.0940704	-0.0129587	0.939322	0.291292	0.0802555	0.27598	0.0982515	0.246447	0.14145	0.16255	0.336436	-0.00267866	0.987446	-0.172122	0.30836	0.817769	6.48e-10
black	ENSMUSG00000098889	NA	NA	NA	0.00765045	0.964156	-0.0934816	0.582102	-0.198893	0.237949	-0.040267	0.812949	0.148202	0.381366	0.112963	0.505617	0.14263	0.399717	-0.182401	0.279912	-0.0835485	0.622985	-0.106402	0.5308	0.0648389	0.703007	0.405141	0.0128648	0.233736	0.163821	0.000716298	0.996643	-0.229424	0.171959	-0.0739462	0.663595	0.772779	2.09e-08
black	ENSMUSG00000110411	NA	NA	NA	-0.175356	0.299219	-0.132834	0.433189	-0.100574	0.553668	-0.162289	0.337225	0.272071	0.103306	-0.049853	0.769508	0.0241577	0.887141	-0.128186	0.449596	0.00497531	0.976685	0.201158	0.232537	0.0993806	0.558405	0.222835	0.184949	0.143026	0.398396	0.128404	0.448819	-0.0115336	0.945984	-0.230243	0.170391	0.68174	3.39e-06
black	ENSMUSG00000096991	NA	NA	NA	-0.131156	0.439072	-0.211227	0.209493	-0.0272339	0.87288	0.0627139	0.712319	0.217632	0.195685	-0.297966	0.0732637	-0.156223	0.35583	-0.0283609	0.867665	-0.368166	0.0249611	-0.0646786	0.703708	0.377525	0.0212473	0.0636762	0.708097	0.184557	0.274168	0.131269	0.438676	-0.0106414	0.950157	-0.333249	0.0438496	0.677717	4.07e-06
black	ENSMUSG00000108476	NA	NA	NA	-0.0230691	0.892196	0.0418984	0.805513	-0.112054	0.509069	-0.0222534	0.895987	0.0131905	0.938239	0.136858	0.419257	0.260273	0.119758	-0.139179	0.411336	-0.134545	0.427233	0.050124	0.76829	-0.19759	0.241101	-0.258577	0.122275	0.146335	0.387459	-0.11978	0.480104	0.0114043	0.946589	-0.109049	0.520567	0.677757	4.06e-06
black	ENSMUSG00000097536	NA	NA	NA	0.0370458	0.827677	-0.0787299	0.643236	-0.040228	0.813127	0.121573	0.473508	0.0813694	0.632111	-0.090773	0.593131	-0.0231814	0.891675	-0.0331354	0.845636	-0.309739	0.0621007	-0.180058	0.28624	0.339583	0.0397579	0.249606	0.136256	0.301812	0.0694572	0.185702	0.271152	-0.214734	0.201852	-0.123245	0.467401	0.819081	5.77e-10
black	ENSMUSG00000105742	NA	NA	NA	0.0448561	0.792075	-0.127173	0.453215	0.0416733	0.806538	0.190993	0.257485	0.0179311	0.91611	-0.132825	0.43322	0.0349436	0.837321	-0.151968	0.369245	-0.390633	0.0168293	-0.0295401	0.862215	0.268975	0.107445	0.152965	0.366074	0.272874	0.102251	0.222821	0.184977	0.0963058	0.570701	-0.25562	0.12676	0.839299	8.61e-11
black	ENSMUSG00000110504	NA	NA	NA	-0.163034	0.33498	-0.0711407	0.675647	-0.198645	0.238545	-0.133972	0.429222	0.126136	0.456938	-0.201429	0.231895	-0.173379	0.304785	0.155856	0.356976	-0.0920567	0.587892	0.0926336	0.585545	0.282016	0.0908223	-0.00353614	0.983428	0.117662	0.487958	0.0845895	0.618645	-0.0333795	0.844512	-0.230666	0.169586	0.519376	0.000987415
black	ENSMUSG00000102602	NA	NA	NA	0.0672494	0.692496	-0.0688392	0.685594	0.208436	0.215714	0.0653588	0.700735	0.105369	0.53482	-0.065522	0.700023	0.0928074	0.584839	-0.167437	0.321912	-0.33427	0.0431681	-0.147153	0.384781	0.130072	0.442897	-0.0328505	0.846947	0.225277	0.180056	0.145574	0.389959	-0.120491	0.477482	-0.171104	0.311273	0.772737	2.1e-08
black	ENSMUSG00000108551	NA	NA	NA	-0.0450388	0.791247	-0.104277	0.539081	-0.0945688	0.577701	0.0390287	0.818604	0.145319	0.3908	-0.0854049	0.615255	-0.00797484	0.962637	0.0300993	0.859632	-0.163079	0.334844	0.0295355	0.862236	0.151043	0.3722	0.0628421	0.711756	0.336233	0.0418816	0.265993	0.111552	-0.0188721	0.911724	-0.0099897	0.953206	0.82382	3.78e-10
black	ENSMUSG00000116437	NA	NA	NA	0.143822	0.395751	0.00941359	0.955902	-0.108925	0.521043	0.273961	0.100837	-0.016411	0.923199	0.129358	0.445426	0.228854	0.173057	-0.0987576	0.560886	-0.280583	0.0925452	-0.100835	0.552633	-0.0341495	0.84097	-0.239248	0.153825	0.270798	0.104993	0.158169	0.349796	0.0162994	0.92372	0.0750977	0.658672	0.462903	0.00391441
black	ENSMUSG00000056162	338403	Cndp1	carnosine dipeptidase 1 (metallopeptidase M20 family)	0.29582	0.0754581	0.187609	0.266171	0.228759	0.173241	0.0967875	0.568767	0.112454	0.507547	0.326116	0.0488587	0.0787055	0.643339	-0.0195377	0.908623	0.0260935	0.878163	0.0649761	0.702407	0.0108588	0.94914	0.147302	0.384295	0.0218523	0.897852	0.156308	0.355565	0.064602	0.704043	0.157037	0.353299	0.513547	0.00115094
black	ENSMUSG00000117513	NA	NA	NA	0.242763	0.147688	0.132576	0.434091	-0.0464346	0.784927	0.106066	0.532106	0.0518872	0.760374	0.217806	0.19532	0.142684	0.399539	-0.207662	0.217463	0.00593939	0.972169	0.0153591	0.928109	-0.0806535	0.635121	0.32602	0.0489284	-0.0806453	0.635155	-0.153258	0.365146	0.123845	0.465217	-0.0431641	0.799756	0.475108	0.00296344
black	ENSMUSG00000089842	NA	NA	NA	-0.0330493	0.846032	-0.0724286	0.670104	-0.0423236	0.803578	-0.0601647	0.723543	0.0699606	0.680741	-0.173225	0.305223	-0.0869505	0.608849	0.177779	0.292484	-0.123103	0.467916	-0.188113	0.264867	0.165967	0.326237	-0.145148	0.391362	0.308435	0.0632663	0.169979	0.314512	-0.314099	0.0583255	0.0541853	0.750092	0.64464	1.66e-05
black	ENSMUSG00000097443	NA	NA	NA	-0.0687732	0.68588	-0.0679094	0.689628	-0.210183	0.211805	-0.0113397	0.946891	0.118312	0.485542	0.188482	0.263913	0.166521	0.324604	-0.0266339	0.875659	-0.0822172	0.628554	-0.192215	0.254397	-0.0507723	0.765376	-0.103586	0.541791	0.341644	0.0384947	0.108212	0.523792	-0.329343	0.0465386	0.024882	0.88378	0.521133	0.000942329
black	ENSMUSG00000104344	NA	NA	NA	-0.0711667	0.675535	-0.124251	0.463744	0.0239683	0.888021	-0.0556756	0.743447	0.203516	0.226992	-0.299544	0.0716828	-0.284367	0.0880477	0.171795	0.309295	-0.281563	0.091364	0.0693137	0.683539	0.477687	0.00279059	-0.00170305	0.992018	0.207972	0.216762	0.187182	0.26728	0.0325976	0.848112	-0.256139	0.125965	0.765567	3.39e-08
black	ENSMUSG00000113853	NA	NA	NA	-0.224041	0.18252	-0.197349	0.241686	-0.123095	0.467946	-0.199423	0.236675	0.273669	0.101216	-0.1286	0.44812	-0.242244	0.148582	0.117649	0.488007	0.0234256	0.89054	0.253421	0.130172	0.338288	0.0405678	0.187154	0.267355	0.0802462	0.636835	0.0963747	0.570424	0.252236	0.132041	-0.18513	0.272657	0.43662	0.00689686
black	ENSMUSG00000107320	NA	NA	NA	-0.267476	0.109495	-0.211672	0.208513	-0.115052	0.497728	-0.180281	0.285633	0.245347	0.143292	-0.356304	0.0304242	-0.228079	0.174557	0.123926	0.464922	-0.112213	0.508464	-0.0673573	0.692026	0.359289	0.0289646	0.0448451	0.792125	0.39869	0.0145173	0.286246	0.0858788	-0.167115	0.322857	-0.206854	0.219299	0.775062	1.79e-08
black	ENSMUSG00000097816	NA	NA	NA	-0.165832	0.326639	-0.139619	0.409843	-0.196513	0.243727	-0.111834	0.509907	0.174485	0.301665	0.035095	0.836626	-0.0944134	0.578329	0.135499	0.423933	0.00743356	0.965171	-0.122434	0.470357	0.166159	0.32567	0.0776522	0.647801	0.141952	0.401984	0.12343	0.466726	-0.157518	0.351808	-0.0860815	0.612447	0.514522	0.00112203
black	ENSMUSG00000045350	72277	Fam186a	family with sequence similarity 186, member A	0.105155	0.535654	-0.0211011	0.901346	-0.347141	0.0352859	0.0912909	0.591015	0.131006	0.439602	0.326126	0.0488507	0.308147	0.0635263	-0.253535	0.129994	-0.0452751	0.790176	-0.0106168	0.950273	-0.270851	0.104923	-0.00503177	0.976421	0.180873	0.28403	-0.128565	0.448245	-0.082535	0.627223	-0.0192601	0.909917	0.607375	6.71e-05
black	ENSMUSG00000105597	NA	NA	NA	0.329968	0.0460993	0.27801	0.0957031	0.0735248	0.6654	0.274653	0.0999458	-0.210898	0.210219	0.292952	0.0784706	0.311739	0.0603454	-0.312223	0.0599269	-0.270239	0.10574	-0.321211	0.0525615	0.0217685	0.898242	0.280359	0.092817	0.372381	0.0232271	0.400103	0.014141	-0.187693	0.265955	-0.0971017	0.567506	0.512084	0.00119557
black	ENSMUSG00000090105	NA	NA	NA	0.0886236	0.601947	0.0320849	0.850473	0.110152	0.51633	0.344866	0.0365868	-0.0269591	0.874153	-0.156168	0.356002	-0.0648589	0.70292	-0.0617756	0.716444	-0.566453	0.000257443	-0.19609	0.244762	0.450654	0.00512474	-0.009626	0.954908	0.345079	0.0364634	0.33292	0.044071	0.0225113	0.894788	-0.278502	0.0950933	0.636405	2.3e-05
black	ENSMUSG00000113789	NA	NA	NA	-0.100978	0.552067	-0.106057	0.532141	0.118579	0.484549	-0.121318	0.474441	0.134188	0.428473	-0.00738219	0.965412	-0.0540732	0.750593	0.062273	0.714256	0.245677	0.142737	0.0380796	0.822944	-0.206036	0.221167	-0.366711	0.025584	-0.0455507	0.788928	0.0410969	0.809164	-0.158876	0.347618	0.074215	0.662445	-0.43622	0.00695419
black	ENSMUSG00000102982	NA	NA	NA	-0.154562	0.361032	-0.162707	0.335963	-0.187362	0.266813	0.00184737	0.991342	0.148622	0.380002	-0.188182	0.264688	-0.180117	0.28608	0.0981605	0.563269	-0.286999	0.0850205	-0.106781	0.529327	0.425276	0.00869152	0.0387142	0.820041	0.414672	0.010716	0.225068	0.180472	-0.18272	0.279056	-0.24978	0.135974	0.813027	9.75e-10
black	ENSMUSG00000107215	NA	NA	NA	-0.0637106	0.707946	-0.0403546	0.812549	-0.0699046	0.680983	-0.0154748	0.927569	0.152355	0.368013	0.011358	0.946805	-0.155956	0.356663	0.215682	0.199819	-0.0481737	0.777072	0.0525101	0.757583	0.29429	0.077054	0.0874205	0.606907	0.104454	0.53839	0.188145	0.264784	0.0639224	0.707018	0.0486307	0.775012	0.508543	0.00130992
black	ENSMUSG00000084452	NA	NA	NA	0.146905	0.385593	0.0489689	0.773488	0.00438686	0.979442	0.18673	0.268458	-0.0704441	0.678652	0.0682302	0.688235	0.160425	0.342875	-0.155344	0.358577	-0.393923	0.0158504	-0.230003	0.17085	0.247622	0.139501	0.216547	0.197978	0.314069	0.0583511	0.223962	0.18268	-0.0940807	0.579675	-0.116625	0.491829	0.827762	2.63e-10
black	ENSMUSG00000094410	NA	NA	NA	-0.113554	0.503377	-0.147997	0.38203	-0.0215475	0.89927	-0.0447839	0.792403	0.178568	0.290313	-0.2707	0.105124	-0.0278603	0.869981	-0.129797	0.443872	-0.315446	0.0571968	-0.115845	0.494748	0.20705	0.218852	-0.0317215	0.852148	0.365606	0.0260655	0.125845	0.457984	-0.14081	0.405822	-0.354722	0.0312218	0.880994	6.35e-13
black	ENSMUSG00000110397	NA	NA	NA	0.171219	0.310943	0.0212089	0.900845	0.133804	0.429807	0.301375	0.0698812	-0.148446	0.380573	-0.00111156	0.99479	0.105742	0.533366	-0.157778	0.351003	-0.407762	0.0122404	0.186663	0.268634	0.234401	0.16259	0.172963	0.305965	0.0704091	0.678803	0.1227	0.469386	0.250242	0.135228	-0.15782	0.350873	0.640709	1.94e-05
black	ENSMUSG00000117333	NA	NA	NA	-0.215663	0.199859	-0.175064	0.300037	0.0194182	0.90918	-0.244695	0.144391	0.310868	0.061105	-0.0905923	0.59387	-0.151097	0.372028	0.0947856	0.576825	0.00724325	0.966062	0.167808	0.320826	0.121798	0.472684	-0.0359108	0.832882	0.187917	0.265374	0.0921726	0.587421	0.00612781	0.971286	-0.17039	0.313325	0.634098	2.51e-05
black	ENSMUSG00000079065	100042165	BC005561	cDNA sequence BC005561	-0.108084	0.524286	-0.283123	0.0895075	-0.0679266	0.689553	-0.0902851	0.595127	0.402905	0.0134186	-0.224354	0.181895	-0.189683	0.260825	-0.0183039	0.914372	-0.168926	0.317563	-0.0177308	0.917043	0.321727	0.0521619	0.253118	0.130649	0.1182	0.485957	0.0424697	0.802913	-0.244164	0.145292	-0.239193	0.153924	0.885169	3.52e-13
black	ENSMUSG00000106904	NA	NA	NA	-0.0332186	0.845252	-0.208418	0.215756	-0.0511924	0.76349	0.100752	0.552963	0.0417127	0.806358	-0.0790907	0.641711	0.148659	0.379881	-0.277351	0.0965249	-0.31932	0.0540477	-0.0114604	0.946327	0.0991739	0.559228	0.164609	0.330269	0.192784	0.252967	-0.0854128	0.615222	-0.16024	0.34344	-0.237391	0.157142	0.775673	1.71e-08
black	ENSMUSG00000105572	NA	NA	NA	0.0975702	0.56563	0.00737717	0.965435	0.101626	0.549503	0.155586	0.357819	0.0786072	0.643756	-0.0619824	0.715534	0.188978	0.262635	-0.265797	0.111826	-0.268157	0.108561	-0.128283	0.449248	-0.0970921	0.567545	0.0347727	0.838107	0.169926	0.314665	0.0826859	0.626591	-0.104643	0.537651	-0.110167	0.516274	0.655607	1.06e-05
black	ENSMUSG00000108465	NA	NA	NA	-0.118339	0.485441	-0.162025	0.33802	-0.0937375	0.581065	-0.0438712	0.796543	0.291218	0.0803361	-0.0982337	0.562977	-0.150352	0.374417	0.0949538	0.576146	-0.20914	0.214134	-0.0831402	0.624691	0.311326	0.0607048	0.111579	0.510876	0.0428874	0.801014	0.00610557	0.971391	-0.150048	0.375396	-0.148682	0.379805	0.660209	8.75e-06
black	ENSMUSG00000097145	414108	9230114K14Rik	RIKEN cDNA 9230114K14 gene	-0.200874	0.23321	-0.153084	0.365698	-0.116396	0.492685	-0.331063	0.0453385	0.39555	0.0153844	0.0474571	0.780307	-0.0803895	0.636232	0.0551603	0.745743	0.232736	0.165683	0.375394	0.0220497	0.0391971	0.817834	0.179802	0.286939	-0.00275665	0.987081	-0.0272729	0.8727	0.128679	0.447838	-0.0180039	0.91577	0.575948	0.000191455
black	ENSMUSG00000108573	NA	NA	NA	0.158698	0.348167	-0.0466438	0.783982	0.00879976	0.958775	0.312656	0.0595545	-0.0220366	0.896995	-0.169834	0.314933	-0.104615	0.537761	-0.0380562	0.823051	-0.417005	0.0102392	-0.117887	0.487121	0.509065	0.00129248	0.340142	0.039412	0.224177	0.182249	0.379188	0.0206385	0.0622339	0.714428	-0.12896	0.44684	0.640383	1.97e-05
black	ENSMUSG00000068130	668923	Zfp442	zinc finger protein 442	-0.0866419	0.610126	-0.146195	0.387916	0.113804	0.502434	-0.0310582	0.855207	0.181827	0.281454	-0.0832839	0.62409	-0.116247	0.493242	0.00319124	0.985044	-0.131636	0.437386	0.134676	0.42678	0.250356	0.135044	0.202413	0.229575	-0.0906942	0.593453	-0.045285	0.790132	0.069543	0.682546	-0.143869	0.395595	0.648202	1.44e-05
black	ENSMUSG00000029638	170772	Glcci1	glucocorticoid induced transcript 1	-0.0462717	0.785664	-0.0489288	0.773669	-0.106146	0.531792	-0.0818854	0.629945	0.185282	0.272256	-0.0826123	0.626899	-0.134631	0.426934	0.00747781	0.964964	-0.120102	0.478917	0.0147294	0.931049	0.23331	0.164613	0.0635718	0.708554	0.198569	0.23873	0.205496	0.222408	-0.0525987	0.757186	-0.345401	0.0362772	0.79335	4.75e-09
black	ENSMUSG00000085599	NA	NA	NA	-0.0835158	0.623122	-0.183879	0.275967	-0.0720261	0.671835	-0.108304	0.523436	0.237523	0.156904	-0.00152193	0.992867	0.0758295	0.655551	-0.0233455	0.890913	0.0943445	0.578608	0.0625262	0.713143	-0.154007	0.362781	-0.10525	0.535282	0.146205	0.387884	0.0437128	0.797263	-0.18094	0.283848	0.0992781	0.558813	0.552514	0.00039137
black	ENSMUSG00000090207	NA	NA	NA	0.0644765	0.704592	-0.302859	0.0684479	-0.22623	0.178172	0.142279	0.400892	0.167715	0.321095	-0.167772	0.320929	-0.250634	0.134596	0.125192	0.46034	-0.219441	0.191904	-0.271776	0.103694	0.364858	0.0263958	0.0187584	0.912254	0.143942	0.39535	0.205603	0.222161	-0.274969	0.0995406	-0.178556	0.290346	0.391968	0.016426
black	ENSMUSG00000090582	NA	NA	NA	-0.0229359	0.892815	-0.115412	0.496375	-0.0620297	0.715326	-0.00582451	0.972707	0.207469	0.217901	-0.212627	0.20642	-0.246446	0.14145	0.0599866	0.724329	-0.205854	0.221584	0.0110005	0.948478	0.451889	0.00498959	0.265125	0.112769	0.103358	0.542687	0.145866	0.388997	0.0112949	0.9471	-0.273445	0.101506	0.637573	2.19e-05
black	ENSMUSG00000086502	NA	NA	NA	-0.152697	0.366926	-0.127252	0.452933	-0.146221	0.387833	-0.0171795	0.919615	0.136291	0.421202	-0.312458	0.0597243	-0.172124	0.308355	-0.0161626	0.924359	-0.289422	0.0823051	-0.129172	0.446088	0.360434	0.0284202	0.0356538	0.834061	0.317089	0.0558444	0.15234	0.368059	-0.221112	0.188458	-0.398309	0.0146203	0.810037	1.25e-09
black	ENSMUSG00000048732	217194	Klhl11	kelch-like 11	-0.190162	0.2596	-0.238882	0.154475	-0.0653449	0.700796	-0.271871	0.103569	0.461347	0.00405293	-0.244462	0.144786	-0.343426	0.0374297	0.22618	0.178271	-0.0180722	0.915452	0.0511314	0.763764	0.346857	0.0354463	0.0189099	0.911548	0.157075	0.353181	0.0771968	0.649734	-0.149278	0.377877	-0.177346	0.29368	0.789955	6.13e-09
black	ENSMUSG00000108206	NA	NA	NA	0.249344	0.136681	0.178616	0.290182	-0.00920427	0.956882	0.0783045	0.645037	-0.176901	0.294913	0.382919	0.0193246	0.119071	0.482727	-0.0633729	0.709426	0.139483	0.410306	-0.0672913	0.692314	-0.0584365	0.731185	0.244755	0.14429	-0.131956	0.43626	0.116295	0.493061	0.0504493	0.766827	0.0964187	0.570247	-0.443909	0.00592007
black	ENSMUSG00000106251	NA	NA	NA	0.000589097	0.997239	0.0823411	0.628035	0.0455575	0.788897	0.0284348	0.867323	0.208027	0.216637	-0.125958	0.457578	-0.232293	0.166513	0.0636552	0.708189	-0.167264	0.322419	-0.189238	0.261967	0.323669	0.0506785	0.036036	0.832307	0.260154	0.119933	0.122194	0.471236	-0.273759	0.101099	-0.223583	0.183441	0.581436	0.000160657
black	ENSMUSG00000097380	NA	NA	NA	0.0976432	0.565338	0.022737	0.89374	0.138674	0.41305	0.0134429	0.937059	0.0601492	0.723612	0.0238393	0.888619	-0.048019	0.77777	-0.105355	0.534874	-0.254503	0.128485	-0.120283	0.478248	0.281469	0.0914766	0.19088	0.257773	0.221495	0.187673	0.260575	0.119314	-0.0757559	0.655864	-0.389326	0.017232	0.746119	1.15e-07
black	ENSMUSG00000084946	NA	NA	NA	-0.0527356	0.756573	0.094588	0.577623	-0.159355	0.346147	-0.0908868	0.592666	-0.0212943	0.900447	-0.116783	0.491237	0.0856104	0.614401	-0.0331262	0.845678	-0.0847876	0.617821	-0.17093	0.311771	-0.0734441	0.665746	-0.2612	0.118399	0.394215	0.0157657	0.0636593	0.708171	-0.288676	0.0831339	-0.133763	0.429947	0.616473	4.85e-05
black	ENSMUSG00000027171	228413	Prrg4	proline rich Gla (G-carboxyglutamic acid) 4 (transmembrane)	0.0175046	0.918098	0.0537488	0.752042	0.0950296	0.57584	-0.0081903	0.961628	0.14154	0.403369	0.0664725	0.695877	0.002209	0.989647	-0.0977206	0.565028	0.0453665	0.789762	-0.0822947	0.628229	0.0975231	0.565818	0.29161	0.0799116	0.265559	0.112159	0.407086	0.012399	-0.03468	0.838533	-0.0428043	0.801391	0.450995	0.00508713
black	ENSMUSG00000090369	66765	4933411K16Rik	RIKEN cDNA 4933411K16 gene	0.161819	0.338643	0.0419176	0.805426	-0.0365701	0.829858	0.179667	0.287307	-0.0474825	0.780192	0.103741	0.541184	0.355838	0.0306575	-0.324353	0.0501643	-0.293701	0.0776745	-0.0908881	0.59266	-0.176341	0.296469	-0.061702	0.716767	0.271737	0.103746	-0.0183308	0.914246	-0.0221469	0.896482	-0.0534216	0.753504	0.817037	6.9e-10
black	ENSMUSG00000085875	NA	NA	NA	0.0865346	0.61057	0.239228	0.153861	0.193252	0.251794	0.139132	0.411497	-0.114961	0.498068	0.0592553	0.727561	0.150226	0.374823	-0.152563	0.367351	-0.181409	0.28258	-0.0307398	0.856675	0.0473286	0.780887	0.0864806	0.610794	0.334781	0.04283	0.305119	0.0663092	0.0773961	0.648888	-0.136438	0.420698	0.573895	0.000204269
black	ENSMUSG00000097337	NA	NA	NA	-0.0193186	0.909644	-0.0727534	0.668709	0.11574	0.495141	-0.140157	0.408025	-0.0517422	0.761024	-0.000909757	0.995736	-0.0552737	0.745237	0.23065	0.169617	0.21467	0.20199	0.24405	0.145487	-0.146312	0.387532	-0.248327	0.138341	-0.333922	0.0433994	0.0593542	0.727124	0.239114	0.154064	0.179841	0.286831	-0.525181	0.000845332
black	ENSMUSG00000021804	57811	Rgr	retinal G protein coupled receptor	0.120129	0.478817	-0.137529	0.416958	-0.0105114	0.950766	0.327046	0.0481802	0.0514849	0.762177	-0.0281845	0.868481	0.16702	0.323134	-0.335053	0.042651	-0.343937	0.0371285	-0.274997	0.0995048	0.0757791	0.655765	0.183537	0.276876	0.181069	0.283499	0.0778634	0.646906	-0.296676	0.074577	-0.153482	0.364437	0.647578	1.48e-05
black	ENSMUSG00000079645	NA	NA	NA	-0.0516855	0.761278	-0.106777	0.529343	-0.0434938	0.798258	0.00349404	0.983625	0.112324	0.508041	-0.0823708	0.62791	0.0847461	0.617994	-0.207445	0.217955	-0.287609	0.0843306	-0.0767318	0.65171	0.0717825	0.672883	0.0814553	0.63175	0.166482	0.324719	-0.13119	0.438954	-0.195922	0.245175	-0.284713	0.0876452	0.798505	3.19e-09
black	ENSMUSG00000103388	NA	NA	NA	-0.177158	0.294203	-0.212669	0.206326	-0.168175	0.319751	-0.159856	0.344615	0.274702	0.0998822	-0.0816682	0.630856	-0.0399322	0.814477	-0.0234503	0.890426	0.0604869	0.722121	0.005312	0.975108	0.0548232	0.747246	0.321894	0.0520328	0.0430948	0.800071	-0.0836475	0.622572	-0.0415469	0.807114	-0.0886149	0.601983	0.610395	6.03e-05
black	ENSMUSG00000104245	NA	NA	NA	-0.241689	0.149545	-0.368074	0.0249999	-0.183981	0.275694	-0.117347	0.489132	0.478962	0.00270841	-0.315764	0.0569334	-0.305227	0.066208	0.132996	0.432623	-0.181666	0.281888	0.0599329	0.724567	0.427784	0.00826379	0.124978	0.461114	0.157487	0.351904	0.0808871	0.634138	-0.0932943	0.582861	-0.236101	0.159476	0.829798	2.17e-10
black	ENSMUSG00000095386	NA	NA	NA	-0.0571018	0.737105	-0.155011	0.359622	0.0405443	0.811684	-0.0489168	0.773723	0.192197	0.254441	-0.0952178	0.575081	0.0463128	0.785478	-0.235885	0.15987	-0.200473	0.234164	0.0549495	0.746682	0.168314	0.319347	0.351003	0.033165	0.102253	0.54703	-0.0510078	0.764319	-0.0695039	0.682716	-0.23365	0.163981	0.646746	1.53e-05
black	ENSMUSG00000086430	NA	NA	NA	0.0804046	0.636168	0.0633382	0.709578	0.108385	0.523123	0.240378	0.151833	-0.173498	0.30445	0.129767	0.443977	0.379822	0.0204102	-0.431262	0.00770025	-0.206382	0.220375	-0.00710186	0.966725	-0.142401	0.400484	0.224208	0.182187	0.0650573	0.702053	-0.118337	0.485447	0.066583	0.695396	-0.125674	0.458601	0.493122	0.00192837
black	ENSMUSG00000117219	NA	NA	NA	0.0222553	0.895978	-0.0652651	0.701144	0.0496743	0.770312	0.0218911	0.897672	0.124863	0.461527	-0.121637	0.473274	-0.0889878	0.600449	-0.0848601	0.617519	-0.292416	0.079044	0.0939289	0.580289	0.325328	0.0494383	0.123623	0.466025	0.207283	0.218323	0.217316	0.196351	0.0187513	0.912287	-0.385066	0.018601	0.797991	3.32e-09
black	ENSMUSG00000073016	331487	Uprt	uracil phosphoribosyltransferase	-0.0948738	0.576469	-0.0123162	0.942325	-0.0273006	0.872571	-0.00510452	0.97608	0.0956628	0.573288	-0.191795	0.255456	-0.00375548	0.9824	-0.106369	0.530925	-0.259608	0.12074	-0.121803	0.472665	0.197196	0.242057	-0.00832569	0.960994	0.401925	0.0136677	0.116934	0.490675	-0.185326	0.272141	-0.261074	0.118582	0.857413	1.24e-11
black	ENSMUSG00000090942	240328	F830016B08Rik	RIKEN cDNA F830016B08 gene	-0.161073	0.340906	-0.240587	0.151466	-0.0850729	0.616634	-0.0173496	0.918821	0.244192	0.145245	-0.340359	0.0392783	-0.201782	0.231061	0.0327094	0.847597	-0.286336	0.0857755	-0.00447893	0.979011	0.439631	0.00647773	0.135034	0.425539	0.240456	0.151696	0.146126	0.388144	-0.0864405	0.61096	-0.272152	0.103198	0.886217	3.02e-13
black	ENSMUSG00000107749	NA	NA	NA	0.135673	0.423331	0.0873624	0.607147	-0.100914	0.552321	0.218855	0.193123	-0.0396191	0.815906	0.110625	0.514521	0.167744	0.321011	-0.194424	0.248874	-0.194942	0.247591	-0.134902	0.425997	0.0316534	0.852462	0.142326	0.400735	0.334267	0.0431698	0.244223	0.145192	-0.138785	0.412674	-0.0694622	0.682896	0.702086	1.28e-06
black	ENSMUSG00000052496	18766	Pkdrej	polycystin (PKD) family receptor for egg jelly	0.216495	0.198089	0.0799313	0.638163	0.0854329	0.615138	0.120412	0.477775	-0.0682517	0.688142	0.299398	0.0718277	0.489825	0.00208977	-0.293226	0.078179	-0.0897586	0.597285	-0.122589	0.469792	-0.520675	0.000953894	-0.312003	0.0601174	0.159341	0.34619	-0.165429	0.327831	-0.150563	0.37374	0.143098	0.398158	0.540041	0.000560701
black	ENSMUSG00000104546	NA	NA	NA	-0.31198	0.0601365	-0.326122	0.0488537	-0.16325	0.33433	-0.134528	0.427294	0.321875	0.0520474	-0.406837	0.0124578	-0.258107	0.122981	0.108574	0.522397	-0.189399	0.261555	-0.0312409	0.854364	0.373436	0.0228091	0.0217694	0.898237	0.330227	0.0459189	0.232419	0.166277	-0.211451	0.208999	-0.295435	0.0758576	0.86125	7.91e-12
black	ENSMUSG00000114796	NA	NA	NA	0.0677635	0.690261	0.158338	0.349275	-0.0213679	0.900105	-0.01142	0.946516	0.01656	0.922504	0.0104216	0.951186	0.198313	0.239347	-0.205839	0.221617	-0.0452352	0.790357	-0.0287878	0.865691	-0.164545	0.33046	-0.079002	0.642086	0.409686	0.0117985	0.103604	0.541719	-0.144244	0.39435	-0.0494074	0.771513	0.734774	2.24e-07
black	ENSMUSG00000033792	11977	Atp7a	ATPase, Cu++ transporting, alpha polypeptide	-0.145283	0.390916	-0.239232	0.153855	-0.138463	0.41377	-0.0651312	0.701729	0.238333	0.155453	-0.314261	0.0581894	-0.24781	0.139191	0.0582939	0.731817	-0.240914	0.150893	0.0369721	0.828015	0.409232	0.0119017	0.0365753	0.829834	0.248698	0.137734	0.20954	0.213239	-0.15187	0.369558	-0.327335	0.0479711	0.878139	9.39e-13
black	ENSMUSG00000029088	80334	Kcnip4	Kv channel interacting protein 4	0.00939626	0.955983	-0.199175	0.237271	-0.215983	0.199178	-0.101424	0.550303	0.249089	0.137097	0.154248	0.362019	0.0753536	0.65758	-0.0355715	0.834439	-0.0617	0.716776	0.0534459	0.753396	0.035399	0.83523	0.000661071	0.996902	0.229057	0.172666	0.115748	0.495113	-0.127749	0.451154	-0.128705	0.447746	0.479508	0.00267386
black	ENSMUSG00000106087	NA	NA	NA	0.281232	0.091762	0.159085	0.346975	0.0195166	0.908722	0.350722	0.0333153	-0.215801	0.199565	0.419708	0.00970964	0.613449	5.41e-05	-0.467731	0.00351051	-0.191498	0.256205	-0.24473	0.144333	-0.447439	0.00549141	0.0225675	0.894527	0.310635	0.0613099	-0.000410471	0.998076	-0.0853288	0.615571	0.133776	0.429903	0.55362	0.000378838
black	ENSMUSG00000115908	NA	NA	NA	0.11877	0.483841	-0.00966281	0.954736	0.0464067	0.785054	0.3033	0.0680258	-0.1063	0.531197	-0.101115	0.551523	0.0577835	0.73408	-0.0965098	0.569881	-0.509851	0.00126662	-0.258019	0.123112	0.277291	0.0965993	-0.0888642	0.600958	0.47968	0.00266307	0.306301	0.0652112	-0.148197	0.381382	-0.199414	0.236697	0.694107	1.89e-06
black	ENSMUSG00000097426	NA	NA	NA	-0.073458	0.665686	-0.159799	0.344788	-0.133316	0.431505	-0.100349	0.554559	0.239674	0.153073	-0.0721038	0.671501	-0.0878074	0.60531	0.032917	0.846641	-0.213037	0.205525	-0.0466593	0.783912	0.282651	0.0900665	0.049686	0.77026	0.355124	0.0310176	0.175118	0.299885	-0.163069	0.334875	-0.24467	0.144435	0.904973	1.51e-14
black	ENSMUSG00000029607	66729	Ankrd61	ankyrin repeat domain 61	-0.183665	0.276536	-0.265014	0.112925	-0.0554728	0.74435	-0.16925	0.316622	0.393084	0.0160952	-0.178459	0.290613	-0.131625	0.437425	0.0368018	0.828796	0.0733505	0.666147	0.0430801	0.800137	0.107882	0.525064	0.147141	0.384821	-0.010817	0.949336	-0.0375878	0.825195	-0.170876	0.311929	0.0232255	0.89147	0.534007	0.000663935
black	ENSMUSG00000084781	320507	D930015M05Rik	RIKEN cDNA D930015M05 gene	0.0307186	0.856773	-0.078844	0.642754	-0.0627047	0.712359	0.163565	0.333386	0.0131775	0.938299	-0.0235534	0.889947	0.173615	0.304119	-0.173106	0.30556	-0.313738	0.0586309	-0.218372	0.194133	-0.113253	0.504516	-0.404317	0.0130666	0.306294	0.0652179	0.0772552	0.649486	-0.332843	0.0441233	-0.16339	0.33391	0.560326	0.000310192
black	ENSMUSG00000010492	100271841	Uckl1os	uridine-cytidine kinase 1-like 1, opposite strand	-0.18265	0.279244	-0.214953	0.20138	-0.0825918	0.626985	-0.273699	0.101177	0.359457	0.0288842	-0.0614768	0.717758	-0.298348	0.072879	0.291885	0.0796145	0.101622	0.549522	0.170348	0.313448	0.38729	0.0178753	0.381374	0.01986	0.219783	0.191194	0.298934	0.0722903	-0.0229744	0.892636	-0.0290845	0.86432	0.612771	5.54e-05
black	ENSMUSG00000086682	100502734	Gm16023	predicted gene 16023	-0.245037	0.143815	-0.181085	0.283455	-0.0572936	0.736253	-0.121911	0.472268	0.296535	0.0747212	-0.438236	0.00666906	-0.453367	0.00483193	0.287041	0.0849725	-0.285692	0.0865136	-0.0191661	0.910354	0.70815	9.44e-07	0.114109	0.501279	0.297653	0.0735811	0.379346	0.0205814	-0.0665328	0.695615	-0.337884	0.0408234	0.724969	3.88e-07
black	ENSMUSG00000097910	75996	5033428I22Rik	RIKEN cDNA 5033428I22 gene	-0.0456423	0.788513	0.0532278	0.754371	0.0231536	0.891804	-0.025886	0.879124	0.0296178	0.861855	-0.257129	0.124456	-0.0633232	0.709644	-0.0167516	0.92161	-0.0961207	0.571445	-0.00344885	0.983837	0.155715	0.357416	0.110818	0.513784	0.222814	0.184992	0.35229	0.0324816	-0.0216527	0.89878	-0.129799	0.443864	0.365882	0.0259444
black	ENSMUSG00000112139	NA	NA	NA	-0.206246	0.220686	-0.180952	0.283815	-0.135378	0.424349	-0.118289	0.485627	0.226975	0.176708	-0.0273452	0.872365	-0.0149876	0.929844	-0.058837	0.729412	-0.112395	0.507771	0.0451677	0.790663	0.187844	0.265562	0.230557	0.169793	0.190425	0.25893	-0.0910465	0.592013	-0.0461906	0.786031	-0.116922	0.490718	0.43598	0.00698887
black	ENSMUSG00000087314	NA	NA	NA	-0.165218	0.328458	-0.0126061	0.94097	-0.109035	0.520618	-0.179077	0.288917	0.232366	0.166376	-0.0456118	0.788651	-0.0579467	0.733356	0.108088	0.524271	0.133588	0.430559	0.0318608	0.851506	0.0035454	0.983385	0.0314177	0.853548	0.262225	0.116908	0.0642865	0.705424	-0.0864019	0.61112	0.00599478	0.971909	0.553612	0.00037893
black	ENSMUSG00000102374	NA	NA	NA	-0.164442	0.330767	-0.0943878	0.578433	0.0700858	0.6802	-0.0616977	0.716786	0.230352	0.170185	-0.123215	0.467509	0.0405464	0.811674	-0.10404	0.540013	-0.163355	0.334016	-0.257521	0.123864	0.100923	0.552283	0.128011	0.450219	0.181771	0.281604	0.0826431	0.62677	-0.186472	0.269133	-0.123774	0.465475	0.398716	0.0145102
black	ENSMUSG00000114705	NA	NA	NA	-0.164684	0.330046	-0.325595	0.0492416	-0.283764	0.0887531	-0.104885	0.536708	0.295512	0.0757776	-0.152626	0.36715	-0.156309	0.355563	0.0897491	0.597324	-0.150716	0.37325	-0.0648464	0.702974	0.246789	0.140881	-0.0476016	0.779654	0.305506	0.0659484	0.0330389	0.846079	-0.252393	0.131793	-0.191984	0.254979	0.827596	2.67e-10
black	ENSMUSG00000109005	NA	NA	NA	-0.115262	0.496935	-0.147241	0.384494	-0.190421	0.258941	0.0855107	0.614815	0.131353	0.438378	-0.01458	0.931747	0.0578555	0.733761	-0.0446786	0.79288	-0.232357	0.166393	-0.127873	0.45071	0.00405757	0.980985	-0.239091	0.154104	0.291601	0.0799214	0.0773908	0.648911	-0.0861366	0.612219	-0.164638	0.330181	0.55755	0.000337132
black	ENSMUSG00000115692	NA	NA	NA	-0.108279	0.523531	0.00679073	0.968182	-0.218555	0.19375	-0.176074	0.297213	0.167055	0.323031	-0.0223117	0.895716	-0.0678522	0.689876	0.138834	0.412509	-0.0323737	0.849143	0.0440966	0.79552	0.219736	0.191293	0.0749769	0.659188	0.330177	0.0459533	0.181727	0.281723	-0.0120588	0.943529	-0.0278094	0.870217	0.712013	7.74e-07
black	ENSMUSG00000000948	NA	NA	NA	-0.0633663	0.709456	0.0153456	0.928172	0.191851	0.255314	-0.118356	0.485379	0.112932	0.505735	0.131645	0.437352	0.238155	0.155772	-0.194588	0.248466	0.0397734	0.815202	0.0259366	0.87889	-0.237308	0.157293	-0.00949754	0.955509	0.14655	0.386754	0.0258754	0.879174	0.0667257	0.694775	-0.00384395	0.981986	0.510699	0.00123919
black	ENSMUSG00000102302	NA	NA	NA	-0.188182	0.264688	-0.161216	0.340471	-0.165261	0.328329	-0.140466	0.406982	0.150758	0.373115	-0.32143	0.0523912	-0.259875	0.120344	0.177662	0.292809	-0.103883	0.540628	0.0804532	0.635964	0.344596	0.0367433	0.0249586	0.883425	0.26252	0.116482	0.163214	0.334441	-0.0294035	0.862845	-0.229225	0.172343	0.766757	3.14e-08
black	ENSMUSG00000087556	NA	NA	NA	-0.0478687	0.778449	-0.323979	0.0504454	-0.196257	0.244354	-0.0199236	0.906826	0.350836	0.0332543	-0.174257	0.302305	-0.182481	0.279697	-0.0442433	0.794855	-0.16062	0.342282	0.115241	0.497015	0.37501	0.022197	0.49745	0.00173319	-0.00842898	0.960511	0.0942529	0.578978	-0.0137891	0.935441	-0.215145	0.20097	0.684938	2.92e-06
black	ENSMUSG00000004347	18575	Pde1c	phosphodiesterase 1C	0.337574	0.0410206	0.161733	0.338905	0.237427	0.157077	0.173287	0.305047	-0.0940568	0.579772	0.182811	0.278815	0.211286	0.209362	-0.284245	0.0881904	-0.0460805	0.78653	0.255594	0.1268	-0.168023	0.320196	0.190892	0.257744	-0.132194	0.435426	0.111899	0.509658	0.232126	0.166827	-0.091109	0.591758	0.424265	0.00886926
black	ENSMUSG00000091575	69206	2010016I18Rik	RIKEN cDNA 2010016I18 gene	0.154823	0.360211	0.177738	0.292598	0.22253	0.185567	0.216131	0.198863	-0.0584858	0.730967	0.0515513	0.76188	0.27738	0.096488	-0.374168	0.0225225	-0.395455	0.0154112	-0.0304733	0.857906	-0.0781338	0.64576	-0.0756581	0.656281	-0.0559702	0.742136	-0.21378	0.203911	0.113174	0.504816	-0.229035	0.172709	0.582705	0.000154205
black	ENSMUSG00000111118	NA	NA	NA	0.036572	0.829849	-0.0849787	0.617026	-0.0463908	0.785126	0.0421962	0.804157	0.168466	0.318904	0.0289827	0.86479	0.167925	0.320484	-0.266357	0.111044	-0.239067	0.154147	0.179487	0.287797	-0.0354596	0.834952	0.0851832	0.616176	-0.12141	0.474106	-0.299639	0.0715882	0.0910699	0.591917	-0.169949	0.314601	0.711869	7.8e-07
black	ENSMUSG00000078190	474332	Dnm3os	dynamin 3, opposite strand	-0.0271136	0.873437	-0.0247057	0.884598	-0.0739333	0.66365	-0.055877	0.742551	0.152855	0.366424	-0.128748	0.447595	-0.142737	0.39936	0.139411	0.410549	-0.0944305	0.57826	-0.2335	0.164259	0.23442	0.162555	-0.0809279	0.633966	0.448612	0.00535508	0.443457	0.00597693	-0.319263	0.0540929	-0.112079	0.508972	0.586515	0.000136205
black	ENSMUSG00000107760	NA	NA	NA	-0.351691	0.0327979	-0.288282	0.0835748	-0.320903	0.0528015	-0.226077	0.178474	0.315601	0.0570687	-0.145716	0.38949	-0.261403	0.118102	0.249398	0.136594	0.145049	0.391688	-0.0633165	0.709674	0.124076	0.464378	-0.15618	0.355966	0.309606	0.062219	0.0328283	0.847049	-0.299864	0.0713649	-0.0884891	0.602501	0.497577	0.00172774
black	ENSMUSG00000044471	232685	Lncpint	long non-protein coding RNA, Trp53 induced transcript	-0.0740364	0.663209	-0.160036	0.344065	-0.235953	0.159746	-0.0516266	0.761542	0.0835657	0.622913	-0.328982	0.0467937	-0.215995	0.199152	0.231445	0.168109	-0.221742	0.187169	-0.0746398	0.660628	0.378969	0.0207178	0.0266917	0.875391	0.314964	0.0575992	0.324709	0.0498988	-0.101206	0.551163	-0.0876715	0.605871	0.464511	0.0037756
black	ENSMUSG00000115624	NA	NA	NA	-0.21747	0.196026	-0.0656359	0.699525	-0.120623	0.476996	-0.249951	0.135698	0.239781	0.152883	-0.275335	0.099072	-0.361798	0.027783	0.390473	0.016878	0.07677	0.651547	0.0301927	0.859201	0.334171	0.0432341	-0.047722	0.779111	0.348742	0.0343938	0.265357	0.112442	-0.195323	0.24665	3.58e-06	0.999983	0.64739	1.49e-05
black	ENSMUSG00000077426	NA	NA	NA	-0.246986	0.140553	-0.271693	0.103805	-0.234125	0.163101	-0.158352	0.349231	0.244752	0.144295	-0.157081	0.353162	-0.168069	0.320061	0.130861	0.440111	-0.0729754	0.667756	-0.0265308	0.876136	0.31709	0.0558435	0.133783	0.429881	0.193117	0.252132	0.10323	0.543187	-0.235332	0.16088	-0.0546091	0.7482	0.33003	0.046056
black	ENSMUSG00000108825	NA	NA	NA	-0.0555664	0.743933	-0.106979	0.528561	0.0121021	0.943326	0.139802	0.409226	0.00451891	0.978823	-0.238252	0.155599	0.0430588	0.800234	-0.183944	0.275794	-0.527532	0.00079317	-0.0879967	0.60453	0.278719	0.0948244	-0.116481	0.492368	0.339335	0.0399121	0.162604	0.336274	-0.114176	0.501029	-0.397409	0.0148659	0.876861	1.12e-12
black	ENSMUSG00000086935	NA	NA	NA	0.180333	0.285493	0.157636	0.351441	0.109813	0.517632	0.162259	0.337314	-0.0254124	0.88132	0.103975	0.540266	0.164103	0.331778	-0.119578	0.480852	-0.204951	0.223663	-0.0214033	0.89994	-0.0520864	0.759481	-0.215933	0.199284	0.257044	0.124586	0.0690334	0.684753	-0.062179	0.714669	-0.045043	0.791228	0.587966	0.000129866
black	ENSMUSG00000026770	16184	Il2ra	interleukin 2 receptor, alpha chain	0.184414	0.274547	0.0835	0.623188	0.206254	0.220667	0.317588	0.0554382	-0.0631665	0.710332	0.108163	0.523979	0.331827	0.0448135	-0.387447	0.0178251	-0.443834	0.00592945	-0.0879413	0.604758	-0.0407058	0.810947	0.0725572	0.669552	0.0960444	0.571752	0.0114805	0.946233	0.0507497	0.765478	-0.151901	0.369457	0.673573	4.9e-06
black	ENSMUSG00000061436	15258	Hipk2	homeodomain interacting protein kinase 2	-0.125905	0.457769	-0.182289	0.280212	-0.0823608	0.627952	-0.0841874	0.62032	0.304879	0.0665331	-0.177707	0.292683	-0.225178	0.180254	0.13557	0.423686	-0.166719	0.324021	0.0493245	0.771887	0.345555	0.0361884	0.0159054	0.925559	0.240204	0.152138	0.125241	0.460163	-0.0584012	0.731342	-0.170412	0.313265	0.907595	9.43e-15
black	ENSMUSG00000109390	NA	NA	NA	-0.107728	0.525662	-0.104773	0.537145	0.122191	0.471245	-0.00182605	0.991442	0.144113	0.394785	-0.37235	0.0232394	-0.303082	0.0682344	0.123892	0.465048	-0.309705	0.0621311	-0.085876	0.613299	0.447488	0.00548573	3.73e-05	0.999825	0.217283	0.196421	0.162857	0.335513	-0.129575	0.444659	-0.323548	0.0507698	0.61777	4.63e-05
black	ENSMUSG00000097267	74303	1700109K24Rik	RIKEN cDNA 1700109K24 gene	0.0129189	0.939508	0.0222367	0.896065	-0.108528	0.522573	0.104517	0.538143	-0.159382	0.346064	-0.0317114	0.852195	0.0787505	0.643149	-0.0822343	0.628482	-0.237433	0.157067	-0.0915849	0.589815	0.141419	0.403774	-0.0206021	0.903668	0.313068	0.059201	0.0646782	0.70371	-0.072652	0.669145	-0.201964	0.230632	0.651695	1.25e-05
black	ENSMUSG00000102411	NA	NA	NA	-0.214022	0.203388	-0.319449	0.0539452	-0.0517159	0.761142	-0.0806152	0.635282	0.292208	0.0792664	-0.240051	0.152408	-0.0291391	0.864067	-0.100137	0.555399	-0.199919	0.235487	0.0579822	0.733199	0.145772	0.389308	-0.0236774	0.889371	0.199369	0.236804	0.10433	0.538875	-0.0900842	0.59595	-0.2714	0.104192	0.878994	8.36e-13
black	ENSMUSG00000005893	22026	Nr2c2	nuclear receptor subfamily 2, group C, member 2	0.00696675	0.967357	-0.070337	0.679115	-0.0213117	0.900366	-0.00870809	0.959204	0.191311	0.25668	-0.0199291	0.906801	0.0679508	0.689448	-0.172212	0.308102	-0.19465	0.248314	-0.0790335	0.641953	0.108883	0.521205	0.141044	0.405035	0.292835	0.0785948	0.110109	0.516495	-0.150121	0.37516	-0.213554	0.204401	0.94438	1.76e-18
black	ENSMUSG00000092341	72289	Malat1	metastasis associated lung adenocarcinoma transcript 1 (non-coding RNA)	-0.0244054	0.885992	-0.173516	0.304397	-0.12845	0.448654	0.050535	0.766442	0.193887	0.250208	-0.127072	0.453577	-0.142492	0.400181	0.0214868	0.899552	-0.305813	0.0656632	-0.0927716	0.584984	0.489211	0.00212113	0.326685	0.0484427	0.181463	0.282434	0.165214	0.328468	-0.151381	0.37112	-0.221613	0.187432	0.828504	2.45e-10
black	ENSMUSG00000052229	574402	Gpr17	G protein-coupled receptor 17	-0.0166337	0.92216	0.0511993	0.763459	-0.1022	0.547239	0.128771	0.447512	-0.0935069	0.581999	-0.0520121	0.759814	0.098786	0.560773	0.00548586	0.974293	-0.332464	0.04438	-0.086222	0.611865	0.00704192	0.967005	-0.576876	0.000185902	0.4783	0.00275077	0.183031	0.278225	-0.0650227	0.702204	-0.175895	0.297712	0.620905	4.13e-05
black	ENSMUSG00000092354	NA	NA	NA	0.00232959	0.989082	-0.0576491	0.734676	0.1036	0.541736	0.138269	0.414431	-0.0264889	0.87633	-0.191069	0.257292	0.188565	0.2637	-0.323216	0.0510219	-0.276547	0.0975344	0.068979	0.684989	-0.00688835	0.967724	0.114557	0.499592	0.101072	0.551693	-0.0775982	0.64803	0.0500339	0.768695	-0.177591	0.293005	0.549528	0.000427107
black	ENSMUSG00000108368	NA	NA	NA	0.159622	0.345329	0.231316	0.168353	0.21896	0.192904	0.285101	0.087196	-0.217094	0.196819	0.248322	0.13835	0.296134	0.0751341	-0.190089	0.259789	-0.31629	0.0564989	-0.285172	0.0871129	0.016338	0.92354	-0.00963179	0.954881	0.364776	0.026432	0.269414	0.106851	-0.120616	0.477022	-0.0212501	0.900653	0.497204	0.00174377
black	ENSMUSG00000103821	NA	NA	NA	-0.0981921	0.563143	-0.161458	0.339737	0.0517125	0.761157	0.0447331	0.792633	0.250309	0.13512	-0.273189	0.101839	-0.269056	0.107336	0.0157808	0.92614	-0.312472	0.0597123	-0.318524	0.0546829	0.494097	0.00188281	0.20869	0.215143	0.248947	0.137328	0.199185	0.237246	-0.289909	0.0817681	-0.312977	0.0592794	0.634977	2.43e-05
black	ENSMUSG00000113898	NA	NA	NA	0.0935614	0.581778	-0.0295172	0.86232	-0.167453	0.321865	-0.0236097	0.889685	0.163766	0.332784	-0.0171268	0.91986	-0.184093	0.275399	0.154267	0.36196	-0.0057434	0.973087	-0.109995	0.516931	0.281927	0.0909288	0.253075	0.130717	0.181487	0.28237	0.27452	0.100117	-0.0720456	0.671751	-0.0365117	0.830125	0.435411	0.00707153
black	ENSMUSG00000110245	NA	NA	NA	-0.249451	0.136508	-0.215079	0.201111	-0.179932	0.286583	-0.120734	0.476588	0.24348	0.146458	-0.447484	0.00548614	-0.0943479	0.578594	-0.105022	0.536172	-0.204865	0.22386	0.134264	0.428209	0.16035	0.343106	-0.111752	0.510218	0.197374	0.241626	0.0294014	0.862855	0.0368891	0.828395	-0.378668	0.0208272	0.701924	1.29e-06
black	ENSMUSG00000102559	NA	NA	NA	-0.0334731	0.844081	-0.143965	0.395276	-0.0807775	0.634599	0.0373573	0.82625	0.11889	0.483398	0.0129247	0.939481	0.0358773	0.833035	-0.014955	0.929996	-0.230414	0.170066	-0.0769888	0.650618	0.18084	0.284118	0.043924	0.796304	0.355758	0.0306978	0.175307	0.299355	-0.213526	0.204461	-0.0598002	0.725153	0.768575	2.78e-08
black	ENSMUSG00000106617	NA	NA	NA	0.0490455	0.773143	-0.17329	0.305038	-0.121237	0.474739	0.00128655	0.99397	0.0400271	0.814044	0.016293	0.92375	0.22477	0.181065	-0.121694	0.473063	-0.0768091	0.651381	-0.0672441	0.692519	-0.203583	0.226836	-0.146423	0.387169	0.0692134	0.683973	-0.0188904	0.911639	-0.0868915	0.609093	0.0683393	0.687762	0.337846	0.0408477
black	ENSMUSG00000067786	18111	Nnat	neuronatin	0.0487746	0.774363	-0.0278866	0.869859	-0.156429	0.355189	-0.0329831	0.846336	0.23628	0.15915	0.1838	0.276176	0.0407108	0.810924	0.0540578	0.750662	0.167971	0.320349	0.0104437	0.951082	-0.0646963	0.70363	0.192133	0.254604	0.329441	0.0464692	0.241793	0.149363	-0.115217	0.497105	0.20355	0.226913	0.579394	0.000171552
black	ENSMUSG00000113328	NA	NA	NA	-0.0744142	0.661592	-0.120576	0.477169	-0.0829646	0.625425	-0.152213	0.368463	0.224695	0.181213	-0.128658	0.447912	-0.324734	0.0498797	0.204739	0.224151	-0.145891	0.388916	0.177166	0.294178	0.56403	0.000277265	0.367334	0.0253156	0.00902053	0.957742	0.211794	0.208244	0.180649	0.284635	-0.298511	0.0727153	0.612612	5.57e-05
black	ENSMUSG00000079671	72481	2610203C22Rik	RIKEN cDNA 2610203C22 gene	0.20741	0.218034	0.0632186	0.710103	0.123214	0.467514	0.220355	0.190014	-0.104742	0.537265	0.247006	0.14052	0.503221	0.00150002	-0.595496	0.000101029	-0.212414	0.206884	-0.145872	0.388978	-0.314644	0.0578665	0.241679	0.149562	0.0480347	0.7777	-0.148981	0.378838	-0.206348	0.220453	-0.17457	0.301424	0.566878	0.000254103
black	ENSMUSG00000045746	NA	NA	NA	-0.0393372	0.817194	-0.206312	0.220535	-0.119229	0.482141	-0.0701631	0.679866	0.255253	0.127324	-0.15206	0.368951	-0.203963	0.225952	0.192065	0.254775	-0.0908405	0.592855	-0.266559	0.110763	0.253156	0.130589	0.0724159	0.670159	0.218237	0.194415	0.0855756	0.614546	-0.341077	0.0388391	0.0222734	0.895894	0.551101	0.000407939
black	ENSMUSG00000097276	320163	4930525G20Rik	RIKEN cDNA 4930525G20 gene	-0.200656	0.233728	-0.119406	0.481488	-0.206914	0.219162	-0.241949	0.149093	0.291637	0.0798828	-0.0494959	0.771115	-0.128292	0.449216	0.0677765	0.690205	-0.0833532	0.623801	-0.0126483	0.940773	0.243004	0.147274	0.108747	0.521729	0.13251	0.434321	-0.0735123	0.665453	-0.127679	0.451406	-0.242409	0.148298	0.469992	0.00333425
black	ENSMUSG00000104443	NA	NA	NA	0.0827415	0.626358	0.0516755	0.761323	0.11898	0.483064	0.0259967	0.878611	-0.0268858	0.874492	0.127304	0.452745	0.395262	0.015466	-0.287054	0.084958	-0.112758	0.506392	-0.0547437	0.7476	-0.275477	0.0988908	-0.039108	0.818241	0.183227	0.277701	-0.0965508	0.569717	-0.0958133	0.572682	0.0860149	0.612723	0.662858	7.82e-06
black	ENSMUSG00000108120	NA	NA	NA	-0.0789197	0.642434	-0.0451103	0.790923	-0.184726	0.273721	-0.125395	0.459608	0.103125	0.5436	-0.286559	0.0855206	-0.168762	0.31804	0.158119	0.34995	-0.170885	0.311902	-0.0629041	0.711483	0.329472	0.0464473	-0.0382141	0.822328	0.279102	0.0943534	0.108673	0.522015	-0.0224436	0.895103	-0.153283	0.365069	0.6948	1.83e-06
black	ENSMUSG00000035295	76646	Wdr38	WD repeat domain 38	-0.0849343	0.61721	-0.214849	0.201605	-0.204488	0.224734	-0.0340112	0.841606	0.224722	0.181161	-0.216285	0.198534	-0.0707437	0.677359	-0.0285175	0.866941	-0.0932531	0.583029	0.108607	0.522269	0.145134	0.391409	0.192835	0.252839	0.0183614	0.914104	0.0934625	0.582179	0.207654	0.217482	-0.124892	0.461425	0.459319	0.00423978
black	ENSMUSG00000108563	NA	NA	NA	0.205205	0.223076	0.374253	0.0224897	0.1618	0.338702	-0.0161407	0.924461	-0.242729	0.147747	0.0850089	0.6169	0.0165379	0.922607	0.0658784	0.698467	-0.119143	0.48246	0.0921687	0.587436	0.155838	0.357034	-0.0258602	0.879244	0.229271	0.172254	0.275326	0.0990838	0.106641	0.529873	-0.124981	0.461102	0.365534	0.0260971
black	ENSMUSG00000107560	NA	NA	NA	-0.0185376	0.913283	-0.0146406	0.931464	0.0727558	0.668699	-0.0936208	0.581538	0.26704	0.110096	-0.111552	0.510981	-0.26544	0.112327	0.125993	0.45745	-0.0133322	0.937576	0.104391	0.538638	0.306984	0.0645841	0.140774	0.405941	0.0885312	0.602327	0.163809	0.332656	0.0297607	0.861195	-0.224603	0.181397	0.572808	0.000211365
black	ENSMUSG00000086693	NA	NA	NA	-0.239659	0.153098	-0.177508	0.293234	-0.00149677	0.992985	-0.0508856	0.764867	0.0957222	0.573048	-0.476146	0.00289274	-0.22245	0.18573	0.158539	0.348656	-0.26033	0.119674	0.138845	0.412472	0.353002	0.0321083	-0.161135	0.340715	0.185232	0.272388	0.158363	0.349196	0.0796383	0.639399	-0.19239	0.253956	0.48781	0.00219414
black	ENSMUSG00000109674	NA	NA	NA	-0.19512	0.247151	-0.302783	0.0685202	-0.174562	0.301446	-0.115336	0.496658	0.200695	0.233636	-0.0941449	0.579415	0.272665	0.102524	-0.322761	0.0513675	-0.133653	0.430331	0.0969216	0.568228	-0.215235	0.200776	0.0328702	0.846856	0.0583059	0.731764	-0.161343	0.340084	-0.0464285	0.784955	-0.187589	0.266225	0.632459	2.67e-05
black	ENSMUSG00000069892	245240	9930111J21Rik2	RIKEN cDNA 9930111J21 gene 2	-0.0883077	0.603248	-0.196019	0.244936	0.120875	0.476071	-0.189187	0.262098	0.350015	0.0336971	-0.171407	0.310404	-0.223212	0.184189	0.00331871	0.984447	-0.0817919	0.630337	0.365483	0.0261196	0.293364	0.078032	0.154859	0.360097	-0.0234296	0.890522	0.106064	0.532113	0.185755	0.271012	-0.343449	0.0374161	0.705368	1.09e-06
black	ENSMUSG00000112028	78638	1700113B09Rik	RIKEN cDNA 1700113B09 gene	-0.0187727	0.912187	-0.0633608	0.70948	-0.1129	0.505854	-0.0153063	0.928356	-0.0239491	0.888109	-0.00546882	0.974373	0.091649	0.589554	-0.0327529	0.847396	-0.0404529	0.8121	-0.0674978	0.691416	-0.155377	0.358475	-0.283395	0.089187	0.0762895	0.653591	-0.260498	0.119427	-0.161071	0.34091	-0.108768	0.521649	0.375219	0.0221168
black	ENSMUSG00000113918	625237	Gm6566	predicted gene 6566	0.244026	0.145527	0.149699	0.376518	0.136298	0.421178	0.214473	0.202414	-0.0933653	0.582574	0.156541	0.354839	0.213525	0.204463	-0.153468	0.364484	-0.2445	0.144721	-0.102605	0.545647	-0.0155973	0.926997	-0.10546	0.534462	0.359382	0.02892	0.34628	0.0357737	-0.00367971	0.982755	-0.0721808	0.67117	0.63952	2.03e-05
black	ENSMUSG00000034645	230590	Zyg11a	zyg-11 family member A, cell cycle regulator	-0.235378	0.160797	-0.361847	0.02776	-0.246176	0.141902	-0.343093	0.0376272	0.484992	0.00234774	-0.138975	0.412027	-0.274035	0.100741	0.166873	0.323566	0.161075	0.340899	0.180771	0.284305	0.32045	0.0531554	0.492873	0.0019402	-0.0077272	0.963796	-0.05601	0.741959	-0.0698033	0.681421	-0.00711217	0.966676	0.650535	1.31e-05
black	ENSMUSG00000097904	NA	NA	NA	-0.0435192	0.798142	-0.128046	0.450093	-0.0752431	0.658051	0.101188	0.551236	0.0739455	0.663598	-0.11245	0.507563	-0.129369	0.445389	0.00874293	0.959041	-0.156991	0.353442	-0.0383076	0.821901	0.24219	0.148675	0.149393	0.377505	0.150109	0.3752	0.246135	0.14197	0.00678223	0.968221	-0.211455	0.208991	0.499252	0.00165719
black	ENSMUSG00000107962	NA	NA	NA	0.0218052	0.898071	-0.0815727	0.631257	0.0330439	0.846057	0.0184108	0.913873	0.117291	0.489341	-0.0880737	0.604212	0.0539822	0.750999	-0.165691	0.327055	-0.314524	0.0579674	-0.0284286	0.867352	0.227524	0.175636	0.244571	0.144602	0.234252	0.162865	0.198432	0.23906	-0.00249742	0.988296	-0.238207	0.155679	0.861953	7.28e-12
black	ENSMUSG00000106965	NA	NA	NA	0.316526	0.0563048	0.0665702	0.695452	0.151601	0.370416	0.429415	0.00799523	-0.28794	0.0839583	0.145769	0.389317	0.448751	0.00533916	-0.55962	0.000316861	-0.570027	0.000230533	-0.28377	0.0887461	-0.0369986	0.827894	0.182625	0.27931	0.187325	0.266911	-0.0283978	0.867495	-0.150088	0.375266	-0.223273	0.184065	0.621346	4.06e-05
black	ENSMUSG00000060206	242466	Zfp462	zinc finger protein 462	0.309331	0.0624636	0.182653	0.279238	0.287833	0.0840781	0.306051	0.0654425	-0.149498	0.377169	0.0448286	0.7922	0.167583	0.321484	-0.295598	0.0756876	-0.320153	0.0533889	-0.269956	0.10612	0.110056	0.5167	0.375628	0.0219604	0.269673	0.106501	0.298978	0.0722472	-0.0327515	0.847403	-0.151961	0.369267	0.504528	0.00145121
black	ENSMUSG00000102555	NA	NA	NA	-0.126942	0.454041	-0.305857	0.0656221	-0.0399469	0.81441	0.0841028	0.620673	0.175184	0.299701	-0.166282	0.325307	-0.144252	0.394324	-0.0268194	0.8748	-0.369438	0.0244267	0.0455054	0.789133	0.433855	0.00730191	0.264572	0.11355	0.181342	0.282762	0.184383	0.27463	-0.047883	0.778384	-0.235691	0.160223	0.57387	0.000204433
black	ENSMUSG00000092399	75285	4930556N13Rik	RIKEN cDNA 4930556N13 gene	0.0811017	0.633236	0.112492	0.507403	-0.0312549	0.854299	0.065951	0.698151	-0.0129258	0.939476	-0.0214842	0.899564	0.0587887	0.729626	-0.156625	0.35458	-0.312241	0.0599115	-0.122631	0.469639	0.19764	0.240979	0.146367	0.387355	0.305136	0.0662929	0.196773	0.243091	-0.0853759	0.615375	-0.331522	0.0450225	0.793425	4.72e-09
black	ENSMUSG00000109408	78439	A930037H05Rik	RIKEN cDNA A930037H05 gene	0.133996	0.429137	-0.0263329	0.877053	-0.101191	0.551224	0.235455	0.160655	-0.0822299	0.628501	0.199982	0.235336	0.252163	0.132156	-0.0902119	0.595427	-0.225824	0.178973	-0.0815699	0.631269	-0.117679	0.487894	-0.204392	0.224956	0.324392	0.0501356	0.047351	0.780786	-0.119117	0.482555	0.0404436	0.812143	0.491962	0.00198389
black	ENSMUSG00000112280	414093	A830082N09Rik	RIKEN cDNA A830082N09 gene	-0.0308404	0.856211	-0.202195	0.230088	0.0270368	0.873793	-0.067941	0.68949	0.304096	0.0672709	-0.0409431	0.809865	-0.310967	0.0610182	0.167648	0.321294	-0.0693734	0.683281	0.223004	0.184607	0.429466	0.00798698	0.189112	0.262291	-0.0349568	0.837261	0.169387	0.316227	0.0853773	0.615369	-0.210835	0.210358	0.562034	0.000294596
black	ENSMUSG00000105556	NA	NA	NA	-0.00553302	0.974072	-0.137994	0.415369	-0.0725186	0.669718	0.03398	0.84175	0.0474843	0.780184	-0.0349519	0.837283	0.116621	0.491841	-0.146619	0.386526	-0.196256	0.244355	0.00576051	0.973007	-0.029672	0.861605	-0.241815	0.149326	0.268615	0.107935	0.0602791	0.723038	-0.104354	0.538784	-0.239586	0.153228	0.699409	1.46e-06
black	ENSMUSG00000086894	100504231	Gm15708	predicted gene 15708	0.0405656	0.811587	0.122918	0.46859	-0.0264792	0.876376	0.14583	0.389117	-0.00323402	0.984844	-0.169354	0.316323	-0.0529004	0.755836	0.105005	0.536237	-0.158265	0.349501	-0.0411699	0.808831	0.124941	0.461246	-0.258733	0.122042	0.352564	0.0323373	0.358685	0.029255	-0.0622612	0.714308	0.0485968	0.775165	0.414346	0.0107842
black	ENSMUSG00000087574	NA	NA	NA	0.0850893	0.616566	0.102467	0.546189	0.0250859	0.882834	-0.032238	0.849768	-0.0163211	0.923619	0.152736	0.366801	0.0987804	0.560796	-0.0303394	0.858523	0.187972	0.265231	0.223392	0.183825	-0.265738	0.111908	-0.103879	0.540642	-0.349712	0.0338617	-0.17708	0.294417	0.113108	0.505066	0.172974	0.305934	-0.392085	0.016391
black	ENSMUSG00000105909	NA	NA	NA	0.0948206	0.576684	0.0519108	0.760268	0.134617	0.426983	0.121879	0.472386	-0.000186866	0.999124	0.0776516	0.647804	0.167848	0.320707	-0.148577	0.380146	-0.306053	0.0654409	0.0124997	0.941467	0.0371236	0.827321	-0.15634	0.355466	0.220526	0.189661	0.0803389	0.636445	-0.0258598	0.879246	-0.126087	0.457114	0.696841	1.66e-06
black	ENSMUSG00000114253	NA	NA	NA	0.00901758	0.957756	0.00813106	0.961906	-0.0657285	0.699121	0.0345701	0.839038	0.118141	0.486177	-0.0591594	0.727985	-0.0376905	0.824725	0.0116564	0.94541	-0.221435	0.187797	-0.0266586	0.875544	0.249642	0.136197	0.0766021	0.652261	0.358154	0.0295127	0.266552	0.110773	-0.0516896	0.76126	-0.147163	0.384748	0.913837	2.92e-15
black	ENSMUSG00000087700	NA	NA	NA	0.40248	0.013526	0.13922	0.411196	0.151809	0.369752	0.103109	0.543662	-0.16613	0.325757	0.282669	0.0900443	0.360462	0.0284073	-0.324585	0.0499909	-0.0731197	0.667137	-0.149269	0.377906	-0.186239	0.269741	0.203912	0.22607	0.0579833	0.733194	-0.0796883	0.639188	-0.189216	0.262023	0.00837229	0.960776	0.425743	0.00861051
black	ENSMUSG00000110488	NA	NA	NA	-0.0819506	0.629671	-0.127845	0.450811	-0.0804869	0.635822	-0.196208	0.244473	0.383895	0.018993	0.113883	0.502135	0.156078	0.356282	-0.12419	0.463966	0.114437	0.500044	0.144492	0.393531	-0.247621	0.139503	0.0724197	0.670142	0.136747	0.419637	-0.133567	0.43063	-0.105822	0.533055	0.0815613	0.631305	0.649083	1.39e-05
black	ENSMUSG00000097772	100503199	5430416N02Rik	RIKEN cDNA 5430416N02 gene	-0.404181	0.0131003	-0.380397	0.0202049	-0.263591	0.114944	-0.307165	0.0644183	0.502201	0.00153909	-0.525129	0.000846526	-0.606842	6.84e-05	0.348941	0.0342839	-0.0778341	0.64703	0.0727133	0.668881	0.694485	1.86e-06	0.207955	0.216801	0.128433	0.448716	0.168728	0.31814	-0.104154	0.539564	-0.41258	0.0111595	0.673171	4.99e-06
black	ENSMUSG00000058656	320679	Samd12	sterile alpha motif domain containing 12	0.19477	0.248016	0.223767	0.183071	0.364576	0.0265211	0.209682	0.212922	0.00842419	0.960533	0.0292278	0.863658	0.0665806	0.695407	-0.193439	0.251327	-0.194151	0.249551	0.220017	0.190711	0.15855	0.348622	0.301821	0.0694479	-0.148112	0.381658	0.186508	0.26904	0.299508	0.0717189	-0.0601403	0.723651	0.464112	0.00380967
black	ENSMUSG00000079177	74855	Fam228a	family with sequence similarity 228, member A	-0.029502	0.86239	-0.0306937	0.856888	-0.00943783	0.955789	-0.0742641	0.662234	0.211779	0.208277	0.124273	0.463663	-0.00998595	0.953224	0.0737726	0.664338	0.00331591	0.98446	-0.344961	0.0365314	0.0135028	0.936779	-0.0355143	0.834701	0.381587	0.0197853	0.125081	0.46074	-0.463321	0.00387796	0.0791735	0.641361	0.561997	0.000294927
black	ENSMUSG00000095403	NA	NA	NA	-0.0149321	0.930102	0.0064622	0.96972	0.117128	0.48995	-0.00111999	0.994751	0.019242	0.910001	-0.203236	0.227645	-0.194362	0.249028	0.181877	0.28132	-0.0348951	0.837544	0.0405065	0.811856	0.372117	0.0233326	0.226071	0.178486	0.23038	0.170131	0.396475	0.0151244	0.170669	0.312523	0.0879918	0.60455	0.439537	0.00649045
black	ENSMUSG00000086837	NA	NA	NA	-0.195982	0.245028	-0.142508	0.400126	0.0335083	0.843919	-0.200684	0.233661	0.182203	0.280443	-0.149293	0.37783	-0.270063	0.105977	0.25709	0.124515	0.0007234	0.99661	0.0668106	0.694405	0.269557	0.106658	-0.0771162	0.650076	0.110774	0.513951	0.309759	0.062083	-0.0376061	0.825111	-0.152717	0.366863	0.415937	0.0104552
black	ENSMUSG00000058571	23888	Gpc6	glypican 6	0.268011	0.10876	0.174779	0.300838	0.16675	0.323928	0.271705	0.103788	-0.246568	0.141248	0.105802	0.533131	0.376431	0.0216564	-0.402732	0.0134622	-0.425646	0.0086274	-0.0675939	0.690998	-0.0921469	0.587525	0.0625574	0.713006	0.119264	0.482013	-0.000649486	0.996956	-0.00561718	0.973678	-0.136202	0.421511	0.588125	0.000129185
black	ENSMUSG00000097746	633947	Gm6225	predicted gene 6225	0.0913904	0.590609	-0.0956766	0.573232	0.0123745	0.942052	-0.058512	0.730851	0.204229	0.225333	-0.0421525	0.804356	-0.118945	0.483193	0.0765109	0.652649	0.0494452	0.771343	-0.0290128	0.864651	0.120736	0.476583	0.247675	0.139414	0.0613527	0.718305	0.0774433	0.648688	-0.110453	0.515179	0.0573395	0.73605	0.509056	0.00129279
black	ENSMUSG00000105272	NA	NA	NA	-0.0736045	0.665058	-0.168123	0.319904	-0.158048	0.350167	0.130862	0.440107	0.101155	0.551364	0.0127497	0.940299	0.0460493	0.78667	-0.107419	0.526855	-0.25381	0.129565	0.0729852	0.667714	0.199458	0.236591	0.138192	0.414694	0.0842368	0.620114	-0.0909121	0.592562	0.0472897	0.781063	-0.167795	0.320862	0.751468	8.34e-08
black	ENSMUSG00000107000	NA	NA	NA	0.202268	0.229915	0.132881	0.433024	-0.044284	0.79467	0.0879681	0.604647	-0.134928	0.425906	0.354457	0.0313573	0.470491	0.00329633	-0.349053	0.0342222	-0.178938	0.289298	-0.0304224	0.85814	-0.245468	0.143087	0.128065	0.450026	0.130902	0.439968	-0.166389	0.324994	-0.0869022	0.609049	-0.0331423	0.845604	0.631484	2.78e-05
black	ENSMUSG00000110393	NA	NA	NA	0.113519	0.503511	0.020652	0.903436	0.0357516	0.833612	0.222181	0.186276	-0.200715	0.233588	0.0316809	0.852335	0.42153	0.00936574	-0.494703	0.00185494	-0.232798	0.165567	0.142416	0.400434	-0.320932	0.0527789	-0.115882	0.494608	-0.0103269	0.951629	-0.030529	0.857648	0.16901	0.317319	-0.19338	0.251475	0.333603	0.0436126
black	ENSMUSG00000098062	NA	NA	NA	-0.137598	0.416721	-0.128379	0.448906	-0.30897	0.062786	-0.111185	0.512379	0.200896	0.233158	-0.167415	0.321976	-0.109503	0.518822	0.193287	0.251706	0.010893	0.94898	-0.0106424	0.950153	0.120054	0.479094	5.53e-06	0.999974	0.195828	0.245405	0.00560096	0.973754	-0.0547452	0.747594	0.136017	0.422145	0.374728	0.0223056
black	ENSMUSG00000102719	NA	NA	NA	0.0826421	0.626774	-0.0859157	0.613134	-0.194812	0.247912	0.170945	0.31173	0.108063	0.524365	0.088301	0.603275	0.0184935	0.913488	0.0191253	0.910544	-0.159497	0.345713	-0.333491	0.0436875	0.175947	0.297568	0.292287	0.0791819	0.287815	0.0840984	0.327714	0.047698	-0.237591	0.156783	0.050521	0.766505	0.413585	0.0109445
black	ENSMUSG00000055980	16367	Irs1	insulin receptor substrate 1	-0.181711	0.281767	-0.0571566	0.736862	-0.192195	0.254448	-0.183733	0.276354	0.278058	0.0956427	-0.22952	0.171776	-0.380153	0.0202917	0.474706	0.00299121	0.187939	0.265317	0.0835705	0.622893	0.242278	0.148524	-0.17923	0.288499	0.380847	0.0200453	0.270304	0.105653	-0.0503863	0.767111	0.139383	0.410643	0.484399	0.00238125
black	ENSMUSG00000030882	77505	Dnhd1	dynein heavy chain domain 1	-0.0211142	0.901285	-0.105364	0.534837	0.041729	0.806284	-0.190702	0.258225	0.17982	0.286888	0.211808	0.208214	0.113617	0.50314	-0.040377	0.812447	0.0148566	0.930455	-0.0808971	0.634096	-0.0161205	0.924555	0.19757	0.241147	0.0827333	0.626393	-0.0819573	0.629644	-0.216621	0.197822	0.00210849	0.990118	0.536077	0.000626756
black	ENSMUSG00000104814	NA	NA	NA	-0.349623	0.0339105	-0.352329	0.0324612	-0.268704	0.107814	-0.384833	0.0186784	0.46917	0.00339742	-0.287706	0.0842217	-0.364036	0.0267628	0.205255	0.222961	0.100591	0.553599	0.120167	0.478676	0.427381	0.0083313	0.326468	0.0486006	0.127661	0.451471	0.127278	0.452841	-0.125099	0.460676	-0.251719	0.132862	0.680284	3.62e-06
black	ENSMUSG00000091534	NA	NA	NA	0.431426	0.00767466	0.264465	0.113702	0.195432	0.246381	0.298528	0.0726974	-0.239022	0.154226	0.137101	0.418423	0.385196	0.0185578	-0.566067	0.000260518	-0.284814	0.0875286	-0.273131	0.101915	-0.165973	0.326222	0.277209	0.0967019	0.176487	0.296064	0.0891721	0.599692	-0.246371	0.141576	-0.228544	0.173656	0.422749	0.00914175
black	ENSMUSG00000118361	NA	NA	NA	0.112597	0.507003	0.0534654	0.753308	0.00564509	0.973547	0.336531	0.0416891	0.0194693	0.908942	-0.0272938	0.872603	0.0998159	0.556675	-0.0936007	0.581619	-0.333949	0.0433816	-0.0379794	0.823403	0.152019	0.369082	0.129726	0.444122	0.165166	0.328612	0.168676	0.318291	0.0836906	0.622392	0.0671213	0.693053	0.685789	2.81e-06
black	ENSMUSG00000034071	619331	Zfp551	zinc fingr protein 551	0.136773	0.419547	0.0114487	0.946381	-0.0353403	0.8355	0.231277	0.168428	-0.120009	0.47926	0.0830111	0.625231	0.239323	0.153692	-0.304934	0.0664819	-0.0982576	0.562881	-0.124376	0.463292	-0.20864	0.215257	0.0731163	0.667152	0.119261	0.482023	-0.0634626	0.709033	-0.102125	0.547535	-0.113803	0.502437	0.452518	0.00492192
black	ENSMUSG00000097364	NA	NA	NA	0.0537729	0.751934	0.0703214	0.679182	0.0971232	0.56742	0.262647	0.116299	-0.188386	0.264159	-0.0672828	0.69235	0.0470992	0.781923	-0.0249355	0.883532	-0.288775	0.083024	-0.131712	0.437117	-0.0109088	0.948906	-0.342096	0.0382228	0.00740779	0.965292	-0.0673757	0.691947	0.0162106	0.924135	-0.0532992	0.754051	-0.434552	0.00719798
black	ENSMUSG00000112229	NA	NA	NA	-0.193039	0.252327	-0.244278	0.145099	-0.131353	0.438379	-0.0458205	0.787706	0.0242823	0.886563	-0.235293	0.160951	-0.0429418	0.800766	0.0248451	0.883951	-0.133839	0.429683	-0.109426	0.519117	0.260642	0.119215	0.172053	0.308557	0.109224	0.519892	0.14433	0.394065	-0.0586861	0.73008	-0.0703013	0.679269	0.379257	0.0206136
black	ENSMUSG00000075576	100037262	Gm12359	predicted gene 12359	-0.194282	0.249226	-0.177789	0.292458	-0.286988	0.0850328	-0.139775	0.409316	0.311794	0.0602979	-0.106022	0.532277	-0.0793062	0.640801	0.188277	0.264442	0.0986689	0.56124	0.101457	0.550173	0.0415621	0.807044	-0.114074	0.501414	0.205465	0.222477	0.106374	0.530906	-0.0156922	0.926554	0.135188	0.425009	0.541533	0.000537498
black	ENSMUSG00000104016	NA	NA	NA	-0.0979649	0.564051	-0.0654945	0.700143	-0.269935	0.106149	-0.0602418	0.723203	-0.00402739	0.981126	-0.0657962	0.698826	0.180424	0.285245	-0.0375873	0.825197	-0.19558	0.246017	-0.0290128	0.864651	-0.0663336	0.696483	-0.127846	0.450807	0.183342	0.277397	-0.233347	0.164543	-0.0357362	0.833682	0.0477166	0.779135	0.510959	0.0012309
black	ENSMUSG00000028358	72701	Zfp618	zinc finger protein 618	-0.0874648	0.606724	-0.130144	0.442642	-0.0598382	0.724985	0.160587	0.342382	-0.036613	0.829661	-0.0622517	0.714349	0.159889	0.344513	-0.190205	0.259492	-0.283562	0.0889902	-0.120441	0.477666	0.208442	0.215701	0.337762	0.0409012	0.308732	0.0629994	0.306838	0.0647179	0.0133996	0.937261	-0.0562659	0.74082	0.464482	0.0037781
black	ENSMUSG00000102095	NA	NA	NA	0.207075	0.218795	-0.0104905	0.950863	0.0462869	0.785596	0.163128	0.334699	-0.0320493	0.850637	0.0824558	0.627554	0.1714	0.310425	-0.199457	0.236592	-0.479758	0.00265817	-0.199574	0.236312	0.218408	0.194057	0.140973	0.405271	0.302197	0.0690847	0.159898	0.344485	-0.128137	0.449772	-0.231322	0.168342	0.756588	6.06e-08
black	ENSMUSG00000033624	319518	Pdpr	pyruvate dehydrogenase phosphatase regulatory subunit	0.105726	0.533428	0.0327903	0.847224	0.0680611	0.688969	0.204807	0.223996	0.0056697	0.973432	0.0116428	0.945474	0.128005	0.450241	-0.221736	0.187182	-0.409167	0.0119165	-0.173477	0.304507	0.186926	0.267949	0.127752	0.451144	0.313969	0.0584352	0.157869	0.350723	-0.109191	0.52002	-0.247337	0.139972	0.94049	5.57e-18
black	ENSMUSG00000008307	77036	1700109H08Rik	RIKEN cDNA 1700109H08 gene	-0.0975691	0.565634	-0.123579	0.466183	0.0179333	0.916099	-0.141068	0.404954	0.191069	0.257292	-0.319157	0.0541775	-0.120206	0.478532	-0.0626849	0.712446	-0.127919	0.450548	-0.0201681	0.905688	0.232894	0.165388	0.0520851	0.759487	0.14348	0.396885	0.0665704	0.695451	-0.160638	0.342227	-0.259235	0.121294	0.730183	2.91e-07
black	ENSMUSG00000101693	100502933	Gm19461	predicted gene, 19461	0.0800969	0.637465	0.0281108	0.868822	-0.203185	0.227764	0.273831	0.101006	-0.089173	0.599688	-0.0101778	0.952326	0.0518521	0.760531	-0.0282902	0.867992	-0.311112	0.0608918	-0.202939	0.228341	0.139571	0.410006	0.0439758	0.796069	0.195388	0.246488	0.0338394	0.842397	0.0530181	0.755309	0.0186432	0.91279	0.40414	0.0131104
black	ENSMUSG00000026415	64435	Fcamr	Fc receptor, IgA, IgM, high affinity	-0.0786508	0.643571	-0.339823	0.0396088	-0.238621	0.15494	-0.0207545	0.902959	0.313366	0.0589473	-0.0105694	0.950494	-0.0878698	0.605053	0.156323	0.355519	-0.0886735	0.601742	-0.00266024	0.987533	0.0833243	0.623922	-0.0560433	0.741811	0.0622691	0.714273	0.164654	0.330133	-0.0954034	0.574333	0.0336068	0.843466	0.423294	0.00904304
black	ENSMUSG00000033705	668880	Stard9	START domain containing 9	0.15518	0.359091	0.0833676	0.623741	0.0823948	0.62781	0.322662	0.0514433	-0.0890688	0.600116	-0.07143	0.6744	-0.0114575	0.94634	-0.0529459	0.755632	-0.419811	0.00968982	-0.00260704	0.987782	0.379693	0.0204562	0.207051	0.21885	0.246257	0.141766	0.393092	0.0160929	0.19574	0.245623	-0.172507	0.307264	0.704859	1.12e-06
black	ENSMUSG00000102976	70579	Zc3h11a	zinc finger CCCH type containing 11A	0.00024299	0.998861	-0.027904	0.869779	0.0251502	0.882536	0.0911852	0.591446	0.13066	0.440821	-0.224258	0.182087	-0.10905	0.520563	-0.0157719	0.926182	-0.367543	0.025226	-0.160491	0.342676	0.378296	0.0209631	0.0453519	0.789828	0.322164	0.0518247	0.266314	0.111104	-0.161519	0.339552	-0.249963	0.135678	0.901811	2.6e-14
black	ENSMUSG00000086796	73326	4932702P03Rik	RIKEN cDNA 4932702P03 gene	-0.00715872	0.966458	-0.0208169	0.902668	-0.164465	0.330699	0.102092	0.547667	0.0523259	0.758408	-0.12497	0.461141	-0.0223708	0.895441	-0.0574451	0.735581	-0.093918	0.580334	0.0194817	0.908884	0.0552626	0.745287	0.0444337	0.793991	0.140642	0.406389	-0.0341985	0.840745	-0.0124632	0.941638	-0.072059	0.671693	0.424389	0.0088473
black	ENSMUSG00000092364	NA	NA	NA	-0.053015	0.755323	0.058297	0.731804	-0.23474	0.161967	-0.0833614	0.623767	0.00996984	0.953299	0.00452775	0.978782	-0.053479	0.753248	0.0681048	0.688779	0.0672196	0.692626	-0.122968	0.46841	0.0333054	0.844853	-0.147742	0.382859	0.28355	0.0890044	0.212918	0.205783	-0.0854526	0.615056	-0.192679	0.253231	0.387056	0.0179504
black	ENSMUSG00000072653	232785	Zfp783	zinc finger protein 783	-0.161143	0.340691	0.0166333	0.922162	-0.183077	0.278103	-0.443312	0.0059953	0.153324	0.364938	0.100348	0.554562	0.119131	0.482505	0.0450704	0.791104	0.423438	0.00901708	0.151122	0.371948	-0.25632	0.125688	0.145684	0.389598	0.187371	0.266789	0.00361027	0.983081	-0.0631092	0.710583	0.204901	0.223778	0.463038	0.00390257
black	ENSMUSG00000108064	NA	NA	NA	0.023128	0.891923	-0.0694958	0.682751	-0.0707592	0.677292	0.0549283	0.746777	0.0101128	0.95263	-0.0301784	0.859267	0.162252	0.337337	-0.125664	0.458638	-0.284259	0.0881737	0.0339706	0.841793	0.0701317	0.680001	-0.0666912	0.694925	0.27406	0.100709	0.102291	0.546882	0.00177114	0.991699	-0.104838	0.536889	0.816854	7.02e-10
black	ENSMUSG00000109108	NA	NA	NA	-0.0449417	0.791687	-0.201499	0.23173	-0.109388	0.519261	0.0397173	0.815458	0.262201	0.116942	-0.0100549	0.952901	0.0986435	0.561341	-0.163593	0.333303	-0.193092	0.252195	-0.0203151	0.905004	-0.11545	0.49623	-0.156891	0.353753	0.0610477	0.719649	-0.19584	0.245376	-0.0494628	0.771264	-0.154687	0.360638	0.587519	0.000131787
black	ENSMUSG00000034584	320051	Exph5	exophilin 5	-0.00588021	0.972446	-0.176064	0.297241	-0.136309	0.421142	0.149283	0.377861	0.029432	0.862714	-0.145196	0.391203	0.148973	0.378864	-0.259231	0.121301	-0.384329	0.0188468	-0.0619849	0.715523	0.0387286	0.819975	-0.0533322	0.753904	0.282514	0.0902293	-0.0195572	0.908533	-0.167047	0.323054	-0.27756	0.0962638	0.809953	1.26e-09
black	ENSMUSG00000071793	381598	2610005L07Rik	cadherin 11 pseudogene	0.179471	0.287841	0.0560985	0.741565	0.107207	0.527676	0.166142	0.325723	-0.23422	0.162926	0.00586077	0.972537	0.319237	0.054114	-0.243576	0.146294	-0.271824	0.103631	-0.0450051	0.7914	-0.102003	0.548016	-0.0207271	0.903086	0.269148	0.107212	0.083142	0.624683	-0.0320717	0.850534	0.0213468	0.900203	0.559252	0.000320383
black	ENSMUSG00000033904	101565	Ccp110	centriolar coiled coil protein 110	-0.238571	0.155029	-0.220732	0.189237	0.00318495	0.985074	-0.175279	0.299434	0.354282	0.0314469	-0.398051	0.0146902	-0.524275	0.000866245	0.173534	0.304346	-0.155509	0.358062	0.155568	0.357877	0.69969	1.44e-06	0.267024	0.110119	0.0281649	0.868572	0.250746	0.134416	0.0370598	0.827613	-0.534286	0.000658803	0.636191	2.32e-05
black	ENSMUSG00000030022	101401	Adamts9	a disintegrin-like and metallopeptidase (reprolysin type) with thrombospondin type 1 motif, 9	-0.178286	0.291088	0.0391238	0.818169	-0.00772067	0.963827	-0.0801555	0.637218	0.118716	0.48404	-0.288437	0.0834004	-0.242084	0.148859	0.119901	0.479659	-0.0638717	0.70724	0.200504	0.234091	0.419209	0.0098055	0.174453	0.301753	0.238899	0.154444	0.444706	0.00582079	0.259883	0.120334	-0.260028	0.120118	0.544993	0.000486932
black	ENSMUSG00000022383	19013	Ppara	peroxisome proliferator activated receptor alpha	0.475896	0.00290969	0.350469	0.0334517	0.225676	0.179266	0.438869	0.00658168	-0.319932	0.0535633	0.495622	0.00181339	0.543163	0.000513119	-0.427087	0.00838081	-0.355188	0.0309851	-0.356393	0.0303797	-0.298157	0.0730713	-0.0645129	0.704433	0.303589	0.067751	0.13042	0.441667	-0.135172	0.425064	-0.00266877	0.987493	0.599132	8.93e-05
black	ENSMUSG00000025262	207375	Fam120c	family with sequence similarity 120, member C	0.0759294	0.655125	0.000775814	0.996364	-0.0764975	0.652706	0.117301	0.489305	-0.000310404	0.998545	0.0101337	0.952533	-0.0160128	0.925058	0.00695387	0.967418	-0.301861	0.0694094	-0.176633	0.295658	0.2815	0.0914396	0.0998812	0.556415	0.322403	0.0516417	0.278816	0.0947052	-0.149997	0.375561	-0.16369	0.333011	0.804277	2.01e-09
black	ENSMUSG00000108923	NA	NA	NA	0.276483	0.0976149	0.0139996	0.934458	0.0270677	0.87365	0.369482	0.0244085	-0.109858	0.517459	0.0851001	0.616521	0.218432	0.194007	-0.229432	0.171945	-0.446068	0.00565461	-0.181716	0.281753	0.123804	0.465366	0.104846	0.536858	0.317621	0.0554116	0.247198	0.140202	0.0157015	0.92651	-0.109974	0.517012	0.705134	1.1e-06
black	ENSMUSG00000057359	NA	NA	NA	0.121823	0.47259	-0.038323	0.82183	-0.0579483	0.733349	0.214749	0.20182	0.0902119	0.595427	0.154022	0.362733	0.243571	0.146303	-0.357304	0.0299288	-0.215533	0.200137	-0.0480889	0.777455	-0.163011	0.335049	0.0748937	0.659543	-0.0494969	0.77111	-0.255295	0.12726	-0.165356	0.328048	-0.158757	0.347984	0.534005	0.000663972
black	ENSMUSG00000002265	18616	Peg3	paternally expressed 3	-0.17137	0.31051	-0.0883596	0.603034	-0.0885276	0.602342	-0.0810318	0.633529	0.0500275	0.768723	-0.259554	0.120821	-0.29054	0.0810749	0.305442	0.066008	-0.0610594	0.719597	-0.0297175	0.861395	0.437205	0.00681366	-0.0159341	0.925425	0.372021	0.023371	0.466319	0.00362472	-0.0287933	0.865666	-0.112742	0.506455	0.538242	0.000589868
black	ENSMUSG00000097131	NA	NA	NA	-0.01873	0.912386	-0.0491922	0.772482	-0.065982	0.698016	0.00882048	0.958678	0.110771	0.513962	-0.184982	0.273047	-0.0317839	0.85186	-0.0114123	0.946552	-0.259679	0.120635	-0.0768205	0.651333	0.0421174	0.804516	-0.378359	0.0209401	0.357884	0.0296444	0.0538693	0.751503	-0.219609	0.191555	-0.255143	0.127495	0.759163	5.14e-08
black	ENSMUSG00000078870	NA	NA	NA	0.0418934	0.805536	-0.0863642	0.611275	-0.0325663	0.848256	0.0499505	0.76907	0.0902481	0.595279	-0.30637	0.0651482	-0.26885	0.107616	0.0997112	0.55709	-0.387711	0.0177407	-0.315137	0.0574545	0.560581	0.000307822	0.228104	0.174508	0.378908	0.02074	0.297703	0.0735301	-0.261775	0.11756	-0.290737	0.08086	0.521111	0.000942877
black	ENSMUSG00000113491	NA	NA	NA	0.0631673	0.710328	0.232552	0.166028	0.123588	0.466152	-0.0674165	0.691769	0.074257	0.662265	-0.015765	0.926214	-0.178798	0.289682	0.156833	0.353931	0.0991136	0.559468	0.00749353	0.96489	0.264024	0.114327	0.149704	0.376502	0.191667	0.255778	0.251898	0.132578	0.0581704	0.732364	0.00551389	0.974162	0.4151	0.0106273
black	ENSMUSG00000074519	626848	Zfp971	zinc finger protein 971	0.0994046	0.55831	-0.0369876	0.827944	0.00685009	0.967904	0.230335	0.170218	0.0232409	0.891398	-0.120514	0.477397	-0.0283369	0.867776	-0.0983085	0.562678	-0.485679	0.00230945	-0.104289	0.539037	0.290846	0.0807408	-0.0462071	0.785957	0.198907	0.237914	0.185724	0.271092	-0.0182642	0.914557	-0.312382	0.0597895	0.818236	6.22e-10
blue	ENSMUSG00000037953	333424	A4gnt	alpha-1,4-N-acetylglucosaminyltransferase	0.713091	7.32e-07	0.507013	0.00136229	0.562272	0.000292485	0.704215	1.15e-06	-0.657953	9.62e-06	0.248827	0.137523	0.383962	0.0189703	-0.560588	0.000307755	-0.629297	3.02e-05	-0.296463	0.0747951	0.00520085	0.975629	0.0264103	0.876695	-0.138336	0.414203	0.0685888	0.68668	0.0650475	0.702095	-0.317511	0.0555008	-0.136989	0.418807
blue	ENSMUSG00000110588	NA	NA	NA	-0.13653	0.420383	-0.0564411	0.740041	0.0182647	0.914554	-0.496839	0.00175962	0.137929	0.41559	-0.0586447	0.730263	-0.0995781	0.55762	0.223024	0.184567	0.359445	0.0288901	0.275855	0.0984103	-0.0554872	0.744286	-0.0414549	0.807533	-0.0552207	0.745474	0.0790514	0.641877	0.0476023	0.779651	0.129751	0.444033	0.0709477	0.676479
blue	ENSMUSG00000061780	11537	Cfd	complement factor D (adipsin)	0.681128	3.48e-06	0.509906	0.00126482	0.209463	0.21341	0.639248	2.06e-05	-0.625194	3.52e-05	0.473528	0.00307395	0.39124	0.0166449	-0.202158	0.230174	-0.194711	0.248162	-0.395938	0.0152749	-0.164139	0.331671	0.186099	0.270109	0.0761212	0.654308	0.233632	0.164013	0.0503569	0.767243	0.322079	0.0518906	-0.113161	0.504866
blue	ENSMUSG00000031762	17750	Mt2	metallothionein 2	-0.215663	0.19986	-0.0446324	0.79309	-0.117065	0.490185	-0.589548	0.000123252	0.0787056	0.643339	-0.0201739	0.905661	-0.0639549	0.706875	0.329617	0.0463458	0.450386	0.00515445	0.223481	0.183646	-0.175152	0.299791	-0.133481	0.430931	0.0750776	0.658758	-0.0216928	0.898594	0.00635596	0.970218	0.257048	0.124579	-0.0182	0.914856
blue	ENSMUSG00000021228	171281	Acot3	acyl-CoA thioesterase 3	0.726309	3.61e-07	0.544748	0.000490367	0.46954	0.0033688	0.874438	1.54e-12	-0.777566	1.5e-08	0.470004	0.00333327	0.522182	0.000916295	-0.477891	0.00277725	-0.668616	6.1e-06	-0.406562	0.012523	-0.0666388	0.695153	0.013484	0.936867	0.0586457	0.730259	0.228152	0.174415	0.126002	0.457421	-0.103077	0.543788	-0.0467993	0.783278
blue	ENSMUSG00000028715	13119	Cyp4a14	cytochrome P450, family 4, subfamily a, polypeptide 14	0.460525	0.00412779	0.381822	0.0197034	0.341364	0.0386644	0.641893	1.85e-05	-0.553008	0.000385732	0.0775035	0.648432	0.0206277	0.903549	-0.0649916	0.70234	-0.473731	0.00305949	-0.11656	0.492069	0.300225	0.0710081	-0.0230186	0.892431	-0.0378963	0.823783	0.319878	0.0536054	0.287879	0.0840261	-0.160213	0.343522	-0.0221517	0.89646
blue	ENSMUSG00000099568	NA	NA	NA	0.493682	0.00190208	0.434079	0.00726838	0.524123	0.000869793	0.66865	6.09e-06	-0.651513	1.26e-05	0.100654	0.55335	0.270748	0.105059	-0.246662	0.141091	-0.623269	3.78e-05	-0.28542	0.0868273	0.17218	0.308195	-0.127568	0.451801	0.132165	0.435528	0.391847	0.0164622	0.209543	0.213232	-0.111173	0.512425	-0.0331356	0.845635
blue	ENSMUSG00000026475	19734	Rgs16	regulator of G-protein signaling 16	0.443433	0.00597998	0.36229	0.027556	0.403164	0.0133534	0.699267	1.47e-06	-0.603792	7.6e-05	-0.0586931	0.730049	0.177068	0.294451	-0.22445	0.181704	-0.736083	2.08e-07	-0.308758	0.0629762	0.235569	0.160446	-0.281247	0.0917443	0.139113	0.411559	0.314048	0.0583688	0.161365	0.340019	-0.214409	0.202551	0.0343842	0.839892
blue	ENSMUSG00000079845	434794	Xlr4a	X-linked lymphocyte-regulated 4A	0.362697	0.0273691	0.333992	0.0433525	0.458205	0.00434548	0.235445	0.160673	-0.177103	0.294354	0.26204	0.117175	0.127241	0.452971	-0.139331	0.41082	-0.0621061	0.71499	-0.0491559	0.772646	-0.00925906	0.956625	0.1034	0.542521	-0.0719119	0.672326	0.148807	0.379402	0.154942	0.359838	0.104013	0.540117	0.0786946	0.643386
blue	ENSMUSG00000061322	68922	Dnaic1	dynein, axonemal, intermediate chain 1	-0.848079	3.47e-11	-0.57892	0.000174172	-0.551801	0.000399655	-0.844931	4.83e-11	0.703945	1.17e-06	-0.446691	0.00558002	-0.491033	0.00202934	0.528198	0.000778914	0.572928	0.000210571	0.337363	0.0411553	0.0795527	0.63976	-0.162231	0.3374	0.139641	0.409768	-0.0802914	0.636645	-0.161533	0.339509	0.0242081	0.886907	0.0506577	0.765891
blue	ENSMUSG00000038973	74276	Cldnd2	claudin domain containing 2	-0.546472	0.000466652	-0.404776	0.0129539	-0.457151	0.00444771	-0.66767	6.35e-06	0.415726	0.0104984	-0.146349	0.387413	-0.236209	0.15928	0.33438	0.0430951	0.533573	0.000671962	0.306439	0.0650841	-0.0274981	0.871657	0.0436266	0.797655	-0.0224887	0.894893	-0.0691063	0.684437	0.00306588	0.985632	0.0706641	0.677703	-0.101042	0.551812
blue	ENSMUSG00000104149	NA	NA	NA	0.772058	2.2e-08	0.526432	0.000817217	0.450267	0.00516776	0.735011	2.21e-07	-0.690533	2.25e-06	0.608195	6.52e-05	0.714756	6.71e-07	-0.648927	1.4e-05	-0.354701	0.0312326	-0.105437	0.534554	-0.466936	0.00357445	0.0354643	0.834931	-0.227535	0.175615	-0.0772883	0.649345	0.238091	0.155886	0.038587	0.820623	-0.102754	0.545058
blue	ENSMUSG00000074469	100038554	Gm15348	predicted gene 15348	-0.324064	0.0503812	-0.145088	0.391559	-0.15969	0.345121	-0.738951	1.76e-07	0.434389	0.00722224	-0.174613	0.301303	-0.283934	0.0885542	0.288919	0.0828637	0.601738	8.16e-05	0.30694	0.0646242	-0.107139	0.527939	-0.100553	0.553749	-0.0988659	0.560455	-0.143277	0.397561	-0.145006	0.39183	-0.0202686	0.90522	0.0636488	0.708217
blue	ENSMUSG00000089694	100043497	Nat8f7	N-acetyltransferase 8 (GCN5-related) family member 7	0.700166	1.41e-06	0.451276	0.00505631	0.362941	0.027258	0.88219	5.37e-13	-0.623329	3.77e-05	0.40696	0.0124286	0.600194	8.61e-05	-0.62532	3.5e-05	-0.62533	3.5e-05	-0.339722	0.0396712	-0.220516	0.189681	0.082789	0.62616	-0.0596642	0.725754	-0.0992382	0.558972	0.167066	0.322999	-0.0318422	0.851592	-0.0255531	0.880668
blue	ENSMUSG00000095061	381994	E030018B13Rik	RIKEN cDNA E030018B13 gene	-0.248566	0.137949	-0.2656	0.112102	-0.0445019	0.793682	-0.275521	0.0988352	0.258302	0.122688	-0.0193502	0.909497	-0.0325412	0.848371	0.0449744	0.791539	-0.159935	0.344373	-0.0885241	0.602357	0.111333	0.511817	-0.213212	0.205144	0.151446	0.37091	-0.0780219	0.646234	-0.221614	0.187431	-0.236918	0.157996	0.294469	0.0768654
blue	ENSMUSG00000053303	236149	Slc22a26	solute carrier family 22 (organic cation transporter), member 26	0.445773	0.00569021	0.363996	0.0267807	0.309712	0.0621243	0.648843	1.4e-05	-0.673558	4.9e-06	0.039966	0.814322	0.176569	0.295835	-0.254234	0.128903	-0.633859	2.53e-05	-0.204814	0.223979	0.256329	0.125674	-0.00888855	0.95836	0.0278319	0.870112	0.287005	0.0850138	0.170847	0.312013	-0.285619	0.0865972	-0.0640749	0.70635
blue	ENSMUSG00000100009	666182	Gm7967	predicted gene 7967	0.295185	0.0761173	0.211257	0.209425	0.14376	0.395957	0.229474	0.171864	-0.150484	0.373993	0.143454	0.396971	-0.00579567	0.972842	0.00703446	0.96704	-0.26292	0.115905	-0.152505	0.367537	0.254122	0.129077	0.216734	0.197583	-0.0354309	0.835084	0.196858	0.242884	0.0788527	0.642717	-0.0266187	0.875729	0.272252	0.103067
blue	ENSMUSG00000087054	NA	NA	NA	-0.651369	1.26e-05	-0.660802	8.53e-06	-0.564079	0.00027685	-0.615422	5.04e-05	0.686976	2.66e-06	-0.169535	0.315797	-0.181742	0.281682	0.239045	0.154186	0.480536	0.00260987	0.200526	0.234039	-0.199007	0.237673	-0.102549	0.545867	0.0468513	0.783043	-0.241862	0.149244	-0.215129	0.201004	0.110362	0.515529	0.0146015	0.931646
blue	ENSMUSG00000032360	387285	Hcrtr2	hypocretin (orexin) receptor 2	-0.226007	0.178611	-0.168953	0.317487	-0.162234	0.337388	-0.3214	0.0524149	0.323934	0.0504793	0.133685	0.430219	0.0943111	0.578743	-0.0427476	0.801649	0.178465	0.290596	0.322311	0.0517118	-0.211145	0.209673	0.0174041	0.918567	-0.174254	0.302314	-0.276899	0.0970908	0.164648	0.330153	0.0104086	0.951246	0.113324	0.504247
blue	ENSMUSG00000049109	210757	Themis	thymocyte selection associated	0.845536	4.54e-11	0.572823	0.000211268	0.435412	0.00707145	0.650298	1.32e-05	-0.616016	4.93e-05	0.816368	7.32e-10	0.733711	2.39e-07	-0.644927	1.64e-05	-0.321681	0.0521975	-0.31604	0.0567052	-0.410853	0.0115373	0.296832	0.0744175	-0.151434	0.37095	-0.0180764	0.915432	0.0790904	0.641712	0.0692953	0.683619	-0.0562221	0.741015
blue	ENSMUSG00000022032	71145	Scara5	scavenger receptor class A, member 5	-0.654971	1.09e-05	-0.521999	0.000920789	-0.358163	0.0295081	-0.84104	7.22e-11	0.630189	2.92e-05	-0.365321	0.0261907	-0.471541	0.00321788	0.512889	0.00117082	0.513334	0.00115733	0.24105	0.150656	0.165073	0.328888	-0.180087	0.286161	0.099037	0.559773	-0.105533	0.534177	-0.234365	0.162657	0.0545648	0.748398	0.0970133	0.567861
blue	ENSMUSG00000031765	17748	Mt1	metallothionein 1	-0.181448	0.282475	0.00362455	0.983014	-0.0478672	0.778455	-0.508013	0.00132786	-0.00510233	0.97609	-0.00499844	0.976577	-0.0164829	0.922864	0.312082	0.0600488	0.349699	0.0338693	0.164953	0.329245	-0.167933	0.320458	-0.197597	0.241082	0.015262	0.928562	-0.106413	0.530757	0.0355903	0.834352	0.290749	0.0808469	-0.0765324	0.652558
blue	ENSMUSG00000084923	NA	NA	NA	-0.550865	0.000410754	-0.331639	0.0449427	-0.45183	0.00499597	-0.753547	7.33e-08	0.689133	2.4e-06	-0.109596	0.518462	-0.452585	0.00491474	0.467156	0.0035567	0.640662	1.94e-05	0.338269	0.0405799	0.0580239	0.733014	0.109355	0.519391	-0.118173	0.486056	-0.205759	0.221803	-0.0953947	0.574368	0.0425801	0.802411	0.0937109	0.581172
blue	ENSMUSG00000113581	353504	Dio3os	deiodinase, iodothyronine type III, opposite strand	0.184491	0.274344	0.0887172	0.601562	0.124004	0.464641	0.528646	0.00076946	-0.514262	0.00112967	-0.0779928	0.646357	0.180186	0.285892	-0.0543183	0.749499	-0.539839	0.000563918	-0.0320181	0.850781	0.140918	0.405457	-0.230118	0.17063	0.165772	0.326814	0.31876	0.0544941	0.308686	0.0630404	0.00591138	0.9723	0.0333585	0.844609
blue	ENSMUSG00000069170	110789	Adgrv1	adhesion G protein-coupled receptor V1	0.573712	0.000205448	0.360449	0.0284132	0.467346	0.00354138	0.54343	0.000509227	-0.26271	0.116208	0.374669	0.0223282	0.393445	0.0159897	-0.492245	0.00197022	-0.458968	0.00427286	-0.477365	0.00281168	-0.0298843	0.860625	0.179543	0.287643	0.145984	0.388609	0.235554	0.160474	-0.124783	0.461817	-0.104332	0.538868	0.177109	0.294338
blue	ENSMUSG00000118295	NA	NA	NA	-0.475739	0.00292028	-0.306673	0.0648688	-0.438645	0.00661251	-0.656586	1.02e-05	0.280143	0.0930793	-0.0767784	0.651512	-0.155443	0.358269	0.437474	0.00677565	0.542581	0.000521708	0.356611	0.0302714	-0.117086	0.490106	-0.166429	0.324875	0.0958141	0.572679	-0.201514	0.231694	0.0508313	0.765111	0.260376	0.119606	0.0123976	0.941945
blue	ENSMUSG00000114800	NA	NA	NA	0.541422	0.000539201	0.255824	0.126446	0.242815	0.147599	0.559798	0.000315168	-0.329569	0.0463794	0.458588	0.00430893	0.302274	0.0690099	-0.347667	0.0349906	-0.519371	0.000987533	-0.258915	0.12177	0.223556	0.183496	0.42935	0.00800584	-0.00971007	0.954515	0.126557	0.455423	0.144215	0.394446	-0.108852	0.521326	0.310617	0.0613257
blue	ENSMUSG00000014609	11448	Chrne	cholinergic receptor, nicotinic, epsilon polypeptide	0.646063	1.57e-05	0.462584	0.00394246	0.362994	0.0272336	0.738123	1.85e-07	-0.681231	3.47e-06	0.453795	0.0047871	0.609169	6.3e-05	-0.53904	0.00057678	-0.440482	0.00636331	-0.122487	0.470165	-0.233795	0.163711	0.111863	0.509795	-0.112013	0.509225	0.0428493	0.801187	0.326091	0.0488765	0.0551305	0.745876	-0.014901	0.930248
blue	ENSMUSG00000048138	226049	Dmrt2	doublesex and mab-3 related transcription factor 2	-0.17651	0.295999	-0.114996	0.497937	-0.216807	0.197426	-0.114613	0.499381	0.0537162	0.752187	-0.194936	0.247606	-0.110371	0.515493	0.129195	0.446004	0.151945	0.369318	-0.223138	0.184336	0.00437749	0.979486	-0.153703	0.363741	0.23391	0.163498	0.0550038	0.74644	-0.19905	0.23757	0.0425989	0.802325	-0.0256742	0.880106
blue	ENSMUSG00000066072	13117	Cyp4a10	cytochrome P450, family 4, subfamily a, polypeptide 10	0.553441	0.000380841	0.410267	0.0116678	0.389613	0.0171429	0.777386	1.52e-08	-0.623269	3.78e-05	0.282423	0.0903369	0.23201	0.167045	-0.233904	0.163509	-0.521782	0.000926156	-0.173275	0.305079	0.158429	0.348992	0.0829906	0.625316	-0.0557072	0.743307	0.287399	0.0845677	0.277803	0.0959608	-0.0764977	0.652705	-0.0396818	0.81562
blue	ENSMUSG00000026822	16819	Lcn2	lipocalin 2	-0.440291	0.0063888	-0.249808	0.135928	-0.141262	0.404302	-0.858757	1.06e-11	0.434312	0.00723363	-0.236697	0.158394	-0.29311	0.0783018	0.327737	0.0476819	0.56301	0.000286	0.348024	0.0347913	-0.0914051	0.590549	-0.170014	0.314412	-0.115562	0.49581	-0.272285	0.103024	-0.159237	0.346509	-0.0204004	0.904607	-0.00687515	0.967786
blue	ENSMUSG00000051627	50709	Hist1h1e	histone cluster 1, H1e	-0.10413	0.539659	-0.138556	0.413453	0.0469005	0.782821	-0.437101	0.0068283	0.278726	0.0948154	0.149667	0.376623	-0.0841987	0.620273	0.252244	0.132028	0.502088	0.00154346	0.271871	0.103569	-0.232326	0.166451	-0.132861	0.433095	0.0149445	0.930045	0.11297	0.505591	-0.0635631	0.708592	0.296622	0.0746326	-0.173404	0.304715
blue	ENSMUSG00000050014	328561	Apol10b	apolipoprotein L 10B	-0.463253	0.00388387	-0.274316	0.100379	-0.136365	0.420949	-0.765215	3.47e-08	0.417696	0.0101016	-0.330595	0.0456628	-0.305462	0.0659894	0.254748	0.128105	0.430723	0.00778543	0.538966	0.000577977	0.0429952	0.800523	-0.0864848	0.610776	-0.213756	0.203963	-0.325622	0.0492214	0.128784	0.447464	-0.101658	0.54938	-0.00689199	0.967707
blue	ENSMUSG00000034612	58250	Chst11	carbohydrate sulfotransferase 11	-0.00748629	0.964924	-0.0542066	0.749997	0.172828	0.306348	-0.259936	0.120255	0.21364	0.204215	-0.125993	0.457452	-0.285396	0.0868541	0.18212	0.280667	0.227553	0.175579	0.123182	0.467628	0.230046	0.170768	0.420174	0.00962067	0.0414188	0.807697	0.290348	0.081285	0.135368	0.424384	-0.0051866	0.975695	0.0397525	0.815297
blue	ENSMUSG00000086228	208080	Ubap1l	ubiquitin-associated protein 1-like	-0.0423144	0.80362	0.0500651	0.768555	-0.0793043	0.640809	0.191531	0.256122	-0.042794	0.801438	-0.196685	0.243305	-0.163298	0.334186	0.159949	0.344328	-0.0883882	0.602916	0.0120066	0.943772	0.301685	0.0695799	0.181233	0.283055	0.152281	0.368249	0.34681	0.0354731	0.175797	0.297986	0.0816402	0.630974	0.131653	0.437324
blue	ENSMUSG00000087348	NA	NA	NA	-0.263715	0.114767	-0.0847841	0.617835	-0.283473	0.089095	-0.429055	0.0080539	0.315363	0.0572659	0.00561851	0.973672	-0.314283	0.0581708	0.42565	0.00862665	0.437349	0.00679329	0.151778	0.36985	0.209675	0.212937	0.244041	0.145502	-0.111818	0.509967	-0.102639	0.54551	-0.0322784	0.849582	0.237155	0.157568	-0.0536027	0.752695
blue	ENSMUSG00000063245	NA	NA	NA	0.363021	0.0272215	0.283074	0.0895655	0.193376	0.251484	0.286606	0.0854676	-0.111221	0.512243	0.211423	0.209061	-0.0799158	0.638228	-0.064372	0.705049	0.00539442	0.974722	0.252281	0.131969	0.121294	0.47453	0.0548372	0.747183	-0.290983	0.0805921	0.116085	0.49385	0.277562	0.0962605	-0.102704	0.545256	-0.0659804	0.698023
blue	ENSMUSG00000027530	75497	Fabp12	fatty acid binding protein 12	-0.640538	1.95e-05	-0.367641	0.0251843	-0.458041	0.00436128	-0.668705	6.07e-06	0.41495	0.0106583	-0.331971	0.0447152	-0.407742	0.0122451	0.410621	0.0115888	0.442576	0.00608917	0.382904	0.0193297	0.124488	0.462884	-0.100259	0.554914	-0.101779	0.5489	-0.186227	0.269773	0.0383356	0.821773	-0.0818329	0.630165	-0.29157	0.0799548
blue	ENSMUSG00000054598	231253	9130230L23Rik	RIKEN cDNA 9130230L23 gene	0.383393	0.0191631	0.142782	0.39921	0.349886	0.0337672	0.510639	0.00124113	-0.210949	0.210107	0.20193	0.230712	0.231807	0.167427	-0.343428	0.0374287	-0.372343	0.0232423	-0.239092	0.154103	0.198337	0.23929	0.636107	2.32e-05	-0.0993029	0.558714	0.212581	0.206518	0.119758	0.480187	-0.0200232	0.906363	0.120568	0.477201
blue	ENSMUSG00000025726	434203	Slc28a1	solute carrier family 28 (sodium-coupled nucleoside transporter), member 1	0.605649	7.13e-05	0.343588	0.0373342	0.222584	0.185457	0.77556	1.73e-08	-0.53214	0.000699127	0.593499	0.00010805	0.641199	1.9e-05	-0.526353	0.000818973	-0.462157	0.00398027	-0.409944	0.0117405	-0.245847	0.142452	0.208453	0.215677	0.137848	0.415866	0.137971	0.415446	-0.0546008	0.748238	0.18222	0.280398	0.0644118	0.704875
blue	ENSMUSG00000027068	241452	Dhrs9	dehydrogenase/reductase (SDR family) member 9	-0.418422	0.00995855	-0.321516	0.0523245	-0.276241	0.0979214	-0.703988	1.17e-06	0.578279	0.000177778	-0.359781	0.0287298	-0.531418	0.000713173	0.54151	0.000537843	0.704097	1.16e-06	0.255007	0.127704	0.131867	0.436573	0.0698028	0.681423	0.0167067	0.92182	0.0357164	0.833774	-0.207033	0.218891	0.273087	0.101973	0.13842	0.413917
blue	ENSMUSG00000110093	NA	NA	NA	-0.104521	0.538127	0.0187248	0.912411	-0.0268972	0.874439	-0.272048	0.103335	0.0979094	0.564273	0.0929173	0.584392	0.0882429	0.603515	-0.0291873	0.863845	0.270168	0.105835	0.277695	0.0960944	-0.112911	0.505812	0.255281	0.127282	0.0268663	0.874582	-0.0756473	0.656327	0.234497	0.162414	0.0929368	0.584313	0.115853	0.494719
blue	ENSMUSG00000030111	232345	A2m	alpha-2-macroglobulin	-0.533374	0.000675676	-0.311215	0.0608013	-0.261046	0.118623	-0.646427	1.55e-05	0.542908	0.000516872	-0.253792	0.129593	-0.256055	0.126092	0.250938	0.134109	0.483466	0.00243482	0.425129	0.00871729	-0.168754	0.318065	-0.139496	0.41026	-0.133109	0.432228	-0.213747	0.203982	-0.0129075	0.939561	0.0769043	0.650976	-0.0661693	0.697199
blue	ENSMUSG00000006777	94179	Krt23	keratin 23	0.72314	4.29e-07	0.475986	0.00290358	0.34154	0.0385579	0.8398	8.18e-11	-0.546389	0.000467769	0.570568	0.000226684	0.538666	0.000582878	-0.486572	0.00226054	-0.430803	0.00777281	-0.227471	0.17574	-0.160241	0.343436	0.303117	0.068201	-0.159814	0.344741	0.160082	0.343924	0.295502	0.0757881	0.148323	0.380972	-0.0623209	0.714045
blue	ENSMUSG00000028039	13638	Efna3	ephrin A3	-0.558199	0.000330652	-0.525386	0.000840664	-0.272068	0.103309	-0.65015	1.33e-05	0.603169	7.77e-05	-0.401375	0.0138091	-0.274341	0.100347	0.171053	0.311418	0.486496	0.00226466	0.227097	0.17647	-0.0665898	0.695367	0.0275856	0.871252	-0.0576818	0.734531	-0.196868	0.242857	-0.224262	0.182079	0.0774065	0.648844	0.0129714	0.939263
blue	ENSMUSG00000024987	13082	Cyp26a1	cytochrome P450, family 26, subfamily a, polypeptide 1	0.172757	0.30655	0.0148527	0.930473	0.0405151	0.811817	0.359329	0.0289454	-0.0515108	0.762062	-0.100425	0.554256	-0.200347	0.234465	-0.00745837	0.965055	-0.13931	0.410891	-0.239275	0.153777	0.276156	0.0980289	0.208823	0.214844	0.0765752	0.652376	0.0784232	0.644534	-0.0701851	0.679771	-0.0597019	0.725587	-0.0225939	0.894404
blue	ENSMUSG00000074115	20208	Saa1	serum amyloid A 1	-0.49057	0.0020523	-0.327698	0.0477096	-0.202631	0.229062	-0.869003	3.09e-12	0.48038	0.00261948	-0.278429	0.0951826	-0.302187	0.069094	0.331152	0.0452774	0.56306	0.000285566	0.356238	0.0304569	-0.110746	0.514058	-0.20692	0.219148	-0.124014	0.464604	-0.321246	0.0525343	-0.17366	0.30399	-0.00695027	0.967434	-0.017381	0.918675
blue	ENSMUSG00000075044	236293	Slc22a29	solute carrier family 22. member 29	0.651255	1.27e-05	0.590779	0.000118323	0.336413	0.0417651	0.775464	1.74e-08	-0.73738	1.93e-07	0.426858	0.00841963	0.413181	0.0110305	-0.405711	0.0127267	-0.464994	0.00373478	-0.387036	0.017957	-0.0572017	0.736662	0.041579	0.806968	0.0967385	0.568963	0.272294	0.103011	0.0300296	0.859953	-0.0788121	0.642889	-0.110861	0.513618
blue	ENSMUSG00000111110	NA	NA	NA	0.348998	0.0342527	0.0538621	0.751535	0.115937	0.494405	0.370381	0.0240369	0.0696341	0.682153	0.587811	0.000130528	0.324318	0.0501907	-0.345778	0.0360604	0.072188	0.671138	0.0813445	0.632216	-0.338434	0.0404758	0.394481	0.0156892	-0.442197	0.00613805	-0.303459	0.0678743	0.15882	0.347789	0.194914	0.24766	-0.109332	0.519477
blue	ENSMUSG00000030219	69187	Erp27	endoplasmic reticulum protein 27	-0.152502	0.367545	-0.158656	0.348295	-0.162127	0.337713	-0.368431	0.024849	0.178502	0.290496	-0.0544387	0.748961	0.104273	0.539099	-0.101456	0.550175	0.084523	0.618922	0.333211	0.0438756	-0.106728	0.529533	0.102603	0.545655	-0.230386	0.17012	-0.373594	0.0227469	0.173567	0.304253	-0.0512226	0.763355	0.152597	0.367243
blue	ENSMUSG00000029752	27053	Asns	asparagine synthetase	-0.723968	4.1e-07	-0.543839	0.000503305	-0.673623	4.89e-06	-0.660473	8.65e-06	0.506216	0.00139026	-0.32982	0.0462029	-0.373957	0.0226051	0.415805	0.0104822	0.396471	0.0151257	0.0467792	0.783369	0.050383	0.767125	-0.218745	0.193352	0.163122	0.334716	-0.216487	0.198106	-0.341551	0.0385515	-0.0748705	0.659642	0.0542427	0.749836
blue	ENSMUSG00000012187	68393	Mogat1	monoacylglycerol O-acyltransferase 1	0.789141	6.52e-09	0.6147	5.17e-05	0.481998	0.00252117	0.719075	5.34e-07	-0.566667	0.000255757	0.752918	7.62e-08	0.537862	0.00059621	-0.481303	0.00256303	-0.222969	0.184678	-0.174539	0.301512	-0.267936	0.108863	0.29244	0.0790176	-0.131601	0.437508	0.13304	0.432468	0.248451	0.138139	0.110862	0.513616	-0.154632	0.360813
blue	ENSMUSG00000094257	NA	NA	NA	0.0330146	0.846192	-0.00661734	0.968994	0.086162	0.612113	0.23964	0.153133	-0.189953	0.260135	-0.0449423	0.791684	0.0627729	0.71206	0.0951357	0.575412	-0.308717	0.0630124	-0.126738	0.454775	0.122902	0.468649	-0.186326	0.269516	0.230548	0.169811	0.327933	0.0475411	-0.0356373	0.834136	0.103919	0.540486	-0.0462748	0.78565
blue	ENSMUSG00000113669	NA	NA	NA	-0.454481	0.00471595	-0.286473	0.0856189	-0.200054	0.235165	-0.736053	2.09e-07	0.48346	0.00243518	-0.300032	0.071199	-0.439458	0.00650113	0.396174	0.0152087	0.494236	0.00187638	0.678924	3.85e-06	0.162865	0.335489	-0.00884144	0.95858	-0.283898	0.0885962	-0.160826	0.341657	0.218634	0.193584	-0.0988086	0.560683	0.134266	0.428199
blue	ENSMUSG00000056617	74361	4931429L15Rik	RIKEN cDNA 4931429L15 gene	0.266945	0.110229	0.205508	0.222378	0.16407	0.331877	0.199367	0.236808	-0.186908	0.267995	-0.0609171	0.720224	-0.0269732	0.874087	0.038288	0.821991	-0.23485	0.161763	-0.156614	0.354612	0.313241	0.059054	0.245986	0.14222	0.0293841	0.862935	0.267419	0.109573	0.150021	0.375483	0.0786127	0.643732	0.126716	0.454855
blue	ENSMUSG00000028445	69638	Enho	energy homeostasis associated	-0.758956	5.21e-08	-0.620064	4.26e-05	-0.613145	5.47e-05	-0.745736	1.18e-07	0.706715	1.02e-06	-0.293305	0.0780948	-0.360019	0.0286167	0.542026	0.000530017	0.624348	3.63e-05	0.250323	0.135096	-0.0873986	0.606997	-0.117301	0.489303	0.0434293	0.79855	-0.235935	0.159778	-0.184151	0.275244	0.379045	0.0206903	-0.0403325	0.81265
blue	ENSMUSG00000029651	77521	Mtus2	microtubule associated tumor suppressor candidate 2	-0.379538	0.0205121	-0.126007	0.457403	-0.317415	0.0555788	-0.29953	0.0716962	0.158363	0.349196	-0.371662	0.0235157	-0.245683	0.142726	0.309955	0.0619089	0.263916	0.114482	-0.155617	0.357724	0.0268552	0.874634	-0.253285	0.130387	0.341846	0.0383732	0.0916447	0.589572	-0.277072	0.0968736	0.0963911	0.570358	0.135065	0.425431
blue	ENSMUSG00000087684	NA	NA	NA	-0.54437	0.000495715	-0.341528	0.0385649	-0.114465	0.499938	-0.794389	4.39e-09	0.568428	0.000242243	-0.220922	0.188846	-0.398476	0.0145752	0.467748	0.00350915	0.553006	0.000385756	0.205972	0.221313	0.0750592	0.658836	-0.130735	0.440557	0.00436616	0.979539	0.00442625	0.979257	-0.204712	0.224214	0.0747737	0.660056	-0.0824703	0.627494
blue	ENSMUSG00000024029	21786	Tff3	trefoil factor 3, intestinal	-0.454932	0.00466968	-0.132101	0.435753	-0.427194	0.0083627	-0.568602	0.000240946	0.183142	0.277928	-0.0578797	0.733653	0.000808486	0.996211	0.269827	0.106294	0.407068	0.0124032	0.0207954	0.902769	-0.19118	0.257011	-0.192085	0.254723	0.334561	0.0429752	0.0127166	0.940453	-0.203474	0.227091	0.198366	0.23922	0.0388799	0.819284
blue	ENSMUSG00000087613	NA	NA	NA	0.463564	0.00385685	0.332503	0.0443535	0.406857	0.0124531	0.346338	0.0357408	-0.245758	0.142601	0.399398	0.0143277	0.244137	0.145337	-0.267172	0.109915	-0.0418481	0.805742	0.182486	0.279684	-0.279793	0.0935058	-0.0548407	0.747168	-0.312872	0.0593688	-0.188793	0.26311	0.228065	0.174583	0.0142272	0.933395	-0.131567	0.437626
blue	ENSMUSG00000056071	20202	S100a9	S100 calcium binding protein A9 (calgranulin B)	-0.398862	0.014471	-0.262517	0.116486	-0.220735	0.189232	-0.723929	4.11e-07	0.603858	7.59e-05	-0.289727	0.081968	-0.581578	0.000159924	0.49746	0.00173274	0.518991	0.000997532	0.290256	0.081386	0.214085	0.20325	-0.0870352	0.608499	-0.121596	0.473424	-0.0526281	0.757054	-0.185911	0.270601	-0.0908287	0.592903	0.00074686	0.9965
blue	ENSMUSG00000046159	12671	Chrm3	cholinergic receptor, muscarinic 3, cardiac	-0.448474	0.00537097	-0.408723	0.012018	-0.268656	0.10788	-0.77358	1.98e-08	0.553051	0.000385244	-0.187994	0.265174	-0.347138	0.0352875	0.292004	0.0794868	0.632129	2.71e-05	0.359486	0.0288703	-0.0216356	0.89886	-0.00147367	0.993093	-0.0926064	0.585656	-0.104536	0.538072	-0.16278	0.335743	-0.00691859	0.967583	-0.0594793	0.726571
blue	ENSMUSG00000036449	78076	Lcn8	lipocalin 8	0.300106	0.0711262	0.284211	0.0882295	0.125345	0.459788	0.383895	0.0189929	-0.168458	0.318927	0.17757	0.293062	0.17706	0.294473	-0.0506504	0.765924	-0.263692	0.1148	-0.489413	0.00211077	0.0436148	0.797708	0.0417352	0.806256	0.496967	0.00175408	0.374205	0.0225083	-0.115427	0.496319	0.191843	0.255335	0.229697	0.171436
blue	ENSMUSG00000000903	22364	Vpreb3	pre-B lymphocyte gene 3	0.180235	0.285759	0.00280612	0.986849	0.116991	0.490459	0.463845	0.00383262	-0.305699	0.0657684	-0.0459233	0.787241	-0.00239091	0.988795	0.0832643	0.624172	-0.572076	0.000216264	-0.304316	0.067063	0.381196	0.0199223	-0.106342	0.531032	0.171143	0.311161	0.234139	0.163075	0.00952118	0.955399	0.0063082	0.970441	0.0841209	0.620597
blue	ENSMUSG00000029822	71720	Osbpl3	oxysterol binding protein-like 3	0.61873	4.47e-05	0.495238	0.00183067	0.115206	0.497147	0.692356	2.06e-06	-0.690215	2.28e-06	0.578584	0.000176053	0.613933	5.32e-05	-0.461243	0.00406227	-0.473123	0.0031028	-0.525147	0.000846107	-0.197137	0.242203	0.0970329	0.567782	0.201155	0.232543	0.193159	0.252027	-0.129158	0.446136	0.0366691	0.829404	0.107338	0.527168
blue	ENSMUSG00000093916	NA	NA	NA	-0.514744	0.00111553	-0.319781	0.053682	-0.188844	0.26298	-0.757384	5.76e-08	0.386338	0.0181831	-0.275278	0.0991451	-0.168276	0.319457	0.130585	0.441084	0.556164	0.00035135	0.396785	0.0150383	-0.168741	0.318102	0.0108163	0.949339	-0.197922	0.240295	-0.331361	0.0451336	0.0385298	0.820885	-0.0050195	0.976478	-0.213418	0.204696
blue	ENSMUSG00000091285	NA	NA	NA	0.236472	0.158802	0.00418047	0.980409	0.0705898	0.678023	0.584502	0.000145463	-0.17136	0.31054	0.20296	0.228291	0.322872	0.0512832	-0.317345	0.0556354	-0.4597	0.00420405	-0.364483	0.0265627	-0.0557761	0.743	-0.073033	0.667509	0.201938	0.230691	0.224887	0.180832	-0.114457	0.499966	-0.0160452	0.924907	0.157545	0.351724
blue	ENSMUSG00000066392	18191	Nrxn3	neurexin III	0.0286237	0.86645	-0.000256144	0.9988	0.176951	0.294775	0.16752	0.321668	-0.114707	0.499024	-0.0999454	0.55616	0.0142208	0.933424	-0.013629	0.93619	-0.148584	0.380124	0.046276	0.785645	0.170323	0.313521	0.159768	0.344882	0.119342	0.481722	0.314483	0.0580022	0.220415	0.18989	-0.0119656	0.943964	0.210312	0.211518
blue	ENSMUSG00000086241	74953	4930483K19Rik	RIKEN cDNA 4930483K19 gene	-0.310263	0.061637	-0.0890703	0.60011	-0.364698	0.0264667	-0.316641	0.0562105	0.148003	0.382011	-0.0414733	0.807449	-0.171544	0.310012	0.427372	0.00833278	0.278043	0.095662	0.196306	0.244232	0.12668	0.454984	-0.11377	0.502562	0.299844	0.0713849	0.191853	0.255308	0.216078	0.198975	0.258364	0.122595	0.286274	0.0858467
blue	ENSMUSG00000024924	22359	Vldlr	very low density lipoprotein receptor	0.509295	0.00128486	0.411224	0.0114551	0.492226	0.00197112	0.672177	5.21e-06	-0.642889	1.78e-05	-0.00198773	0.990684	0.199007	0.237674	-0.293057	0.0783584	-0.589041	0.000125341	-0.224176	0.182251	0.182935	0.278483	0.0400108	0.814118	-0.0079918	0.962558	0.302559	0.0687354	0.236366	0.158995	-0.209367	0.213625	0.0210375	0.901642
blue	ENSMUSG00000069270	319164	Hist1h2ac	histone cluster 1, H2ac	-0.078308	0.645022	-0.0792683	0.640961	0.108674	0.522009	-0.303684	0.067661	0.162439	0.336772	-0.0466102	0.784133	-0.157444	0.352036	0.152087	0.368866	0.210445	0.211223	0.397935	0.014722	0.0520967	0.759434	0.0933136	0.582783	-0.415263	0.0105935	-0.100666	0.553303	0.246364	0.141587	-0.00557297	0.973885	-0.103703	0.54133
blue	ENSMUSG00000109587	NA	NA	NA	0.334135	0.0432578	0.229885	0.171077	0.192365	0.254018	0.516111	0.00107627	-0.418151	0.0100117	0.384444	0.0188081	0.585131	0.000142512	-0.318998	0.0543037	-0.489811	0.00209052	-0.419297	0.00978859	-0.238334	0.155452	-0.103181	0.543381	0.198983	0.237733	-0.00775418	0.96367	-0.0708879	0.676737	0.323609	0.0507242	0.0376341	0.824983
blue	ENSMUSG00000021763	408066	BC067074	cDNA sequence BC067074	0.0856899	0.614071	0.140233	0.407766	0.206412	0.220307	0.321451	0.0523752	-0.274033	0.100744	0.217762	0.195412	0.168912	0.317604	-0.0506526	0.765914	-0.251244	0.133619	-0.0405485	0.811665	0.111024	0.512995	-0.0498898	0.769343	0.292792	0.078641	0.416008	0.0104407	0.123062	0.468065	0.0581211	0.732583	0.187131	0.267415
blue	ENSMUSG00000037386	116838	Rims2	regulating synaptic membrane exocytosis 2	-0.272099	0.103268	-0.0721368	0.671359	0.0515071	0.762078	-0.440841	0.00631555	0.348915	0.0342983	-0.120343	0.478028	-0.372403	0.0232182	0.369459	0.0244182	0.371555	0.0235588	-0.0559172	0.742372	0.216797	0.197449	0.0992813	0.5588	0.107221	0.527624	0.241451	0.149957	-0.207075	0.218795	0.0187903	0.912105	0.0146228	0.931547
blue	ENSMUSG00000020218	24117	Wif1	Wnt inhibitory factor 1	-0.505345	0.00142141	-0.431253	0.00770178	-0.134651	0.426867	-0.612599	5.58e-05	0.578359	0.000177323	-0.284031	0.0884402	-0.101847	0.54863	0.143718	0.396095	0.373543	0.0227669	0.445016	0.00578262	-0.201709	0.231234	-0.13062	0.44096	-0.102848	0.544689	-0.266993	0.110161	0.0285344	0.866863	0.102161	0.547394	0.137721	0.416302
blue	ENSMUSG00000034591	338365	Slc41a2	solute carrier family 41, member 2	-0.601102	8.35e-05	-0.549271	0.000430312	-0.315848	0.0568638	-0.891429	1.39e-13	0.774244	1.89e-08	-0.3945	0.0156838	-0.552472	0.000391856	0.469803	0.00334869	0.689614	2.35e-06	0.311827	0.0602692	0.075787	0.655732	-0.0345675	0.839049	-0.0742445	0.662318	-0.161387	0.339953	-0.2588	0.121942	0.00330594	0.984507	0.0422128	0.804082
blue	ENSMUSG00000006542	241113	Prkag3	protein kinase, AMP-activated, gamma 3 non-catalytic subunit	0.0905304	0.594123	0.108859	0.521299	0.208952	0.214556	0.395495	0.0153997	-0.322445	0.0516092	-0.159597	0.345407	0.0198011	0.907397	-0.0307581	0.856591	-0.499774	0.00163572	-0.170023	0.314387	0.215368	0.200491	-0.451397	0.00504304	0.296561	0.0746954	0.360377	0.0284471	0.0816108	0.631097	-0.221183	0.188313	0.138136	0.414885
blue	ENSMUSG00000086136	622167	Gm12718	predicted gene 12718	0.210006	0.212199	-0.127526	0.451952	0.190992	0.257488	0.354341	0.0314167	0.174925	0.300426	0.186974	0.267823	0.300055	0.0711762	-0.538739	0.000581684	-0.346736	0.035515	-0.0387911	0.81969	-0.134867	0.426118	0.304847	0.0665636	-0.22214	0.186358	-0.197318	0.241762	0.0954823	0.574014	-0.147797	0.382681	0.162194	0.337511
blue	ENSMUSG00000026188	271711	Tmem169	transmembrane protein 169	-0.342505	0.0379774	-0.294948	0.0763645	0.129337	0.445502	-0.336804	0.0415133	0.371722	0.0234915	-0.0286504	0.866327	-0.169624	0.31554	0.094802	0.576759	0.472421	0.00315345	0.441202	0.00626792	-0.138763	0.412747	0.04168	0.806508	-0.349085	0.0342048	-0.189149	0.262196	0.208597	0.215352	0.0751399	0.658492	-0.216961	0.1971
blue	ENSMUSG00000067656	171405	Slc22a27	solute carrier family 22, member 27	0.668257	6.19e-06	0.547953	0.000447095	0.48858	0.00215376	0.755484	6.49e-08	-0.634076	2.51e-05	0.276877	0.0971187	0.257685	0.123615	-0.327307	0.0479916	-0.462185	0.00397781	-0.239397	0.153562	0.0753697	0.657511	0.110031	0.516796	-0.0294563	0.862601	0.234869	0.161728	0.271832	0.10362	-0.0961037	0.571513	-0.119364	0.481643
blue	ENSMUSG00000050447	320343	Lypd6	LY6/PLAUR domain containing 6	0.0883503	0.603072	-0.0702674	0.679415	0.0562015	0.741107	0.390456	0.0168834	-0.138504	0.41363	-0.057448	0.735568	0.0102243	0.952109	-0.0444788	0.793786	-0.269595	0.106606	0.0582524	0.732001	0.0901177	0.595813	-0.0686243	0.686526	0.0880596	0.60427	0.385085	0.0185947	0.257621	0.123713	-0.0523741	0.758192	-0.0230606	0.892236
blue	ENSMUSG00000057722	16847	Lepr	leptin receptor	0.245434	0.143145	0.334918	0.0427401	0.203908	0.226079	0.55784	0.000334221	-0.597962	9.29e-05	-0.242092	0.148845	0.0459197	0.787257	-0.137404	0.417385	-0.685038	2.91e-06	-0.377171	0.0213791	0.399263	0.0143636	-0.170599	0.312725	0.299244	0.071981	0.401736	0.013716	0.0966664	0.569252	-0.325093	0.049613	0.205337	0.222772
blue	ENSMUSG00000074254	13086	Cyp2a4	cytochrome P450, family 2, subfamily a, polypeptide 4	0.55582	0.000354956	0.463105	0.00389673	0.372268	0.0232721	0.752061	8.04e-08	-0.621405	4.05e-05	0.193086	0.252209	0.378338	0.0209477	-0.405225	0.0128444	-0.629196	3.03e-05	-0.22372	0.183165	0.00785252	0.96321	0.0174111	0.918534	0.0156756	0.926631	0.276652	0.0974026	0.23302	0.165152	-0.125909	0.457754	0.0982657	0.562849
blue	ENSMUSG00000041073	192950	Nacad	NAC alpha domain containing	-0.246511	0.141342	-0.23399	0.163349	-0.219918	0.190916	-0.3029	0.0684087	0.284902	0.0874255	-0.128564	0.448248	-0.316431	0.0563826	0.419122	0.00982239	0.285879	0.086299	0.138945	0.41213	0.232469	0.166184	0.12772	0.451257	-0.0632394	0.710012	0.043439	0.798506	0.0638943	0.707141	0.184333	0.274763	-0.0448552	0.792079
blue	ENSMUSG00000002831	57435	Plin4	perilipin 4	0.316116	0.0566419	0.356667	0.0302436	0.0132754	0.937841	0.194169	0.249508	-0.173701	0.303876	0.32259	0.0514982	-0.184296	0.27486	0.35362	0.0317876	0.106384	0.530868	-0.325736	0.0491377	0.24852	0.138025	0.0695086	0.682696	0.241569	0.149753	0.460546	0.00412577	-0.172813	0.306393	0.233444	0.164364	-0.051678	0.761311
blue	ENSMUSG00000037924	18313	Olfr16	olfactory receptor 16	-0.387423	0.0178326	-0.384809	0.0186863	-0.283796	0.0887159	-0.619492	4.35e-05	0.261854	0.117445	-0.0943957	0.578401	-0.150768	0.373082	0.232146	0.16679	0.340513	0.0391835	0.352226	0.0325153	-0.00742254	0.965223	-0.0293151	0.863254	-0.00597264	0.972013	-0.0883738	0.602976	0.0312373	0.854381	-0.0319873	0.850923	0.0169198	0.920826
blue	ENSMUSG00000085211	NA	NA	NA	-0.343321	0.0374917	-0.247591	0.139552	0.0262544	0.877417	-0.393527	0.0159656	0.367438	0.025271	-0.245253	0.14345	-0.232794	0.165575	0.392579	0.0162443	0.0967162	0.569053	0.125449	0.459411	0.0501993	0.767951	-0.396334	0.0151639	0.107138	0.527944	-0.126318	0.456284	-0.109687	0.518115	0.181197	0.283154	0.134134	0.428661
blue	ENSMUSG00000090021	NA	NA	NA	-0.141867	0.40227	-0.146071	0.388324	-0.00611	0.97137	-0.334346	0.0431179	0.176868	0.295005	-0.191977	0.254996	-0.195399	0.246463	0.0198484	0.907176	0.367445	0.0252682	0.208154	0.21635	0.0878879	0.604978	0.498154	0.00170312	-0.162509	0.336561	0.0391634	0.817988	0.0641293	0.706112	-0.0402989	0.812803	-0.125272	0.46005
blue	ENSMUSG00000052565	14957	Hist1h1d	histone cluster 1, H1d	-0.381016	0.0199857	-0.28772	0.0842054	-0.250703	0.134485	-0.649561	1.36e-05	0.552557	0.000390885	0.0129419	0.9394	-0.332647	0.0442558	0.423704	0.00896927	0.534443	0.000655944	0.360103	0.0285769	0.0223338	0.895613	0.00713397	0.966574	-0.0795968	0.639574	-0.095835	0.572594	-0.030581	0.857408	0.131195	0.438935	0.086716	0.609819
blue	ENSMUSG00000112937	NA	NA	NA	-0.32848	0.0471501	-0.0298435	0.860813	-0.312879	0.0593629	-0.546097	0.000471726	0.199454	0.236599	-0.20067	0.233696	-0.278229	0.0954314	0.30859	0.0631268	0.320567	0.0530636	0.0811856	0.632883	0.0558479	0.74268	-0.188033	0.265073	0.0435592	0.797961	-0.0386173	0.820484	-0.144057	0.39497	-0.116096	0.493807	-0.153055	0.365791
blue	ENSMUSG00000040420	320865	Cdh18	cadherin 18	0.611509	5.8e-05	0.392254	0.0163407	0.470231	0.003316	0.719233	5.3e-07	-0.537054	0.00060987	0.358908	0.0291476	0.515078	0.00110581	-0.703822	1.18e-06	-0.60207	8.07e-05	-0.22093	0.188832	-0.123262	0.467338	0.167473	0.321807	-0.12949	0.44496	0.00672311	0.968498	0.164256	0.33132	-0.306741	0.0648062	-0.0867125	0.609834
blue	ENSMUSG00000082039	NA	NA	NA	0.543756	0.0005045	0.326012	0.0489348	0.24715	0.140281	0.702528	1.25e-06	-0.451809	0.00499821	0.652648	1.2e-05	0.686949	2.66e-06	-0.549163	0.000431663	-0.414273	0.0107994	-0.140288	0.407582	-0.412778	0.0111169	0.118705	0.484082	-0.175511	0.298785	-0.0718592	0.672553	0.239068	0.154145	0.116587	0.49197	-0.089775	0.597217
blue	ENSMUSG00000052392	171282	Acot4	acyl-CoA thioesterase 4	0.684502	2.98e-06	0.505398	0.00141951	0.423307	0.00904067	0.870029	2.71e-12	-0.767794	2.93e-08	0.48223	0.00250737	0.582106	0.000157223	-0.523893	0.000875192	-0.70074	1.37e-06	-0.384724	0.0187146	-0.113472	0.503687	-0.0371714	0.827102	0.0930402	0.583893	0.210937	0.210134	0.119749	0.480219	-0.132353	0.43487	0.0506773	0.765803
blue	ENSMUSG00000049685	13108	Cyp2g1	cytochrome P450, family 2, subfamily g, polypeptide 1	0.553884	0.000375895	0.309718	0.0621197	0.425695	0.00861884	0.704788	1.12e-06	-0.600755	8.45e-05	0.248697	0.137736	0.606271	6.98e-05	-0.658702	9.33e-06	-0.793891	4.56e-09	-0.280687	0.0924197	-0.120853	0.47615	0.0427978	0.801421	-0.0181804	0.914947	-0.0358636	0.833098	0.20185	0.2309	-0.227642	0.175407	0.148025	0.38194
blue	ENSMUSG00000104785	102633249	Gm31121	predicted gene, 31121	0.748335	1.01e-07	0.364635	0.0264947	0.498383	0.00169345	0.644866	1.65e-05	-0.38846	0.0175033	0.585609	0.000140306	0.641504	1.88e-05	-0.697215	1.63e-06	-0.398202	0.0146492	-0.242089	0.148851	-0.369255	0.0245029	0.210776	0.210489	-0.169042	0.317226	-0.137359	0.41754	0.0798854	0.638356	-0.0403222	0.812697	0.118695	0.484119
blue	ENSMUSG00000057425	112417	Ugt2b37	UDP glucuronosyltransferase 2 family, polypeptide B37	-0.447586	0.00547419	-0.308523	0.063187	-0.370372	0.0240404	-0.692143	2.08e-06	0.661232	8.38e-06	-0.0747015	0.660364	-0.318354	0.0548194	0.402034	0.0136398	0.613392	5.42e-05	0.0768281	0.651301	0.0161055	0.924625	0.142564	0.399937	0.176502	0.296021	0.03876	0.819832	-0.313383	0.0589331	0.192471	0.253753	0.150869	0.372757
blue	ENSMUSG00000115979	NA	NA	NA	0.417487	0.010143	0.272792	0.102358	0.261162	0.118454	0.678311	3.96e-06	-0.538683	0.000582606	0.199226	0.237148	0.62994	2.94e-05	-0.591204	0.000116661	-0.674009	4.81e-06	-0.269337	0.106955	-0.335397	0.0424259	-0.307152	0.0644303	0.135771	0.422995	-0.0569248	0.737891	0.0619701	0.715588	-0.120654	0.476883	0.157529	0.351774
blue	ENSMUSG00000099413	NA	NA	NA	-0.627855	3.19e-05	-0.467832	0.0035025	-0.440552	0.006354	-0.762231	4.22e-08	0.633717	2.55e-05	-0.206546	0.22	-0.499932	0.00162927	0.468369	0.00345996	0.698021	1.57e-06	0.417935	0.0100543	0.0797247	0.639034	0.127556	0.451845	-0.203368	0.227338	-0.198657	0.238518	-0.0384595	0.821206	0.0072477	0.966042	-0.124491	0.462874
blue	ENSMUSG00000106680	NA	NA	NA	0.198028	0.240037	0.184413	0.27455	0.113896	0.502084	0.180382	0.285359	-0.213286	0.204983	0.00556927	0.973903	-0.06225	0.714357	0.184988	0.273029	-0.285878	0.0863005	-0.135838	0.422765	0.295181	0.076121	-0.127456	0.452202	0.184737	0.273694	0.143885	0.395542	0.0996974	0.557145	0.0358998	0.832932	0.152967	0.36607
blue	ENSMUSG00000047528	108812	Flacc1	flagellum associated containing coiled-coil domains 1	0.540262	0.000557217	0.408008	0.0121831	0.214771	0.201771	0.545768	0.000476213	-0.391101	0.0166868	0.70535	1.09e-06	0.546469	0.000466689	-0.450616	0.00512888	-0.300807	0.0704363	-0.147404	0.383964	-0.265218	0.112639	0.149448	0.37733	-0.032232	0.849795	-0.0466477	0.783964	0.181174	0.283215	-0.0258051	0.879499	0.075871	0.655374
blue	ENSMUSG00000027870	56185	Hao2	hydroxyacid oxidase 2	0.706887	1.01e-06	0.514719	0.00111626	0.373589	0.022749	0.638574	2.11e-05	-0.60193	8.11e-05	0.3065	0.0650285	0.263699	0.11479	-0.280422	0.0927407	-0.393341	0.0160199	-0.154883	0.360024	0.0151453	0.929107	0.0160315	0.924971	0.00928998	0.956481	0.320639	0.0530079	0.165322	0.328149	-0.119202	0.482241	-0.0493137	0.771935
blue	ENSMUSG00000022340	319613	Sybu	syntabulin (syntaxin-interacting)	-0.0789042	0.642499	0.14893	0.379003	-0.076736	0.651692	-0.366587	0.0256377	-0.129847	0.443694	-0.0467276	0.783603	-0.135417	0.424216	0.266738	0.110515	0.23124	0.168498	0.160714	0.341995	0.137113	0.418383	-0.0819723	0.62958	0.162913	0.335343	0.0797683	0.63885	0.01379	0.935437	-0.0235442	0.88999	0.162913	0.335345
blue	ENSMUSG00000078588	381546	Ccdc24	coiled-coil domain containing 24	0.516876	0.00105484	0.343109	0.0376178	0.414425	0.0107677	0.523035	0.000895602	-0.250398	0.134976	0.344707	0.0366787	0.413165	0.0110341	-0.381615	0.0197758	-0.10548	0.534387	-0.133561	0.430651	-0.340895	0.0389501	0.0924808	0.586166	0.128859	0.447198	0.170602	0.312715	0.0714269	0.674414	0.242448	0.14823	0.0295571	0.862136
blue	ENSMUSG00000057465	20209	Saa2	serum amyloid A 2	-0.489923	0.00208485	-0.297425	0.0738124	-0.209713	0.212853	-0.850051	2.8e-11	0.416839	0.0102726	-0.300872	0.0703731	-0.288864	0.0829247	0.323589	0.0507394	0.520475	0.000958993	0.358248	0.0294669	-0.0973304	0.56659	-0.228442	0.173853	-0.112413	0.507703	-0.332209	0.044553	-0.15008	0.375293	-0.03728	0.826605	-0.0115459	0.945927
blue	ENSMUSG00000065219	27209	Snord32a	small nucleolar RNA, C/D box 32A	-0.37598	0.0218267	-0.318515	0.0546907	-0.399701	0.0142471	-0.50583	0.001404	0.445708	0.0056982	-0.330314	0.0458576	-0.473972	0.00304252	0.534023	0.000663633	0.329355	0.0465302	0.232678	0.165792	0.275421	0.0989619	-0.0770866	0.650202	0.12502	0.46096	0.0631709	0.710313	-0.0277432	0.870523	0.0517092	0.761172	0.230915	0.169114
blue	ENSMUSG00000039109	74145	F13a1	coagulation factor XIII, A1 subunit	-0.331684	0.0449113	-0.170036	0.314348	-0.183142	0.277929	-0.384413	0.0188188	0.365197	0.0262458	-0.126527	0.45553	-0.387245	0.0178896	0.363374	0.0270611	0.487917	0.00218852	0.477454	0.00280583	0.14831	0.381014	0.116874	0.490898	-0.1384	0.413986	0.183367	0.277328	0.195344	0.246598	-0.0431262	0.799928	-0.0550104	0.746411
blue	ENSMUSG00000078787	384724	Cyp2t4	cytochrome P450, family 2, subfamily t, polypeptide 4	0.138702	0.412956	0.0710789	0.675913	0.0260218	0.878495	0.30069	0.0705506	-0.0314856	0.853236	-0.0460579	0.786632	0.132648	0.433837	-0.101169	0.551312	-0.152919	0.366221	-0.244334	0.145003	0.0234466	0.890443	0.186155	0.269962	0.13624	0.42138	0.196309	0.244225	0.000327393	0.998466	0.221418	0.187832	0.197586	0.241109
blue	ENSMUSG00000035686	21835	Thrsp	thyroid hormone responsive	0.46789	0.00349787	0.288462	0.0833731	0.34437	0.036875	0.727424	3.39e-07	-0.559418	0.000318783	-0.0797909	0.638755	0.109984	0.516975	-0.274196	0.100534	-0.778085	1.45e-08	-0.429662	0.00795527	0.353568	0.0318147	-0.0313866	0.853692	0.12078	0.47642	0.207793	0.217167	0.016804	0.921366	-0.277969	0.0957535	0.019225	0.91008
blue	ENSMUSG00000086389	NA	NA	NA	-0.562589	0.000289682	-0.525781	0.000831741	-0.325914	0.0490064	-0.662265	8.02e-06	0.653176	1.17e-05	-0.406702	0.0124899	-0.330963	0.0454074	0.233872	0.163569	0.515636	0.00108978	0.183949	0.275781	-0.032244	0.84974	0.0292303	0.863646	-0.066078	0.697597	-0.246012	0.142176	-0.259327	0.121157	0.113207	0.504691	-0.0102438	0.952018
blue	ENSMUSG00000107216	NA	NA	NA	-0.445681	0.00570141	-0.464289	0.00379458	-0.393581	0.0159499	-0.289826	0.0818592	0.234544	0.162326	-0.315629	0.0570453	-0.192017	0.254897	0.174358	0.302022	-0.0721626	0.671248	-0.0859781	0.612876	0.213434	0.204661	-0.221224	0.188227	0.14664	0.38646	-0.115383	0.496484	-0.219691	0.191385	-0.267928	0.108874	0.33641	0.0417669
blue	ENSMUSG00000048922	108912	Cdca2	cell division cycle associated 2	-0.508111	0.00132452	-0.23783	0.156354	-0.372493	0.0231825	-0.423698	0.00897036	0.45299	0.00487169	-0.203883	0.226137	-0.46744	0.00353385	0.536931	0.000611978	0.46158	0.00403189	0.236599	0.158572	0.0684925	0.687097	-0.388919	0.0173589	-0.0436746	0.797436	-0.0179601	0.915975	-0.0254704	0.881051	0.151767	0.369885	-0.145055	0.391668
blue	ENSMUSG00000106560	NA	NA	NA	-0.463069	0.00389991	-0.370441	0.0240121	-0.317777	0.0552852	-0.641563	1.88e-05	0.583776	0.00014894	-0.441506	0.00622795	-0.70963	8.76e-07	0.594085	0.000105946	0.459216	0.00424945	0.506045	0.00139632	0.406191	0.0126116	-0.0717545	0.673003	-0.120733	0.476592	0.0453539	0.789819	0.0618021	0.716327	-0.148282	0.381105	-0.039477	0.816555
blue	ENSMUSG00000094145	667180	Vmn2r20	vomeronasal 2, receptor 20	0.575761	0.000192592	0.264703	0.113365	0.52372	0.000879269	0.448593	0.00535726	-0.185344	0.272091	0.427009	0.00839402	0.478538	0.00273549	-0.592693	0.000111007	-0.399876	0.0142008	-0.213102	0.205382	-0.246553	0.141274	0.0847731	0.617881	-0.175505	0.298802	-0.106446	0.530629	-0.0252841	0.881915	-0.112944	0.50569	0.11702	0.490352
blue	ENSMUSG00000089942	18725	Pira2	paired-Ig-like receptor A2	-0.305842	0.0656356	-0.094722	0.577082	-0.36795	0.0250527	-0.451239	0.00506029	0.33492	0.0427388	-0.040728	0.810846	-0.249998	0.135622	0.249616	0.13624	0.536716	0.00061567	0.506154	0.00139245	-0.0914106	0.590526	-0.0125842	0.941072	-0.288122	0.0837534	-0.232886	0.165403	0.191749	0.255572	-0.0595723	0.72616	-0.0833081	0.623989
blue	ENSMUSG00000106930	NA	NA	NA	-0.448175	0.00540554	-0.21716	0.196681	-0.183954	0.275767	-0.70774	9.64e-07	0.53447	0.000655448	-0.305193	0.0662398	-0.33195	0.0447299	0.322671	0.0514366	0.430891	0.00775875	0.321331	0.0524683	0.0251382	0.882592	-0.185103	0.272727	0.109526	0.518732	-0.0538766	0.751471	-0.10986	0.517452	-0.0454502	0.789383	0.107104	0.528075
blue	ENSMUSG00000091405	97122	Hist2h4	histone cluster 2, H4	-0.310294	0.0616095	-0.24683	0.140811	-0.297236	0.0740043	-0.37965	0.0204718	0.331683	0.0449119	-0.0248307	0.884018	-0.0880683	0.604234	0.163102	0.334777	0.227236	0.176198	0.226907	0.176842	0.0504168	0.766974	0.223151	0.18431	0.0140953	0.934011	-0.0508693	0.764941	-0.0167705	0.921522	0.103332	0.542787	0.198104	0.239853
blue	ENSMUSG00000055865	329731	Tafa3	TAFA chemokine like family member 3	0.301434	0.0698235	0.491899	0.00198693	0.291704	0.0798103	0.45856	0.00431156	-0.50906	0.00129266	0.06778	0.69019	0.103631	0.541613	-0.15706	0.353227	-0.41842	0.00995897	-0.327465	0.0478778	0.223954	0.182695	0.0433256	0.799022	0.184563	0.274154	0.264773	0.113265	0.0816647	0.630871	-0.144581	0.393235	-0.240676	0.15131
blue	ENSMUSG00000021226	171210	Acot2	acyl-CoA thioesterase 2	0.740627	1.6e-07	0.615988	4.94e-05	0.404014	0.0131415	0.801659	2.49e-09	-0.750349	8.93e-08	0.631807	2.74e-05	0.537906	0.000595465	-0.351926	0.0326735	-0.460738	0.00410823	-0.315097	0.0574875	-0.163824	0.332611	-0.0512233	0.763352	0.0741022	0.662927	0.248892	0.137418	0.177593	0.292999	0.115495	0.496063	-0.121377	0.474228
blue	ENSMUSG00000029482	78894	Aacs	acetoacetyl-CoA synthetase	0.33888	0.040196	0.255	0.127715	0.202508	0.229352	0.466609	0.00360103	-0.448514	0.00536638	-0.0480941	0.777432	-0.0775963	0.648038	0.0101705	0.95236	-0.431955	0.00759215	-0.152391	0.367899	0.440043	0.00642215	0.208584	0.215382	-0.0581601	0.73241	0.17606	0.297252	0.248449	0.138141	-0.0195545	0.908545	-0.130233	0.44233
blue	ENSMUSG00000044734	66222	Serpinb1a	serine (or cysteine) peptidase inhibitor, clade B, member 1a	0.340793	0.0390124	0.19846	0.238992	0.239003	0.154261	0.65176	1.24e-05	-0.288668	0.0831424	0.113036	0.505338	0.00355701	0.98333	-0.0880669	0.60424	-0.388542	0.0174774	-0.0811014	0.633237	0.23092	0.169105	0.0194925	0.908834	0.0467249	0.783615	0.470115	0.00332482	0.252961	0.130896	-0.137132	0.418315	0.0699131	0.680946
blue	ENSMUSG00000047730	215384	Fcgbp	Fc fragment of IgG binding protein	0.149616	0.376786	0.183355	0.277362	0.190038	0.259919	0.262182	0.11697	-0.189833	0.260442	-0.0785306	0.64408	0.0237383	0.889088	0.00909089	0.957413	-0.140381	0.407267	0.0545714	0.748369	0.0512737	0.763125	-0.0946263	0.577469	0.20504	0.223458	0.502405	0.00153122	0.360133	0.0285626	0.0682294	0.688239	0.0777947	0.647197
blue	ENSMUSG00000085006	NA	NA	NA	-0.676914	4.22e-06	-0.629203	3.03e-05	-0.482711	0.00247892	-0.783754	9.67e-09	0.808077	1.48e-09	-0.425404	0.00866924	-0.614586	5.19e-05	0.589503	0.000123437	0.478948	0.00270926	0.245865	0.142423	0.308897	0.0628516	0.0427566	0.801608	0.0824741	0.627478	-0.114106	0.50129	-0.210089	0.212014	0.0847525	0.617967	0.107869	0.525115
blue	ENSMUSG00000027656	22403	Ccn5	cellular communication network factor 5	-0.101313	0.550742	-0.179197	0.288589	0.0203395	0.90489	-0.252988	0.130854	0.254722	0.128146	0.0639536	0.706881	0.0370528	0.827645	-0.0245778	0.885191	0.268899	0.107549	0.261618	0.117789	-0.295806	0.0754726	-0.00456429	0.978611	-0.452497	0.00492416	-0.359032	0.0290878	0.0402446	0.813051	0.197041	0.242437	-0.42283	0.009127
blue	ENSMUSG00000116723	NA	NA	NA	-0.226155	0.17832	-0.224976	0.180654	-0.0208877	0.902339	-0.206139	0.220932	0.0208347	0.902585	-0.390735	0.0167983	-0.0706419	0.677798	0.0702932	0.679304	0.0368044	0.828784	0.129762	0.443995	-0.0490763	0.773004	-0.226825	0.177003	0.0781783	0.645571	-0.0553032	0.745106	-0.0266539	0.875566	-0.0247413	0.884433	0.153011	0.365928
blue	ENSMUSG00000087254	100504268	2310005A03Rik	RIKEN cDNA 2310005A03 gene	0.424967	0.00874556	0.206045	0.221146	0.221065	0.188553	0.555235	0.000361166	-0.489174	0.00212301	0.491107	0.00202566	0.659895	8.87e-06	-0.620434	4.2e-05	-0.565155	0.000267896	-0.158968	0.347336	-0.168964	0.317455	0.26552	0.112214	-0.0864285	0.611009	-0.0787745	0.643048	0.138697	0.412973	-0.102956	0.544265	0.100301	0.554748
blue	ENSMUSG00000072949	26897	Acot1	acyl-CoA thioesterase 1	0.526988	0.00080498	0.37394	0.0226114	0.26227	0.116844	0.783035	1.02e-08	-0.4845	0.00237552	0.519482	0.000984633	0.303543	0.0677947	-0.204231	0.225329	-0.446513	0.00560121	-0.24361	0.146235	0.0575707	0.735024	0.0876073	0.606136	0.041455	0.807532	0.35155	0.0328732	0.236023	0.159619	0.0594223	0.726823	-0.00581945	0.972731
blue	ENSMUSG00000083820	NA	NA	NA	0.510284	0.00125256	0.284927	0.0873966	0.098823	0.560626	0.643732	1.72e-05	-0.371614	0.0235349	0.408605	0.0120452	0.361071	0.028121	-0.413104	0.011047	-0.450134	0.0051826	-0.289619	0.0820877	0.0475504	0.779886	0.324575	0.0499982	-0.0945955	0.577593	0.0446745	0.792899	0.0485096	0.775558	0.00482829	0.977374	0.060299	0.72295
blue	ENSMUSG00000103592	NA	NA	NA	0.375688	0.0219377	0.0663617	0.69636	0.228208	0.174306	0.44476	0.00581415	-0.430592	0.00780615	0.122646	0.469584	0.486549	0.00226179	-0.563611	0.00028082	-0.463175	0.00389061	-0.278919	0.0945777	-0.185454	0.271801	0.134522	0.427312	-0.110753	0.514029	-0.317645	0.0553919	0.00731188	0.965741	-0.121184	0.474935	-0.00836293	0.96082
blue	ENSMUSG00000052316	74488	Lrrc15	leucine rich repeat containing 15	0.457775	0.00438699	0.292008	0.0794824	0.174904	0.300486	0.704238	1.15e-06	-0.269558	0.106657	0.430364	0.00784252	0.3051	0.0663265	-0.315837	0.0568727	-0.302816	0.0684889	-0.24764	0.139471	-0.0767316	0.651711	0.13092	0.439902	0.0558173	0.742816	0.154082	0.362544	0.105661	0.533679	0.0951686	0.575279	0.0556528	0.743549
blue	ENSMUSG00000092499	73554	1700092C10Rik	RIKEN cDNA 1700092C10 gene	0.530071	0.000740046	0.371179	0.023711	0.270609	0.105245	0.733246	2.45e-07	-0.649731	1.35e-05	0.192643	0.253321	0.569889	0.000231522	-0.62802	3.17e-05	-0.642368	1.82e-05	-0.357738	0.0297158	-0.231375	0.168241	-0.03622	0.831463	0.0796157	0.639494	-0.0502938	0.767526	0.00716252	0.96644	-0.210253	0.211649	0.0395427	0.816255
blue	ENSMUSG00000024313	17288	Mep1b	meprin 1 beta	-0.319714	0.0537353	-0.284552	0.0878324	-0.0433613	0.798859	-0.412012	0.0112826	0.389047	0.0173188	-0.0818207	0.630216	-0.114609	0.499394	-0.107513	0.526492	0.377467	0.021269	0.301294	0.0699599	-0.164217	0.331436	0.181303	0.282866	-0.303333	0.0679945	-0.213075	0.205442	0.0623307	0.714002	-0.253672	0.129781	-0.13918	0.411332
blue	ENSMUSG00000031906	58994	Smpd3	sphingomyelin phosphodiesterase 3, neutral	-0.0206453	0.903467	0.0129744	0.939248	-0.0136247	0.936209	-0.382043	0.0196267	0.146249	0.38774	0.219508	0.191766	0.128166	0.449667	0.0583663	0.731497	0.409836	0.0117648	-0.0416032	0.806857	-0.29364	0.077739	-0.00380724	0.982158	0.281662	0.091245	0.203152	0.227842	-0.276793	0.0972243	0.289537	0.0821785	-0.0657244	0.699139
blue	ENSMUSG00000097762	NA	NA	NA	0.411824	0.0113236	0.272317	0.102982	0.201019	0.232866	0.638144	2.15e-05	-0.569418	0.000234932	0.165138	0.328694	0.401567	0.0137595	-0.344212	0.0369674	-0.750664	8.76e-08	-0.356614	0.03027	0.0491451	0.772694	-0.25039	0.13499	0.259369	0.121095	0.169766	0.315128	-0.0400488	0.813945	-0.190123	0.259702	0.40632	0.0125807
blue	ENSMUSG00000027654	71878	Fam83d	family with sequence similarity 83, member D	-0.399472	0.014308	-0.112488	0.507419	-0.111813	0.509986	-0.30232	0.0689654	0.372922	0.0230118	-0.043612	0.797721	-0.29642	0.07484	0.30075	0.0704924	0.436598	0.00689994	0.385268	0.0185341	0.0289884	0.864764	-0.0356341	0.834151	-0.245794	0.142541	0.0244469	0.885799	0.165977	0.326208	0.0787239	0.643262	-0.349819	0.0338036
blue	ENSMUSG00000034634	17068	Ly6d	lymphocyte antigen 6 complex, locus D	-0.22964	0.171545	-0.0350008	0.837059	-0.155443	0.358269	-0.25804	0.123081	0.18906	0.262424	-0.239788	0.152872	-0.296457	0.0748021	0.34211	0.038214	0.192187	0.254466	0.154594	0.360933	0.197697	0.24084	-0.0147832	0.930798	0.281133	0.0918805	0.536414	0.000620892	0.0310275	0.855348	0.0569136	0.737941	0.149805	0.376176
blue	ENSMUSG00000104793	NA	NA	NA	0.496265	0.00178484	0.173237	0.305187	0.161697	0.339013	0.526017	0.000826449	-0.355274	0.0309415	0.300326	0.0709086	0.374349	0.0224523	-0.546129	0.000471288	-0.427449	0.00831976	-0.404507	0.0130198	0.0832704	0.624147	0.567085	0.000252488	0.139244	0.411114	0.164858	0.329528	-0.11459	0.499464	-0.20452	0.224659	0.280382	0.0927888
blue	ENSMUSG00000001095	20500	Slc13a2	solute carrier family 13 (sodium-dependent dicarboxylate transporter), member 2	-0.0520399	0.759689	-0.236759	0.158282	-0.161483	0.339662	0.266263	0.111176	0.156769	0.35413	0.0673955	0.691861	0.212837	0.205961	-0.260385	0.119593	-0.133969	0.429234	-0.0138633	0.935095	-0.226681	0.177285	0.120082	0.478988	-0.159546	0.345562	-0.3055	0.0659535	-0.0386029	0.82055	0.132007	0.436082	0.0575841	0.734964
blue	ENSMUSG00000027533	16592	Fabp5	fatty acid binding protein 5, epidermal	-0.542594	0.000521526	-0.161615	0.339261	-0.458432	0.00432379	-0.664208	7.38e-06	0.244531	0.14467	-0.299451	0.071775	-0.35407	0.0315553	0.482989	0.00246259	0.591558	0.000115292	0.155987	0.356566	0.00254395	0.988078	-0.217573	0.195809	0.185064	0.272831	-0.0533599	0.75378	-0.158851	0.347694	0.121307	0.474483	-0.156938	0.353606
blue	ENSMUSG00000086638	74846	4930405A21Rik	RIKEN cDNA 4930405A21 gene	0.0274224	0.872007	-0.0253256	0.881723	-0.00413729	0.980611	-0.229025	0.172727	0.0297404	0.861289	0.0294382	0.862685	-0.0294644	0.862564	0.127764	0.451102	0.187907	0.2654	0.133546	0.430704	0.0124471	0.941713	0.189905	0.260258	0.0880919	0.604137	0.182226	0.280381	-0.0365467	0.829965	0.125269	0.460062	0.22209	0.18646
blue	ENSMUSG00000038963	108115	Slco4a1	solute carrier organic anion transporter family, member 4a1	0.0516039	0.761644	-0.102791	0.544915	0.0465411	0.784446	0.26881	0.10767	0.0396434	0.815796	0.00126829	0.994056	0.0694329	0.683023	-0.0403895	0.81239	-0.0559572	0.742194	-0.0190739	0.910784	-0.100202	0.555143	-0.0485352	0.775442	0.00827737	0.961221	0.0372525	0.826731	0.159026	0.347156	0.152955	0.366106	0.0370962	0.827447
blue	ENSMUSG00000110659	NA	NA	NA	0.517582	0.00103539	0.311977	0.0601392	0.182925	0.27851	0.687232	2.63e-06	-0.450866	0.0051013	0.557997	0.000332658	0.706133	1.05e-06	-0.526004	0.000826734	-0.396158	0.0152131	-0.401028	0.013899	-0.51932	0.000988888	-0.238075	0.155915	0.157317	0.35243	0.0225584	0.89457	-0.0933881	0.582481	0.155854	0.356984	0.0155356	0.927285
blue	ENSMUSG00000113637	NA	NA	NA	0.274354	0.10033	0.356734	0.0302105	0.403083	0.0133737	0.410851	0.0115377	-0.283487	0.0890787	0.0740694	0.663067	-0.0425145	0.802709	-0.0783748	0.644739	-0.14865	0.379912	-0.0887805	0.601302	0.0420324	0.804903	-0.155856	0.356975	-0.0306262	0.8572	0.252152	0.132174	0.1655	0.327621	-0.156982	0.353469	-0.356221	0.0304656
blue	ENSMUSG00000034227	15223	Foxj1	forkhead box J1	0.341605	0.0385186	0.477644	0.0027934	0.262247	0.116876	0.382018	0.0196354	-0.363126	0.0271736	0.28303	0.0896175	0.106327	0.531089	0.0628151	0.711874	-0.21676	0.197526	-0.161759	0.338825	0.215421	0.200378	0.0377055	0.824656	0.211732	0.20838	0.471205	0.00324283	0.0996926	0.557164	0.168199	0.319682	0.0707092	0.677508
blue	ENSMUSG00000112532	102640148	Gm36283	predicted gene, 36283	-0.131284	0.438621	0.12281	0.468986	-0.0453886	0.789662	-0.397537	0.0148308	0.0240051	0.887849	0.164387	0.330929	-0.107391	0.526966	0.217852	0.195223	0.384859	0.0186698	0.345174	0.0364085	-0.00209292	0.990191	-0.073332	0.666227	0.136778	0.41953	0.176117	0.297095	0.135674	0.423327	-0.0642961	0.705381	0.0434255	0.798568
blue	ENSMUSG00000029380	14825	Cxcl1	chemokine (C-X-C motif) ligand 1	-0.290924	0.0806563	-0.207932	0.216852	-0.0114221	0.946506	-0.551098	0.000407967	0.391293	0.0166288	-0.168406	0.319078	-0.313686	0.058675	0.262468	0.116558	0.487563	0.00220725	0.0663948	0.696216	0.0552882	0.745173	0.0468909	0.782865	-0.00733427	0.965636	0.165228	0.328428	-0.268998	0.107414	0.0334129	0.844358	-0.179345	0.288185
blue	ENSMUSG00000038917	665306	3930402G23Rik	RIKEN cDNA 3930402G23 gene	-0.443735	0.0059418	-0.29415	0.0772011	-0.287063	0.0849477	-0.716256	6.2e-07	0.41202	0.0112808	-0.125069	0.460783	-0.250293	0.135145	0.316873	0.0560202	0.691375	2.16e-06	0.352468	0.0323878	-0.0978071	0.564682	0.150995	0.372354	-0.058892	0.729169	-0.058817	0.7295	-0.07135	0.674745	0.119459	0.481291	-0.0870803	0.608312
blue	ENSMUSG00000040985	194974	Sun3	Sad1 and UNC84 domain containing 3	0.665457	6.99e-06	0.412117	0.0112598	0.261492	0.117972	0.799328	2.99e-09	-0.616718	4.81e-05	0.415638	0.0105164	0.547358	0.000454866	-0.466126	0.00364058	-0.602428	7.97e-05	-0.347365	0.0351598	-0.0690043	0.684879	0.233343	0.164551	0.137933	0.415577	0.298806	0.0724186	0.0762387	0.653808	0.0746314	0.660664	0.105543	0.534138
blue	ENSMUSG00000032808	13097	Cyp2c38	cytochrome P450, family 2, subfamily c, polypeptide 38	0.631051	2.82e-05	0.493083	0.00193022	0.520489	0.000958638	0.809533	1.31e-09	-0.671313	5.42e-06	0.220632	0.189443	0.23773	0.156533	-0.294123	0.077229	-0.553591	0.000379163	-0.255789	0.1265	0.132859	0.4331	0.0658227	0.69871	-0.0493402	0.771816	0.272484	0.102762	0.300814	0.0704294	-0.104468	0.538337	-0.0721449	0.671324
blue	ENSMUSG00000023033	20273	Scn8a	sodium channel, voltage-gated, type VIII, alpha	-0.412158	0.011251	-0.367692	0.0251625	-0.253435	0.130152	-0.561444	0.000299906	0.541278	0.000541404	-0.333248	0.0438502	-0.350086	0.0336585	0.211777	0.208281	0.305449	0.0660015	0.236043	0.159583	0.184958	0.273108	0.108701	0.521908	-0.00388007	0.981817	0.0742886	0.662129	-0.205761	0.221798	-0.15007	0.375324	0.0903215	0.594978
blue	ENSMUSG00000108105	NA	NA	NA	-0.384864	0.018668	-0.092536	0.585942	-0.406445	0.0125509	-0.478472	0.00273969	0.224177	0.182249	-0.00620574	0.970921	-0.202595	0.229147	0.246381	0.141559	0.366712	0.0255833	-0.0326286	0.847969	0.00771718	0.963843	-0.137689	0.41641	0.15227	0.368283	-0.106671	0.529753	-0.238961	0.154335	-0.161936	0.338289	0.0210976	0.901362
blue	ENSMUSG00000071036	NA	NA	NA	-0.377342	0.0213154	-0.0597598	0.725331	-0.166654	0.324212	-0.514983	0.00110857	0.138775	0.412707	-0.48064	0.00260347	-0.403986	0.0131485	0.309584	0.0622384	0.176928	0.29484	0.0915235	0.590066	0.300321	0.0709136	-0.0656827	0.699321	0.269966	0.106107	0.179846	0.286819	-0.0343947	0.839843	-0.2642	0.114077	0.0454446	0.789408
blue	ENSMUSG00000074715	56838	Ccl28	chemokine (C-C motif) ligand 28	-0.380598	0.0201336	-0.379668	0.0204655	-0.460438	0.00413575	-0.260485	0.119446	0.223135	0.184343	-0.202579	0.229183	-0.10959	0.518486	0.118553	0.484646	0.180717	0.284451	-0.0753319	0.657672	-0.0995114	0.557885	-0.206502	0.220101	0.222409	0.185812	0.129853	0.443673	-0.164407	0.330869	-0.125728	0.458407	0.0963308	0.5706
blue	ENSMUSG00000071984	68655	Fndc1	fibronectin type III domain containing 1	-0.0727295	0.668812	-0.0782699	0.645183	0.0572306	0.736533	0.252021	0.132382	-0.0243037	0.886464	0.0218601	0.897816	0.137862	0.415819	-0.195575	0.24603	-0.236863	0.158095	-0.133419	0.431148	-0.0966229	0.569427	-0.0853389	0.615529	-0.0104022	0.951276	-0.0731655	0.66694	0.0308922	0.855972	-0.0747613	0.660109	0.0627911	0.71198
blue	ENSMUSG00000056054	20201	S100a8	S100 calcium binding protein A8 (calgranulin A)	-0.37268	0.0231078	-0.200868	0.233226	-0.161282	0.340271	-0.533535	0.000672675	0.454523	0.00471158	-0.214117	0.203181	-0.505953	0.00139962	0.376616	0.0215869	0.5145	0.00112265	0.430311	0.00785095	0.197727	0.240768	0.0110525	0.948234	-0.273988	0.100803	-0.0607589	0.720921	0.00161874	0.992413	-0.121075	0.475336	-0.258945	0.121726
blue	ENSMUSG00000066000	112422	Zfp979	zinc finger protein 979	0.555889	0.000354224	0.164358	0.331015	0.317527	0.0554878	0.603213	7.76e-05	-0.136982	0.418832	0.449175	0.00529076	0.227919	0.174868	-0.393901	0.0158567	-0.257309	0.124184	-0.204612	0.224446	-0.0778171	0.647102	0.220522	0.18967	-0.174794	0.300796	0.0642356	0.705646	0.0092062	0.956873	-0.128725	0.447675	0.108994	0.520778
blue	ENSMUSG00000040473	207686	Cfap69	cilia and flagella associated protein 69	-0.285296	0.0869699	-0.049472	0.771223	0.047794	0.778786	-0.428613	0.00812637	0.273896	0.100922	-0.39528	0.0154609	-0.471347	0.00323225	0.470736	0.0032779	0.142294	0.40084	0.145167	0.3913	0.389197	0.0172721	-0.211281	0.209373	0.289941	0.081732	0.533134	0.000680185	-0.00470056	0.977972	-0.146553	0.386745	0.0921761	0.587406
blue	ENSMUSG00000113616	NA	NA	NA	0.25817	0.122886	0.240015	0.15247	-0.0152065	0.928822	0.46266	0.00393576	-0.329217	0.0466276	0.19382	0.250377	0.271792	0.103674	-0.260781	0.119012	-0.37396	0.0226036	-0.161582	0.339362	-0.0168996	0.92092	0.0369834	0.827963	0.0840148	0.621039	0.180856	0.284075	-0.020297	0.905088	-0.0760049	0.654803	0.0722749	0.670765
blue	ENSMUSG00000032184	70082	Lysmd2	LysM, putative peptidoglycan-binding, domain containing 2	-0.416787	0.0102831	-0.179523	0.287698	-0.315285	0.0573313	-0.565856	0.000262205	0.233457	0.164338	-0.0113108	0.947026	-0.304806	0.0666016	0.485862	0.00229937	0.598588	9.1e-05	0.536003	0.000628052	-0.00490572	0.977011	-0.184636	0.273961	-0.147002	0.385275	-0.0141082	0.933951	0.173264	0.305111	0.151273	0.371464	-0.250684	0.134516
blue	ENSMUSG00000021508	57266	Cxcl14	chemokine (C-X-C motif) ligand 14	-0.561444	0.000299901	-0.299439	0.0717868	-0.328914	0.0468413	-0.889191	1.95e-13	0.517408	0.00104016	-0.256944	0.124737	-0.370053	0.0241718	0.505319	0.00142237	0.709232	8.94e-07	0.307873	0.0637745	-0.0745843	0.660865	-0.162295	0.337206	0.0242223	0.886841	-0.149842	0.37606	-0.211051	0.20988	0.175598	0.298541	-0.0802443	0.636843
blue	ENSMUSG00000042638	14917	Gucy2c	guanylate cyclase 2c	-0.253386	0.130228	-0.238003	0.156043	-0.102247	0.547056	-0.419507	0.00974816	0.0780971	0.645915	-0.223135	0.184343	0.00363805	0.982951	-0.036715	0.829194	-0.00104328	0.99511	0.159818	0.34473	0.0161016	0.924643	0.0430655	0.800204	0.0337509	0.842803	-0.130018	0.443088	-0.135226	0.424876	-0.211434	0.209037	0.196747	0.243153
blue	ENSMUSG00000031884	NA	NA	NA	0.369484	0.0244074	0.202694	0.228914	0.239853	0.152756	0.417819	0.0100772	-0.301305	0.0699495	0.313466	0.0588622	0.293997	0.0773618	-0.26994	0.106141	-0.208336	0.21594	-0.198299	0.239382	-0.237432	0.157068	-0.156603	0.354649	-0.0293542	0.863073	0.163874	0.332463	0.0188373	0.911886	0.0130215	0.939028	-0.251909	0.13256
blue	ENSMUSG00000115846	NA	NA	NA	-0.181571	0.282143	0.00928331	0.956512	0.0659535	0.69814	-0.60865	6.42e-05	0.18521	0.272444	-0.149617	0.376783	-0.217707	0.195528	0.167819	0.320793	0.472838	0.00312329	0.184508	0.2743	-0.0455531	0.788917	0.021294	0.900449	0.0360015	0.832465	0.0213184	0.900335	-0.219349	0.192095	-0.0918954	0.588549	-0.0304518	0.858005
blue	ENSMUSG00000035948	380660	Acss3	acyl-CoA synthetase short-chain family member 3	0.840972	7.27e-11	0.589067	0.000125231	0.561497	0.000299423	0.865473	4.77e-12	-0.672625	5.11e-06	0.577508	0.000182201	0.521535	0.000932271	-0.504947	0.00143586	-0.514879	0.00111159	-0.302565	0.0687302	-0.101785	0.548878	0.204393	0.224953	-0.0511532	0.763666	0.149504	0.377148	0.24409	0.145418	0.0377606	0.824404	0.0100554	0.952899
blue	ENSMUSG00000105708	NA	NA	NA	-0.2087	0.21512	-0.0920547	0.587901	-0.0375791	0.825235	-0.328551	0.0470993	0.105881	0.532825	-0.203684	0.2266	-0.090999	0.592207	0.14954	0.377032	0.0740483	0.663158	0.138341	0.414185	0.0710607	0.675992	-0.0213501	0.900188	0.161699	0.339006	0.0957155	0.573075	0.104373	0.53871	-0.0466663	0.78388	0.265693	0.111971
blue	ENSMUSG00000027186	13711	Elf5	E74-like factor 5	0.0570109	0.737509	0.0251168	0.882691	0.311506	0.0605478	0.311587	0.0604779	-0.084242	0.620093	-0.0566789	0.738984	0.0854556	0.615044	-0.0532024	0.754485	-0.193373	0.251493	0.157025	0.353336	-0.0530666	0.755092	-0.266707	0.110558	-0.163831	0.332591	0.0972795	0.566794	0.217046	0.196921	0.0908704	0.592733	-0.0900217	0.596206
blue	ENSMUSG00000000204	20558	Slfn4	schlafen 4	-0.439767	0.00645937	-0.186017	0.270324	-0.282647	0.0900715	-0.709695	8.73e-07	0.567708	0.00024769	-0.123754	0.465548	-0.525586	0.000836148	0.622301	3.92e-05	0.670316	5.66e-06	0.296946	0.0743007	0.14734	0.384171	-0.00873794	0.959065	-0.0214933	0.899522	0.0114336	0.946452	0.0432696	0.799276	0.171654	0.309697	-0.123532	0.466355
blue	ENSMUSG00000021986	72125	Amer2	APC membrane recruitment 2	0.357902	0.0296352	0.138449	0.413817	0.186123	0.270047	0.648096	1.44e-05	-0.363429	0.0270364	0.0882428	0.603515	0.245527	0.142988	-0.486475	0.00226576	-0.47203	0.00318193	-0.315922	0.0568026	0.0656997	0.699247	0.312685	0.0595294	-0.24424	0.145163	-0.0739568	0.663549	0.00520055	0.97563	-0.197832	0.240512	-0.0805972	0.635357
blue	ENSMUSG00000045868	74558	Gvin1	GTPase, very large interferon inducible 1	-0.439373	0.00651278	-0.155989	0.356562	-0.105955	0.532536	-0.651701	1.25e-05	0.370569	0.0239597	-0.176057	0.297261	-0.203959	0.225961	0.234263	0.162845	0.452382	0.00493646	0.572139	0.00021584	-0.0493318	0.771854	-0.0625196	0.713172	-0.172378	0.30763	-0.323311	0.0509496	0.353034	0.0320919	0.0358892	0.83298	0.0143451	0.932844
blue	ENSMUSG00000110239	108167329	Gm45620	predicted gene 45620	0.365741	0.0260063	0.190214	0.25947	-0.0160058	0.92509	0.438052	0.00669463	-0.233277	0.164673	0.305706	0.0657624	0.417074	0.0102255	-0.220724	0.189254	-0.374335	0.0224579	-0.237367	0.157186	-0.199978	0.235345	-0.230051	0.170758	0.0860606	0.612534	0.0846803	0.618267	-0.0183422	0.914194	0.197361	0.241656	0.0981348	0.563372
blue	ENSMUSG00000073460	240023	Pnldc1	poly(A)-specific ribonuclease (PARN)-like domain containing 1	0.838118	9.69e-11	0.643926	1.71e-05	0.450423	0.0051504	0.76409	3.74e-08	-0.682261	3.31e-06	0.83751	1.03e-10	0.75788	5.58e-08	-0.586916	0.000134425	-0.375401	0.022047	-0.315796	0.0569067	-0.390602	0.0168386	0.202425	0.229547	-0.0958719	0.572446	0.0727172	0.668865	0.18925	0.261935	0.173818	0.303543	-0.101378	0.550483
blue	ENSMUSG00000038128	12326	Camk4	calcium/calmodulin-dependent protein kinase IV	0.542664	0.000520472	0.304243	0.0671316	0.179825	0.286875	0.569251	0.000236148	-0.401126	0.0138733	0.275734	0.098564	0.369052	0.0245878	-0.377102	0.0214047	-0.270141	0.105871	-0.395111	0.015509	-0.138258	0.414469	0.25635	0.125642	0.00735236	0.965552	0.151157	0.371836	0.0344953	0.839381	0.0752134	0.658178	0.0632093	0.710144
blue	ENSMUSG00000005553	11944	Atp4a	ATPase, H+/K+ exchanging, gastric, alpha polypeptide	-0.553743	0.000377466	-0.543975	0.000501347	-0.29186	0.0796412	-0.754121	7.07e-08	0.543716	0.000505076	-0.386135	0.0182492	-0.339589	0.0397537	0.332993	0.0440222	0.458984	0.00427129	0.318146	0.0549871	0.0236069	0.889699	-0.238656	0.154878	0.00944523	0.955754	-0.0872977	0.607414	-0.21715	0.196701	-0.0019641	0.990795	0.0167458	0.921637
blue	ENSMUSG00000046167	235379	Gldn	gliomedin	-0.45223	0.00495286	-0.255793	0.126495	-0.63134	2.79e-05	-0.510379	0.00124949	0.330934	0.0454275	-0.142403	0.400475	-0.171332	0.31062	0.374851	0.0222583	0.4205	0.00955884	-0.111819	0.509963	-0.095598	0.573548	-0.183709	0.27642	0.359629	0.0288021	-0.0229495	0.892752	-0.302459	0.0688317	0.178603	0.290218	0.0426258	0.802203
blue	ENSMUSG00000089636	NA	NA	NA	-0.412621	0.0111506	-0.139387	0.41063	-0.143858	0.395631	-0.371545	0.0235626	0.0723204	0.670569	-0.407847	0.0122208	-0.236819	0.158175	0.310845	0.0611252	0.259908	0.120297	0.433414	0.00736847	0.128063	0.450034	-0.0411392	0.808971	-0.032839	0.847	0.16313	0.334692	0.390447	0.0168859	0.0440903	0.795549	-0.0613175	0.71846
blue	ENSMUSG00000047787	396184	Flrt1	fibronectin leucine rich transmembrane protein 1	-0.236093	0.159491	-0.105964	0.532502	-0.276164	0.0980185	-0.434561	0.0071966	0.4456	0.00571128	-0.0390337	0.818581	-0.45742	0.00442146	0.490143	0.00207372	0.458048	0.00436063	0.250537	0.134752	0.332811	0.0441447	0.306891	0.0646694	0.0729554	0.667842	0.263002	0.115788	0.0214641	0.899658	0.124667	0.462239	0.157387	0.352215
blue	ENSMUSG00000107304	NA	NA	NA	0.431519	0.00765998	0.0196345	0.908173	0.058914	0.729071	0.470098	0.00332617	-0.193699	0.250677	0.206635	0.219798	0.280875	0.0921923	-0.533798	0.000667794	-0.403698	0.0132199	-0.426636	0.00845731	0.0731336	0.667077	0.545072	0.000485827	-0.141664	0.40295	-0.0825552	0.627138	-0.184899	0.273266	-0.292672	0.078769	0.256918	0.124777
blue	ENSMUSG00000074647	71405	Fam83c	family with sequence similarity 83, member C	-0.312591	0.0596102	-0.161017	0.341075	-0.543732	0.000504849	-0.502835	0.00151472	0.278855	0.0946574	-0.131693	0.437184	-0.299911	0.0713185	0.518799	0.00100263	0.390679	0.0168153	0.166961	0.323307	0.0679021	0.689659	-0.195891	0.245251	0.335285	0.0424991	0.07541	0.657339	-0.152083	0.368878	0.195348	0.246589	0.205958	0.221346
blue	ENSMUSG00000087638	NA	NA	NA	0.398943	0.0144494	0.418203	0.0100015	0.348125	0.0347354	0.325648	0.0492027	-0.257243	0.124283	0.0597073	0.725564	-0.084194	0.620293	0.0234449	0.890451	-0.173117	0.305528	-0.113208	0.504688	0.174131	0.302661	-0.167426	0.321943	-0.0789783	0.642186	0.0631146	0.710559	0.115623	0.49558	-0.0266356	0.875651	-0.212295	0.207146
blue	ENSMUSG00000099759	69513	1700030C10Rik	RIKEN cDNA 1700030C10 gene	0.171382	0.310474	0.00214669	0.989939	-0.155568	0.357876	-0.12561	0.458832	-0.053294	0.754075	0.0782312	0.645347	0.0914851	0.590222	0.0277958	0.87028	0.0277033	0.870707	-0.126336	0.456219	-0.169443	0.316065	-0.202567	0.229213	0.0236299	0.889592	-0.0557778	0.742992	-0.293577	0.0778057	0.0409934	0.809636	0.150328	0.374493
blue	ENSMUSG00000020805	237831	Slc13a5	solute carrier family 13 (sodium-dependent citrate transporter), member 5	-0.551343	0.00040505	-0.30006	0.0711718	-0.305911	0.0655723	-0.851899	2.29e-11	0.418745	0.00989559	-0.225764	0.179091	-0.295467	0.0758241	0.402979	0.0133999	0.68496	2.92e-06	0.261189	0.118414	-0.0989505	0.560117	-0.120758	0.4765	0.0570076	0.737524	-0.0946265	0.577468	-0.233579	0.164112	0.118251	0.485766	-0.114214	0.500884
blue	ENSMUSG00000029372	57349	Ppbp	pro-platelet basic protein	-0.144347	0.394009	-0.0476851	0.779277	0.17123	0.310913	-0.325297	0.0494615	0.281712	0.0911856	0.0355888	0.834359	-0.0116432	0.945472	0.0432252	0.799478	0.120451	0.477632	0.346491	0.035654	-0.0571726	0.736791	0.1165	0.492295	-0.223759	0.183087	-0.218004	0.194904	0.171268	0.310801	0.00471342	0.977912	0.19569	0.245745
blue	ENSMUSG00000001493	17285	Meox1	mesenchyme homeobox 1	-0.34419	0.0369804	-0.17145	0.31028	0.0252647	0.882005	-0.601175	8.32e-05	0.446212	0.00563723	-0.231245	0.168487	-0.370657	0.0239238	0.354614	0.0312768	0.557952	0.000333104	0.437666	0.00674872	0.012417	0.941854	-0.12306	0.468074	-0.20056	0.233958	-0.00499284	0.976603	0.0626108	0.712771	-0.000549063	0.997427	-0.0599132	0.724654
blue	ENSMUSG00000117653	NA	NA	NA	-0.0969297	0.568196	-0.0210739	0.901472	-0.123469	0.466583	-0.286673	0.0853915	0.169238	0.316658	-0.0851456	0.616332	-0.180624	0.284704	0.237543	0.156868	0.32027	0.0532967	0.160011	0.344138	-0.0502419	0.767759	-0.0746487	0.66059	-0.1499	0.375872	-0.133852	0.429641	0.0332691	0.84502	0.101961	0.548184	0.0461377	0.786271
blue	ENSMUSG00000113370	NA	NA	NA	0.0748353	0.659792	0.0505989	0.766155	0.127757	0.451125	0.282398	0.0903664	-0.284461	0.0879382	-0.176017	0.297372	0.110559	0.514775	-0.151784	0.369832	-0.450426	0.00515001	-0.16515	0.32866	0.140951	0.405347	-0.086905	0.609037	-0.0175174	0.918039	-0.211578	0.208718	-0.085253	0.615886	-0.0634076	0.709274	-0.0995967	0.557545
blue	ENSMUSG00000020399	171285	Havcr2	hepatitis A virus cellular receptor 2	-0.0433492	0.798914	0.0835385	0.623027	0.135003	0.425647	0.146197	0.387911	-0.179457	0.287879	-0.0370866	0.827491	-0.0773713	0.648993	0.148518	0.380339	-0.230854	0.169229	-0.0204708	0.904279	0.241971	0.149056	-0.150261	0.37471	0.0182217	0.914755	0.332032	0.0446737	0.0464781	0.784731	-0.109378	0.5193	0.0923696	0.586619
blue	ENSMUSG00000021259	13116	Cyp46a1	cytochrome P450, family 46, subfamily a, polypeptide 1	0.732827	2.51e-07	0.527617	0.000791325	0.431567	0.00765259	0.925636	2.44e-16	-0.726533	3.56e-07	0.452614	0.00491172	0.631308	2.79e-05	-0.584511	0.00014542	-0.691795	2.12e-06	-0.286931	0.0850978	-0.151039	0.372214	0.135692	0.423268	-0.00456288	0.978617	0.18156	0.282174	0.304632	0.0667656	0.00654646	0.969326	0.0550433	0.746264
blue	ENSMUSG00000110656	319574	Gm20735	predicted gene, 20735	-0.365918	0.0259287	-0.123698	0.46575	-0.229767	0.171301	-0.294995	0.0763157	-0.0256029	0.880437	-0.136975	0.418854	-0.152936	0.366166	0.402316	0.0135678	0.110958	0.513248	0.0324594	0.848748	0.112702	0.506606	-0.243631	0.146201	0.307105	0.0644731	0.297351	0.0738881	0.00936455	0.956132	0.0512645	0.763167	-0.0421122	0.80454
blue	ENSMUSG00000039376	68760	Synpo2l	synaptopodin 2-like	-0.319039	0.054271	-0.312397	0.0597769	-0.237196	0.157494	-0.3957	0.0153418	0.364132	0.0267197	-0.269126	0.107241	-0.364327	0.0266321	0.377392	0.021297	0.193485	0.251211	0.112596	0.50701	0.173395	0.304742	-0.23991	0.152656	-0.0542314	0.749886	-0.307328	0.0642694	-0.209882	0.212475	0.0558158	0.742823	0.0277822	0.870342
blue	ENSMUSG00000116284	102639762	LOC102639762	thymosin beta-10	0.520686	0.000953621	0.135519	0.423865	0.357843	0.0296643	0.772254	2.17e-08	-0.287093	0.0849139	0.412759	0.0111211	0.429255	0.00802125	-0.476757	0.00285185	-0.528483	0.000772884	-0.202628	0.22907	-0.0978095	0.564672	0.136556	0.420293	-0.178076	0.291666	0.0460941	0.786468	0.174756	0.300901	0.0335623	0.843671	0.0446463	0.793026
blue	ENSMUSG00000019139	71780	Isyna1	myo-inositol 1-phosphate synthase A1	-0.661656	8.23e-06	-0.413081	0.011052	-0.392979	0.0161263	-0.850545	2.66e-11	0.604596	7.4e-05	-0.340594	0.0391342	-0.547749	0.000449746	0.755062	6.67e-08	0.726768	3.52e-07	0.268821	0.107655	0.0569704	0.737689	-0.301195	0.070057	0.182888	0.278607	0.00275492	0.987089	-0.181753	0.281654	0.356035	0.0305584	-0.0799481	0.638092
blue	ENSMUSG00000097494	74076	4933406C10Rik	RIKEN cDNA 4933406C10 gene	0.597159	9.55e-05	0.39147	0.0165757	0.154573	0.360996	0.564513	0.000273206	-0.543276	0.000511471	0.477537	0.00280037	0.675993	4.4e-06	-0.52487	0.000852476	-0.390694	0.0168106	-0.273023	0.102057	-0.297974	0.0732563	0.192905	0.252662	0.0844593	0.619187	0.134453	0.427552	0.0119653	0.943966	0.190873	0.257791	0.113873	0.502172
blue	ENSMUSG00000028359	18407	Orm3	orosomucoid 3	-0.0794914	0.640019	-0.245751	0.142613	0.164784	0.329749	-0.411483	0.0113983	0.261062	0.1186	-0.114521	0.499726	-0.070099	0.680143	-0.0245307	0.88541	0.160843	0.341605	0.27042	0.105497	-0.100568	0.55369	-0.0138002	0.935389	-0.455604	0.00460149	-0.547144	0.000457687	-0.0602805	0.723032	-0.0947176	0.5771	0.0681644	0.688521
blue	ENSMUSG00000028354	54418	Fmn2	formin 2	-0.626569	3.34e-05	-0.634563	2.47e-05	-0.44585	0.00568092	-0.830449	2.04e-10	0.756817	5.97e-08	-0.19622	0.244445	-0.276517	0.0975717	0.244574	0.144596	0.583642	0.000149591	0.411747	0.0113403	-0.105463	0.534453	0.0418334	0.805809	-0.134461	0.427526	-0.340253	0.0393433	-0.129877	0.443588	0.00978901	0.954145	0.0757929	0.655707
blue	ENSMUSG00000014030	18507	Pax5	paired box 5	0.521058	0.000944226	0.340976	0.0389004	0.237966	0.156109	0.442037	0.00615873	-0.3937	0.0159153	0.370289	0.0240748	0.417253	0.0101898	-0.379274	0.0206074	-0.28235	0.0904239	0.0842662	0.619992	-0.171359	0.310542	0.252599	0.131466	-0.287193	0.0848001	-0.175031	0.300129	0.422936	0.00910779	0.0423536	0.803441	0.141967	0.401934
blue	ENSMUSG00000034780	26877	B3galt1	UDP-Gal:betaGlcNAc beta 1,3-galactosyltransferase, polypeptide 1	-0.33976	0.039648	-0.296601	0.0746533	-0.170059	0.314282	-0.520004	0.000971079	0.254858	0.127936	-0.154178	0.362242	-0.135812	0.422852	0.148817	0.37937	0.235656	0.160287	0.18136	0.282713	0.0796487	0.639355	0.0387656	0.819806	0.0176301	0.917513	-0.209092	0.214241	-0.0645408	0.704311	-0.0042146	0.980249	0.121394	0.474163
blue	ENSMUSG00000109051	NA	NA	NA	-0.31143	0.0606142	-0.0355668	0.83446	-0.128462	0.448611	-0.467422	0.00353523	0.189051	0.262447	-0.115091	0.49758	-0.164546	0.330457	0.43205	0.00757731	0.40057	0.0140183	0.0683955	0.687518	-0.0772648	0.649445	-0.250962	0.134071	0.216596	0.197875	-0.047643	0.779467	-0.0880912	0.60414	0.325965	0.0489688	-0.0615479	0.717445
blue	ENSMUSG00000089417	NA	NA	NA	0.113341	0.504183	0.196086	0.244772	0.0319564	0.851065	0.427546	0.00830364	-0.165446	0.32778	0.131278	0.438644	0.0647669	0.703322	0.0806591	0.635097	-0.324333	0.0501794	-0.121322	0.474428	0.19729	0.241829	-0.105455	0.534483	0.0939452	0.580223	0.299936	0.0712944	0.264605	0.113503	0.161206	0.3405	0.00839271	0.960681
blue	ENSMUSG00000019935	216227	Slc17a8	solute carrier family 17 (sodium-dependent inorganic phosphate cotransporter), member 8	0.685121	2.9e-06	0.475281	0.00295154	0.399679	0.014253	0.911349	4.71e-15	-0.548347	0.000442011	0.497129	0.00174704	0.488864	0.00213898	-0.513067	0.00116542	-0.602304	8.01e-05	-0.394395	0.0157139	-0.0585129	0.730847	0.120509	0.477418	0.115352	0.496599	0.344976	0.036523	0.144077	0.394903	-0.0863089	0.611505	0.0604904	0.722106
blue	ENSMUSG00000000869	16189	Il4	interleukin 4	0.259864	0.120361	0.29548	0.0758108	0.173121	0.305519	0.160516	0.3426	-0.165131	0.328715	0.174199	0.302469	-0.128332	0.449075	0.0881628	0.603845	0.185437	0.271846	0.00673934	0.968422	0.163032	0.334985	0.32521	0.0495258	-0.112325	0.508037	0.35055	0.0334079	0.206102	0.221015	0.0530499	0.755167	-0.246223	0.141824
blue	ENSMUSG00000106980	NA	NA	NA	0.293069	0.0783462	0.220941	0.188809	0.0786059	0.643761	0.438512	0.00663083	-0.322182	0.0518113	0.022316	0.895696	0.296209	0.0750569	-0.202618	0.229094	-0.529145	0.000759041	-0.417393	0.0101618	-0.0471013	0.781914	-0.38487	0.0186662	0.457058	0.00445682	0.219731	0.191302	-0.179659	0.287327	-0.0678077	0.690069	0.467517	0.00352767
blue	ENSMUSG00000029352	12962	Crybb3	crystallin, beta B3	-0.471164	0.00324588	-0.338005	0.0407471	-0.303933	0.0674243	-0.814859	8.34e-10	0.413806	0.0108978	-0.190328	0.259178	-0.140596	0.406541	0.331549	0.045004	0.648805	1.4e-05	0.395415	0.0154226	-0.286654	0.0854132	-0.143514	0.396772	-0.0957912	0.572771	-0.379432	0.0205502	-0.078985	0.642158	0.301798	0.0694699	-0.110217	0.516082
blue	ENSMUSG00000053141	19281	Ptprt	protein tyrosine phosphatase, receptor type, T	0.0285694	0.866701	-0.086265	0.611687	0.00110371	0.994827	0.289816	0.0818704	-0.0763861	0.65318	-0.105353	0.53488	0.0180051	0.915765	-0.15285	0.366441	-0.275175	0.099276	0.141798	0.402502	0.153417	0.364643	0.0994556	0.558107	-0.109405	0.519198	0.0147989	0.930725	0.27017	0.105832	-0.249043	0.137171	0.109759	0.517839
blue	ENSMUSG00000026347	72160	Tmem163	transmembrane protein 163	0.367821	0.0251076	0.130462	0.441521	0.259885	0.120331	0.468166	0.00347604	-0.200941	0.233051	0.23463	0.16217	0.407215	0.0123687	-0.507142	0.00135779	-0.37807	0.0210462	-0.0790457	0.641901	-0.131151	0.439091	0.3503	0.0335427	-0.234256	0.162858	-0.194365	0.249021	0.15533	0.358621	-0.0016585	0.992227	0.319898	0.0535902
blue	ENSMUSG00000024388	17922	Myo7b	myosin VIIB	-0.162309	0.337164	-0.203921	0.226048	-0.0509191	0.764717	-0.247462	0.139766	0.253816	0.129556	-0.0833997	0.623607	0.0170761	0.920097	0.0652141	0.701367	0.197881	0.240394	0.247581	0.139569	-0.253318	0.130334	-0.315306	0.0573137	-0.160193	0.343585	-0.134085	0.428829	0.107533	0.526415	0.0701124	0.680085	0.00473389	0.977816
blue	ENSMUSG00000074398	100038464	Gm15441	predicted gene 15441	0.348478	0.0345396	0.111963	0.509414	-0.039743	0.81534	0.461767	0.00401506	-0.131385	0.438268	0.520421	0.000960387	0.257739	0.123534	-0.136109	0.421828	-0.183034	0.278218	-0.28148	0.0914634	-0.0357018	0.83384	0.147208	0.384602	0.0299246	0.860438	0.259591	0.120765	-0.0371585	0.827161	0.171032	0.31148	0.210388	0.21135
blue	ENSMUSG00000040570	242819	Rundc3b	RUN domain containing 3B	0.365733	0.0260097	0.419334	0.00978138	0.321132	0.052623	0.389911	0.0170507	-0.4214	0.00939002	-0.138476	0.413724	-0.0932462	0.583057	-0.0104914	0.950859	-0.419521	0.00974552	-0.150513	0.373899	0.400788	0.0139612	0.0984906	0.561951	0.0211376	0.901176	0.361219	0.0280518	0.286311	0.0858045	-0.212682	0.206299	0.10383	0.540833
blue	ENSMUSG00000041617	72315	Ccdc74a	coiled-coil domain containing 74A	-0.242724	0.147756	-0.197059	0.242391	-0.112794	0.506257	-0.428507	0.00814374	0.442277	0.00612771	-0.22904	0.172698	-0.420604	0.00953917	0.487843	0.00219243	0.441735	0.00619803	0.144823	0.392435	0.211358	0.209204	0.0909354	0.592467	0.310532	0.0614002	0.319255	0.0540993	0.0038498	0.981958	0.206266	0.220641	0.347354	0.0351661
blue	ENSMUSG00000030745	60504	Il21r	interleukin 21 receptor	0.151167	0.371803	0.218653	0.193545	0.153065	0.365758	0.296285	0.0749786	-0.1949	0.247694	0.178413	0.29074	0.364641	0.0264921	-0.306258	0.0652515	-0.0982691	0.562836	0.120695	0.476732	-0.275294	0.0991247	0.0830527	0.625057	-0.00703133	0.967055	-0.0240686	0.887555	0.384638	0.0187433	0.127255	0.45292	0.129285	0.445687
blue	ENSMUSG00000114469	320155	C730002L08Rik	RIKEN cDNA C730002L08 gene	0.76116	4.52e-08	0.447546	0.00547888	0.387064	0.0179481	0.77015	2.5e-08	-0.518324	0.00101529	0.680899	3.52e-06	0.659622	8.97e-06	-0.70636	1.03e-06	-0.540728	0.000549909	-0.363474	0.027016	-0.225232	0.180147	0.258196	0.122847	-0.0879477	0.604732	0.00870501	0.959219	0.0295359	0.862234	-0.113471	0.50369	0.0260702	0.878271
blue	ENSMUSG00000071661	75291	Zbtb3	zinc finger and BTB domain containing 3	-0.257181	0.124377	-0.0342077	0.840703	-0.214745	0.201829	-0.327847	0.0476029	0.197141	0.242193	-0.18782	0.265624	-0.330445	0.0457666	0.339739	0.039661	0.301848	0.0694215	0.471804	0.0031985	0.130324	0.442008	-0.0332148	0.84527	-0.0725014	0.669791	0.0904341	0.594517	0.439574	0.00648546	-0.0172365	0.919349	-0.0849879	0.616987
blue	ENSMUSG00000040978	626870	Gm11992	predicted gene 11992	0.683321	3.15e-06	0.52511	0.00084697	0.307263	0.0643293	0.819443	5.59e-10	-0.684536	2.98e-06	0.617648	4.65e-05	0.660388	8.69e-06	-0.580962	0.000163128	-0.456526	0.0045093	-0.240158	0.152219	-0.259502	0.120898	0.23134	0.168308	-0.0234687	0.89034	0.140045	0.408402	0.355962	0.030595	0.0484312	0.775911	-0.187462	0.266553
blue	ENSMUSG00000034783	246278	Cd207	CD207 antigen	-0.440028	0.00642416	-0.258466	0.122442	-0.337152	0.0412902	-0.428103	0.00821057	0.448736	0.00534092	-0.196613	0.24348	-0.405343	0.0128158	0.457767	0.00438773	0.457081	0.00445455	0.420699	0.00952136	0.103238	0.543156	-0.126504	0.455615	0.1036	0.541735	0.190964	0.25756	-0.0180842	0.915396	0.0654705	0.700247	0.108537	0.522539
blue	ENSMUSG00000020897	20877	Aurkb	aurora kinase B	-0.050303	0.767485	0.264169	0.114121	0.011138	0.947834	-0.180063	0.286229	0.0782322	0.645343	0.109859	0.517456	-0.170172	0.313955	0.190121	0.259706	0.242865	0.147512	0.187289	0.267003	0.107919	0.524923	0.121496	0.473788	-0.123821	0.465305	0.122279	0.470925	0.233197	0.164823	0.0725411	0.669621	0.0192437	0.909993
blue	ENSMUSG00000034910	72135	Pygo1	pygopus 1	0.284138	0.0883155	0.431546	0.00765582	0.347867	0.0348792	0.234423	0.16255	-0.243212	0.146916	0.344414	0.0368496	0.251254	0.133603	-0.127531	0.451934	-0.078361	0.644798	-0.113297	0.50435	-0.0101536	0.952439	0.185184	0.272512	0.261978	0.117267	0.381515	0.0198106	0.051715	0.761146	0.0970487	0.567719	0.383568	0.0191035
blue	ENSMUSG00000102324	NA	NA	NA	-0.169175	0.316841	-0.33892	0.0401707	-0.247226	0.140155	-0.373915	0.0226214	0.400354	0.0140749	-0.0819723	0.62958	-0.209083	0.214261	0.281141	0.091871	0.425533	0.00864698	0.135767	0.423009	-0.0627143	0.712317	0.105826	0.533038	0.0254924	0.880949	-0.0526944	0.756757	-0.0869803	0.608726	0.268918	0.107523	0.00642918	0.969875
blue	ENSMUSG00000100937	75555	1700020D05Rik	RIKEN cDNA 1700020D05 gene	-0.120393	0.477845	0.0988248	0.560618	0.171041	0.311454	-0.14778	0.382738	0.166438	0.324848	-0.136703	0.419788	-0.218098	0.194707	0.161108	0.340799	0.11788	0.487147	0.234137	0.163079	0.197012	0.242506	0.0229273	0.892855	-0.0328862	0.846783	0.108349	0.523262	0.286677	0.0853868	-0.0533836	0.753674	0.108548	0.522497
blue	ENSMUSG00000024957	16528	Kcnk4	potassium channel, subfamily K, member 4	0.264348	0.113866	0.174995	0.300231	0.1535	0.36438	0.335098	0.0426215	-0.316194	0.0565777	0.271428	0.104154	0.387099	0.0179367	-0.209774	0.212717	-0.477682	0.0027909	-0.503794	0.00147843	-0.0879052	0.604907	-0.109407	0.519189	0.235961	0.159731	0.125153	0.46048	-0.193295	0.251685	0.0451516	0.790736	0.239478	0.153418
blue	ENSMUSG00000078439	72273	Smim24	small integral membrane protein 24	0.100223	0.555059	0.08666	0.610051	0.209662	0.212966	0.307955	0.0636997	-0.199996	0.235303	-0.105875	0.532846	0.0914329	0.590435	-0.164683	0.330046	-0.368997	0.0246108	0.316315	0.0564784	0.0995173	0.557861	-0.161898	0.338404	-0.10822	0.523761	0.220542	0.189628	0.613165	5.46e-05	-0.24955	0.136347	0.0166943	0.921878
blue	ENSMUSG00000032172	244723	Olfm2	olfactomedin 2	0.619423	4.36e-05	0.423153	0.00906845	0.328038	0.0474656	0.622879	3.84e-05	-0.563583	0.000281061	0.323967	0.0504544	0.575085	0.000196751	-0.546216	0.000470108	-0.529441	0.000752931	-0.229367	0.172068	-0.162547	0.336445	0.18009	0.286153	-0.035376	0.835336	-0.0285838	0.866634	0.193499	0.251177	0.0580222	0.733021	-0.0231292	0.891917
blue	ENSMUSG00000038768	619326	9130409I23Rik	RIKEN cDNA 9130409I23 gene	0.710423	8.41e-07	0.41367	0.0109265	0.349346	0.0340615	0.775987	1.68e-08	-0.453164	0.0048533	0.610071	6.1e-05	0.433465	0.00736076	-0.538864	0.000579645	-0.410061	0.011714	-0.243318	0.146736	-0.118805	0.483712	0.204414	0.224904	-0.145214	0.391144	0.136788	0.419495	0.11922	0.482176	-0.129302	0.445625	-0.081125	0.633138
blue	ENSMUSG00000031963	73230	Bmper	BMP-binding endothelial regulator	-0.226398	0.177841	-0.0304026	0.858232	0.1171	0.490052	-0.349253	0.0341124	0.140735	0.406073	-0.188509	0.263843	-0.125033	0.460913	0.0248999	0.883697	0.253484	0.130074	0.332665	0.0442439	0.0149346	0.930091	0.146591	0.38662	-0.193206	0.25191	0.161688	0.33904	0.247057	0.140435	-0.117895	0.48709	-0.0991741	0.559227
blue	ENSMUSG00000084941	100302648	Gm11944	predicted gene 11944	0.291499	0.0800319	0.229944	0.170962	0.162277	0.337259	0.395498	0.0153989	-0.394207	0.0157681	0.128245	0.449383	0.270915	0.104837	-0.183846	0.276054	-0.309779	0.0620647	-0.195199	0.246956	0.0608742	0.720413	0.262319	0.116772	0.074688	0.660422	0.113625	0.503109	0.125948	0.457612	0.10605	0.532169	0.156752	0.354183
blue	ENSMUSG00000107610	NA	NA	NA	0.253096	0.130683	0.285028	0.08728	0.212371	0.206978	0.291413	0.080125	-0.131146	0.439109	0.202387	0.229635	0.146877	0.385684	-0.208214	0.216215	-0.341033	0.0388661	-0.189988	0.260047	0.0673163	0.692205	-0.0112732	0.947202	0.0775346	0.6483	0.0732161	0.666723	-0.0802482	0.636827	-0.206042	0.221153	0.30198	0.0692938
blue	ENSMUSG00000052560	66871	Cpne8	copine VIII	-0.574006	0.000203561	-0.36017	0.0285451	-0.266713	0.11055	-0.886324	2.98e-13	0.539199	0.000574192	-0.296811	0.0744384	-0.448089	0.00541553	0.533501	0.000673306	0.660365	8.69e-06	0.386715	0.0180606	0.0132839	0.937802	-0.256109	0.12601	0.0616312	0.717079	-0.0529201	0.755747	-0.128992	0.446727	0.0705029	0.678398	-0.0189316	0.911447
blue	ENSMUSG00000079495	100504710	Nat8f6	N-acetyltransferase 8 (GCN5-related) family member 6	0.0158969	0.925598	-0.0384536	0.821233	-0.126756	0.454709	0.166064	0.325953	0.102481	0.546135	0.0814963	0.631578	-0.109624	0.518355	0.106037	0.532216	-0.122973	0.468389	-0.171962	0.308817	0.134405	0.427717	-0.288154	0.0837179	0.359166	0.0290234	0.250458	0.13488	-0.317929	0.0551621	-0.13347	0.430971	0.13396	0.429263
blue	ENSMUSG00000027955	68659	Gask1b	golgi associated kinase 1B	0.269203	0.107137	0.303783	0.067567	0.420228	0.00961032	0.230404	0.170084	-0.126744	0.454751	0.24483	0.144163	-0.041483	0.807405	0.0231768	0.891696	0.0128768	0.939704	-0.107746	0.52559	0.0213346	0.90026	0.0417386	0.80624	0.0584883	0.730956	0.455691	0.00459264	0.121041	0.475461	-0.042299	0.80369	-0.0486608	0.774876
blue	ENSMUSG00000114512	NA	NA	NA	0.460889	0.00409441	0.232158	0.166767	0.350166	0.0336152	0.519328	0.000988658	-0.208626	0.215288	0.484658	0.00236659	0.578535	0.000176332	-0.569049	0.000237637	-0.325291	0.0494657	-0.151801	0.369778	-0.20804	0.216608	0.534343	0.000657758	-0.00592443	0.972239	-0.00411936	0.980695	0.13894	0.412148	0.142976	0.398562	0.432205	0.00755329
blue	ENSMUSG00000063564	237759	Col23a1	collagen, type XXIII, alpha 1	0.493289	0.0019205	0.337709	0.0409348	0.27674	0.0972912	0.517857	0.00102791	-0.30237	0.0689176	0.417542	0.0101321	0.369742	0.0243006	-0.347182	0.0352627	-0.372887	0.0230258	-0.136233	0.421403	-0.00881502	0.958704	0.280494	0.092653	0.146028	0.388465	0.29376	0.0776126	0.0371201	0.827337	0.0764258	0.653011	0.28619	0.0859422
blue	ENSMUSG00000106030	NA	NA	NA	0.161426	0.339834	0.161024	0.341055	0.0159216	0.925483	0.341281	0.0387149	-0.347055	0.0353345	0.0663541	0.696393	0.349423	0.0340198	-0.235593	0.160403	-0.503983	0.0014714	-0.099237	0.558977	-0.0307636	0.856566	-0.342553	0.0379488	0.292054	0.0794326	0.0694499	0.68295	0.0531938	0.754523	-0.0715408	0.673923	0.477406	0.00280895
blue	ENSMUSG00000116898	NA	NA	NA	0.35419	0.0314939	0.257704	0.123587	0.141992	0.401853	0.380776	0.0200703	-0.33401	0.0433411	0.420957	0.0094727	0.399927	0.0141872	-0.193891	0.250199	-0.271729	0.103757	-0.213103	0.205381	-0.241416	0.15002	-0.207492	0.217848	0.135998	0.422212	0.0439069	0.796382	-0.0670697	0.693277	0.156306	0.355574	0.00318704	0.985064
blue	ENSMUSG00000083478	NA	NA	NA	0.0510237	0.764247	0.135204	0.424952	0.0798852	0.638357	0.408445	0.0120821	-0.435706	0.00702858	-0.102085	0.547694	0.033832	0.84243	-0.0145115	0.932067	-0.496214	0.00178708	-0.235564	0.160456	0.269227	0.107104	-0.243117	0.147081	0.195701	0.245719	0.34767	0.0349891	0.19716	0.242146	-0.208586	0.215378	-0.118808	0.4837
blue	ENSMUSG00000020732	58222	Rab37	RAB37, member RAS oncogene family	-0.239989	0.152518	-0.128855	0.447212	-0.121508	0.473744	-0.497946	0.00171198	0.406172	0.012616	-0.103115	0.543641	-0.352238	0.0325088	0.37892	0.0207354	0.446079	0.00565334	0.45354	0.0048137	0.117454	0.488732	0.0437196	0.797232	-0.234866	0.161735	-0.0135292	0.936656	0.286725	0.0853323	0.0631735	0.710301	-0.00254184	0.988087
blue	ENSMUSG00000025656	236915	Arhgef9	CDC42 guanine nucleotide exchange factor (GEF) 9	0.806593	1.67e-09	0.566419	0.000257712	0.449437	0.00526095	0.890272	1.66e-13	-0.820878	4.92e-10	0.559338	0.000319552	0.732359	2.57e-07	-0.704982	1.11e-06	-0.660597	8.61e-06	-0.388374	0.0175304	-0.230165	0.17054	0.214859	0.201583	-0.0187144	0.912459	0.0588041	0.729558	0.186843	0.268163	-0.053886	0.751429	-3.5e-05	0.999836
blue	ENSMUSG00000117628	NA	NA	NA	0.255231	0.12736	0.0253346	0.881681	0.214841	0.201622	0.129936	0.443379	-0.0312406	0.854365	0.0304318	0.858097	-0.070934	0.676538	-0.0153776	0.928023	0.0778154	0.647109	0.121295	0.474527	0.0428974	0.800968	0.293095	0.0783185	-0.260565	0.119329	0.099986	0.555999	0.199239	0.237116	0.0574841	0.735408	-0.295392	0.0759023
blue	ENSMUSG00000020651	23985	Slc26a4	solute carrier family 26, member 4	0.590303	0.000120208	0.31304	0.0592252	0.447889	0.0054388	0.78	1.27e-08	-0.584134	0.000147217	0.196256	0.244356	0.442777	0.00606343	-0.651325	1.27e-05	-0.558152	0.000331123	-0.180895	0.28397	-0.0943442	0.578609	0.258203	0.122836	-0.154197	0.36218	-0.0564924	0.739813	0.208246	0.216144	-0.234543	0.162329	-0.0133424	0.937528
blue	ENSMUSG00000037994	97086	Slc9b2	solute carrier family 9, subfamily B (NHA2, cation proton antiporter 2), member 2	0.242498	0.148145	0.299544	0.0716828	0.0150995	0.929321	0.14002	0.408487	-0.249436	0.136532	0.0976539	0.565295	0.270585	0.105277	-0.245	0.143877	-0.32602	0.0489285	-0.0411957	0.808714	-0.016426	0.923129	0.000187358	0.999122	-0.0735262	0.665394	-0.208866	0.214749	0.134645	0.426887	-0.0865255	0.610607	0.158558	0.348597
blue	ENSMUSG00000032271	18113	Nnmt	nicotinamide N-methyltransferase	-0.359623	0.0288048	-0.320948	0.0527662	-0.106441	0.530648	-0.763887	3.79e-08	0.547378	0.000454594	-0.101671	0.549328	-0.244	0.145572	0.232605	0.165929	0.54266	0.000520543	0.280412	0.0927522	-0.125706	0.458486	-0.0509169	0.764727	-0.218914	0.193	-0.393674	0.0159228	-0.19792	0.240299	0.0312389	0.854373	-0.00332056	0.984438
blue	ENSMUSG00000031594	234199	Fgl1	fibrinogen-like protein 1	-0.624949	3.55e-05	-0.400537	0.0140267	-0.297799	0.0734331	-0.920861	6.97e-16	0.583229	0.000151608	-0.399847	0.0142083	-0.461797	0.00401241	0.46579	0.00366832	0.578943	0.000174047	0.336602	0.0416432	0.0594625	0.726645	-0.195324	0.246647	-0.0403501	0.81257	-0.19244	0.253829	-0.189795	0.26054	-0.0433456	0.798931	0.0297171	0.861397
blue	ENSMUSG00000034161	20289	Scx	scleraxis	-0.333075	0.0439666	-0.110812	0.513807	-0.307038	0.0645346	-0.483302	0.0024443	0.363566	0.0269741	-0.342605	0.0379173	-0.532407	0.000693991	0.532412	0.000693898	0.425926	0.00857898	0.218924	0.192979	0.360203	0.0285297	0.291915	0.0795824	-0.00193477	0.990932	0.0255433	0.880713	0.137029	0.41867	0.170877	0.311924	-0.0343715	0.83995
blue	ENSMUSG00000028464	22004	Tpm2	tropomyosin 2, beta	0.493645	0.00190383	0.310013	0.0618575	0.248331	0.138334	0.557606	0.000336568	-0.365748	0.0260034	0.304745	0.0666595	0.0949625	0.576111	0.063451	0.709084	-0.151739	0.369974	-0.195218	0.246909	0.067747	0.690333	0.13178	0.436881	0.0173057	0.919026	0.457924	0.00437256	0.218883	0.193064	0.328589	0.0470722	-0.169823	0.314964
blue	ENSMUSG00000086446	71161	Prkag2os1	protein kinase, AMP-activated, gamma 2 non-catalytic subunit, opposite strand 1	0.276372	0.0977557	-0.0402412	0.813066	0.0357448	0.833643	0.195634	0.245884	-0.158734	0.348053	0.02859	0.866606	-0.0291399	0.864064	0.116208	0.493388	-0.19437	0.249008	-0.137564	0.416839	0.154697	0.360607	0.0241824	0.887026	-0.0533721	0.753726	0.148908	0.379074	-0.0883283	0.603163	0.126511	0.45559	-0.0913237	0.590881
blue	ENSMUSG00000057933	14858	Gsta2	glutathione S-transferase, alpha 2 (Yc2)	0.422278	0.00922779	0.197331	0.241729	0.118057	0.486488	0.634646	2.46e-05	-0.336054	0.0419972	0.358583	0.0293047	0.14358	0.396552	-0.145882	0.388944	-0.238446	0.155253	-0.0575733	0.735012	0.0663355	0.696474	0.198733	0.238334	-0.16791	0.320525	0.137755	0.416183	0.14644	0.387114	0.110189	0.51619	-0.133776	0.429902
blue	ENSMUSG00000024411	11829	Aqp4	aquaporin 4	0.596832	9.66e-05	0.368395	0.0248642	0.207822	0.217101	0.672926	5.04e-06	-0.57053	0.000226956	0.373757	0.0226832	0.587173	0.000133296	-0.682772	3.23e-06	-0.518249	0.00101732	-0.143669	0.396257	-0.2228	0.18502	0.237155	0.157567	-0.247056	0.140437	-0.224597	0.18141	0.197875	0.240408	-0.168075	0.320043	0.0128079	0.940027
blue	ENSMUSG00000055675	74901	Kbtbd11	kelch repeat and BTB (POZ) domain containing 11	0.613953	5.31e-05	0.483458	0.00243527	0.31119	0.0608238	0.523014	0.00089609	-0.425781	0.00860394	0.430132	0.00787962	0.163673	0.333064	-0.0501139	0.768335	-0.177033	0.294547	-0.125494	0.459248	0.0979052	0.56429	0.265489	0.112258	-0.00972698	0.954436	0.349976	0.0337184	0.221322	0.188026	0.210955	0.210094	0.208173	0.216308
blue	ENSMUSG00000037738	330721	Nek5	NIMA (never in mitosis gene a)-related expressed kinase 5	0.249558	0.136334	0.246029	0.142147	0.262238	0.11689	0.409659	0.0118046	-0.327047	0.04818	0.282373	0.0903968	0.267232	0.109831	-0.250625	0.13461	-0.264088	0.114236	0.0412775	0.808341	-0.0037255	0.982541	0.135403	0.424263	-0.0373352	0.826352	0.262145	0.117023	0.260076	0.120048	-0.0671687	0.692847	-0.148861	0.379227
blue	ENSMUSG00000104213	NA	NA	NA	0.431562	0.00765326	0.440261	0.00639279	0.201591	0.231511	0.667598	6.37e-06	-0.643359	1.75e-05	0.12152	0.473701	0.382435	0.0194912	-0.439975	0.00643129	-0.611695	5.76e-05	0.0980889	0.563555	0.0283279	0.867818	0.0402649	0.812958	-0.0444017	0.794136	0.117438	0.488792	0.52146	0.000934139	-0.242858	0.147525	0.0533693	0.753738
blue	ENSMUSG00000037406	330723	Htra4	HtrA serine peptidase 4	0.251331	0.13348	0.0132179	0.938111	0.120444	0.477657	0.456756	0.00448651	-0.115913	0.494492	0.324618	0.0499663	0.497035	0.00175111	-0.588137	0.000129132	-0.400421	0.0140572	0.0908471	0.592828	-0.210908	0.210198	0.284444	0.087958	-0.376849	0.0214993	-0.353356	0.0319243	0.354376	0.0313985	-0.0807921	0.634537	0.000510655	0.997607
blue	ENSMUSG00000041878	NA	NA	NA	0.369358	0.0244601	0.25841	0.122526	0.0600422	0.724084	0.364754	0.0264418	-0.24311	0.147093	0.345489	0.0362268	0.350463	0.0334549	-0.324025	0.0504103	-0.173457	0.304566	-0.122894	0.468677	-0.237748	0.156502	-0.0212406	0.900697	-0.147117	0.3849	-0.297608	0.0736265	0.0703119	0.679223	-0.0259165	0.878983	-0.00872857	0.959108
blue	ENSMUSG00000079243	22437	Xirp1	xin actin-binding repeat containing 1	-0.63687	2.26e-05	-0.511175	0.00122405	-0.439181	0.0065389	-0.79382	4.58e-09	0.609251	6.28e-05	-0.285559	0.0866664	-0.41368	0.0109245	0.481488	0.00255185	0.490374	0.00206213	0.386542	0.0181166	0.105366	0.534832	-0.086448	0.610929	-0.0257384	0.879809	-0.299322	0.0719034	-0.0335317	0.843812	0.101899	0.548429	0.095563	0.57369
blue	ENSMUSG00000074635	67304	3110070M22Rik	RIKEN cDNA 3110070M22 gene	-0.324095	0.0503583	-0.172973	0.305938	-0.195253	0.246824	-0.249117	0.137051	0.130055	0.442959	-0.311298	0.0607297	-0.120421	0.477742	0.111863	0.509798	-0.00989477	0.953651	-0.0374833	0.825674	0.131326	0.438473	-0.0297129	0.861416	0.390049	0.0170081	0.160351	0.343101	-0.195896	0.245238	-0.161368	0.34001	0.435518	0.00705593
blue	ENSMUSG00000092212	109280	Slc22a13b	solute carrier family 22 (organic cation transporter), member 13b	-0.352298	0.0324771	-0.220778	0.189143	-0.164532	0.330498	-0.335457	0.0423863	0.287766	0.0841537	-0.273899	0.100918	-0.377443	0.0212778	0.453611	0.00480626	0.375207	0.0221213	0.186161	0.269947	0.175556	0.298659	-0.0243198	0.886389	0.0268321	0.874741	0.0657831	0.698883	0.0861582	0.612129	0.281447	0.0915036	-0.0400055	0.814142
blue	ENSMUSG00000028555	230603	Ttc39a	tetratricopeptide repeat domain 39A	-0.24664	0.141128	0.0546091	0.748201	-0.0437763	0.796974	-0.416555	0.0103298	-0.0390268	0.818613	0.0651085	0.701828	0.0192675	0.909882	0.143625	0.396405	0.220084	0.190572	0.116426	0.49257	-0.0845804	0.618683	-0.210847	0.210332	0.229851	0.171141	0.212098	0.207578	-0.0956437	0.573365	-0.0503166	0.767424	0.0144611	0.932302
blue	ENSMUSG00000025324	11982	Atp10a	ATPase, class V, type 10A	-0.502441	0.00152983	-0.162921	0.335321	-0.139976	0.408635	-0.494506	0.00186396	0.271755	0.103722	-0.359787	0.0287268	-0.467797	0.00350526	0.495759	0.0018073	0.331199	0.0452445	0.267448	0.109534	0.3057	0.0657679	-0.146863	0.385728	0.308771	0.0629643	0.318685	0.0545541	0.054689	0.747844	-0.0926149	0.585621	0.205399	0.22263
blue	ENSMUSG00000028475	71406	Spaar	small regulatory polypeptide of amino acid response	-0.0189181	0.91151	0.140227	0.407787	0.00173427	0.991872	-0.237575	0.156811	0.184354	0.274705	0.113604	0.503188	0.0522161	0.7589	0.101025	0.551879	0.197416	0.241524	-0.159249	0.346472	-0.20721	0.218489	-0.244161	0.145297	0.390426	0.0168926	0.0156989	0.926523	-0.218981	0.192861	0.15664	0.354532	0.131688	0.437202
blue	ENSMUSG00000027505	76426	Fam209	family with sequence similarity 209	0.130579	0.441107	0.21621	0.198693	0.149947	0.375719	0.262515	0.116489	-0.1679	0.320556	0.100023	0.555852	-0.0235252	0.890078	0.147783	0.382728	-0.123446	0.466668	-0.165215	0.328465	0.208167	0.216322	0.100591	0.553599	0.122547	0.469942	0.389138	0.0172905	0.138836	0.412499	0.187857	0.265528	0.140728	0.406097
blue	ENSMUSG00000108961	102635120	Gm32540	predicted gene, 32540	-0.612269	5.64e-05	-0.379797	0.020419	-0.37384	0.0226507	-0.626209	3.39e-05	0.478826	0.00271704	-0.267563	0.109376	-0.18418	0.275168	0.264148	0.114152	0.412678	0.0111385	0.143261	0.397613	-0.0763286	0.653425	-0.265553	0.112168	0.270446	0.105463	-0.00991418	0.95356	-0.232176	0.166733	0.0609244	0.720192	0.118239	0.485812
blue	ENSMUSG00000087382	74161	Ctcflos	CCCTC-binding factor (zinc finger protein)-like, opposite strand	-0.0352399	0.835961	0.0906202	0.593756	-0.0014477	0.993215	-0.311154	0.0608545	0.07439	0.661696	0.390373	0.0169087	0.176159	0.296976	0.0708653	0.676834	0.279237	0.0941865	0.00252632	0.98816	-0.16619	0.325581	0.0546701	0.747929	0.157609	0.351524	0.0558592	0.74263	-0.118339	0.485441	0.218253	0.194381	0.319128	0.0542007
blue	ENSMUSG00000104231	NA	NA	NA	-0.0932317	0.583115	0.104032	0.540044	0.0234806	0.890285	-0.146728	0.386172	0.0351247	0.83649	0.0904271	0.594546	0.244039	0.145504	-0.160357	0.343084	0.133074	0.432351	0.173821	0.303534	-0.185097	0.272743	0.176273	0.296658	-0.0330059	0.846232	-0.171474	0.310211	0.222569	0.185488	0.102203	0.54723	0.161859	0.338522
blue	ENSMUSG00000032649	269132	Colgalt2	collagen beta(1-O)galactosyltransferase 2	0.429112	0.00804455	0.130512	0.441342	0.298278	0.0729488	0.353009	0.032105	-0.0638951	0.707137	0.364659	0.0264841	0.304813	0.0665957	-0.457111	0.00445164	-0.361254	0.0280358	-0.173338	0.304901	-0.0571691	0.736806	0.31748	0.0555255	-0.106539	0.530266	-0.0859986	0.612791	0.0049007	0.977035	-0.168538	0.318692	0.0947045	0.577152
blue	ENSMUSG00000026826	18227	Nr4a2	nuclear receptor subfamily 4, group A, member 2	0.373226	0.0228915	0.344449	0.0368292	0.379762	0.0204317	0.31338	0.0589352	-0.293731	0.0776436	0.0107437	0.949679	-0.0973951	0.566331	0.0490446	0.773147	-0.0910026	0.592192	0.17004	0.314335	0.214533	0.202283	0.23263	0.165882	-0.0929938	0.584081	0.34307	0.0376406	0.465714	0.00367464	0.031502	0.85316	-0.212789	0.206064
blue	ENSMUSG00000117664	NA	NA	NA	0.326875	0.0483048	0.268196	0.108507	0.266886	0.11031	0.41247	0.0111832	-0.307608	0.0640147	-0.0399358	0.81446	0.0370844	0.827501	-0.268112	0.108623	-0.4603	0.00414848	-0.311195	0.0608194	0.295026	0.0762825	0.259861	0.120366	-0.0844187	0.619356	0.16265	0.336135	-0.116183	0.493482	-0.32469	0.0499125	-0.047355	0.780767
blue	ENSMUSG00000014776	78688	Nol3	nucleolar protein 3 (apoptosis repressor with CARD domain)	-0.0133513	0.937487	0.205787	0.221739	-0.11666	0.491696	-0.162044	0.337964	-0.0530692	0.75508	-0.0278407	0.870072	-0.0361929	0.831587	0.157875	0.350703	0.101792	0.548848	0.0840406	0.620932	0.0541631	0.750191	0.0141682	0.93367	-0.0188171	0.91198	0.0757962	0.655692	0.199324	0.236912	0.115717	0.49523	-0.129723	0.444131
blue	ENSMUSG00000019853	56016	Hebp2	heme binding protein 2	-0.492105	0.00197697	-0.127206	0.453098	-0.469257	0.00339067	-0.5626	0.00028959	0.234753	0.161942	-0.150725	0.373219	-0.241759	0.149422	0.274681	0.0999096	0.555455	0.000358822	0.134468	0.427499	-0.0078642	0.963155	0.0381306	0.82271	0.0939435	0.58023	-0.109513	0.518781	-0.179289	0.288339	0.0197434	0.907666	0.00927278	0.956561
blue	ENSMUSG00000073406	14963	H2-Bl	histocompatibility 2, blastocyst	0.293504	0.0778839	0.179728	0.28714	0.130268	0.442206	0.459898	0.00418567	-0.494017	0.0018865	0.256684	0.125133	0.488465	0.00215972	-0.404483	0.0130258	-0.578511	0.000176465	-0.255591	0.126804	0.036778	0.828905	0.198084	0.239901	0.0931948	0.583265	0.0118297	0.9446	0.119397	0.481521	-0.0429144	0.80089	0.151618	0.370363
blue	ENSMUSG00000106069	NA	NA	NA	0.595405	0.000101338	0.379121	0.0206625	0.328582	0.0470772	0.735374	2.17e-07	-0.549206	0.000431119	0.319473	0.0539264	0.218517	0.19383	-0.255217	0.127381	-0.398786	0.0144916	-0.162426	0.33681	0.0453765	0.789717	-0.0325352	0.848399	-0.0905141	0.59419	0.183249	0.277643	0.230294	0.170294	-0.0607623	0.720907	-0.228686	0.173381
blue	ENSMUSG00000021118	27260	Plek2	pleckstrin 2	-0.130575	0.44112	0.104547	0.538027	-0.26318	0.115533	-0.29285	0.0785796	0.254335	0.128746	-0.0172876	0.91911	-0.298361	0.0728656	0.313631	0.0587219	0.27419	0.100542	0.147264	0.38442	0.182967	0.278396	0.0763721	0.65324	-0.0390453	0.818528	0.104121	0.539695	0.0914199	0.590489	0.00720339	0.966249	-0.103184	0.543368
blue	ENSMUSG00000086282	NA	NA	NA	-0.0474167	0.780489	0.0714401	0.674357	-0.061679	0.716868	-0.189334	0.261721	0.0905363	0.594099	0.159377	0.346079	0.131215	0.438867	-0.0523821	0.758156	0.203016	0.228161	0.165866	0.326537	-0.145793	0.389239	0.052546	0.757422	-0.171342	0.31059	-0.283056	0.0895873	-0.00497669	0.976679	0.116605	0.491903	0.0876691	0.605881
blue	ENSMUSG00000008734	64297	Gprc5b	G protein-coupled receptor, family C, group 5, member B	0.272616	0.102588	0.357761	0.0297042	0.195831	0.245398	0.389427	0.0172004	-0.359292	0.0289631	0.255335	0.127198	0.152386	0.367913	0.0348161	0.837907	-0.160156	0.343697	-0.468991	0.00341128	0.061725	0.716666	0.0385155	0.82095	0.436038	0.0069804	0.608798	6.38e-05	-0.304329	0.0670503	0.206213	0.220761	0.180711	0.284469
blue	ENSMUSG00000069910	70385	Spdl1	spindle apparatus coiled-coil protein 1	0.247415	0.139843	0.225705	0.179208	0.202519	0.229325	0.215661	0.199866	0.0165743	0.922437	0.405604	0.0127527	0.102777	0.544968	-0.10715	0.527898	0.00262515	0.987697	0.0696047	0.68228	0.0378128	0.824165	0.210638	0.210794	-0.156507	0.354945	0.194609	0.248414	0.225451	0.17971	0.0744349	0.661504	-0.0248367	0.88399
blue	ENSMUSG00000025003	13098	Cyp2c39	cytochrome P450, family 2, subfamily c, polypeptide 39	0.705508	1.08e-06	0.556313	0.000349792	0.481623	0.00254371	0.772131	2.19e-08	-0.670459	5.62e-06	0.563491	0.00028185	0.522077	0.00091887	-0.484273	0.00238841	-0.452078	0.0049692	-0.182727	0.279038	-0.171241	0.31088	0.136465	0.420606	-0.128753	0.447575	0.0201608	0.905722	0.308911	0.062839	0.00415322	0.980537	-0.0824302	0.627662
blue	ENSMUSG00000031441	50770	Atp11a	ATPase, class VI, type 11A	-0.493153	0.00192693	-0.373125	0.0229315	-0.196835	0.242939	-0.870425	2.58e-12	0.666832	6.59e-06	-0.209182	0.214039	-0.350524	0.0334221	0.384325	0.0188482	0.687158	2.64e-06	0.436648	0.00689276	-0.0796288	0.639439	-0.0827896	0.626157	-0.0707393	0.677378	-0.170063	0.314271	-0.130845	0.440168	0.123989	0.464695	0.10894	0.520987
blue	ENSMUSG00000085289	NA	NA	NA	-0.228223	0.174277	-0.0931321	0.58352	-0.170014	0.314412	-0.329116	0.0466984	0.315495	0.0571566	0.00912022	0.957275	0.15486	0.360097	-0.114085	0.501372	0.181814	0.281489	0.150686	0.373346	-0.27282	0.102322	-0.0180687	0.915468	-0.0123865	0.941996	-0.323478	0.0508227	-0.0787043	0.643345	0.0551823	0.745645	0.370161	0.0241275
blue	ENSMUSG00000091705	15013	H2-Q2	histocompatibility 2, Q region locus 2	-0.186088	0.270137	0.151481	0.370798	-0.0146056	0.931627	-0.115261	0.496939	-0.090396	0.594673	-0.234419	0.162558	-0.0677606	0.690274	0.106562	0.530176	-0.0586241	0.730355	0.164332	0.331095	0.202166	0.230156	0.000754276	0.996465	0.257485	0.123918	0.292782	0.0786518	0.318478	0.0547202	-0.0585459	0.730701	0.151157	0.371835
blue	ENSMUSG00000018983	242705	E2f2	E2F transcription factor 2	-0.492583	0.00195402	-0.224312	0.18198	-0.21937	0.192052	-0.507365	0.00135006	0.557482	0.000337818	-0.318485	0.0547148	-0.509939	0.00126375	0.527626	0.000791145	0.606866	6.83e-05	0.350528	0.0334199	-0.0101199	0.952597	-0.24318	0.146971	-0.094353	0.578573	-0.0902968	0.595079	-0.00551534	0.974155	0.223543	0.18352	-0.170139	0.314051
blue	ENSMUSG00000048458	109050	Inka2	inka box actin regulator 2	-0.369426	0.0244319	-0.142672	0.399578	-0.0739473	0.66359	-0.273813	0.101029	0.200392	0.234358	-0.345693	0.0361094	-0.0780987	0.645908	0.210607	0.210863	0.20833	0.215954	0.145961	0.388687	-0.148199	0.381375	-0.267568	0.109368	0.313791	0.0585859	0.248566	0.137949	0.0379466	0.823553	0.224039	0.182526	-0.0213794	0.900051
blue	ENSMUSG00000011034	20537	Slc5a1	solute carrier family 5 (sodium/glucose cotransporter), member 1	0.436371	0.00693243	0.341	0.0388859	0.419125	0.00982188	0.412498	0.0111772	-0.321968	0.0519754	0.0221342	0.896541	0.0642291	0.705675	-0.171156	0.311124	-0.340574	0.0391462	-0.122764	0.469151	0.259287	0.121216	0.180769	0.284311	0.203105	0.227953	0.49486	0.00184781	0.214488	0.202382	-0.195605	0.245954	0.164607	0.330275
blue	ENSMUSG00000002007	56504	Srpk3	serine/arginine-rich protein specific kinase 3	0.0050666	0.976257	0.0400454	0.81396	-0.076439	0.652955	0.0671335	0.693	-0.0957278	0.573026	0.119549	0.48096	-0.020959	0.902007	0.153426	0.364614	0.0454825	0.789237	0.0878251	0.605237	0.0345338	0.839204	-0.00551276	0.974167	-0.106926	0.528766	0.148073	0.381782	0.251171	0.133736	0.0893388	0.599008	-0.0745688	0.660931
blue	ENSMUSG00000001665	103140	Gstt3	glutathione S-transferase, theta 3	0.774716	1.83e-08	0.565427	0.000265676	0.436208	0.00695601	0.848956	3.16e-11	-0.718827	5.41e-07	0.535709	0.000633237	0.447011	0.005542	-0.381605	0.0197792	-0.479617	0.00266699	-0.35198	0.0326449	-0.052065	0.759577	0.163774	0.332761	-0.00378895	0.982244	0.169916	0.314693	0.136762	0.419586	0.0753941	0.657407	-0.127047	0.453668
blue	ENSMUSG00000097075	381922	Cdiptos	CDIP transferase, opposite strand	0.161846	0.338561	0.128925	0.446966	0.151026	0.372255	0.24807	0.138763	-0.018659	0.912717	-0.00420873	0.980277	0.0775857	0.648083	-0.0534501	0.753377	-0.246346	0.141618	0.0153833	0.927996	0.0179765	0.915898	-0.221051	0.188583	0.0112263	0.947421	0.162029	0.338009	0.0330105	0.84621	0.0698736	0.681117	0.192753	0.253044
blue	ENSMUSG00000108314	NA	NA	NA	0.457132	0.00444956	0.287487	0.0844682	0.26745	0.109532	0.394429	0.0157043	-0.326336	0.0486971	0.156575	0.354733	0.253978	0.129303	-0.261188	0.118415	-0.42181	0.00931392	-0.184606	0.274038	0.0781633	0.645635	0.155652	0.357614	0.0806207	0.635259	0.168827	0.317851	0.0443379	0.794426	-0.0805563	0.63553	0.519293	0.000989598
blue	ENSMUSG00000093989	52898	Rnasek	ribonuclease, RNase K	-0.27375	0.101111	-0.288854	0.0829358	-0.372744	0.0230823	-0.286807	0.0852389	0.281781	0.0911027	-0.233553	0.16416	-0.271548	0.103996	0.340737	0.0390463	0.194946	0.247582	0.120097	0.478933	0.11774	0.487667	-0.0563686	0.740364	0.0148148	0.93065	-0.320419	0.0531798	-0.176348	0.296449	0.197213	0.242018	0.0339171	0.842039
blue	ENSMUSG00000101122	NA	NA	NA	0.32326	0.0509884	0.038669	0.820248	0.194234	0.249345	0.394582	0.0156601	-0.157888	0.350662	0.151717	0.370046	0.301701	0.0695642	-0.29257	0.0788785	-0.131399	0.438218	-0.0841956	0.620286	-0.185937	0.270533	0.359104	0.0290533	-0.189181	0.262114	0.0387297	0.81997	0.149241	0.377998	0.24474	0.144316	-0.0112155	0.947472
blue	ENSMUSG00000028970	18669	Abcb1b	ATP-binding cassette, sub-family B (MDR/TAP), member 1B	-0.566976	0.000253343	-0.382091	0.0196102	-0.368903	0.0246504	-0.645477	1.61e-05	0.53029	0.000735618	-0.19018	0.259554	-0.383699	0.0190591	0.488363	0.00216508	0.440047	0.00642154	0.14136	0.40397	0.0534979	0.753163	-0.220862	0.188971	0.398528	0.0145611	0.174097	0.302756	-0.267573	0.109362	0.0230186	0.892431	0.207003	0.218959
blue	ENSMUSG00000052572	23859	Dlg2	discs large MAGUK scaffold protein 2	0.405512	0.0127747	0.334982	0.0426977	0.407006	0.0124179	0.612378	5.62e-05	-0.549427	0.000428361	0.201536	0.231641	0.347651	0.0349997	-0.335747	0.042197	-0.612824	5.53e-05	-0.503927	0.00147349	0.0317928	0.851819	-0.120377	0.477901	0.349013	0.0342442	0.480386	0.00261911	-0.0633412	0.709565	-0.194571	0.248511	-0.037517	0.82552
blue	ENSMUSG00000021567	72293	Nkd2	naked cuticle 2	-0.0689059	0.685305	0.161593	0.339327	0.0587591	0.729757	0.223161	0.18429	-0.102538	0.545908	-0.240036	0.152434	-0.290706	0.0808937	0.22507	0.180468	-0.209489	0.213353	-0.0948991	0.576367	0.419047	0.0098368	-0.102182	0.547313	0.27843	0.0951816	0.444025	0.00590548	0.0484397	0.775873	-0.105347	0.534903	-0.0143541	0.932802
blue	ENSMUSG00000020974	18974	Pole2	polymerase (DNA directed), epsilon 2 (p59 subunit)	-0.26539	0.112396	-0.150813	0.372936	-0.294038	0.077319	-0.38964	0.0171344	0.180776	0.284292	-0.206573	0.219939	-0.400715	0.0139804	0.378989	0.0207106	0.332524	0.0443388	0.0233084	0.891085	0.22906	0.17266	-0.114938	0.498157	0.215941	0.199268	0.180944	0.283836	-0.0490612	0.773072	-0.0684501	0.687281	-0.0824007	0.627785
blue	ENSMUSG00000039787	99151	Cercam	cerebral endothelial cell adhesion molecule	0.273868	0.100957	0.260219	0.119837	0.0784005	0.64463	0.370836	0.0238506	-0.283755	0.0887635	0.274019	0.100763	0.1823	0.280184	0.0364972	0.830192	-0.20879	0.214918	-0.194575	0.248498	0.0284544	0.867233	-0.0383512	0.821701	0.331651	0.044934	0.511491	0.00121408	0.0671665	0.692856	0.237606	0.156756	-0.0372184	0.826887
blue	ENSMUSG00000104362	NA	NA	NA	-0.17877	0.289758	-0.064937	0.702578	-0.0886633	0.601784	-0.185433	0.271859	-0.0331943	0.845364	-0.0769716	0.650691	0.237187	0.15751	-0.227556	0.175575	0.0122611	0.942583	-0.00356554	0.98329	-0.26941	0.106857	-0.125544	0.459069	0.104669	0.537552	-0.108603	0.522282	-0.0376117	0.825086	-0.0595862	0.726098	0.0842236	0.620169
blue	ENSMUSG00000029452	77462	Tmem116	transmembrane protein 116	-0.181114	0.283376	-0.0240077	0.887837	0.0469199	0.782734	-0.296569	0.0746862	0.208979	0.214495	-0.0156739	0.926639	-0.168724	0.318153	0.276227	0.0979386	0.252617	0.131437	0.285741	0.0864579	0.10847	0.522797	0.227645	0.1754	-0.179242	0.288466	-0.0987935	0.560743	0.265416	0.11236	0.205213	0.223058	0.101719	0.549139
blue	ENSMUSG00000019737	233066	Syne4	spectrin repeat containing, nuclear envelope family member 4	-0.4172	0.0102003	-0.339724	0.03967	-0.0900208	0.59621	-0.540068	0.000560272	0.408058	0.0121716	-0.597071	9.58e-05	-0.5209	0.000948203	0.468692	0.00343461	0.195688	0.245751	0.0121555	0.943076	0.357992	0.0295917	-0.141772	0.40259	0.165971	0.326227	0.0951851	0.575213	-0.285678	0.0865303	0.0351962	0.836162	0.148237	0.381252
blue	ENSMUSG00000060317	209186	Acnat2	acyl-coenzyme A amino acid N-acyltransferase 2	-0.201195	0.232448	-0.119975	0.479385	0.032801	0.847175	-0.511775	0.00120518	0.470668	0.00328302	-0.0326117	0.848047	-0.468936	0.00341556	0.436283	0.00694516	0.552931	0.00038661	0.306378	0.0651402	0.100629	0.553449	-0.173007	0.305841	-0.0555307	0.744093	0.0990918	0.559555	-0.130906	0.439952	0.00416936	0.980461	-0.0340608	0.841379
blue	ENSMUSG00000013584	19378	Aldh1a2	aldehyde dehydrogenase family 1, subfamily A2	0.151494	0.370756	-0.150331	0.374483	0.140388	0.407246	0.480418	0.00261718	-0.153647	0.363915	0.0413588	0.807971	0.204241	0.225305	-0.156837	0.353919	-0.41669	0.0103026	-0.209935	0.212358	0.0191048	0.91064	-0.110906	0.513445	0.410173	0.0116888	0.432126	0.00756557	-0.0118916	0.94431	0.0943856	0.578441	0.198479	0.238946
blue	ENSMUSG00000038155	14869	Gstp2	glutathione S-transferase, pi 2	-0.595503	0.000101004	-0.464586	0.00376931	-0.380174	0.0202842	-0.737806	1.89e-07	0.718378	5.54e-07	-0.22252	0.185587	-0.535779	0.000631988	0.581964	0.000157944	0.606663	6.88e-05	0.287562	0.0843833	0.113217	0.504653	-0.12477	0.461866	-0.0963123	0.570675	-0.0554622	0.744398	-0.168685	0.318265	0.0922699	0.587024	-0.183022	0.278251
blue	ENSMUSG00000027834	20713	Serpini1	serine (or cysteine) peptidase inhibitor, clade I, member 1	-0.182226	0.280382	-0.13137	0.438321	-0.190798	0.257982	-0.143111	0.398113	-0.214958	0.201369	-0.0567925	0.738479	-0.0864807	0.610793	0.30424	0.0671349	0.0862822	0.611615	0.00179546	0.991585	0.0460843	0.786512	-0.260017	0.120136	0.127798	0.45098	0.149022	0.378708	0.0108379	0.949238	0.0858542	0.61339	-0.225605	0.179407
blue	ENSMUSG00000116226	NA	NA	NA	-0.264243	0.114016	-0.190817	0.257933	-0.233232	0.164757	-0.360254	0.0285052	0.244074	0.145445	0.100581	0.55364	-0.0997257	0.557033	0.360397	0.0284377	0.377789	0.0211497	0.233207	0.164804	0.0221002	0.8967	0.0479606	0.778034	0.175658	0.298375	0.116594	0.491945	0.108013	0.524559	0.297141	0.0741018	0.400736	0.0139748
blue	ENSMUSG00000111666	NA	NA	NA	0.264213	0.114059	0.137725	0.416286	0.150972	0.372427	0.216989	0.197043	0.0936952	0.581236	0.115155	0.49734	0.0180896	0.915371	-0.0463191	0.78545	-0.148063	0.381818	-0.04744	0.780384	0.0924671	0.586222	0.0964804	0.57	-0.130327	0.441995	0.190144	0.259649	0.165175	0.328585	0.0546178	0.748162	0.150028	0.37546
blue	ENSMUSG00000106288	NA	NA	NA	-0.212349	0.207027	-0.0890385	0.600241	-0.183093	0.27806	-0.257823	0.123408	0.0837909	0.621974	0.0449691	0.791563	0.159	0.347237	-0.106315	0.531137	0.202454	0.229478	0.167533	0.321629	-0.264391	0.113806	0.0149107	0.930203	-0.0841245	0.620582	-0.416288	0.0103839	0.0999284	0.556227	-0.00342025	0.983971	0.0474456	0.780358
blue	ENSMUSG00000087710	NA	NA	NA	0.078866	0.642661	0.110763	0.513992	0.0889115	0.600763	0.359506	0.0288608	-0.376209	0.0217399	-0.032318	0.849399	0.490699	0.00204587	-0.36145	0.0279443	-0.405115	0.0128712	-0.17332	0.304952	-0.326379	0.0486655	-0.437014	0.00684073	0.323213	0.0510238	0.114013	0.501644	0.0345349	0.839199	-0.0214786	0.89959	0.280784	0.0923022
blue	ENSMUSG00000047414	399558	Flrt2	fibronectin leucine rich transmembrane protein 2	0.171936	0.308891	0.0667371	0.694725	-0.0567621	0.738614	0.369009	0.0246059	-0.164115	0.331741	-0.00542797	0.974565	0.0878881	0.604977	-0.123283	0.467261	-0.386143	0.0182467	-0.459267	0.00424467	0.141889	0.402197	-0.0742199	0.662423	0.443075	0.00602543	0.468358	0.00346086	-0.228929	0.172912	-0.110705	0.514213	0.358851	0.0291749
blue	ENSMUSG00000070605	433791	Zfp992	zinc finger protein 992	0.228878	0.17301	0.121822	0.472595	0.198891	0.237953	0.403175	0.0133507	0.0374325	0.825906	0.218496	0.193872	-0.0353026	0.835673	-0.193252	0.251793	-0.164146	0.33165	0.117251	0.489489	0.119435	0.481379	0.151207	0.371676	-0.345317	0.0363254	-0.0509287	0.764674	0.178873	0.289477	-0.15256	0.367362	-0.0194222	0.909161
blue	ENSMUSG00000001672	73608	Marveld3	MARVEL (membrane-associating) domain containing 3	-0.739954	1.66e-07	-0.441802	0.00618935	-0.445101	0.00577224	-0.865117	4.98e-12	0.67735	4.14e-06	-0.413454	0.0109724	-0.618189	4.56e-05	0.647412	1.49e-05	0.651574	1.25e-05	0.386841	0.0180199	0.186179	0.269899	-0.204835	0.223929	0.0148076	0.930684	-0.0663102	0.696585	-0.137126	0.418338	0.0162276	0.924055	-0.120536	0.477319
blue	ENSMUSG00000117775	NA	NA	NA	0.0223926	0.89534	0.106713	0.52959	0.214591	0.20216	-0.254957	0.127782	0.0626991	0.712383	0.0149936	0.929815	-0.0173293	0.918916	0.00125224	0.994131	0.323853	0.05054	0.18851	0.263841	-0.101667	0.549344	0.0126871	0.940591	0.115489	0.496083	0.26119	0.118413	0.0690839	0.684534	0.0395647	0.816155	-0.0195889	0.908385
blue	ENSMUSG00000026072	16177	Il1r1	interleukin 1 receptor, type I	-0.668522	6.12e-06	-0.519114	0.000994296	-0.369141	0.0245506	-0.882325	5.27e-13	0.716462	6.14e-07	-0.457591	0.00440478	-0.583711	0.000149256	0.570192	0.000229352	0.602473	7.96e-05	0.366955	0.0254784	0.201707	0.231238	-0.0314606	0.853351	0.0380277	0.823181	-0.104028	0.540057	-0.151103	0.37201	0.0453475	0.789848	0.138461	0.413775
blue	ENSMUSG00000010651	235674	Acaa1b	acetyl-Coenzyme A acyltransferase 1B	0.650724	1.3e-05	0.48961	0.00210074	0.252663	0.131365	0.776159	1.66e-08	-0.54146	0.00053861	0.763047	4e-08	0.593727	0.000107228	-0.325855	0.0490498	-0.256008	0.126165	-0.337858	0.0408404	-0.340872	0.0389641	0.0625584	0.713002	0.0112181	0.94746	0.100896	0.552392	0.0819983	0.629472	0.432573	0.00749669	-0.109444	0.519046
blue	ENSMUSG00000047746	207215	Fbxo40	F-box protein 40	0.625979	3.42e-05	0.543919	0.000502159	0.219188	0.192431	0.560104	0.000312275	-0.507796	0.00133526	0.618543	4.5e-05	0.613289	5.44e-05	-0.583108	0.000152204	-0.292798	0.0786352	-0.25044	0.134909	-0.451054	0.00508064	0.00908722	0.95743	0.0474002	0.780563	-0.166606	0.324353	-0.0275278	0.87152	-0.0439233	0.796307	-0.0736061	0.665051
blue	ENSMUSG00000104348	NA	NA	NA	0.784274	9.31e-09	0.611293	5.84e-05	0.32833	0.0472566	0.720482	4.95e-07	-0.657212	9.93e-06	0.788775	6.7e-09	0.702162	1.28e-06	-0.479285	0.00268795	-0.385387	0.0184946	-0.425607	0.00863403	-0.317765	0.0552951	0.091509	0.590125	0.140483	0.406922	0.156128	0.356128	-0.000237711	0.998886	0.200697	0.233632	0.0285664	0.866715
blue	ENSMUSG00000001228	18140	Uhrf1	ubiquitin-like, containing PHD and RING finger domains, 1	-0.252521	0.131589	0.0190203	0.911033	-0.0253555	0.881584	-0.356796	0.0301795	0.171616	0.309806	0.0365898	0.829768	-0.0547495	0.747574	0.0851228	0.616427	0.342799	0.0378019	0.267832	0.109006	-0.126881	0.454261	-0.190315	0.259212	-0.110791	0.513887	-0.011919	0.944182	0.0615471	0.717449	0.0142331	0.933367	0.0133152	0.937655
blue	ENSMUSG00000054206	16904	Gzmm	granzyme M (lymphocyte met-ase 1)	0.295256	0.0760428	0.266688	0.110585	0.00204741	0.990405	0.33931	0.0399275	-0.280167	0.0930507	0.100156	0.555325	-0.114483	0.49987	0.214825	0.201656	-0.181547	0.282207	-0.19536	0.246558	0.331648	0.0449362	0.107556	0.526324	0.188119	0.264851	0.478784	0.00271977	0.129574	0.44466	0.106093	0.531998	0.167502	0.32172
blue	ENSMUSG00000026442	269116	Nfasc	neurofascin	-0.605618	7.14e-05	-0.460386	0.0041405	-0.479152	0.00269631	-0.846524	4.09e-11	0.587991	0.000129755	-0.305698	0.0657698	-0.362901	0.027276	0.435458	0.00706464	0.643327	1.75e-05	0.331415	0.0450961	-0.0766721	0.651964	-0.259881	0.120336	-0.0287829	0.865714	-0.266869	0.110334	-0.219487	0.191809	0.0998804	0.556418	0.0587755	0.729684
blue	ENSMUSG00000030200	66813	Bcl2l14	BCL2-like 14 (apoptosis facilitator)	-0.119826	0.479933	-0.0128991	0.939601	-0.0645846	0.704119	-0.491295	0.0020164	0.11688	0.490875	0.272698	0.102482	0.178963	0.28923	0.0338034	0.842562	0.432208	0.00755292	0.211967	0.207864	-0.363463	0.0270209	0.0114342	0.946449	-0.00263448	0.987653	-0.128606	0.4481	-0.0571591	0.736851	0.195598	0.245972	-0.0401831	0.813332
blue	ENSMUSG00000059873	258154	Olfr1029	olfactory receptor 1029	-0.413964	0.0108643	-0.227979	0.174751	-0.0649819	0.702382	-0.322994	0.0511903	0.350798	0.0332748	-0.344184	0.0369841	-0.471308	0.00323516	0.41812	0.0100178	0.280409	0.0927558	0.0797653	0.638863	0.259306	0.121189	-0.0881291	0.603984	0.169442	0.316068	0.229484	0.171844	-0.177565	0.293076	-0.028391	0.867526	0.121046	0.475442
blue	ENSMUSG00000003477	21743	Inmt	indolethylamine N-methyltransferase	0.633044	2.61e-05	0.395593	0.015372	0.353731	0.0317301	0.948375	4.93e-19	-0.681488	3.43e-06	0.310343	0.0615661	0.567586	0.000248627	-0.521733	0.000927353	-0.733783	2.38e-07	-0.42086	0.00949102	-0.086283	0.611612	0.0473228	0.780913	0.071564	0.673824	0.141758	0.402635	0.153359	0.364827	0.0556645	0.743497	0.058304	0.731772
blue	ENSMUSG00000105345	NA	NA	NA	-0.47951	0.00267372	-0.10279	0.544919	-0.309109	0.0626613	-0.357799	0.0296856	0.150149	0.375071	-0.17332	0.304953	-0.108742	0.521749	0.325605	0.0492339	0.27771	0.0960757	0.201463	0.231814	-0.0847392	0.618022	-0.307781	0.0638576	0.410111	0.0117028	0.049364	0.771709	0.0587439	0.729824	0.159121	0.346865	-0.00378562	0.982259
blue	ENSMUSG00000042607	65255	Asb4	ankyrin repeat and SOCS box-containing 4	-0.29958	0.0716471	0.0367727	0.828929	-0.294486	0.0768479	-0.405859	0.0126912	0.121758	0.472831	-0.396327	0.0151658	-0.370089	0.024157	0.408646	0.0120358	0.0687459	0.685998	-0.0968335	0.568582	0.384482	0.0187954	-0.159411	0.345976	0.506987	0.00136319	0.250651	0.13457	-0.271111	0.104576	-0.111052	0.512887	0.373997	0.0225892
blue	ENSMUSG00000027579	20811	Srms	src-related kinase lacking C-terminal regulatory tyrosine and N-terminal myristylation sites	-0.567822	0.000246819	-0.429209	0.00802872	-0.486543	0.00226207	-0.771092	2.35e-08	0.624415	3.62e-05	-0.182383	0.27996	-0.45263	0.00490994	0.62968	2.97e-05	0.736755	2e-07	0.303244	0.0680791	-0.0434462	0.798474	-0.263464	0.115126	0.0727146	0.668876	-0.0999397	0.556183	-0.207948	0.216815	0.304543	0.0668489	-0.0355774	0.834411
blue	ENSMUSG00000086253	NA	NA	NA	0.327635	0.0477548	0.0239182	0.888253	0.34025	0.0393451	0.409142	0.0119221	-0.125984	0.457482	0.183945	0.275791	0.220733	0.189235	-0.211079	0.20982	-0.35627	0.0304412	-0.398418	0.0145907	-0.0693056	0.683574	-0.00923671	0.95673	-0.140135	0.408098	0.0376435	0.82494	-0.121475	0.473867	0.0996075	0.557503	-0.171344	0.310584
blue	ENSMUSG00000111082	NA	NA	NA	-0.472664	0.00313583	-0.512593	0.00117986	-0.108785	0.521582	-0.548916	0.000434772	0.496669	0.00176705	-0.444707	0.00582068	-0.583039	0.000152542	0.548534	0.000439628	0.304035	0.0673285	0.257695	0.1236	0.374271	0.0224826	-0.124461	0.462984	-0.0692957	0.683617	0.139974	0.408642	-0.0286546	0.866307	-0.0356515	0.834071	-0.0269459	0.874214
blue	ENSMUSG00000030257	259302	Srgap3	SLIT-ROBO Rho GTPase activating protein 3	0.377111	0.0214013	0.387199	0.0179047	0.0872366	0.607667	0.572924	0.000210595	-0.45273	0.00489934	0.377533	0.0212444	0.405976	0.0126631	-0.268297	0.10837	-0.198181	0.239666	0.112393	0.50778	-0.263571	0.114973	0.0575082	0.735301	-0.0547627	0.747516	-0.0263988	0.876748	0.520836	0.000949834	0.238289	0.155532	-0.177044	0.294518
blue	ENSMUSG00000049676	320225	Catsperg1	cation channel sperm associated auxiliary subunit gamma 1	0.135493	0.423954	-0.0365311	0.830037	0.204307	0.225151	0.324283	0.0502171	-0.14614	0.388097	0.0365869	0.829781	0.103991	0.540202	-0.275415	0.09897	-0.316882	0.0560128	0.0228253	0.893329	0.142713	0.39944	0.248395	0.13823	-0.0961147	0.571469	-0.0235864	0.889793	0.0355405	0.834581	-0.213843	0.203773	0.271193	0.104467
blue	ENSMUSG00000080783	NA	NA	NA	0.226198	0.178236	0.18948	0.261346	-0.032687	0.8477	0.110031	0.516795	-0.0684949	0.687087	0.195608	0.245947	0.098915	0.560259	-0.193953	0.250045	0.0800061	0.637848	-0.221326	0.188019	-0.102893	0.544514	0.27813	0.0955534	-0.18884	0.262991	-0.19695	0.242659	-0.150213	0.374864	-0.0443405	0.794414	-0.160331	0.343163
blue	ENSMUSG00000082676	NA	NA	NA	-0.128739	0.447627	-0.0490475	0.773134	0.0380926	0.822885	-0.388685	0.0174323	0.211785	0.208263	0.0110694	0.948156	-0.183692	0.276463	0.245972	0.142243	0.404876	0.0129293	0.21858	0.193698	-0.0348566	0.837721	-0.10427	0.53911	0.0119893	0.943853	0.239963	0.152563	-0.107837	0.525239	-0.0294924	0.862435	0.0255728	0.880576
blue	ENSMUSG00000105837	NA	NA	NA	0.587248	0.000132969	0.359029	0.0290895	0.491198	0.00202117	0.710932	8.19e-07	-0.484151	0.00239536	0.0802665	0.63675	0.128766	0.44753	-0.418555	0.00993264	-0.619012	4.42e-05	-0.319213	0.0541325	0.282116	0.0907021	0.14394	0.395359	-0.0625194	0.713173	0.274883	0.0996504	0.0556042	0.743765	-0.411171	0.0114669	-0.0433149	0.79907
blue	ENSMUSG00000085971	NA	NA	NA	0.635687	2.36e-05	0.341523	0.0385681	0.347063	0.0353298	0.758665	5.31e-08	-0.562729	0.000288455	0.492932	0.0019374	0.470513	0.00329472	-0.375695	0.0219351	-0.414792	0.0106912	-0.424196	0.00888165	-0.181644	0.281947	0.0500604	0.768575	0.105941	0.53259	0.216875	0.197283	-0.0237493	0.889037	0.117429	0.488825	-0.0108512	0.949176
blue	ENSMUSG00000042474	69169	Fcmr	Fc fragment of IgM receptor	0.418046	0.0100324	0.587041	0.000133875	-0.000616133	0.997112	0.428548	0.00813707	-0.424579	0.00881377	0.458559	0.00431171	0.348888	0.0343133	-0.165902	0.326431	-0.115093	0.497572	0.166245	0.325418	-0.143068	0.398258	0.125778	0.458226	-0.131554	0.437672	0.05001	0.768802	0.49408	0.0018836	0.209117	0.214185	-0.110006	0.516892
blue	ENSMUSG00000097501	NA	NA	NA	0.434859	0.00715258	0.239144	0.15401	0.316641	0.0562102	0.505709	0.00140833	-0.386495	0.0181319	0.206519	0.220062	0.46627	0.00362875	-0.519847	0.000975148	-0.401141	0.0138696	-0.0043276	0.97972	-0.286868	0.0851688	-0.0289514	0.864935	-0.267636	0.109274	-0.159981	0.344231	0.465851	0.0036633	-0.071743	0.673053	-0.0751306	0.658531
blue	ENSMUSG00000020893	18626	Per1	period circadian clock 1	0.189822	0.26047	0.167544	0.321597	0.0605276	0.721942	0.412454	0.0111868	-0.508949	0.00129635	-0.0402943	0.812824	0.0247529	0.884379	0.0984853	0.561972	-0.569172	0.000236729	-0.330911	0.0454433	0.40708	0.0124004	-0.136298	0.421181	0.221603	0.187453	0.392743	0.0161959	0.131103	0.439258	-0.0786039	0.64377	-0.0312592	0.854279
blue	ENSMUSG00000106678	NA	NA	NA	0.16464	0.330175	0.0940227	0.57991	0.0714506	0.674312	0.255632	0.126741	-0.0788242	0.642838	-0.0413385	0.808063	-0.132384	0.434761	0.0436212	0.797679	-0.269885	0.106216	-0.241805	0.149342	0.263452	0.115143	-0.01324	0.938007	-0.0482932	0.776534	0.189479	0.261349	-0.0856532	0.614224	-0.175684	0.298301	0.0487894	0.774297
blue	ENSMUSG00000086727	70988	4931428L18Rik	RIKEN cDNA 4931428L18 gene	0.46159	0.00403103	0.321506	0.0523326	0.0514715	0.762238	0.612153	5.67e-05	-0.558762	0.000325123	0.398618	0.0145366	0.459076	0.00426264	-0.467884	0.00349833	-0.609713	6.18e-05	-0.384821	0.0186823	0.0297987	0.86102	0.203556	0.226899	0.0573254	0.736113	0.00445664	0.979115	-0.0156052	0.92696	-0.175289	0.299408	0.0674997	0.691407
blue	ENSMUSG00000017314	50997	Mpp2	membrane protein, palmitoylated 2 (MAGUK p55 subfamily member 2)	0.275106	0.0993651	0.366241	0.0257879	0.146434	0.387133	0.347062	0.0353305	-0.217006	0.197007	0.261533	0.117913	0.13372	0.430099	0.0510678	0.764049	-0.217025	0.196965	-0.279755	0.0935526	0.122197	0.471222	0.107205	0.527685	0.341356	0.0386693	0.470629	0.00328592	0.0601576	0.723574	0.22777	0.175158	0.35597	0.0305911
blue	ENSMUSG00000056300	100041433	Zfp981	zinc finger protein 981	0.116408	0.492639	-0.0564841	0.73985	-0.00446144	0.979093	0.183452	0.277103	0.143042	0.398344	0.166783	0.323833	0.0364568	0.830377	-0.108418	0.522997	-0.0089738	0.957961	-0.00852211	0.960075	-0.122034	0.471819	-0.0377399	0.824499	-0.161374	0.339993	-0.0234352	0.890496	0.0256196	0.880359	-0.0729779	0.667745	-0.00270361	0.987329
blue	ENSMUSG00000114827	NA	NA	NA	-0.298061	0.0731676	-0.097248	0.56692	0.0727217	0.668845	-0.278718	0.0948261	0.178978	0.28919	-0.233353	0.164533	-0.252624	0.131428	0.353223	0.0319934	0.0960811	0.571604	0.119137	0.482483	0.218777	0.193287	-0.200908	0.233129	0.147826	0.382587	0.231797	0.167445	-0.0303345	0.858546	0.0364845	0.83025	0.362819	0.0273136
blue	ENSMUSG00000047246	319179	Hist1h2be	histone cluster 1, H2be	-0.356785	0.0301851	-0.245778	0.142568	-0.0203773	0.904714	-0.630328	2.9e-05	0.495224	0.00183131	-0.0975427	0.56574	-0.298444	0.0727821	0.26842	0.108201	0.420315	0.0095938	0.370381	0.024037	0.00535625	0.974901	-0.0665666	0.695467	-0.244528	0.144675	-0.195298	0.246711	0.0446883	0.792836	-0.0798525	0.638495	0.0112325	0.947392
blue	ENSMUSG00000074345	244882	Tnfaip8l3	tumor necrosis factor, alpha-induced protein 8-like 3	0.657357	9.87e-06	0.457287	0.00443441	0.448215	0.00540092	0.721911	4.59e-07	-0.684698	2.96e-06	0.39436	0.0157241	0.577758	0.000180755	-0.552344	0.000393339	-0.396064	0.0152396	-0.112211	0.508471	-0.181786	0.281565	0.397026	0.0149715	-0.291545	0.079982	-0.0323129	0.849423	0.407305	0.0123475	0.158047	0.350173	-0.135965	0.422327
blue	ENSMUSG00000086358	NA	NA	NA	0.240521	0.151582	0.156552	0.354806	0.0527775	0.756386	0.272604	0.102605	-0.22577	0.17908	-0.0264683	0.876426	0.153963	0.362918	-0.187414	0.266678	-0.288854	0.0829357	-0.19094	0.257621	-0.0522788	0.758619	-0.145389	0.390567	0.11325	0.504529	0.110693	0.514259	-0.0151101	0.929272	-0.196341	0.244147	0.141714	0.402783
blue	ENSMUSG00000089669	69583	Tnfsf13	tumor necrosis factor (ligand) superfamily, member 13	-0.296776	0.0744741	0.140963	0.405307	-0.0919372	0.588379	-0.383619	0.0190863	0.0715372	0.673939	-0.0438138	0.796804	0.0217442	0.898355	0.286735	0.0853205	0.370892	0.0238279	-0.117454	0.488732	-0.221347	0.187977	-0.348974	0.0342657	0.551189	0.000406886	0.292043	0.0794441	-0.264482	0.113677	0.321426	0.0523942	0.116622	0.491838
blue	ENSMUSG00000006651	11803	Aplp1	amyloid beta (A4) precursor-like protein 1	-0.397622	0.0148074	-0.334144	0.0432517	-0.257012	0.124635	-0.440414	0.00637243	0.429711	0.00794735	-0.207468	0.217904	-0.368288	0.0249095	0.536642	0.000616943	0.377178	0.0213765	0.00809289	0.962084	0.130545	0.441226	-0.101332	0.550666	0.435968	0.00699057	0.318543	0.0546684	-0.223443	0.183721	0.339401	0.0398707	0.12283	0.468912
blue	ENSMUSG00000097207	320719	6030443J06Rik	RIKEN cDNA 6030443J06 gene	0.0407555	0.81072	-0.106541	0.530257	0.226492	0.177657	0.1173	0.489307	0.0511145	0.76384	0.0430419	0.800311	-0.00748537	0.964929	0.094095	0.579617	-0.0302182	0.859083	0.203681	0.226607	-0.0395154	0.81638	-0.166323	0.325188	-0.0664038	0.696177	0.102149	0.547441	0.182932	0.27849	0.122299	0.470851	0.155001	0.359654
blue	ENSMUSG00000105004	NA	NA	NA	0.192968	0.252504	0.202004	0.230537	0.190345	0.259134	0.431464	0.00766861	-0.351652	0.0328187	0.00662477	0.968959	0.136853	0.419272	-0.270749	0.105058	-0.460311	0.00414742	-0.30151	0.06975	0.267271	0.109778	0.271852	0.103594	0.0762807	0.653629	0.255738	0.126579	0.111299	0.511946	-0.321569	0.0522834	0.252228	0.132054
blue	ENSMUSG00000024245	68027	Tmem178	transmembrane protein 178	0.461907	0.00400253	0.48863	0.00215117	0.35623	0.030461	0.482866	0.0024698	-0.372117	0.0233326	0.283517	0.0890433	0.169154	0.316903	-0.0820877	0.629097	-0.415821	0.010479	-0.134277	0.428164	0.123918	0.464952	-0.0423888	0.803281	0.127377	0.452483	0.301473	0.0697855	0.141863	0.402285	-0.0684549	0.68726	0.00196227	0.990804
blue	ENSMUSG00000001103	18292	Sebox	SEBOX homeobox	-0.32707	0.0481632	-0.347668	0.0349903	-0.178668	0.29004	-0.557345	0.000339196	0.575773	0.000192516	-0.132161	0.435542	-0.330003	0.0460752	0.290587	0.0810242	0.669814	5.79e-06	0.276924	0.0970599	-0.0539474	0.751155	0.211947	0.207908	-0.0543575	0.749323	0.0214118	0.899901	-0.0669766	0.693683	0.170923	0.311792	0.00458703	0.978504
blue	ENSMUSG00000094152	381884	Slc6a16	solute carrier family 6, member 16	0.470184	0.00331959	0.224912	0.180781	0.0832392	0.624277	0.625842	3.44e-05	-0.350581	0.0333916	0.627528	3.22e-05	0.557616	0.000336462	-0.30517	0.0662612	-0.355569	0.0307928	-0.0749079	0.659482	-0.213762	0.203949	0.0764912	0.652733	-0.0173801	0.918679	0.0707642	0.677271	0.285922	0.086249	0.266624	0.110673	0.165064	0.328915
blue	ENSMUSG00000016024	16803	Lbp	lipopolysaccharide binding protein	-0.528066	0.000781724	-0.324079	0.0503701	-0.213404	0.204725	-0.904649	1.59e-14	0.609794	6.16e-05	-0.244695	0.144392	-0.4479	0.00543758	0.541725	0.000534573	0.762791	4.07e-08	0.453683	0.0047988	-0.0593091	0.727323	-0.137731	0.416265	-0.0693946	0.683189	-0.19187	0.255268	-0.114694	0.499074	0.202968	0.228271	-0.0518883	0.760369
blue	ENSMUSG00000109773	102637740	Gm34474	predicted gene, 34474	0.383925	0.0189828	0.127179	0.453195	0.212015	0.207759	0.52345	0.000885681	-0.332917	0.0440735	0.320717	0.0529462	0.260935	0.118785	-0.183854	0.276032	-0.158312	0.349354	-0.30086	0.0703844	-0.130608	0.441003	0.0414203	0.807691	-0.0200388	0.90629	0.200887	0.233181	-0.190334	0.259162	0.229317	0.172165	-0.166742	0.323953
blue	ENSMUSG00000021678	14063	F2rl1	coagulation factor II (thrombin) receptor-like 1	0.200362	0.234428	0.108402	0.52306	0.271719	0.103769	0.184472	0.274394	-0.114797	0.498687	0.0744116	0.661604	-0.217263	0.196462	0.217334	0.196313	0.0157335	0.926361	-0.146566	0.386701	0.273475	0.101467	0.101278	0.55088	0.00172867	0.991898	0.436311	0.00694106	-0.0201007	0.906002	0.0627603	0.712115	-0.333246	0.0438517
blue	ENSMUSG00000085178	NA	NA	NA	-0.394299	0.0157416	-0.458079	0.00435764	-0.419707	0.00970978	-0.359076	0.0290667	0.286441	0.0856552	-0.210549	0.210993	-0.0433619	0.798857	0.223591	0.183425	0.254168	0.129006	0.100502	0.553953	-0.241766	0.14941	-0.414607	0.0107297	0.202399	0.229608	-0.153926	0.363036	-0.144321	0.394095	0.226902	0.176852	-0.0122562	0.942605
blue	ENSMUSG00000097013	NA	NA	NA	0.351454	0.0329242	0.301455	0.0698032	0.0160791	0.924748	0.624989	3.55e-05	-0.530487	0.00073165	0.313672	0.058687	0.580271	0.000166793	-0.616393	4.86e-05	-0.43554	0.00705267	-0.169211	0.316736	-0.279958	0.0933052	0.119399	0.481511	0.019502	0.90879	-0.0141287	0.933855	0.0984643	0.562056	-0.195402	0.246455	0.0431217	0.799948
blue	ENSMUSG00000022754	56277	Tmem45a	transmembrane protein 45a	0.286938	0.0850898	0.478256	0.00275361	0.313508	0.0588263	0.405865	0.0126898	-0.28254	0.0901975	0.0697374	0.681706	-0.0546015	0.748234	-0.0166839	0.921926	-0.265397	0.112386	-0.097899	0.564314	0.320951	0.0527637	0.0714376	0.674368	0.185867	0.270718	0.594441	0.000104684	0.233493	0.164272	-0.128347	0.449022	0.0444927	0.793723
blue	ENSMUSG00000031298	237175	Adgrg2	adhesion G protein-coupled receptor G2	0.134523	0.427311	0.105792	0.533172	0.0770296	0.650444	0.43056	0.00781137	-0.277923	0.0958106	0.00684486	0.967928	-0.100928	0.552264	0.118179	0.486033	-0.322418	0.0516298	-0.252257	0.132007	0.348622	0.03446	0.0448361	0.792166	0.21018	0.211813	0.444961	0.00578942	0.0796027	0.639549	-0.123577	0.466191	0.122368	0.470597
blue	ENSMUSG00000113529	NA	NA	NA	-0.236989	0.157867	-0.0513131	0.762949	-0.17096	0.311687	-0.223883	0.182838	0.215589	0.200018	-0.00598643	0.971949	-0.0400459	0.813958	0.127616	0.45163	0.0994446	0.55815	0.180414	0.285273	0.0998803	0.556419	0.133717	0.43011	0.277154	0.096771	0.236042	0.159583	0.14878	0.37949	-0.0136088	0.936284	0.384337	0.0188441
blue	ENSMUSG00000097768	NA	NA	NA	0.24676	0.140929	-0.0604651	0.722217	-0.107028	0.52837	0.442967	0.00603914	-0.0489215	0.773702	0.25963	0.120708	0.26413	0.114177	-0.343939	0.0371274	-0.260382	0.119597	0.0195369	0.908627	0.00758046	0.964483	0.42373	0.00896469	-0.124423	0.46312	0.00575468	0.973034	0.00959451	0.955056	0.0500528	0.76861	0.346049	0.0359056
blue	ENSMUSG00000115545	NA	NA	NA	0.470399	0.00330331	0.15868	0.34822	0.216719	0.197613	0.477436	0.00280701	-0.270497	0.105395	0.302125	0.0691536	0.401816	0.0136954	-0.568736	0.000239946	-0.379667	0.0204656	-0.457124	0.00445039	-0.120092	0.478953	0.332013	0.0446867	-0.271489	0.104074	-0.199231	0.237136	-0.155817	0.357098	-0.15197	0.36924	0.123464	0.466603
blue	ENSMUSG00000040204	68026	Pclaf	PCNA clamp associated factor	-0.351371	0.032968	-0.165048	0.328961	0.078413	0.644577	-0.277894	0.0958473	0.245567	0.142923	-0.233187	0.164842	-0.287609	0.084331	0.199661	0.236105	0.149265	0.377919	0.34882	0.0343507	0.256003	0.126172	0.0225597	0.894564	-0.0358086	0.833351	0.205964	0.221332	0.292431	0.0790273	-0.196948	0.242663	-0.00242591	0.988631
blue	ENSMUSG00000030786	16409	Itgam	integrin alpha M	-0.353366	0.0319191	-0.360851	0.0282242	-0.338122	0.0406732	-0.526661	0.000812153	0.413391	0.0109858	-0.267541	0.109406	-0.48118	0.0025705	0.458623	0.0043056	0.434442	0.00721425	0.342749	0.0378318	0.132708	0.43363	-0.157203	0.352783	0.0126852	0.9406	0.00821605	0.961508	-0.178901	0.289399	-0.0390152	0.818665	-0.025154	0.882518
blue	ENSMUSG00000005267	170740	Zfp287	zinc finger protein 287	0.0864795	0.610798	0.212527	0.206636	0.226465	0.177709	0.174089	0.302779	-0.0415689	0.807013	-0.068746	0.685998	-0.10251	0.546019	0.0317226	0.852143	-0.102775	0.544977	0.0286846	0.866168	0.153619	0.364006	-0.0379887	0.82336	-0.020306	0.905046	0.179716	0.287172	0.170581	0.312776	-0.0902636	0.595215	-0.00652796	0.969412
blue	ENSMUSG00000044461	219134	Shisa2	shisa family member 2	-0.33008	0.046021	-0.248991	0.137255	-0.0804128	0.636134	-0.352355	0.0324476	0.254622	0.128301	-0.288983	0.0827917	-0.33204	0.0446683	0.327045	0.0481811	0.263837	0.114593	0.0780228	0.64623	0.170342	0.313465	-0.0185955	0.913013	0.283765	0.0887517	0.366515	0.0256688	0.050108	0.768362	-0.0419864	0.805112	-0.0847192	0.618105
blue	ENSMUSG00000014602	16560	Kif1a	kinesin family member 1A	0.405333	0.0128181	0.380052	0.0203277	0.324919	0.0497418	0.183329	0.277432	-0.206113	0.22099	0.3869	0.0180009	0.143464	0.396938	-0.0367675	0.828953	0.0779924	0.646359	-0.0246632	0.884795	-0.032562	0.848275	0.248642	0.137825	-0.0102025	0.952211	0.418604	0.00992311	0.198526	0.238832	0.175443	0.298974	-0.126363	0.456121
blue	ENSMUSG00000042106	68176	Inka1	inka box actin regulator 1	-0.236882	0.15806	-0.0236328	0.889578	-0.202101	0.230308	-0.153166	0.365438	0.146844	0.385791	-0.209697	0.212888	-0.0622918	0.714173	0.209496	0.213337	-0.00573821	0.973111	0.140777	0.405933	-0.0610055	0.719835	-0.311078	0.060921	0.0721348	0.671367	-0.0523237	0.758417	0.134608	0.427015	0.147992	0.382047	0.266254	0.111188
blue	ENSMUSG00000023467	56734	Tulp2	tubby-like protein 2	0.688828	2.44e-06	0.369623	0.0243499	0.393501	0.0159732	0.71591	6.32e-07	-0.527288	0.000798452	0.36167	0.0278423	0.462512	0.00394877	-0.554738	0.000366531	-0.441984	0.00616565	-0.321819	0.0520907	-0.218263	0.194362	0.0548922	0.746938	-0.118956	0.483154	0.0409271	0.809938	-0.0223928	0.895339	-0.0450664	0.791122	-0.212568	0.206547
blue	ENSMUSG00000117879	NA	NA	NA	-0.426268	0.0085202	-0.30743	0.0641765	-0.417174	0.0102055	-0.408365	0.0121006	0.421004	0.00946403	-0.00673838	0.968427	-0.203385	0.227297	0.237329	0.157254	0.341744	0.0384345	0.149341	0.377673	0.0161266	0.924527	-0.0419935	0.80508	0.0364391	0.830458	-0.131193	0.438941	-0.14236	0.40062	0.0192822	0.909814	-0.0771268	0.650031
blue	ENSMUSG00000031481	234129	Tpte	transmembrane phosphatase with tensin homology	-0.19757	0.241149	-0.105658	0.533691	0.13588	0.422618	-0.218944	0.192938	0.123808	0.465351	-0.226837	0.17698	-0.11573	0.495178	0.145948	0.388727	0.186331	0.269502	0.182976	0.278372	-0.122444	0.470321	-0.319719	0.0537309	0.0338003	0.842577	0.0614587	0.717838	0.0726063	0.669341	-0.0014413	0.993245	-0.0662545	0.696827
blue	ENSMUSG00000085282	327812	Gm15663	predicted gene 15663	0.340787	0.0390162	0.181204	0.283133	0.246479	0.141395	0.429204	0.00802954	-0.288056	0.0838279	0.242679	0.147832	0.197882	0.240392	-0.362322	0.0275411	-0.428476	0.00814888	-0.228627	0.173496	0.25995	0.120235	0.562928	0.000286712	-0.0365681	0.829867	0.22761	0.17547	0.0603747	0.722616	-0.254869	0.127918	0.0165103	0.922736
blue	ENSMUSG00000076937	NA	NA	NA	0.349325	0.0340734	0.257623	0.12371	0.235966	0.159722	0.355607	0.0307734	-0.224992	0.180622	0.324334	0.0501789	0.289831	0.081854	-0.19717	0.242122	-0.105906	0.532725	0.210132	0.211918	-0.153001	0.365959	0.160781	0.341791	-0.251089	0.133867	0.0845478	0.618819	0.313685	0.0586762	0.197501	0.241317	-0.181701	0.281793
blue	ENSMUSG00000079494	69049	Nat8f5	N-acetyltransferase 8 (GCN5-related) family member 5	0.169531	0.31581	-0.000673582	0.996843	-0.0738158	0.664153	0.295402	0.0758917	0.0639358	0.706959	0.489943	0.0020838	0.14656	0.38672	-0.168349	0.319243	0.0200725	0.906133	-0.093439	0.582275	-0.147818	0.382614	0.0499039	0.769279	-0.137562	0.416845	-0.171072	0.311365	-0.0758177	0.655601	0.0235737	0.889853	-0.132275	0.435142
blue	ENSMUSG00000059674	239096	Cdh24	cadherin-like 24	-0.337109	0.0413174	-0.284256	0.0881773	-0.289325	0.0824125	-0.472561	0.00314327	0.449574	0.00524548	-0.140203	0.407867	-0.434951	0.00713904	0.580939	0.000163248	0.542124	0.00052855	0.392439	0.0162859	0.183364	0.277337	0.117005	0.490407	0.0381314	0.822707	0.185133	0.272647	0.0788592	0.64269	0.360843	0.028228	-0.0557565	0.743087
blue	ENSMUSG00000052013	208154	Btla	B and T lymphocyte associated	0.187585	0.266234	0.170374	0.313372	0.138021	0.415278	0.449157	0.00529273	-0.332928	0.0440656	0.086818	0.609397	0.336151	0.0419344	-0.314953	0.0576077	-0.339536	0.0397867	0.243093	0.14712	-0.19174	0.255595	-0.119619	0.4807	-0.310356	0.0615554	-0.0619407	0.715717	0.499591	0.00164322	-0.0721754	0.671193	0.0635486	0.708656
blue	ENSMUSG00000025855	19085	Prkar1b	protein kinase, cAMP dependent regulatory, type I beta	-0.196901	0.242778	-0.185569	0.2715	0.119527	0.481039	-0.266961	0.110206	0.09901	0.55988	-0.0782893	0.645101	-0.0865155	0.610649	0.220744	0.189213	0.224229	0.182144	0.392001	0.0164162	-0.0702669	0.679417	-0.24081	0.151076	-0.0309551	0.855682	0.218958	0.192908	0.123975	0.464746	0.0665744	0.695434	0.0089483	0.95808
blue	ENSMUSG00000020811	216881	Wscd1	WSC domain containing 1	0.258999	0.121646	0.107802	0.525376	0.0955767	0.573634	0.418252	0.00999185	0.0124744	0.941586	0.292276	0.0791938	0.181161	0.283249	-0.113062	0.50524	-0.128799	0.447411	0.00446782	0.979063	-0.105799	0.533145	0.0765282	0.652576	-0.0652287	0.701304	0.238709	0.154784	0.25425	0.128879	0.236104	0.159471	0.0516165	0.761587
blue	ENSMUSG00000028525	18578	Pde4b	phosphodiesterase 4B, cAMP specific	0.389042	0.0173205	0.253731	0.129688	0.411994	0.0112864	0.438659	0.00661049	-0.474602	0.00299845	0.100717	0.553101	0.472669	0.00313543	-0.557062	0.000342079	-0.225603	0.17941	-0.00302049	0.985844	-0.372485	0.0231857	0.163315	0.334137	-0.19212	0.254636	-0.0998934	0.556367	0.321405	0.0524112	-0.0353526	0.835443	-0.155437	0.358286
blue	ENSMUSG00000028712	666168	Cyp4a31	cytochrome P450, family 4, subfamily a, polypeptide 31	0.159757	0.344916	0.196005	0.244971	0.196914	0.242746	0.210649	0.210772	-0.208162	0.216332	0.283486	0.0890797	0.0569496	0.737781	0.0591895	0.727853	-0.0788905	0.642557	0.161218	0.340465	0.103968	0.540294	0.0173858	0.918652	-0.0881192	0.604025	0.272358	0.102928	0.281575	0.0913492	0.0283984	0.867492	-0.00496139	0.97675
blue	ENSMUSG00000089712	NA	NA	NA	0.363387	0.0270552	0.299407	0.0718188	0.110707	0.514205	0.671474	5.38e-06	-0.496598	0.00177016	0.192929	0.252604	0.298031	0.0731987	-0.187941	0.265311	-0.683332	3.15e-06	-0.420084	0.00963775	0.228874	0.173018	-0.0952725	0.57486	0.309554	0.0622649	0.374775	0.0222876	0.0202552	0.905282	-0.064465	0.704642	0.329365	0.0465232
blue	ENSMUSG00000096995	100504687	2810029C07Rik	RIKEN cDNA 2810029C07 gene	0.0546573	0.747986	0.129624	0.444482	0.0518823	0.760395	0.30348	0.0678546	-0.349004	0.0342494	0.203979	0.225913	0.358214	0.0294835	-0.218923	0.192981	-0.425483	0.00865554	0.0412876	0.808295	0.033459	0.844146	-0.000944952	0.995571	0.128486	0.448525	0.0959017	0.572326	0.254146	0.129041	-0.0648987	0.702746	0.227537	0.175611
blue	ENSMUSG00000055494	NA	NA	NA	0.0748078	0.65991	0.0961526	0.571316	0.110256	0.515932	0.0593056	0.727339	-0.0808344	0.63436	-0.0672032	0.692697	-0.0945248	0.577879	0.174045	0.302903	-0.0672141	0.692649	0.144245	0.394347	0.192377	0.253989	-0.0287922	0.865671	0.0724342	0.67008	0.248191	0.138564	0.255403	0.127094	0.0040681	0.980936	0.120042	0.479136
blue	ENSMUSG00000072966	245607	Gprasp2	G protein-coupled receptor associated sorting protein 2	0.264688	0.113386	0.285729	0.0864716	0.390788	0.0167819	0.376059	0.0217966	-0.190024	0.259954	0.0512905	0.76305	0.0997192	0.557058	-0.227239	0.176193	-0.35728	0.0299403	-0.135212	0.424923	0.207133	0.218663	0.346178	0.0358319	0.0920608	0.587876	0.406802	0.0124662	0.141919	0.402098	-0.204353	0.225045	0.192602	0.253422
blue	ENSMUSG00000057914	12296	Cacnb2	calcium channel, voltage-dependent, beta 2 subunit	0.261584	0.117838	0.416352	0.0103709	0.348765	0.0343812	0.254136	0.129056	-0.232475	0.166171	0.0974544	0.566093	0.274184	0.10055	-0.307891	0.063758	-0.228823	0.173117	-0.22546	0.179693	-0.17051	0.31298	-0.0536202	0.752617	0.220922	0.188847	0.114223	0.500851	-0.027462	0.871824	-0.15635	0.355436	0.255164	0.127462
blue	ENSMUSG00000056753	NA	NA	NA	-0.0325817	0.848185	-0.125028	0.460932	0.0526937	0.756761	-0.463604	0.00385341	0.29896	0.0722649	0.0648561	0.702932	-0.086706	0.60986	0.0929977	0.584066	0.333534	0.0436583	0.134653	0.426859	-0.186918	0.267968	-0.0867731	0.609583	-0.0939467	0.580217	-0.0771388	0.64998	-0.130178	0.442524	-0.0168667	0.921073	0.010952	0.948704
blue	ENSMUSG00000061540	18406	Orm2	orosomucoid 2	-0.414216	0.0108114	-0.277411	0.0964494	-0.107744	0.5256	-0.788863	6.65e-09	0.389263	0.0172515	-0.304027	0.067336	-0.261338	0.118196	0.229701	0.171429	0.463044	0.00390202	0.388734	0.0174169	-0.120146	0.478755	-0.197968	0.240184	-0.189078	0.262377	-0.393263	0.0160427	-0.141053	0.405005	-0.102594	0.545688	0.0177476	0.916965
blue	ENSMUSG00000081189	NA	NA	NA	0.348951	0.0342784	0.0653984	0.700562	0.029195	0.863809	0.38509	0.0185931	-0.390478	0.0168767	0.0954529	0.574133	0.473185	0.00309835	-0.542703	0.000519905	-0.52937	0.000754381	-0.249273	0.136797	-0.132422	0.434627	0.110899	0.513474	0.125424	0.459501	-0.088009	0.604479	0.0570691	0.73725	-0.270149	0.105861	0.35965	0.028792
blue	ENSMUSG00000078680	100039008	Mup10	major urinary protein 10	-0.454444	0.0047197	-0.421979	0.00928266	-0.221885	0.186877	-0.535948	0.000629016	0.554407	0.000370137	-0.337749	0.0409094	-0.412925	0.0110854	0.385658	0.0184054	0.397175	0.0149304	0.158811	0.347818	0.0851594	0.616275	-0.0704405	0.678668	0.0855587	0.614616	0.0321371	0.850233	-0.287615	0.0843239	0.135265	0.424741	0.0332942	0.844905
blue	ENSMUSG00000045502	80885	Hcar2	hydroxycarboxylic acid receptor 2	-0.209228	0.213936	-0.0475539	0.779869	-0.0113889	0.946661	-0.232207	0.166674	0.0845502	0.618809	-0.244027	0.145526	-0.270132	0.105884	0.104931	0.536529	0.249649	0.136187	0.377051	0.0214239	0.214076	0.203269	0.320254	0.0533093	-0.1906	0.258484	-0.0888493	0.601019	0.109851	0.517484	-0.0888719	0.600926	0.0474864	0.780174
blue	ENSMUSG00000024131	20532	Slc3a1	solute carrier family 3, member 1	-0.637185	2.23e-05	-0.459038	0.00426625	-0.394918	0.015564	-0.918359	1.18e-15	0.628797	3.07e-05	-0.446996	0.00554379	-0.477067	0.0028313	0.433311	0.007384	0.602115	8.06e-05	0.244057	0.145474	0.0276952	0.870745	-0.181816	0.281483	0.0604494	0.722287	-0.219059	0.192698	-0.369067	0.0245816	-0.0589673	0.728836	0.0533922	0.753636
blue	ENSMUSG00000022494	72555	Shisa9	shisa family member 9	0.308836	0.0629061	0.210428	0.211261	0.190995	0.257481	0.250342	0.135066	-0.0528566	0.756032	-0.00552369	0.974116	-0.155748	0.357315	-0.0313151	0.854022	-0.168271	0.319473	-0.300242	0.0709918	0.345633	0.0361438	0.301084	0.0701653	0.0673489	0.692063	0.37497	0.0222125	-0.174783	0.300826	-0.153838	0.363314	0.182554	0.279503
blue	ENSMUSG00000062209	13869	Erbb4	erb-b2 receptor tyrosine kinase 4	0.637967	2.16e-05	0.307377	0.0642247	0.321185	0.0525821	0.808068	1.48e-09	-0.526414	0.00081762	0.375749	0.0219144	0.505574	0.00141319	-0.582486	0.000155302	-0.722517	4.44e-07	-0.282233	0.0905627	-0.00480528	0.977482	0.230446	0.170004	-0.0710988	0.675828	0.0124985	0.941473	0.168583	0.318564	-0.162641	0.336162	0.158924	0.34747
blue	ENSMUSG00000060807	12401	Serpina6	serine (or cysteine) peptidase inhibitor, clade A, member 6	0.592466	0.000111854	0.463077	0.00389915	0.433458	0.00736179	0.866937	3.99e-12	-0.764839	3.56e-08	0.149405	0.377469	0.447207	0.00551873	-0.55095	0.000409745	-0.860515	8.63e-12	-0.383459	0.0191407	0.106737	0.529497	0.0534016	0.753594	0.0816008	0.631139	0.208061	0.216561	0.174074	0.302822	-0.315477	0.0571716	0.0860827	0.612442
blue	ENSMUSG00000014704	15399	Hoxa2	homeobox A2	-0.214074	0.203274	-0.226576	0.177491	-0.253132	0.130627	-0.121106	0.475223	0.0152598	0.928573	0.123265	0.467327	0.130383	0.441799	0.0467601	0.783455	0.226205	0.178222	0.0369515	0.82811	-0.173511	0.304411	0.0227998	0.893447	0.0557845	0.742962	0.0282603	0.868131	-0.0411559	0.808895	0.108684	0.521972	0.0294786	0.862499
blue	ENSMUSG00000005947	16407	Itgae	integrin alpha E, epithelial-associated	-0.0824863	0.627427	0.0129971	0.939142	-0.00478819	0.977562	-0.151099	0.372022	-0.129339	0.445493	0.0179992	0.915792	-0.0469381	0.782651	0.24391	0.145725	0.11215	0.508704	0.102656	0.545444	-0.0154245	0.927804	-0.194493	0.248703	0.180885	0.283997	0.336414	0.0417643	0.0368955	0.828366	0.0506479	0.765935	-0.0790352	0.641946
blue	ENSMUSG00000025422	216439	Agap2	ArfGAP with GTPase domain, ankyrin repeat and PH domain 2	-0.679281	3.79e-06	-0.339347	0.0399041	-0.652287	1.22e-05	-0.801434	2.53e-09	0.578338	0.000177444	-0.178747	0.289821	-0.42651	0.0084787	0.684286	3.01e-06	0.715109	6.59e-07	0.181937	0.281159	0.00568552	0.973358	-0.168962	0.317461	0.238206	0.155681	-0.0664591	0.695936	-0.255087	0.127581	0.397933	0.0147225	-0.0308689	0.85608
blue	ENSMUSG00000099913	NA	NA	NA	0.173744	0.303752	0.326002	0.0489419	0.270141	0.105872	-0.127428	0.452302	-0.158166	0.349804	0.0583734	0.731465	0.0207191	0.903124	0.0407968	0.810532	0.151185	0.371746	-0.0146277	0.931524	-0.0432176	0.799512	-0.0546064	0.748213	-0.0484835	0.775675	0.00924213	0.956705	-0.0436966	0.797336	0.0844946	0.61904	-0.200662	0.233714
blue	ENSMUSG00000093610	638988	Cyp2c53-ps	cytochrome P450, family 2, subfamily c, polypeptide 53-ps	0.167642	0.321309	-0.0815205	0.631476	0.0680049	0.689213	0.453112	0.00485874	0.0332168	0.845261	0.0471512	0.781688	0.101871	0.548537	-0.282951	0.089711	-0.481397	0.00255734	-0.00592897	0.972218	0.164012	0.33205	0.172149	0.308283	-0.132854	0.43312	-0.0727892	0.668556	0.14182	0.402429	-0.193991	0.249951	0.346021	0.0359216
blue	ENSMUSG00000098661	102465637	Mir7052	microRNA 7052	0.116046	0.493994	0.197027	0.242469	-0.116958	0.490583	-0.0637213	0.707899	-0.133563	0.430647	0.275829	0.0984429	0.151292	0.371405	-0.0343094	0.840236	0.0809999	0.633664	0.194575	0.2485	-0.038832	0.819503	0.0837634	0.622088	0.0819015	0.629878	0.0494503	0.77132	0.170867	0.311955	-0.0311044	0.854994	0.233873	0.163567
blue	ENSMUSG00000056531	73254	Ccdc18	coiled-coil domain containing 18	0.284246	0.0881889	0.269572	0.106637	0.14316	0.397952	0.259461	0.120958	-0.264543	0.113591	0.108766	0.521655	0.205717	0.221899	-0.196253	0.244362	-0.377551	0.0212379	-0.123052	0.468101	0.164716	0.329951	0.242267	0.148544	0.0980911	0.563547	0.080412	0.636137	0.0922774	0.586994	0.00630997	0.970433	0.283119	0.0895123
blue	ENSMUSG00000082284	NA	NA	NA	0.0606017	0.721615	-0.0824604	0.627535	0.050705	0.765679	0.18387	0.275992	-0.0524633	0.757792	-0.052504	0.75761	-0.0502505	0.767721	-0.0644881	0.704541	-0.189268	0.261889	0.0827267	0.626421	0.250813	0.13431	0.153621	0.364	-0.0103111	0.951702	0.1461	0.388229	0.179746	0.287091	-0.0368163	0.828729	0.0301742	0.859286
blue	ENSMUSG00000021214	105349	Akr1c18	aldo-keto reductase family 1, member C18	-0.161204	0.340508	-0.051695	0.761235	-0.183831	0.276093	-0.094224	0.579095	-0.0978659	0.564447	-0.233009	0.165172	-0.0483978	0.776062	0.144083	0.394883	-0.0133031	0.937712	0.0408192	0.81043	0.112144	0.508727	-0.125516	0.459169	0.0912435	0.591208	0.0197064	0.907838	0.0211125	0.901293	0.039231	0.817679	-0.00286258	0.986584
blue	ENSMUSG00000027514	58203	Zbp1	Z-DNA binding protein 1	-0.388291	0.0175565	-0.121295	0.474526	-0.0526597	0.756913	-0.64595	1.58e-05	0.25875	0.122016	-0.109538	0.518687	-0.219437	0.191913	0.288308	0.0835457	0.455913	0.0045704	0.531142	0.000718604	0.0419542	0.805259	0.0379047	0.823744	-0.117519	0.488489	-0.0682231	0.688266	0.304885	0.0665277	0.0132249	0.938077	-0.108787	0.521573
blue	ENSMUSG00000038370	66425	Pcp4l1	Purkinje cell protein 4-like 1	-0.0684914	0.687102	-0.166716	0.324029	0.139953	0.408713	0.257379	0.124078	0.198972	0.237759	-0.161004	0.341115	-0.255589	0.126807	0.237816	0.156379	-0.280017	0.0932325	-0.171338	0.310602	0.325077	0.0496247	-0.252401	0.131779	0.25782	0.123412	0.457932	0.00437181	-0.0385788	0.82066	-0.0539179	0.751286	0.23116	0.168649
blue	ENSMUSG00000045776	319476	Lrtm1	leucine-rich repeats and transmembrane domains 1	0.584198	0.000146911	0.31846	0.0547348	0.257055	0.124569	0.712302	7.63e-07	-0.550744	0.000412213	0.370274	0.0240808	0.638079	2.15e-05	-0.76229	4.2e-08	-0.64958	1.36e-05	-0.332895	0.0440882	-0.273919	0.100892	0.0864163	0.61106	-0.11754	0.488411	-0.329223	0.0466229	0.00666354	0.968777	-0.289104	0.0826581	0.102147	0.547447
blue	ENSMUSG00000113238	NA	NA	NA	0.405217	0.0128463	0.208627	0.215286	0.24678	0.140896	0.566573	0.000256495	-0.274423	0.100242	0.240509	0.151603	0.410167	0.0116902	-0.524729	0.000855708	-0.290527	0.08109	-0.083538	0.623029	-0.270229	0.105754	0.110379	0.515461	-0.139761	0.409364	0.0105511	0.95058	0.0704252	0.678734	0.00413743	0.980611	0.0539697	0.751055
blue	ENSMUSG00000000440	19016	Pparg	peroxisome proliferator activated receptor gamma	0.663236	7.69e-06	0.453898	0.00477632	0.339204	0.0399934	0.677228	4.16e-06	-0.602448	7.97e-05	0.414546	0.0107424	0.253882	0.129452	-0.300319	0.0709155	-0.34364	0.0373036	-0.234797	0.161862	0.110249	0.515961	0.387243	0.0178904	-0.093022	0.583967	0.179649	0.287356	0.206062	0.221106	-0.0233521	0.890882	-0.117752	0.487622
blue	ENSMUSG00000026839	76654	Upp2	uridine phosphorylase 2	0.530466	0.000732083	0.290595	0.0810152	0.293885	0.0774807	0.794232	4.44e-09	-0.646075	1.57e-05	0.275337	0.09907	0.648422	1.43e-05	-0.697337	1.62e-06	-0.84734	3.75e-11	-0.390418	0.0168948	-0.0705867	0.678037	0.146623	0.386514	0.0822917	0.628242	0.076167	0.654113	0.073154	0.66699	-0.212692	0.206277	0.169121	0.316996
blue	ENSMUSG00000105506	NA	NA	NA	-0.291647	0.0798712	-0.12485	0.461574	-0.0677197	0.690451	-0.356714	0.0302203	0.223035	0.184545	-0.250229	0.135248	-0.256809	0.124943	0.399804	0.0142199	0.203196	0.22774	0.236616	0.158542	0.073976	0.663467	-0.427692	0.00827912	0.256706	0.125099	0.211797	0.208237	0.115543	0.495882	0.0401426	0.813517	0.19313	0.252098
blue	ENSMUSG00000048424	223332	Ranbp3l	RAN binding protein 3-like	0.247649	0.139456	0.101674	0.549316	0.0551774	0.745667	0.582893	0.000153266	-0.254193	0.128967	0.161287	0.340255	0.375877	0.0218657	-0.501667	0.00155991	-0.400196	0.0141164	-0.29939	0.071836	-0.0933952	0.582452	0.266328	0.111085	0.0748405	0.65977	-0.0562018	0.741105	-0.056634	0.739184	-0.0592845	0.727432	0.259914	0.120287
blue	ENSMUSG00000000244	27027	Tspan32	tetraspanin 32	-0.0972902	0.566751	-0.0373351	0.826352	-0.103463	0.542271	0.0877896	0.605384	-0.0589968	0.728705	0.0397629	0.81525	0.128515	0.448423	-0.0917453	0.589161	-0.060739	0.721009	0.180185	0.285895	0.032052	0.850625	0.174783	0.300826	0.0512321	0.763312	0.131239	0.438781	0.258544	0.122326	0.039601	0.815989	0.0383135	0.821874
blue	ENSMUSG00000047227	217648	Gm527	predicted gene 527	-0.625974	3.42e-05	-0.427039	0.00838898	-0.376218	0.0217366	-0.809407	1.32e-09	0.567705	0.00024771	-0.355368	0.0308942	-0.545066	0.000485914	0.598648	9.08e-05	0.606932	6.82e-05	0.300579	0.0706601	0.126109	0.457035	-0.320787	0.0528915	0.0692945	0.683622	-0.0413395	0.808059	-0.205807	0.221692	0.032349	0.849257	-0.0745115	0.661176
blue	ENSMUSG00000114575	NA	NA	NA	0.102984	0.544155	0.0146249	0.931537	0.0176803	0.917279	0.28464	0.0877307	-0.0332094	0.845295	-0.00112615	0.994722	0.0772641	0.649448	0.0231859	0.891654	-0.309115	0.0626562	-0.152787	0.366638	0.0768242	0.651317	-0.149282	0.377866	0.306593	0.0649423	0.166355	0.325092	-0.0233519	0.890883	0.124757	0.461912	0.287914	0.0839869
blue	ENSMUSG00000046056	282619	Sbsn	suprabasin	0.351779	0.0327516	0.123648	0.465933	0.2229	0.184818	0.55076	0.000412019	-0.443368	0.00598817	0.297369	0.073869	0.574732	0.000198952	-0.419175	0.00981208	-0.358654	0.0292702	-0.307538	0.064078	-0.368548	0.0247997	-0.11449	0.499843	0.286625	0.0854459	0.256564	0.125315	0.0537181	0.752179	0.0932394	0.583084	0.0499555	0.769047
blue	ENSMUSG00000041798	103988	Gck	glucokinase	0.280857	0.0922139	0.324968	0.0497054	0.217459	0.196051	0.321794	0.0521099	-0.296566	0.0746893	-0.206224	0.220737	-0.300366	0.0708699	0.18921	0.262038	-0.317264	0.0557017	-0.201016	0.232874	0.459681	0.00420588	-0.132248	0.435237	0.122867	0.468776	0.389276	0.0172474	0.0662655	0.696779	-0.17425	0.302324	-0.118823	0.483643
blue	ENSMUSG00000034774	211924	Dsg1c	desmoglein 1 gamma	0.513847	0.00114197	0.327177	0.0480858	0.240816	0.151066	0.812187	1.05e-09	-0.611161	5.87e-05	0.123275	0.467292	0.492791	0.00194407	-0.558621	0.000326498	-0.839163	8.73e-11	-0.520696	0.000953359	0.0675158	0.691338	0.118027	0.486601	0.269212	0.107125	0.225089	0.18043	-0.0559755	0.742112	-0.22552	0.179574	0.296985	0.074261
blue	ENSMUSG00000074215	NA	NA	NA	-0.0873982	0.606999	0.00415172	0.980544	-0.129502	0.444915	-0.265095	0.112812	0.184413	0.27455	0.210476	0.211155	0.0858084	0.613579	0.054487	0.748746	0.273685	0.101195	0.196771	0.243095	-0.16902	0.317292	0.00601161	0.971831	-0.0611464	0.719214	-0.00566345	0.973461	0.174688	0.301093	0.123836	0.46525	-0.0035258	0.983477
blue	ENSMUSG00000096959	NA	NA	NA	-0.354201	0.0314882	-0.183368	0.277327	-0.167588	0.321469	-0.389116	0.0172975	0.216968	0.197086	-0.322552	0.0515275	-0.273857	0.100972	0.12525	0.460128	0.128043	0.450104	0.156114	0.356171	0.183929	0.275834	0.0173687	0.918732	-0.201414	0.231931	-0.210138	0.211905	-0.115012	0.497876	-0.250212	0.135275	0.0252656	0.882001
blue	ENSMUSG00000061724	NA	NA	NA	0.294068	0.0772876	0.177684	0.292747	0.0713837	0.6746	0.426404	0.00849695	-0.375897	0.0218582	0.349087	0.0342037	0.296087	0.0751829	-0.142747	0.399328	-0.236931	0.157972	-0.32827	0.0472996	-0.143735	0.396037	-0.132788	0.433351	0.0229896	0.892566	0.139376	0.410666	0.0835787	0.622859	0.0435544	0.797982	-0.143446	0.397001
blue	ENSMUSG00000028051	15168	Hcn3	hyperpolarization-activated, cyclic nucleotide-gated K+ 3	0.33322	0.0438693	0.181982	0.281036	0.306433	0.0650901	0.406409	0.0125595	-0.170049	0.314312	-0.230197	0.170479	-0.263385	0.115239	0.0251929	0.882338	-0.350358	0.0335118	-0.0881776	0.603784	0.514479	0.00112327	0.269148	0.107211	-0.0849651	0.617082	0.191269	0.256786	0.175881	0.297753	-0.0806618	0.635086	-0.0697224	0.681771
blue	ENSMUSG00000051076	242122	Vtcn1	V-set domain containing T cell activation inhibitor 1	-0.00944686	0.955747	-0.0453854	0.789677	-0.030855	0.856144	0.231803	0.167434	-0.1176	0.488191	-0.0686392	0.686461	-0.0289321	0.865024	0.0938801	0.580487	-0.0996882	0.557182	0.0971356	0.567371	0.0757116	0.656053	-0.0437013	0.797315	0.232061	0.166948	0.417715	0.0100979	0.206904	0.219184	0.0298218	0.860913	-0.0753852	0.657445
blue	ENSMUSG00000106891	NA	NA	NA	0.113096	0.505112	0.162802	0.335677	-0.0514873	0.762167	0.260136	0.11996	-0.204243	0.225301	0.139547	0.410088	-0.0922405	0.587144	0.0767773	0.651517	-0.104364	0.538744	0.144589	0.39321	0.246033	0.14214	0.16476	0.329819	-0.0554567	0.744422	0.137256	0.417893	0.242626	0.147925	-0.0500344	0.768692	-0.00442971	0.979241
blue	ENSMUSG00000031270	75125	4930513O06Rik	RIKEN cDNA 4930513O06 gene	0.543378	0.000509986	0.358098	0.0295401	0.309894	0.0619633	0.506957	0.00136422	-0.460905	0.00409297	0.284919	0.087406	0.391267	0.0166366	-0.477078	0.00283055	-0.363586	0.0269654	-0.500039	0.00162491	-0.0487763	0.774356	0.198906	0.237917	0.103782	0.541023	0.0479224	0.778206	-0.294681	0.076643	-0.103884	0.540622	0.0791259	0.641562
blue	ENSMUSG00000116165	57028	Pdxp	pyridoxal (pyridoxine, vitamin B6) phosphatase	-0.0511888	0.763506	0.000479056	0.997755	-0.236349	0.159025	0.0556752	0.743449	-0.0644163	0.704855	0.274731	0.0998448	0.0171941	0.919546	0.102288	0.546893	-0.0273528	0.87233	-0.0632951	0.709768	0.0607457	0.72098	-0.182798	0.278849	0.231955	0.167148	0.171188	0.311032	-0.0878435	0.605161	-0.117287	0.489355	0.150056	0.37537
blue	ENSMUSG00000056973	104158	Ces1d	carboxylesterase 1D	0.496662	0.00176737	0.300683	0.0705583	0.207393	0.218073	0.895112	7.82e-14	-0.534577	0.000653504	0.243834	0.145853	0.325528	0.0492906	-0.405013	0.0128959	-0.747201	1.08e-07	-0.439602	0.00648164	0.15159	0.370451	0.0654896	0.700164	0.166794	0.3238	0.286627	0.0854439	0.0567872	0.738503	-0.216247	0.198615	0.1114	0.511562
blue	ENSMUSG00000084793	NA	NA	NA	0.620342	4.21e-05	0.318906	0.0543774	0.304801	0.066607	0.673871	4.84e-06	-0.569516	0.000234219	0.431057	0.00773263	0.715775	6.36e-07	-0.726866	3.5e-07	-0.620547	4.18e-05	-0.231577	0.16786	-0.182753	0.278969	0.359992	0.0286294	-0.14154	0.403366	-0.114925	0.498205	0.166091	0.325873	-0.060064	0.723988	0.239493	0.153393
blue	ENSMUSG00000045790	100503884	Ccdc149	coiled-coil domain containing 149	-0.761294	4.49e-08	-0.515104	0.00110506	-0.340163	0.0393992	-0.780869	1.19e-08	0.664033	7.44e-06	-0.495587	0.00181497	-0.677678	4.08e-06	0.574632	0.00019958	0.632081	2.71e-05	0.283926	0.0885636	0.226048	0.178531	-0.0948824	0.576434	0.0273788	0.872209	0.0424445	0.803028	-0.16626	0.325372	-0.0878585	0.605099	-0.0962206	0.571043
blue	ENSMUSG00000088008	NA	NA	NA	-0.111241	0.512168	-0.124825	0.461665	-0.305868	0.0656115	-0.281318	0.091658	0.178766	0.28977	0.0913661	0.590708	-0.167468	0.32182	0.2975	0.0737363	0.317337	0.0556421	-0.119709	0.480366	0.0312058	0.854526	0.0543352	0.749423	0.0447412	0.792596	0.0233767	0.890767	-0.279675	0.0936505	0.100784	0.552835	-0.146594	0.386609
blue	ENSMUSG00000113387	NA	NA	NA	-0.23221	0.166668	-0.0796726	0.639254	0.204405	0.224926	-0.454201	0.00474489	0.437771	0.00673389	-0.206837	0.219337	-0.386658	0.0180792	0.296746	0.0745049	0.51081	0.00123564	0.316164	0.0566028	0.102793	0.544905	0.209392	0.21357	-0.118189	0.486	0.0816455	0.630951	0.0772211	0.649631	0.120302	0.478177	-0.000984055	0.995388
blue	ENSMUSG00000112160	666584	BC024063	cDNA sequence BC024063	-0.199757	0.235873	-0.000642533	0.996989	-0.128048	0.450086	-0.391694	0.0165081	0.314281	0.0581722	-0.244102	0.145398	-0.500243	0.00161663	0.503829	0.00147714	0.417103	0.0102196	0.363445	0.027029	0.220836	0.189023	-0.127954	0.450423	-0.119835	0.479902	-0.0149457	0.930039	0.104667	0.537558	0.106881	0.52894	-0.15031	0.374552
blue	ENSMUSG00000019590	13056	Cyb561	cytochrome b-561	-0.477394	0.00280974	-0.246489	0.14138	-0.259665	0.120656	-0.865538	4.73e-12	0.419484	0.00975249	-0.150824	0.372901	-0.300633	0.0706067	0.411	0.0115046	0.653892	1.14e-05	0.251509	0.133196	-0.0870544	0.60842	-0.140652	0.406354	0.0434348	0.798525	-0.127788	0.451017	-0.210757	0.210532	0.082667	0.62667	-0.0675599	0.691146
blue	ENSMUSG00000039347	76252	Atp6v0e2	ATPase, H+ transporting, lysosomal V0 subunit E2	-0.12363	0.465997	0.131295	0.438583	0.0545775	0.748342	-0.216033	0.199072	0.0809779	0.633756	0.223932	0.18274	0.122842	0.468869	0.0593075	0.72733	0.238618	0.154945	0.193531	0.251097	-0.232774	0.165613	-0.169543	0.315775	0.0964953	0.569939	0.286828	0.0852142	0.108129	0.524111	0.106344	0.531023	-0.0741435	0.66275
blue	ENSMUSG00000074912	100043609	Gm14207	predicted gene 14207	-0.0158115	0.925997	0.0040447	0.981045	-0.00694042	0.967481	-0.0157757	0.926164	0.0584139	0.731286	0.0343743	0.839937	0.0701764	0.679808	-0.0461823	0.786069	-0.0452476	0.790301	0.0421438	0.804396	0.0147928	0.930753	0.0434574	0.798423	0.157075	0.353181	0.223172	0.184269	0.0596141	0.725975	-0.0396931	0.815568	0.287674	0.0842572
blue	ENSMUSG00000074232	NA	NA	NA	-0.298161	0.0730667	-0.381781	0.0197178	-0.460575	0.00412314	-0.438463	0.00663757	0.355573	0.0307904	-0.0539824	0.750998	-0.00322198	0.9849	-0.000127105	0.999404	0.316274	0.0565122	0.0939503	0.580203	-0.221551	0.187558	0.0252425	0.882108	-0.0819521	0.629665	-0.348992	0.0342558	-0.199492	0.236509	-0.0227735	0.89357	0.0991571	0.559295
blue	ENSMUSG00000049303	171180	Syt12	synaptotagmin XII	-0.394722	0.01562	-0.24892	0.137372	-0.277974	0.0957478	-0.731598	2.69e-07	0.317919	0.0551704	-0.0498098	0.769703	-0.0922114	0.587262	0.222055	0.186532	0.675092	4.58e-06	0.392954	0.0161336	-0.34642	0.0356943	-0.211698	0.208456	-0.093108	0.583618	-0.257452	0.123967	0.00470709	0.977942	0.119651	0.480581	-0.230496	0.16991
blue	ENSMUSG00000047497	239337	Adamts12	a disintegrin-like and metallopeptidase (reprolysin type) with thrombospondin type 1 motif, 12	-0.397225	0.0149165	-0.239573	0.15325	-0.123311	0.46716	-0.33011	0.0460001	0.288372	0.083474	-0.405254	0.0128373	-0.239506	0.153369	0.267019	0.110127	0.103912	0.540511	0.250898	0.134173	0.0816642	0.630873	-0.239897	0.152679	0.152558	0.367366	-0.0206286	0.903544	-0.0305314	0.857637	0.0472612	0.781192	0.321268	0.0525172
blue	ENSMUSG00000090236	80733	Car15	carbonic anhydrase 15	0.168174	0.319755	-0.029087	0.864308	0.270658	0.10518	0.19927	0.237042	0.0554671	0.744376	-0.100712	0.55312	-0.104461	0.538363	-0.00822056	0.961487	-0.196735	0.243182	-0.213642	0.204209	0.261961	0.11729	0.25905	0.12157	-0.107517	0.526477	0.0637612	0.707724	0.0682827	0.688007	0.00925013	0.956667	0.0152543	0.928598
blue	ENSMUSG00000020363	14584	Gfpt2	glutamine fructose-6-phosphate transaminase 2	-0.377766	0.0211582	-0.217304	0.196377	-0.254564	0.12839	-0.290309	0.0813282	0.159384	0.346058	-0.269976	0.106094	-0.290501	0.0811175	0.294144	0.0772074	0.0869255	0.608953	0.127064	0.453606	0.255574	0.126831	-0.076912	0.650944	0.182917	0.278531	0.124159	0.464078	0.131427	0.438119	-0.0692725	0.683717	-0.193275	0.251736
blue	ENSMUSG00000046275	237858	Trarg1	trafficking regulator of GLUT4 (SLC2A4) 1	-0.109811	0.51764	-0.0686553	0.686391	0.0198581	0.907131	-0.15124	0.37157	0.0625199	0.713171	-0.0451849	0.790585	0.0123015	0.942394	0.0328944	0.846745	-0.0484029	0.776039	0.15618	0.355966	-0.00738844	0.965383	-0.189815	0.260487	0.0759134	0.655193	0.0854722	0.614975	0.221837	0.186976	-0.118911	0.483318	0.0294806	0.862489
blue	ENSMUSG00000100201	NA	NA	NA	-0.276179	0.0979994	-0.140778	0.405928	-0.00741154	0.965274	-0.264703	0.113364	0.113051	0.505282	-0.0782323	0.645343	-0.103777	0.541043	0.266992	0.110163	0.278979	0.0945047	0.305514	0.0659405	-0.048936	0.773636	-0.296742	0.0745098	0.0856948	0.614051	0.249959	0.135685	0.183904	0.2759	0.13261	0.433971	-0.0609762	0.719964
blue	ENSMUSG00000074971	67606	Fibin	fin bud initiation factor homolog (zebrafish)	0.446605	0.00559024	0.334735	0.0428603	0.257075	0.124538	0.616171	4.9e-05	-0.326064	0.0488968	0.279302	0.0941066	0.245073	0.143752	-0.158842	0.347723	-0.494619	0.00185878	-0.51134	0.00121884	0.0366139	0.829657	-0.101445	0.550218	0.366491	0.0256793	0.3257	0.0491638	-0.209621	0.213057	0.0783714	0.644753	0.29582	0.0754578
blue	ENSMUSG00000024842	73660	Cabp4	calcium binding protein 4	0.517164	0.00104687	0.39527	0.0154637	0.319555	0.0538614	0.557716	0.000335465	-0.531644	0.000708736	0.425813	0.0085984	0.477986	0.00277112	-0.27956	0.0937912	-0.265545	0.112178	-0.32947	0.0464491	-0.344839	0.0366024	-0.15117	0.371795	0.132619	0.43394	0.16852	0.318746	-0.0323622	0.849195	0.165583	0.327376	-0.10867	0.522026
blue	ENSMUSG00000051998	240754	Lax1	lymphocyte transmembrane adaptor 1	0.158544	0.348641	0.188199	0.264645	0.115184	0.49723	0.293478	0.0779107	-0.298985	0.0722398	0.136378	0.420905	0.053497	0.753167	-0.00125919	0.994099	-0.159986	0.344216	0.307014	0.064556	0.149946	0.375722	0.0843382	0.619692	-0.264112	0.114202	-0.0633724	0.709429	0.555405	0.000359349	0.0530258	0.755275	-0.100973	0.552088
blue	ENSMUSG00000036062	230085	Phf24	PHD finger protein 24	0.241291	0.150237	0.185928	0.270557	0.330386	0.0458076	0.453003	0.00487029	-0.339449	0.0398409	0.0489565	0.773544	0.381788	0.0197153	-0.443647	0.00595293	-0.596131	9.89e-05	-0.448127	0.0054111	0.0348659	0.837678	0.147557	0.383464	0.397996	0.0147053	0.324992	0.0496879	-0.0571135	0.737053	-0.196911	0.242752	0.287062	0.0849488
blue	ENSMUSG00000105547	NA	NA	NA	0.400868	0.0139406	0.267394	0.109609	0.0554285	0.744548	0.333769	0.0435017	-0.329886	0.0461568	0.418512	0.00994097	0.434379	0.00722365	-0.444359	0.00586385	-0.196027	0.244917	-0.0566304	0.7392	-0.230419	0.170056	0.227568	0.17555	0.0126115	0.940944	0.184177	0.275176	0.102749	0.545079	-0.114316	0.500498	0.0336461	0.843286
blue	ENSMUSG00000058579	13706	Cela2a	chymotrypsin-like elastase family, member 2A	-0.444145	0.0058905	-0.231345	0.168299	-0.196532	0.243681	-0.357928	0.0296228	0.0613674	0.71824	-0.207292	0.218303	-0.0614828	0.717732	0.214368	0.202639	0.20065	0.233743	0.156995	0.35343	0.014114	0.933924	-0.0119539	0.944019	0.282597	0.09013	0.0806091	0.635307	0.0511129	0.763847	0.157088	0.353142	-0.00296323	0.986113
blue	ENSMUSG00000022025	16840	Cnmd	chondromodulin	0.437866	0.00672058	0.227026	0.176609	0.385004	0.0186217	0.821524	4.64e-10	-0.52408	0.000870794	-0.0855732	0.614556	0.261456	0.118025	-0.436024	0.00698253	-0.872462	1.99e-12	-0.411331	0.0114316	0.259553	0.120823	0.0747589	0.660119	0.0941303	0.579474	0.216314	0.198474	0.0712351	0.67524	-0.278132	0.0955511	0.196136	0.24465
blue	ENSMUSG00000084934	NA	NA	NA	0.222822	0.184975	0.0469169	0.782747	0.0003016	0.998586	0.442977	0.00603781	-0.0996609	0.55729	0.210898	0.210219	0.19464	0.248337	-0.164052	0.33193	-0.437326	0.00679648	-0.0819063	0.629857	0.0313977	0.853641	-0.124761	0.461898	-0.0585234	0.7308	-0.178271	0.291131	0.0442409	0.794866	0.00677693	0.968246	0.224964	0.180678
blue	ENSMUSG00000073422	14979	H2-Ke6	H2-K region expressed gene 6	0.424745	0.0087845	0.329528	0.0464082	0.281809	0.0910691	0.521365	0.000936525	-0.427983	0.00823055	0.235779	0.160062	0.0716411	0.673491	-0.00798161	0.962605	-0.399796	0.0142218	-0.119467	0.48126	0.198416	0.239099	-0.186408	0.269301	0.0592462	0.727602	0.383076	0.0192709	0.285911	0.0862623	-0.0924264	0.586387	-0.028941	0.864983
blue	ENSMUSG00000069456	19683	Rdh16	retinol dehydrogenase 16	0.731858	2.65e-07	0.545742	0.000476568	0.470665	0.00328328	0.909496	6.66e-15	-0.766783	3.13e-08	0.465428	0.00369842	0.492903	0.00193877	-0.509693	0.00127178	-0.620977	4.12e-05	-0.279864	0.093419	-0.0352136	0.836082	0.116971	0.490535	-0.078875	0.642623	0.166594	0.324387	0.266505	0.110838	-0.104275	0.539091	-0.0158758	0.925697
blue	ENSMUSG00000102553	NA	NA	NA	-0.0149236	0.930142	0.118678	0.484183	0.0599423	0.724525	-0.258655	0.122159	0.235223	0.16108	0.0101495	0.952459	-0.27227	0.103043	0.227258	0.176156	0.231965	0.167129	0.0214408	0.899766	0.156071	0.356304	0.0369828	0.827966	0.263031	0.115746	0.22581	0.179002	-0.102464	0.546199	-0.085729	0.613909	0.174033	0.302937
blue	ENSMUSG00000060034	244218	Ctf2	cardiotrophin 2	0.273563	0.101353	0.281333	0.0916401	0.203326	0.227434	0.342522	0.0379672	-0.295573	0.0757138	0.108383	0.523131	0.303468	0.0678664	-0.286185	0.0859485	-0.227604	0.175481	-0.314931	0.0576262	-0.0813992	0.631986	0.113607	0.503178	0.156557	0.354792	0.153726	0.363666	-0.0284012	0.867479	0.0641491	0.706025	0.0648258	0.703064
blue	ENSMUSG00000086328	NA	NA	NA	0.442245	0.00613179	0.224899	0.180807	0.19955	0.23637	0.243907	0.14573	-0.137197	0.418093	0.229208	0.172375	0.13709	0.418461	-0.170359	0.313416	0.0696626	0.682029	0.142206	0.401137	-0.158518	0.348719	0.0141314	0.933842	-0.180168	0.285941	0.111989	0.509317	0.139897	0.408904	0.0874455	0.606804	0.0238581	0.888532
blue	ENSMUSG00000087616	NA	NA	NA	0.345659	0.0361291	0.166066	0.325946	0.197674	0.240897	0.515472	0.00109447	-0.423071	0.0090833	0.212328	0.207072	0.229785	0.171268	-0.129858	0.443654	-0.417796	0.0100818	-0.366299	0.0257627	0.0433515	0.798904	-0.0955294	0.573825	0.214085	0.20325	0.297505	0.0737312	0.0670554	0.69334	0.0079385	0.962807	-0.137657	0.416519
blue	ENSMUSG00000001986	53623	Gria3	glutamate receptor, ionotropic, AMPA3 (alpha 3)	-0.354643	0.0312623	-0.182628	0.279304	-0.37916	0.0206485	-0.222423	0.185783	0.0849534	0.617131	-0.130775	0.440413	0.116641	0.491768	-0.0757644	0.655828	0.035405	0.835203	-0.210923	0.210164	-0.11449	0.499842	-0.117848	0.487264	0.382031	0.0196308	0.0116524	0.945429	-0.262252	0.116869	-0.133151	0.432082	0.254528	0.128446
blue	ENSMUSG00000032224	76886	Fam81a	family with sequence similarity 81, member A	-0.419163	0.00981442	-0.435435	0.007068	-0.53145	0.000712545	-0.533124	0.000680368	0.364158	0.0267078	0.0532521	0.754262	0.143007	0.39846	-0.0788304	0.642811	0.311124	0.0608812	0.101415	0.550339	-0.313728	0.0586399	0.0812601	0.63257	-0.0171202	0.919891	-0.413074	0.0110535	-0.265622	0.112071	0.00617206	0.971079	0.0712592	0.675137
blue	ENSMUSG00000071343	NA	NA	NA	0.421706	0.00933317	0.226033	0.178561	0.103682	0.541415	0.467788	0.00350598	-0.347103	0.0353075	0.338011	0.0407432	0.17715	0.294224	-0.135001	0.425653	-0.179505	0.287749	-0.151885	0.36951	-0.00136778	0.99359	0.0940115	0.579955	-0.0165161	0.922709	0.279599	0.0937434	0.117967	0.486824	-0.0182459	0.914642	-0.0521552	0.759172
blue	ENSMUSG00000114443	NA	NA	NA	0.309134	0.0626395	0.120608	0.477052	-0.0259657	0.878755	0.510751	0.00123754	-0.242619	0.147936	0.247465	0.13976	0.219939	0.190873	-0.362461	0.0274775	-0.39056	0.0168516	-0.033705	0.843015	0.042223	0.804036	0.333645	0.0435845	-0.150694	0.373319	-0.0959408	0.572168	0.0639069	0.707086	-0.212812	0.206015	0.0414098	0.807738
blue	ENSMUSG00000096926	NA	NA	NA	0.363319	0.0270859	0.373999	0.0225887	0.0993979	0.558336	0.31609	0.0566633	-0.267783	0.109073	0.245282	0.1434	0.236359	0.159008	-0.200216	0.234777	-0.247183	0.140226	-0.271102	0.104588	-0.00717353	0.966389	-0.014567	0.931808	0.175085	0.299978	0.145914	0.388841	-0.0583734	0.731465	-0.17143	0.310337	0.321218	0.0525562
blue	ENSMUSG00000091721	433653	Gimd1	GIMAP family P-loop NTPase domain containing 1	-0.344037	0.03707	-0.0646904	0.703656	-0.0898187	0.597038	-0.588026	0.000129608	0.222931	0.184754	-0.350714	0.0333197	-0.545884	0.00047462	0.362828	0.0273094	0.458125	0.00435321	0.317115	0.0558226	0.234316	0.162747	-0.0867554	0.609656	-0.114027	0.50159	-0.000761968	0.996429	-0.0243895	0.886065	-0.302849	0.0684576	-0.265198	0.112666
blue	ENSMUSG00000022074	21933	Tnfrsf10b	tumor necrosis factor receptor superfamily, member 10b	-0.316369	0.0564334	-0.240067	0.15238	-0.197884	0.240387	-0.411347	0.0114281	0.229276	0.172244	0.0184556	0.913665	-0.117247	0.489505	0.337222	0.0412448	0.443002	0.00603469	0.407011	0.0124167	-0.112284	0.508195	-0.217405	0.196164	-0.0582894	0.731837	0.198143	0.23976	0.124368	0.46332	0.217429	0.196113	-0.173025	0.30579
blue	ENSMUSG00000002489	21844	Tiam1	T cell lymphoma invasion and metastasis 1	0.0661531	0.69727	-0.0451788	0.790613	-0.0502617	0.767671	0.36665	0.0256102	-0.172351	0.307706	0.0121699	0.943009	0.130227	0.44235	-0.108505	0.52266	-0.315853	0.0568596	-0.224832	0.180942	-0.0899685	0.596424	-0.226788	0.177076	0.382139	0.0195933	0.287512	0.08444	-0.0337124	0.842981	-0.0236523	0.889488	-0.00216047	0.989875
blue	ENSMUSG00000108822	NA	NA	NA	0.0401706	0.813389	0.0838219	0.621844	0.143244	0.397671	-0.0945417	0.577811	-0.211982	0.20783	-0.0697969	0.681448	0.14042	0.407136	-0.16421	0.331459	-0.0415616	0.807047	0.185331	0.272125	-0.0336674	0.843188	0.0728484	0.668301	-0.210626	0.210823	-0.106631	0.52991	0.198657	0.238518	-0.0112773	0.947183	-0.183049	0.278177
blue	ENSMUSG00000038393	56338	Txnip	thioredoxin interacting protein	0.212667	0.206332	0.166639	0.324255	0.302861	0.0684459	0.423038	0.00908919	-0.271431	0.10415	0.0456519	0.78847	0.172356	0.307691	-0.128369	0.448941	-0.312168	0.0599741	-0.172669	0.306801	0.0332685	0.845023	-0.13958	0.409975	0.251981	0.132445	0.323133	0.0510846	0.0442459	0.794843	0.0913442	0.590798	0.11199	0.509311
blue	ENSMUSG00000048482	12064	Bdnf	brain derived neurotrophic factor	0.266747	0.110503	0.199835	0.235688	0.254677	0.128215	0.299181	0.0720442	-0.202827	0.228603	0.157209	0.352764	0.232486	0.16615	-0.216064	0.199004	-0.0149489	0.930024	-0.274241	0.100476	-0.364313	0.0266385	-0.155635	0.357668	0.133645	0.430358	0.0900286	0.596178	-0.202941	0.228336	0.0802366	0.636876	-0.285331	0.0869302
blue	ENSMUSG00000043719	245026	Col6a6	collagen, type VI, alpha 6	-0.592988	0.000109916	-0.412186	0.0112448	-0.2713	0.104325	-0.688361	2.49e-06	0.385333	0.0185124	-0.299	0.0722246	-0.355078	0.0310407	0.422429	0.00920015	0.402092	0.0136248	0.249804	0.135935	0.03923	0.817684	-0.290525	0.0810912	0.132441	0.434564	0.0544868	0.748746	-0.174405	0.301888	-0.0685457	0.686866	-0.023229	0.891454
blue	ENSMUSG00000033826	13417	Dnah8	dynein, axonemal, heavy chain 8	0.346023	0.0359204	0.24607	0.142079	0.311138	0.0608685	0.174947	0.300366	-0.0393077	0.817329	0.133913	0.429427	0.073526	0.665395	-0.0751992	0.658239	0.019746	0.907654	0.15674	0.35422	-0.0539697	0.751055	0.165209	0.328483	-0.219957	0.190834	0.00225876	0.989414	0.283732	0.0887913	0.0965502	0.569719	0.276185	0.0979912
blue	ENSMUSG00000023057	14079	Fabp2	fatty acid binding protein 2, intestinal	0.760329	4.77e-08	0.612117	5.67e-05	0.462218	0.00397483	0.854882	1.65e-11	-0.821021	4.86e-10	0.460775	0.00410486	0.56203	0.000294634	-0.579588	0.000170489	-0.587448	0.000132095	-0.268566	0.108003	-0.108404	0.523053	0.177255	0.293932	-0.124028	0.464552	0.129089	0.446381	0.275332	0.0990755	-0.13844	0.413847	-0.158941	0.347417
blue	ENSMUSG00000051008	NA	NA	NA	0.174173	0.302542	-0.0226285	0.894244	0.0859669	0.612922	0.335653	0.0422586	-0.0970938	0.567538	0.326267	0.0487475	0.377272	0.0213415	-0.276857	0.0971446	-0.176953	0.294771	-0.295387	0.0759069	-0.164336	0.331081	0.230117	0.170633	0.237227	0.157437	0.0990928	0.559551	-0.115999	0.494171	0.261442	0.118045	0.0319547	0.851073
blue	ENSMUSG00000102691	NA	NA	NA	0.420904	0.00948275	0.0332795	0.844972	0.249139	0.137015	0.575278	0.000195553	-0.313973	0.0584325	0.218417	0.194038	0.215329	0.200574	-0.260866	0.118887	-0.491205	0.00202084	-0.21519	0.200872	0.16323	0.334392	0.254919	0.127841	-0.128373	0.44893	0.22477	0.181064	0.181533	0.282247	-0.0411212	0.809053	-0.0698902	0.681045
blue	ENSMUSG00000112426	NA	NA	NA	-0.231207	0.168561	-0.0817067	0.630695	-0.0149527	0.930006	-0.436639	0.00689412	0.43409	0.00726681	0.150962	0.37246	-0.146041	0.388425	0.285661	0.0865489	0.473478	0.00307746	0.113118	0.505027	-0.186647	0.268676	-0.204494	0.22472	0.0541059	0.750447	0.0653401	0.700817	-0.170007	0.314432	0.161269	0.340311	-0.0602767	0.723049
blue	ENSMUSG00000085105	NA	NA	NA	-0.116182	0.493485	0.00491879	0.97695	-0.23357	0.164129	-0.140092	0.408245	0.0808879	0.634135	-0.0244331	0.885863	-0.0447039	0.792765	0.133959	0.429268	0.0618418	0.716152	0.196817	0.242983	0.0827614	0.626275	0.222704	0.185215	0.151658	0.370234	0.0186263	0.91287	0.155878	0.356908	0.0268037	0.874872	0.24021	0.152127
blue	ENSMUSG00000078519	NA	NA	NA	0.28225	0.0905423	0.221337	0.187997	0.316908	0.0559916	0.392068	0.0163964	-0.317231	0.0557282	0.0534013	0.753595	0.28682	0.0852237	-0.319185	0.0541549	-0.374387	0.0224377	-0.0281314	0.868727	-0.0543931	0.749165	0.0405587	0.811618	-0.125996	0.457439	-0.0357341	0.833692	0.166865	0.32359	0.00429494	0.979873	-0.134642	0.426896
blue	ENSMUSG00000110697	NA	NA	NA	-0.37408	0.0225569	-0.241406	0.150036	-0.374483	0.0224005	-0.592731	0.000110867	0.412421	0.0111939	0.00305067	0.985703	-0.0492348	0.77229	0.221653	0.18735	0.470363	0.003306	0.300722	0.0705199	-0.194603	0.24843	-0.087128	0.608115	-0.140322	0.407468	-0.351851	0.0327132	0.00143759	0.993262	0.254761	0.128086	-0.0171144	0.919918
blue	ENSMUSG00000052957	14451	Gas1	growth arrest specific 1	0.657967	9.62e-06	0.517256	0.00104434	0.436623	0.00689635	0.727631	3.35e-07	-0.682004	3.35e-06	0.427046	0.00838776	0.651202	1.27e-05	-0.506532	0.00137909	-0.449592	0.00524344	-0.453248	0.00484442	-0.352142	0.0325596	-0.0378018	0.824215	0.216467	0.198147	0.281633	0.0912796	0.0366806	0.829351	0.134891	0.426036	-0.0019644	0.990794
blue	ENSMUSG00000105987	433855	AI506816	expressed sequence AI506816	-0.638931	2.08e-05	-0.361996	0.0276915	-0.501972	0.00154801	-0.810943	1.16e-09	0.527959	0.000784009	-0.244871	0.144094	-0.457482	0.00441538	0.580321	0.000166526	0.66339	7.64e-06	0.217961	0.194993	0.0694542	0.682931	-0.214919	0.201454	0.179925	0.286602	-8.64e-05	0.999595	-0.158052	0.350157	0.170432	0.313206	-0.107417	0.526863
blue	ENSMUSG00000108659	NA	NA	NA	-0.22945	0.171909	0.0735811	0.665159	-0.227148	0.176371	-0.311288	0.0607381	0.0568606	0.738177	-0.0506136	0.766089	-0.112859	0.506012	0.324294	0.0502083	0.16071	0.342009	0.138468	0.413752	0.0937584	0.58098	-0.139485	0.4103	0.252844	0.13108	0.117005	0.490407	0.169844	0.314904	0.0984438	0.562138	0.233052	0.165092
blue	ENSMUSG00000043807	266614	Ly6g5b	lymphocyte antigen 6 complex, locus G5B	0.120386	0.477869	-0.0826257	0.626843	0.107414	0.526874	0.116116	0.493733	-0.061018	0.71978	-0.182357	0.28003	-0.0702662	0.67942	0.0116972	0.945219	-0.127846	0.450807	0.026411	0.876691	0.143289	0.397522	0.0802659	0.636753	-0.0923119	0.586853	0.0982548	0.562893	-0.0432089	0.799552	-0.014469	0.932265	-0.0486537	0.774908
blue	ENSMUSG00000005705	11604	Agrp	agouti related neuropeptide	-0.00181493	0.991494	0.081577	0.631239	-0.0893579	0.598929	-0.038693	0.820138	-0.0699914	0.680608	0.190938	0.257626	0.0105523	0.950574	0.135293	0.424645	0.122188	0.471256	0.0329459	0.846508	-0.0440211	0.795863	-0.162848	0.335539	0.225221	0.180168	0.165324	0.328144	0.0984677	0.562043	0.038241	0.822206	-0.0934185	0.582358
blue	ENSMUSG00000020865	76408	Abcc3	ATP-binding cassette, sub-family C (CFTR/MRP), member 3	0.702523	1.25e-06	0.458691	0.00429912	0.353204	0.0320034	0.860027	9.13e-12	-0.569382	0.000235197	0.526763	0.000809916	0.412873	0.0110966	-0.319691	0.0537538	-0.384573	0.018765	-0.332864	0.0441091	-0.115536	0.495909	0.154814	0.36024	-0.0300921	0.859665	0.203969	0.225937	0.213769	0.203934	0.211705	0.20844	-0.0813109	0.632357
blue	ENSMUSG00000097039	19296	Pvt1	Pvt1 oncogene	-0.105293	0.535114	-0.0554431	0.744483	-0.318592	0.0546286	-0.335643	0.042265	0.295132	0.0761725	0.420606	0.00953875	0.101959	0.548192	0.0944149	0.578323	0.444891	0.00579795	0.214877	0.201544	-0.218534	0.193794	0.135764	0.423019	0.00278585	0.986944	-0.158563	0.348582	-0.0166104	0.922269	0.221527	0.187608	0.0999959	0.555959
blue	ENSMUSG00000044505	320747	Lingo4	leucine rich repeat and Ig domain containing 4	0.546748	0.000462946	0.327362	0.0479518	0.322467	0.0515926	0.809799	1.28e-09	-0.588325	0.000128338	0.121394	0.474163	0.362631	0.0273995	-0.440262	0.00639271	-0.863024	6.41e-12	-0.533751	0.000668653	0.209802	0.212655	0.0681222	0.688704	0.206265	0.220642	0.319698	0.053748	-0.0136263	0.936202	-0.268826	0.107648	0.174275	0.302256
blue	ENSMUSG00000109931	NA	NA	NA	-0.00552366	0.974116	-0.0326235	0.847992	-0.0457342	0.788097	0.191228	0.256889	-0.135975	0.42229	0.278543	0.0950423	0.109437	0.519076	0.0333276	0.844751	-0.231653	0.167718	-0.146424	0.387165	0.110517	0.514932	-0.0273929	0.872144	0.0846094	0.618562	0.136303	0.421161	0.0716715	0.67336	0.0239441	0.888133	0.0711111	0.675775
blue	ENSMUSG00000104676	NA	NA	NA	0.334042	0.0433198	0.236453	0.158838	0.24999	0.135634	0.604325	7.47e-05	-0.327075	0.0481592	0.451645	0.00501598	0.426079	0.00855262	-0.361344	0.0279939	-0.399581	0.014279	-0.252686	0.131328	-0.139922	0.40882	0.0680912	0.688838	0.056555	0.739535	0.158025	0.35024	0.134777	0.42643	0.0826814	0.62661	0.0251033	0.882754
blue	ENSMUSG00000097636	NA	NA	NA	0.103775	0.541051	0.0698273	0.681317	-0.0163189	0.923629	0.275643	0.0986794	-0.298814	0.0724106	0.0054292	0.974559	0.209359	0.213643	-0.217887	0.19515	-0.175899	0.297702	0.179335	0.288212	-0.138121	0.414934	-0.196162	0.244586	0.175404	0.299085	0.136695	0.419814	0.220601	0.189507	-0.111901	0.509653	-0.0352911	0.835726
blue	ENSMUSG00000041440	235533	Gk5	glycerol kinase 5 (putative)	0.258778	0.121976	0.162627	0.336204	0.233798	0.163706	0.328876	0.0468685	-0.270863	0.104906	-0.120222	0.478475	0.0850963	0.616537	-0.181095	0.283428	-0.330282	0.0458804	-0.377361	0.0213085	0.10988	0.517374	0.0580311	0.732982	0.357152	0.0300034	0.363386	0.0270556	-0.121775	0.472768	-0.183527	0.276903	0.222905	0.184807
blue	ENSMUSG00000042622	17133	Maff	v-maf musculoaponeurotic fibrosarcoma oncogene family, protein F (avian)	0.378464	0.0209019	0.268576	0.107989	0.211796	0.208239	0.640238	1.98e-05	-0.455847	0.00457705	0.251415	0.133345	0.360487	0.0283952	-0.22492	0.180767	-0.343886	0.0371585	-0.329969	0.0460988	-0.160243	0.343432	-0.166235	0.325447	0.171309	0.310686	0.319566	0.0538524	0.00877086	0.958911	0.167275	0.322387	-0.154922	0.359901
blue	ENSMUSG00000027762	84112	Sucnr1	succinate receptor 1	0.718478	5.51e-07	0.440771	0.00632491	0.359394	0.0289143	0.844946	4.83e-11	-0.616179	4.9e-05	0.433537	0.00734982	0.669425	5.89e-06	-0.75631	6.16e-08	-0.531146	0.000718522	-0.306056	0.0654377	-0.303611	0.0677298	0.278866	0.0946434	-0.169818	0.314978	-0.10771	0.525728	0.156705	0.354331	-0.0269914	0.874003	-0.102872	0.544594
blue	ENSMUSG00000111923	NA	NA	NA	0.215859	0.199442	0.210708	0.210641	-0.0502216	0.767851	0.409844	0.0117629	-0.395841	0.015302	-0.0839771	0.621197	0.200782	0.233429	-0.157721	0.351179	-0.481813	0.00253227	-0.321575	0.0522794	0.034313	0.840219	-0.282799	0.0898902	0.328282	0.0472911	-0.0387956	0.819669	-0.231863	0.167322	-0.0708261	0.677004	0.302908	0.068401
blue	ENSMUSG00000027876	67709	Reg4	regenerating islet-derived family, member 4	0.497065	0.00174981	0.286125	0.0860163	0.306646	0.0648935	0.426455	0.00848821	-0.351719	0.0327834	0.555133	0.000362259	0.528596	0.000770499	-0.447654	0.00546627	-0.361897	0.0277369	-0.263675	0.114825	-0.227494	0.175696	0.214752	0.201813	-0.0650856	0.701929	-0.137763	0.416159	0.0481452	0.777201	0.012902	0.939587	0.0918772	0.588624
blue	ENSMUSG00000093629	NA	NA	NA	0.316791	0.0560875	0.0725024	0.669787	0.212097	0.207578	0.382518	0.0194626	-0.26209	0.117103	0.254714	0.128158	0.435296	0.00708838	-0.43079	0.00777473	-0.298331	0.0728959	-0.417685	0.0101038	-0.229164	0.17246	0.142604	0.399804	-0.00136082	0.993622	-0.00609129	0.971457	-0.253049	0.130757	-0.0394929	0.816483	0.0504795	0.766692
blue	ENSMUSG00000110456	NA	NA	NA	-0.0338643	0.842282	-0.00952351	0.955388	0.359377	0.0289225	0.0755475	0.656752	0.0204899	0.90419	-0.147506	0.38363	0.0476502	0.779435	-0.158819	0.347792	0.0532729	0.754169	0.133103	0.432248	-0.185739	0.271053	-0.176981	0.294692	-0.0946166	0.577508	-0.00851649	0.960101	0.165927	0.326357	-0.0512365	0.763292	-0.104511	0.538169
blue	ENSMUSG00000056035	13112	Cyp3a11	cytochrome P450, family 3, subfamily a, polypeptide 11	0.467042	0.00356587	0.358399	0.0293938	0.134183	0.428488	0.651734	1.25e-05	-0.430339	0.00784656	0.42121	0.00942536	0.254429	0.128601	-0.291934	0.0795619	-0.241403	0.150041	-0.107075	0.528189	-0.0112671	0.947231	0.22645	0.17774	-0.1192	0.48225	0.114709	0.499018	0.156886	0.353768	-0.0127152	0.94046	-0.146724	0.386183
blue	ENSMUSG00000107509	NA	NA	NA	-0.173554	0.30429	-0.297155	0.0740873	-0.20342	0.227217	-0.203217	0.227691	0.153556	0.364204	-0.141521	0.40343	-0.213564	0.20438	0.239973	0.152545	0.00843133	0.9605	-0.176435	0.296207	0.240653	0.15135	0.0318698	0.851464	0.12595	0.457607	0.0896327	0.597801	-0.291437	0.0800993	-0.0694561	0.682923	0.281885	0.0909788
blue	ENSMUSG00000024427	24066	Spry4	sprouty RTK signaling antagonist 4	0.389578	0.0171538	0.152571	0.367326	0.365109	0.0262846	0.597473	9.45e-05	-0.217085	0.196839	0.0694972	0.682745	0.245031	0.143824	-0.272501	0.102739	-0.505848	0.00140335	-0.175571	0.298617	-0.0266894	0.875402	-0.0525891	0.757229	-0.0460806	0.786529	0.0968585	0.568481	0.0922374	0.587157	0.0684618	0.68723	0.0640801	0.706327
blue	ENSMUSG00000101356	NA	NA	NA	-0.398894	0.0144624	-0.419651	0.00972058	-0.213776	0.20392	-0.469525	0.00337	0.425652	0.00862621	-0.478581	0.00273274	-0.276102	0.0980963	0.190131	0.259681	0.391419	0.0165909	0.268176	0.108534	-0.142246	0.401003	-0.320903	0.0528016	0.0134015	0.937252	-0.182959	0.278418	-0.151719	0.370039	-0.0311702	0.85469	0.0382462	0.822182
blue	ENSMUSG00000049872	103511	Calhm5	calcium homeostasis modulator family member 5	-0.205429	0.222561	-0.0539893	0.750967	0.164733	0.329899	-0.310197	0.0616953	0.0855443	0.614676	-0.258432	0.122493	-0.184949	0.273134	0.161938	0.338285	0.127964	0.450385	0.200481	0.234144	0.169743	0.315195	-0.00703291	0.967047	0.190291	0.259273	0.430592	0.00780624	0.0475112	0.780062	-0.150447	0.374113	0.167346	0.322177
blue	ENSMUSG00000003051	13710	Elf3	E74-like factor 3	-0.455187	0.00464371	-0.184484	0.274362	-0.307334	0.0642641	-0.478541	0.0027353	0.346997	0.0353671	-0.177917	0.292105	-0.408569	0.0120535	0.58292	0.000153133	0.585218	0.000142108	0.238163	0.155758	0.0411308	0.80901	-0.224163	0.182277	0.268164	0.108551	0.456604	0.00450155	0.0730036	0.667635	0.212256	0.20723	-0.17226	0.307966
blue	ENSMUSG00000087143	NA	NA	NA	0.4196	0.00973019	0.263335	0.11531	0.511608	0.0012104	0.478698	0.00272525	-0.387632	0.0177657	0.240653	0.151351	0.14853	0.380301	-0.173459	0.304559	-0.294121	0.0772317	-0.204135	0.225552	0.0433486	0.798917	-0.00122762	0.994246	-0.0892014	0.599572	0.202211	0.23005	0.0833753	0.623709	-0.0859399	0.613034	-0.281203	0.0917964
blue	ENSMUSG00000038463	320078	Olfml2b	olfactomedin-like 2B	-0.171081	0.311339	-0.266007	0.111533	0.09837	0.562433	-0.392402	0.0162968	0.293958	0.0774038	-0.0112871	0.947137	-0.131666	0.43728	0.0979506	0.564108	0.439725	0.00646494	0.423356	0.00903171	-0.170323	0.313521	0.0866433	0.61012	-0.311588	0.0604771	-0.0205236	0.904033	0.0978284	0.564597	0.109584	0.518511	-0.23055	0.169807
blue	ENSMUSG00000031613	15446	Hpgd	hydroxyprostaglandin dehydrogenase 15 (NAD)	0.731991	2.63e-07	0.463637	0.00385053	0.51748	0.00103819	0.937615	1.24e-17	-0.723228	4.27e-07	0.363632	0.0269442	0.575055	0.000196937	-0.671912	5.28e-06	-0.722839	4.36e-07	-0.248342	0.138316	-0.123146	0.46776	0.144488	0.393541	-0.15768	0.351306	0.0400899	0.813757	0.251968	0.132466	-0.166498	0.324671	-0.0427768	0.801516
blue	ENSMUSG00000078967	NA	NA	NA	0.30229	0.0689948	-0.0748838	0.659585	0.138076	0.41509	0.189689	0.260812	-0.0772433	0.649536	0.0967024	0.569108	0.0632345	0.710033	-0.0793627	0.640562	-0.0984664	0.562048	-0.0708233	0.677016	0.0322323	0.849794	0.0812907	0.632442	-0.0804384	0.636026	0.158766	0.347955	-0.0351049	0.836581	-0.00325124	0.984763	0.110332	0.515642
blue	ENSMUSG00000039410	70673	Prdm16	PR domain containing 16	-0.420378	0.00958202	-0.0897707	0.597235	-0.242762	0.14769	-0.475025	0.00296916	0.386157	0.0182421	-0.0718206	0.672719	-0.347497	0.035086	0.413344	0.0109958	0.499613	0.00164231	0.336512	0.0417013	0.0626448	0.712622	-0.127926	0.450523	0.230572	0.169764	0.378589	0.0208562	0.030963	0.855646	0.0269825	0.874044	-0.0283562	0.867687
blue	ENSMUSG00000040026	20210	Saa3	serum amyloid A 3	-0.624671	3.59e-05	-0.394726	0.0156189	-0.211404	0.209101	-0.870918	2.42e-12	0.576149	0.000190234	-0.3621	0.0276432	-0.433181	0.00740378	0.428829	0.00809093	0.599515	8.81e-05	0.443713	0.00594465	-0.0316322	0.85256	-0.21425	0.202894	-0.108274	0.523552	-0.264657	0.113429	-0.0858457	0.613425	-0.0514403	0.762378	-0.0577397	0.734274
blue	ENSMUSG00000038179	75345	Slamf7	SLAM family member 7	0.164224	0.331417	0.268077	0.10867	0.165189	0.328543	0.29596	0.0753139	-0.286166	0.0859704	0.0625625	0.712984	0.0221908	0.896278	0.0224451	0.895096	-0.182161	0.280556	0.244767	0.14427	0.233822	0.163662	0.17773	0.29262	-0.0907247	0.593328	0.369959	0.0242107	0.53195	0.000702792	0.021545	0.899281	-0.0350161	0.836989
blue	ENSMUSG00000005540	14128	Fcer2a	Fc receptor, IgE, low affinity II, alpha polypeptide	0.225455	0.179704	0.443775	0.00593678	-0.00663288	0.968921	0.392315	0.0163225	-0.36511	0.0262841	0.339134	0.0400372	0.327741	0.0476786	-0.24341	0.146578	-0.136766	0.419573	0.253955	0.129338	-0.18959	0.261065	0.0172523	0.919275	-0.204087	0.225663	0.053132	0.754799	0.487301	0.00222124	-0.00550226	0.974217	-0.134145	0.42862
blue	ENSMUSG00000051439	12475	Cd14	CD14 antigen	-0.531842	0.000704891	-0.454755	0.00468772	-0.142321	0.40075	-0.631576	2.77e-05	0.58479	0.000144107	-0.28638	0.0857248	-0.50821	0.00132118	0.534656	0.00065207	0.616933	4.77e-05	0.606997	6.8e-05	0.118958	0.483146	-0.0328442	0.846976	-0.0786646	0.643513	0.165901	0.326434	0.159824	0.344713	0.162552	0.336432	-0.0716189	0.673587
blue	ENSMUSG00000024673	12482	Ms4a1	membrane-spanning 4-domains, subfamily A, member 1	0.426411	0.00849562	0.386256	0.0182097	0.156873	0.353809	0.516859	0.00105531	-0.478815	0.00271777	0.0191408	0.910472	0.301231	0.0700221	-0.412635	0.0111476	-0.431547	0.00765568	-0.0948713	0.576479	0.0567525	0.738657	0.347452	0.0351111	0.018258	0.914586	0.0425026	0.802763	0.269757	0.106388	-0.115929	0.494433	0.081546	0.631369
blue	ENSMUSG00000116551	NA	NA	NA	0.398307	0.0146209	0.338956	0.0401483	0.225324	0.179964	0.490208	0.00207045	-0.276549	0.0975316	0.355444	0.0308555	0.483785	0.00241639	-0.478769	0.00272067	-0.407114	0.0123923	-0.0915991	0.589757	-0.232248	0.166598	-0.00684269	0.967938	0.0913035	0.590963	0.105469	0.534428	0.114495	0.499824	-0.161898	0.338404	0.289047	0.0827209
blue	ENSMUSG00000108137	NA	NA	NA	0.143784	0.395876	0.0903712	0.594775	0.189293	0.261827	0.284504	0.0878882	-0.272541	0.102687	-0.0319679	0.851012	0.181378	0.282663	-0.1876	0.266194	-0.363841	0.0268503	-0.373156	0.0229194	0.145753	0.38937	0.196153	0.244608	0.164971	0.329191	0.198605	0.238642	-0.145488	0.390242	-0.0794069	0.640375	0.204249	0.225286
blue	ENSMUSG00000025002	72082	Cyp2c55	cytochrome P450, family 2, subfamily c, polypeptide 55	0.508255	0.00131967	0.371518	0.0235737	0.429721	0.00794582	0.574529	0.00020023	-0.360617	0.0283342	0.434528	0.00720159	0.375379	0.0220554	-0.503352	0.00149505	-0.203486	0.227063	0.066778	0.694547	-0.202855	0.228537	0.229055	0.172669	-0.361669	0.0278426	0.0140046	0.934434	0.29012	0.0815357	-0.0278786	0.869896	-0.250897	0.134174
blue	ENSMUSG00000020227	73914	Irak3	interleukin-1 receptor-associated kinase 3	-0.609421	6.24e-05	-0.457217	0.00444122	-0.312292	0.0598673	-0.744264	1.29e-07	0.531218	0.000717108	-0.311529	0.0605277	-0.46283	0.0039208	0.47215	0.00317318	0.673567	4.9e-06	0.543678	0.000505636	0.0476962	0.779227	-0.0130709	0.938797	-0.0815787	0.631232	-0.101437	0.550252	0.0374495	0.825828	0.0665685	0.695459	-0.0260596	0.87832
blue	ENSMUSG00000032816	56741	Igdcc4	immunoglobulin superfamily, DCC subclass, member 4	-0.314672	0.0578434	-0.0308406	0.856211	-0.260366	0.119621	-0.314766	0.0577647	0.0733541	0.666131	-0.168521	0.318744	-0.170518	0.312957	0.275858	0.0984059	0.0274326	0.87196	-0.0343836	0.839894	0.181947	0.281131	-0.266585	0.110728	0.450408	0.00515197	0.389299	0.0172403	-0.242493	0.148153	-0.121573	0.473507	0.18421	0.275088
blue	ENSMUSG00000017716	11799	Birc5	baculoviral IAP repeat-containing 5	0.207331	0.218213	0.134449	0.427566	0.204718	0.224201	0.378141	0.0210202	-0.243186	0.146962	0.245931	0.142311	0.509483	0.00127868	-0.434544	0.00719922	-0.407019	0.0124149	-0.183245	0.277655	-0.322684	0.0514266	-0.334695	0.0428868	0.204672	0.224308	0.0927747	0.584971	-0.0195382	0.908621	-0.0760282	0.654704	0.156013	0.356487
blue	ENSMUSG00000020639	382562	Pfn4	profilin family, member 4	-0.169986	0.314492	-0.167761	0.320962	0.0216782	0.898662	-0.331487	0.0450468	0.329539	0.0464002	0.130558	0.44118	-0.0377956	0.824244	-0.1346	0.427042	0.247446	0.139791	0.0711885	0.675441	-0.0138826	0.935005	0.355673	0.0307404	-0.27424	0.100477	-0.359026	0.0290909	-0.198621	0.238603	-0.164222	0.331422	0.021081	0.901439
blue	ENSMUSG00000070368	246691	Prok1	prokineticin 1	-0.377501	0.0212565	-0.377174	0.021378	-0.223066	0.184483	-0.287171	0.0848251	0.26993	0.106155	-0.160625	0.342268	-0.273643	0.10125	0.251925	0.132533	0.0115874	0.945733	0.379245	0.0206177	0.242646	0.147889	-0.0819386	0.629722	-0.0451148	0.790902	-0.14601	0.388525	0.216027	0.199084	-0.126792	0.454582	0.170048	0.314314
blue	ENSMUSG00000067377	56496	Tspan6	tetraspanin 6	0.194986	0.247483	0.223919	0.182766	0.0883174	0.603208	0.342911	0.0377348	-0.288645	0.0831682	0.182958	0.278421	0.102173	0.547348	0.0349815	0.837147	-0.316376	0.056428	-0.125117	0.460608	0.0891997	0.599579	-0.184184	0.275157	0.29732	0.0739192	0.468137	0.00347832	0.082191	0.628664	-0.0649164	0.702668	0.0773253	0.649189
blue	ENSMUSG00000025473	11501	Adam8	a disintegrin and metallopeptidase domain 8	-0.245938	0.1423	-0.00705284	0.966954	0.0298945	0.860578	-0.393949	0.0158429	0.152816	0.366548	-0.133127	0.432167	-0.381114	0.0199512	0.551652	0.00040141	0.356229	0.0304617	0.227523	0.175639	0.283543	0.0890122	-0.00721895	0.966176	0.0154548	0.927662	0.325987	0.0489526	0.247671	0.139421	0.233298	0.164634	-0.242397	0.148318
blue	ENSMUSG00000005674	641376	Tomm40l	translocase of outer mitochondrial membrane 40-like	0.24487	0.144096	0.259418	0.121023	0.0253468	0.881624	0.433366	0.00737577	-0.358276	0.0294533	0.365839	0.0259635	0.385674	0.0184001	-0.089362	0.598912	-0.381643	0.0197659	-0.304366	0.067016	-0.19351	0.25115	-0.585643	0.000140149	0.381265	0.0198981	0.226587	0.177471	-0.0718386	0.672641	0.118005	0.486681	0.0967188	0.569042
blue	ENSMUSG00000064267	74096	Hvcn1	hydrogen voltage-gated channel 1	0.101828	0.548708	0.0345005	0.839357	-0.0920805	0.587795	0.324437	0.0501016	-0.0315847	0.852778	0.114833	0.498553	0.269596	0.106605	-0.339438	0.0398477	-0.193099	0.252178	0.0877186	0.605676	-0.206167	0.220867	0.143356	0.397299	-0.0483655	0.776207	0.000955184	0.995523	0.194109	0.249657	-0.0199049	0.906913	0.00337269	0.984194
blue	ENSMUSG00000015568	16956	Lpl	lipoprotein lipase	-0.605298	7.22e-05	-0.385633	0.0184136	-0.582057	0.000157468	-0.678645	3.9e-06	0.486419	0.00226884	-0.238438	0.155266	-0.411536	0.0113865	0.420917	0.00948033	0.586492	0.000136308	0.505483	0.00141644	0.105979	0.532442	0.0207902	0.902793	-0.117741	0.487665	-0.103117	0.543631	0.00455545	0.978652	-0.0105422	0.950621	0.0131039	0.938643
blue	ENSMUSG00000026205	22626	Slc23a3	solute carrier family 23 (nucleobase transporters), member 3	0.182281	0.280233	0.1195	0.48114	-0.00734277	0.965596	0.28032	0.0928648	-0.15691	0.353692	0.198956	0.237796	0.263136	0.115595	-0.179575	0.287556	-0.313308	0.0589968	-0.166568	0.324465	0.0741955	0.662528	0.224619	0.181366	0.310736	0.0612212	0.362203	0.0275958	0.133143	0.432111	0.00491105	0.976986	0.305814	0.0656622
blue	ENSMUSG00000022658	56370	Tagln3	transgelin 3	0.163123	0.334713	0.101111	0.551539	0.220172	0.19039	0.264624	0.113476	-0.206278	0.220614	-0.0548277	0.747226	-0.0399704	0.814303	0.0203652	0.904771	-0.291531	0.0799968	-0.304309	0.0670696	0.305801	0.0656741	0.191967	0.255022	0.186723	0.268478	0.402322	0.0135663	0.0738599	0.663964	-0.0644223	0.704829	0.0608494	0.720523
blue	ENSMUSG00000116305	NA	NA	NA	-0.0317363	0.85208	-0.0273796	0.872206	-0.19394	0.250076	0.119928	0.479559	-0.0726774	0.669036	-0.00134778	0.993683	-0.0800509	0.637659	0.247109	0.14035	-0.0622869	0.714195	-0.219417	0.191955	0.0892822	0.59924	-0.194311	0.249155	0.26184	0.117466	0.15288	0.366343	-0.179283	0.288355	0.12718	0.453188	-0.116008	0.494139
blue	ENSMUSG00000053198	19153	Prx	periaxin	-0.0245769	0.885196	0.0280244	0.869222	-0.11059	0.514656	0.137597	0.416726	-0.131514	0.437815	-0.286205	0.0859249	-0.207635	0.217525	0.144118	0.394768	-0.162747	0.335842	-0.294842	0.0764756	0.226325	0.177986	-0.163198	0.334487	0.158792	0.347876	0.350713	0.0333201	-0.0939784	0.580089	-0.0495989	0.770651	-0.106761	0.529404
blue	ENSMUSG00000005547	13087	Cyp2a5	cytochrome P450, family 2, subfamily a, polypeptide 5	0.598533	9.11e-05	0.282532	0.090208	0.450969	0.00508991	0.776874	1.58e-08	-0.497546	0.00172907	0.425026	0.00873529	0.555696	0.000356261	-0.592081	0.000113302	-0.723122	4.3e-07	-0.378349	0.0209437	-0.100332	0.554625	0.135354	0.424433	-0.130634	0.440912	-0.0275558	0.87139	0.0634426	0.709121	-0.120224	0.478466	0.104443	0.538435
blue	ENSMUSG00000037217	20964	Syn1	synapsin I	-0.449807	0.00521922	-0.52551	0.000837858	-0.108513	0.522632	-0.444925	0.00579387	0.442068	0.00615478	-0.33414	0.0432544	-0.466913	0.00357632	0.427597	0.00829499	0.2646	0.113509	0.454316	0.0047329	0.208711	0.215098	-0.300667	0.0705737	-0.156801	0.354032	0.066487	0.695814	0.029468	0.862548	-0.135424	0.424192	-0.0558938	0.742476
blue	ENSMUSG00000041293	77596	Adgrf1	adhesion G protein-coupled receptor F1	-0.597558	9.42e-05	-0.474161	0.0030292	-0.515657	0.00108917	-0.403159	0.0133547	0.386264	0.0182071	-0.533112	0.000680591	-0.361136	0.0280907	0.330814	0.0455106	0.25361	0.129878	0.272056	0.103324	0.135205	0.42495	-0.088283	0.60335	0.00241428	0.988685	-0.170073	0.314242	0.0554041	0.744657	0.0651064	0.701838	0.0034643	0.983765
blue	ENSMUSG00000041538	15002	H2-Ob	histocompatibility 2, O region beta locus	0.171942	0.308873	0.314355	0.0581099	0.171638	0.309742	0.429343	0.00800701	-0.342908	0.0377367	0.0729612	0.667817	0.108402	0.523057	-0.110197	0.51616	-0.319252	0.0541017	0.353551	0.0318235	0.172373	0.307643	0.12635	0.456167	-0.144793	0.392533	0.121718	0.472977	0.684038	3.05e-06	-0.0983845	0.562375	0.131262	0.438701
blue	ENSMUSG00000039286	72007	Fndc3b	fibronectin type III domain containing 3B	-0.667718	6.34e-06	-0.395813	0.0153099	-0.424147	0.00889025	-0.904572	1.62e-14	0.579871	0.000168952	-0.338432	0.0404771	-0.5318	0.000705708	0.548969	0.000434108	0.621665	4.01e-05	0.210463	0.211183	0.175352	0.299229	-0.0571273	0.736992	0.135504	0.423916	-0.0562022	0.741104	-0.278172	0.095501	-0.0302836	0.858781	0.128814	0.44736
blue	ENSMUSG00000031698	213435	Mylk3	myosin light chain kinase 3	0.314821	0.0577187	0.0553294	0.744989	0.119362	0.481648	0.341691	0.0384664	-0.0545217	0.748591	0.0879052	0.604907	0.00728297	0.965876	-0.13421	0.428396	-0.166587	0.324409	-0.0582254	0.732121	0.00437933	0.979477	0.0855584	0.614617	-0.0701472	0.679934	0.0366011	0.829715	0.0870209	0.608558	-0.0531412	0.754758	-0.00816257	0.961758
blue	ENSMUSG00000045934	194126	Mtmr11	myotubularin related protein 11	-0.285388	0.0868639	0.0245585	0.885281	-0.232234	0.166624	-0.43432	0.00723245	0.181715	0.281755	-0.268645	0.107894	-0.402303	0.0135711	0.483753	0.00241822	0.435663	0.0070348	-0.124182	0.463996	0.240366	0.151854	0.0320161	0.85079	0.386169	0.0182382	0.401729	0.0137177	-0.270055	0.105988	0.160672	0.342123	0.00844459	0.960438
blue	ENSMUSG00000034906	215387	Ncaph	non-SMC condensin I complex, subunit H	-0.267413	0.109582	-0.21048	0.211147	-0.10802	0.524534	-0.497094	0.00174856	0.500605	0.00160206	-0.0963401	0.570563	-0.345797	0.0360495	0.273511	0.101421	0.562308	0.000292163	0.424809	0.00877337	0.0237294	0.88913	0.082143	0.628865	-0.259846	0.120388	0.0231857	0.891655	0.0594273	0.726801	0.0781752	0.645585	-0.0246129	0.885028
blue	ENSMUSG00000108435	NA	NA	NA	0.42382	0.00894853	0.159796	0.344796	0.23295	0.165283	0.66814	6.23e-06	-0.416967	0.0102468	0.18467	0.273871	0.510392	0.00124906	-0.516373	0.00106888	-0.737011	1.97e-07	-0.35512	0.0310198	-0.0514802	0.762199	0.0456165	0.78863	-0.0651925	0.701462	0.0158635	0.925754	0.0579224	0.733464	-0.0701238	0.680035	0.213347	0.20485
blue	ENSMUSG00000097835	NA	NA	NA	-0.123121	0.467852	-0.0869998	0.608645	-0.249166	0.136971	-0.12635	0.456166	0.0796751	0.639243	0.0470271	0.782249	0.0637327	0.707849	-0.0274204	0.872017	0.107919	0.524921	0.17668	0.295528	-0.00746466	0.965026	0.164415	0.330845	-0.0726518	0.669145	-0.0294119	0.862807	-0.01983	0.907262	-0.0349715	0.837193	-0.00452512	0.978794
blue	ENSMUSG00000020102	20503	Slc16a7	solute carrier family 16 (monocarboxylic acid transporters), member 7	0.674569	4.69e-06	0.521733	0.000927368	0.413983	0.0108604	0.890451	1.61e-13	-0.815649	7.79e-10	0.279335	0.0940666	0.486353	0.00227244	-0.55152	0.000402956	-0.795625	3.99e-09	-0.430633	0.00779976	0.0653133	0.700934	0.0719842	0.672015	0.114166	0.501067	0.262558	0.116427	0.107927	0.524891	-0.277837	0.0959183	0.0824067	0.62776
blue	ENSMUSG00000103553	NA	NA	NA	0.312575	0.0596241	0.183068	0.278128	0.171348	0.310574	0.471819	0.00319739	-0.236247	0.159211	0.385695	0.0183932	0.325823	0.0490732	-0.269425	0.106836	-0.25331	0.130347	-0.18913	0.262245	-0.136629	0.420041	0.0712389	0.675224	-0.0289958	0.86473	0.157058	0.353232	0.0484183	0.77597	0.0658208	0.698719	0.0161488	0.924423
blue	ENSMUSG00000023873	66931	1700010I14Rik	RIKEN cDNA 1700010I14 gene	-0.519328	0.000988658	-0.380467	0.02018	-0.380069	0.0203218	-0.632341	2.69e-05	0.554958	0.000364142	-0.390797	0.0167793	-0.387098	0.0179369	0.346428	0.0356896	0.316497	0.0563288	0.300342	0.0708928	0.147659	0.38313	0.0187156	0.912453	0.116688	0.491592	0.0533337	0.753897	-0.0819696	0.629592	-0.0934946	0.582049	0.231343	0.168303
blue	ENSMUSG00000038775	22351	Vill	villin-like	-0.411601	0.0113724	-0.094258	0.578958	0.0177265	0.917064	-0.429751	0.00794085	0.254306	0.128792	-0.368867	0.0246654	-0.506194	0.00139104	0.58015	0.000167442	0.264775	0.113262	0.407537	0.0122929	0.387614	0.0177715	-0.197557	0.24118	0.170928	0.311778	0.491487	0.00200702	0.276567	0.0975096	0.0514975	0.762121	-0.00322699	0.984877
blue	ENSMUSG00000039099	626359	Wdr93	WD repeat domain 93	0.584186	0.000146968	0.483516	0.00243192	0.23726	0.157379	0.664215	7.38e-06	-0.48966	0.00209815	0.660561	8.62e-06	0.672916	5.05e-06	-0.595671	0.000100431	-0.458915	0.00427789	-0.255296	0.127258	-0.266863	0.110342	0.256053	0.126095	0.0318761	0.851436	0.11428	0.500637	0.137347	0.41758	0.0289389	0.864993	0.0707733	0.677231
blue	ENSMUSG00000054555	11489	Adam12	a disintegrin and metallopeptidase domain 12 (meltrin alpha)	0.176367	0.296398	0.22708	0.176503	0.264258	0.113995	0.284881	0.0874499	-0.215193	0.200867	0.230724	0.169477	0.277945	0.0957841	-0.315755	0.0569409	-0.254552	0.12841	-0.232522	0.166083	-0.0187935	0.91209	0.30906	0.0627054	0.0898231	0.59702	0.0819995	0.629466	-0.133317	0.431502	-0.061693	0.716807	0.208522	0.215521
blue	ENSMUSG00000037548	15000	H2-DMb2	histocompatibility 2, class II, locus Mb2	0.163161	0.334599	0.299943	0.0712867	0.187086	0.267531	0.319141	0.0541901	-0.312762	0.0594631	0.0368845	0.828417	0.0413222	0.808137	0.0594902	0.726523	-0.245854	0.142441	0.140397	0.407214	0.123898	0.465026	-0.0842927	0.619881	-0.236084	0.159507	-0.060122	0.723732	0.483167	0.00245222	0.0989747	0.560021	-0.19567	0.245794
blue	ENSMUSG00000006538	16147	Ihh	Indian hedgehog	-0.401828	0.0136924	-0.366664	0.0256042	-0.293375	0.0780208	-0.376591	0.0215962	0.420924	0.00947906	-0.42907	0.00805145	-0.388079	0.0176235	0.443869	0.005925	0.43285	0.00745416	0.235247	0.161036	0.0497329	0.770049	-0.10793	0.52488	-0.0125641	0.941166	0.101732	0.549086	0.11484	0.498523	0.311448	0.0605984	-0.242972	0.147328
blue	ENSMUSG00000103662	NA	NA	NA	-0.331913	0.0447552	-0.28542	0.0868271	-0.263233	0.115456	-0.436811	0.0068695	0.416721	0.0102963	-0.210434	0.211248	-0.144258	0.394303	0.076511	0.652649	0.40621	0.012607	0.160687	0.342078	-0.158759	0.347978	0.0705002	0.67841	-0.016767	0.921539	-0.226553	0.177537	-0.111553	0.510975	-0.0467661	0.783429	0.212049	0.207683
blue	ENSMUSG00000043924	230822	Ncmap	noncompact myelin associated protein	0.397292	0.014898	0.383345	0.0191794	0.212196	0.207362	0.395033	0.015531	-0.366431	0.0257054	0.355388	0.0308842	0.431135	0.00772023	-0.331807	0.0448271	-0.167223	0.322538	0.183243	0.27766	-0.23628	0.15915	0.0807772	0.6346	-0.118636	0.484339	-0.0635444	0.708675	0.4734	0.00308303	0.218632	0.193588	-0.125222	0.46023
blue	ENSMUSG00000087624	NA	NA	NA	0.108747	0.521729	-0.0803776	0.636282	-0.0933514	0.58263	0.263011	0.115775	-0.122599	0.469753	0.235085	0.161333	0.277401	0.0964618	-0.252557	0.131533	-0.217796	0.19534	-0.134319	0.428018	-0.00938231	0.956049	0.342459	0.0380047	0.00309219	0.985508	0.00169771	0.992043	-0.054655	0.747996	-0.0483666	0.776202	0.0971872	0.567164
blue	ENSMUSG00000065434	723902	Mir7-1	microRNA 7-1	-0.101984	0.548091	-0.17199	0.308736	-0.243796	0.145919	0.114575	0.499522	0.233154	0.164903	-0.0400273	0.814043	-0.146193	0.387925	0.165115	0.328762	0.00651187	0.969488	-0.00892464	0.958191	0.135187	0.42501	-0.0251434	0.882568	-0.0234075	0.890624	0.164689	0.330029	-0.0757582	0.655854	0.0957593	0.572899	0.247269	0.140084
blue	ENSMUSG00000026943	77701	Lcn12	lipocalin 12	-0.398777	0.014494	-0.306258	0.0652513	-0.464829	0.00374869	-0.407106	0.0123944	0.372999	0.0229813	-0.23708	0.157703	-0.462037	0.00399093	0.525398	0.000840411	0.149418	0.377425	0.256401	0.125564	0.365351	0.0261775	-0.199668	0.236087	0.189056	0.262435	0.115349	0.49661	0.10189	0.548464	-0.112539	0.507227	0.140533	0.406754
blue	ENSMUSG00000040836	240888	Gpr161	G protein-coupled receptor 161	0.172451	0.307421	0.236669	0.158446	-0.00969257	0.954597	0.342821	0.0377887	-0.21719	0.196618	0.41078	0.0115534	0.389562	0.0171586	-0.245041	0.143808	-0.0743051	0.662059	-0.109012	0.520709	-0.254922	0.127836	0.00429498	0.979873	0.273337	0.101647	0.196031	0.244907	0.018881	0.911682	0.166908	0.323465	-0.0902862	0.595123
blue	ENSMUSG00000003032	16600	Klf4	Kruppel-like factor 4 (gut)	0.0378864	0.823828	0.17054	0.312895	0.0247865	0.884223	0.193805	0.250413	-0.195585	0.246004	-0.0606911	0.721221	-0.127081	0.453546	0.191576	0.256009	-0.0729991	0.667654	-0.044924	0.791767	0.324134	0.0503287	0.283179	0.089441	0.0245706	0.885225	0.450916	0.00509584	0.229705	0.171421	0.174658	0.301178	-0.239158	0.153985
blue	ENSMUSG00000110035	102632998	Gm30931	predicted gene, 30931	0.59499	0.000102765	0.322039	0.0519214	0.245839	0.142465	0.749671	9.31e-08	-0.363434	0.0270338	0.641374	1.89e-05	0.583039	0.000152544	-0.560071	0.00031259	-0.497165	0.00174548	-0.308999	0.0627599	-0.152703	0.366906	0.268999	0.107413	-0.0198877	0.906993	0.0821727	0.628741	0.0329428	0.846522	0.022056	0.896905	0.123573	0.466205
blue	ENSMUSG00000074813	NA	NA	NA	-0.0875661	0.606306	-0.0340096	0.841614	-0.21379	0.20389	-0.0851647	0.616253	0.09586	0.572494	-0.0880511	0.604305	-0.0678562	0.689859	0.193855	0.250289	0.0150042	0.929766	-0.010716	0.949809	0.0515271	0.761989	-0.2289	0.172968	0.0698995	0.681005	-0.0667514	0.694663	0.125992	0.457455	0.109845	0.517507	-0.00635493	0.970223
blue	ENSMUSG00000032420	23959	Nt5e	5' nucleotidase, ecto	0.382277	0.0195456	0.343065	0.0376435	0.384016	0.0189519	0.329386	0.0465078	-0.13521	0.424932	0.259264	0.12125	-0.132987	0.432652	0.0470412	0.782185	0.0927945	0.584891	0.191259	0.256813	0.130493	0.441409	0.245713	0.142676	-0.235795	0.160035	0.372058	0.0233564	0.339513	0.0398011	0.0299052	0.860528	-0.235411	0.160735
blue	ENSMUSG00000081512	NA	NA	NA	0.292677	0.0787638	0.244532	0.144668	0.0327278	0.847512	0.261563	0.117869	-0.249638	0.136205	0.17959	0.287515	0.24583	0.142481	-0.0885915	0.602079	-0.265041	0.112888	0.0281761	0.86852	-0.0738294	0.664095	-0.210284	0.211581	0.086404	0.611111	0.053884	0.751438	0.252457	0.13169	0.088829	0.601102	0.289485	0.0822358
blue	ENSMUSG00000110439	100861909	Mup22	major urinary protein 22	0.258206	0.122831	0.183196	0.277785	0.0511455	0.763701	0.261672	0.11771	-0.164061	0.331903	0.3602	0.0285308	0.291523	0.0800058	-0.0255623	0.880625	-0.270015	0.106041	-0.391213	0.016653	-0.107362	0.527078	-0.326243	0.048765	0.35626	0.030446	0.0772863	0.649354	-0.224899	0.180807	0.214869	0.201562	0.270567	0.105301
blue	ENSMUSG00000031016	22390	Wee1	WEE 1 homolog 1 (S. pombe)	0.563133	0.000284939	0.354619	0.0312742	0.270657	0.10518	0.850508	2.67e-11	-0.608443	6.46e-05	0.263919	0.114477	0.413334	0.010998	-0.446495	0.00560333	-0.7929	4.91e-09	-0.515325	0.00109869	0.0623731	0.713816	-0.0679231	0.689568	0.191174	0.257028	0.298175	0.0730528	-0.0194232	0.909157	-0.215962	0.199223	0.0454539	0.789366
blue	ENSMUSG00000097331	100038591	F420014N23Rik	RIKEN cDNA F420014N23 gene	-0.286285	0.0858335	-0.155889	0.356874	-0.16935	0.316334	-0.353028	0.0320947	0.353278	0.031965	-0.367817	0.0251092	-0.246683	0.141057	0.106269	0.531315	0.219992	0.190763	0.10633	0.53108	0.0287948	0.865659	-0.111296	0.511959	0.172237	0.308032	0.061939	0.715725	-0.0144486	0.932361	-0.132091	0.435789	0.359461	0.0288823
blue	ENSMUSG00000037606	79196	Osbpl5	oxysterol binding protein-like 5	0.517883	0.00102719	0.408021	0.0121801	0.197143	0.242188	0.671802	5.3e-06	-0.579873	0.000168937	0.478286	0.00275171	0.480371	0.00262005	-0.20745	0.217943	-0.537202	0.000607339	-0.42511	0.00872049	-0.0652693	0.701126	-0.034624	0.83879	0.322144	0.0518404	0.382177	0.0195804	-0.0197742	0.907522	0.23213	0.166819	0.109391	0.519252
blue	ENSMUSG00000113019	NA	NA	NA	0.285397	0.086854	0.31515	0.0574433	0.194127	0.249611	0.279055	0.0944107	-0.289964	0.0817077	0.0718905	0.672418	0.252949	0.130914	-0.302837	0.0684684	-0.112754	0.50641	-0.201714	0.231221	-0.317951	0.0551443	-0.337472	0.0410858	0.117268	0.489425	0.210938	0.210131	-0.103852	0.540748	-0.116503	0.492283	-0.157534	0.351757
blue	ENSMUSG00000033581	319765	Igf2bp2	insulin-like growth factor 2 mRNA binding protein 2	-0.302166	0.0691142	-0.144236	0.394377	0.108233	0.52371	-0.44322	0.00600691	0.437907	0.00671493	-0.220619	0.189469	-0.394232	0.015761	0.453693	0.00479766	0.47326	0.003093	0.41931	0.00978608	0.0840551	0.620872	-0.182496	0.279656	-0.0326616	0.847817	0.155637	0.357659	0.157307	0.352462	0.211161	0.209638	0.0200718	0.906136
blue	ENSMUSG00000036390	13197	Gadd45a	growth arrest and DNA-damage-inducible 45 alpha	0.411108	0.0114809	0.190033	0.259932	0.336327	0.0418204	0.55758	0.000336829	-0.302804	0.0685006	0.0744101	0.66161	0.175798	0.297982	-0.24971	0.136087	-0.473829	0.00305257	-0.462831	0.00392071	-0.0028326	0.986725	-0.05281	0.75624	0.0352643	0.835849	0.146259	0.387709	-0.214136	0.20314	-0.0874175	0.606919	-0.0835579	0.622946
blue	ENSMUSG00000093507	NA	NA	NA	-0.133901	0.42947	-0.0322175	0.849862	-0.183936	0.275815	-0.218465	0.193939	0.0564715	0.739906	0.0333158	0.844805	0.00734844	0.96557	0.137536	0.416933	0.237952	0.156134	0.155732	0.357363	-0.167748	0.321	-0.0912072	0.591357	-0.0190727	0.910789	-0.0186406	0.912803	0.0881949	0.603713	0.188796	0.263105	-0.279166	0.0942736
blue	ENSMUSG00000117192	NA	NA	NA	0.170676	0.312502	0.0296316	0.861792	-0.0230398	0.892333	0.196882	0.242825	-0.189361	0.261651	0.134207	0.428406	0.0835462	0.622995	0.0407104	0.810926	-0.109168	0.520108	-0.33636	0.0417993	-0.0571698	0.736803	-0.0921054	0.587694	0.0480239	0.777748	-0.0345867	0.838961	0.0167715	0.921517	0.149326	0.377724	-0.0152466	0.928634
blue	ENSMUSG00000022149	12279	C9	complement component 9	-0.655048	1.09e-05	-0.601029	8.37e-05	-0.373761	0.0226815	-0.845256	4.67e-11	0.857822	1.18e-11	-0.373238	0.022887	-0.448931	0.00531852	0.319211	0.0541341	0.579278	0.000172193	0.37161	0.0235363	0.00191234	0.991038	0.00227907	0.989319	-0.115581	0.49574	-0.279353	0.0940447	-0.230412	0.170069	-0.0332376	0.845165	0.0681306	0.688667
blue	ENSMUSG00000066175	NA	NA	NA	0.315	0.0575689	0.16035	0.343105	0.267227	0.109839	0.341315	0.0386945	-0.388244	0.0175714	0.11583	0.494804	0.301378	0.0698786	-0.259319	0.121169	-0.366718	0.0255808	-0.209042	0.214353	-0.066302	0.69662	0.0359795	0.832566	-0.0341137	0.841135	0.112095	0.508913	-0.0884001	0.602868	0.0209186	0.902195	-0.015674	0.926639
blue	ENSMUSG00000039304	22035	Tnfsf10	tumor necrosis factor (ligand) superfamily, member 10	0.569087	0.00023735	0.406458	0.0125477	0.303825	0.067527	0.6323	2.69e-05	-0.588801	0.000126338	0.40167	0.013733	0.738635	1.8e-07	-0.737414	1.93e-07	-0.549569	0.000426593	-0.186216	0.269804	-0.34647	0.0356654	0.116957	0.490586	-0.0516564	0.761408	-0.107261	0.527467	0.304647	0.0667507	-0.130877	0.440056	0.0941988	0.579197
blue	ENSMUSG00000112774	NA	NA	NA	0.56988	0.000231586	0.372153	0.0233183	0.301054	0.0701945	0.481222	0.00256791	-0.271497	0.104064	0.34386	0.0371742	0.357147	0.030006	-0.361672	0.0278411	-0.018989	0.911179	0.104309	0.538957	-0.322497	0.0515698	0.222592	0.185442	-0.305129	0.0662996	-0.132958	0.432756	0.299482	0.0717439	0.262282	0.116826	-0.167698	0.321146
blue	ENSMUSG00000074384	621080	AI429214	expressed sequence AI429214	0.0434795	0.798322	0.0509713	0.764483	0.134454	0.42755	-0.214115	0.203186	0.0258623	0.879234	0.2762	0.0979724	0.174445	0.301776	0.0361315	0.831869	0.230339	0.170208	0.0818135	0.630247	-0.301606	0.0696566	-0.219217	0.192369	0.219189	0.192428	0.105036	0.536118	-0.0351293	0.836469	0.200301	0.234575	0.0578747	0.733675
blue	ENSMUSG00000035299	17318	Mid1	midline 1	-0.288118	0.0837581	-0.0977324	0.564981	0.0191816	0.910282	-0.386715	0.0180607	0.312389	0.0597838	0.0239744	0.887992	-0.164954	0.32924	0.136372	0.420925	0.437787	0.00673171	0.306356	0.0651609	-0.137577	0.416792	-0.0146827	0.931267	-0.00978511	0.954164	0.0780732	0.646017	0.049021	0.773254	-0.0278652	0.869958	-0.0186956	0.912546
blue	ENSMUSG00000111594	NA	NA	NA	0.0579515	0.733335	0.225744	0.179132	0.166877	0.323556	0.135387	0.424319	0.0270435	0.873762	0.129153	0.446153	0.158215	0.349655	-0.252618	0.131437	-0.0429538	0.800711	0.144522	0.39343	-0.188796	0.263103	-0.00131912	0.993818	-0.294306	0.0770373	-0.236399	0.158935	0.216076	0.19898	-0.0420257	0.804933	0.0703644	0.678996
blue	ENSMUSG00000109262	NA	NA	NA	0.443719	0.00594382	0.338958	0.0401473	0.381815	0.0197061	0.640297	1.97e-05	-0.646028	1.57e-05	0.0993549	0.558507	0.520411	0.000960634	-0.636972	2.25e-05	-0.601898	8.12e-05	-0.249008	0.137228	-0.174072	0.302826	-0.0433736	0.798803	-0.143216	0.397765	-0.106525	0.530321	0.100347	0.554566	-0.225938	0.178747	-0.148034	0.38191
blue	ENSMUSG00000030411	384569	Nova2	neuro-oncological ventral antigen 2	0.122401	0.470479	0.0922556	0.587083	0.169373	0.316267	0.201732	0.231178	-0.0206318	0.90353	0.000796158	0.996269	-0.223172	0.184268	0.139396	0.410598	-0.111979	0.509356	-0.169961	0.314566	0.294947	0.0763657	0.180061	0.286233	0.0994872	0.557981	0.240692	0.151282	-0.0980658	0.563648	0.00764206	0.964195	-0.182894	0.278591
blue	ENSMUSG00000086587	100038514	Gm11837	predicted gene 11837	0.230028	0.170802	0.106889	0.528909	0.0201052	0.905981	0.35714	0.0300096	-0.146993	0.385304	0.118347	0.485412	0.236801	0.158207	-0.183459	0.277083	-0.230471	0.169958	-0.219456	0.191872	-0.0468816	0.782907	0.0276371	0.871014	0.108347	0.523271	0.222836	0.184948	-0.0511198	0.763816	0.162228	0.337407	0.196332	0.24417
blue	ENSMUSG00000037060	109042	Cavin3	caveolae associated 3	-0.233284	0.164661	-0.0597562	0.725347	0.0102472	0.952001	-0.341426	0.0386273	0.208083	0.216511	-0.0439121	0.796358	-0.26667	0.110609	0.392308	0.0163249	0.421511	0.00936933	0.0969889	0.567958	0.114487	0.499856	-0.0539489	0.751148	0.429173	0.00803472	0.583099	0.000152249	-0.0161625	0.924359	0.178635	0.29013	0.220372	0.189978
blue	ENSMUSG00000044551	268759	9930012K11Rik	RIKEN cDNA 9930012K11 gene	-0.186916	0.267973	0.10053	0.553839	0.0473142	0.780952	-0.248346	0.13831	-0.124537	0.462709	-0.0669535	0.693783	0.0605645	0.721779	0.105519	0.534232	0.216104	0.19892	-0.0724881	0.669849	-0.232376	0.166357	-0.287632	0.0843048	0.405535	0.0127693	0.25622	0.12584	-0.113419	0.503889	0.0655854	0.699746	-0.0931306	0.583526
blue	ENSMUSG00000051225	239463	Fam83a	family with sequence similarity 83, member A	0.00648901	0.969595	0.0384776	0.821123	-0.0421765	0.804247	-0.297332	0.0739066	0.0713066	0.674932	0.222373	0.185886	0.124013	0.464607	-0.105581	0.533991	0.340027	0.0394831	0.123216	0.467504	-0.21287	0.205888	0.196177	0.24455	-0.145552	0.39003	-0.278708	0.0948386	-0.0757646	0.655827	0.104013	0.540117	-0.131541	0.437718
blue	ENSMUSG00000097482	100504568	Gm17634	predicted gene, 17634	0.670859	5.53e-06	0.425823	0.0085967	0.302979	0.0683324	0.639162	2.06e-05	-0.509107	0.00129109	0.677481	4.11e-06	0.6787	3.89e-06	-0.494405	0.00186861	-0.324147	0.0503191	-0.205577	0.22222	-0.380654	0.0201137	0.155216	0.35898	-0.249477	0.136465	-0.171471	0.31022	0.218276	0.194333	0.287984	0.0839085	0.015462	0.927628
blue	ENSMUSG00000022523	14167	Fgf12	fibroblast growth factor 12	0.322027	0.0519304	0.382373	0.0195126	0.281419	0.0915364	0.304191	0.0671803	-0.31538	0.0572524	-0.017272	0.919183	0.00609474	0.971441	-0.119398	0.481516	-0.314849	0.057695	-0.191496	0.256211	0.316304	0.0564869	0.145361	0.390662	0.294464	0.0768708	0.501893	0.00155106	-0.0502189	0.767863	-0.227879	0.174945	0.160408	0.342927
blue	ENSMUSG00000020108	74747	Ddit4	DNA-damage-inducible transcript 4	-0.211187	0.209582	0.0332087	0.845298	-0.131213	0.43887	-0.352251	0.032502	0.109746	0.517887	0.0375296	0.825462	-0.218305	0.194273	0.420051	0.00964398	0.465282	0.00371065	0.178874	0.289473	-0.0988248	0.560619	-0.436784	0.00687344	0.085627	0.614332	0.140888	0.40556	0.0573474	0.736015	0.158738	0.348041	-0.307031	0.0645404
blue	ENSMUSG00000037709	58909	Fam13a	family with sequence similarity 13, member A	0.597922	9.31e-05	0.444225	0.00588052	0.2325	0.166125	0.804275	2.02e-09	-0.629786	2.96e-05	0.406271	0.0125923	0.635753	2.36e-05	-0.598293	9.19e-05	-0.512664	0.00117769	-0.36412	0.026725	-0.282244	0.0905499	0.133542	0.430719	0.157988	0.350353	0.21504	0.201193	0.103911	0.540518	-0.023057	0.892253	0.038244	0.822192
blue	ENSMUSG00000097728	NA	NA	NA	-0.184776	0.27359	-0.235495	0.160581	-0.151602	0.370412	-0.426819	0.0084262	0.383232	0.0192176	-0.0214292	0.89982	-0.185522	0.271623	0.306636	0.064903	0.326586	0.048515	0.411012	0.0115019	0.0422371	0.803971	-0.013206	0.938166	-0.0592882	0.727416	-0.105809	0.533104	0.105464	0.534449	0.175784	0.298022	0.239366	0.153617
blue	ENSMUSG00000066071	277753	Cyp4a12a	cytochrome P450, family 4, subfamily a, polypeptide 12a	0.234803	0.161851	-0.117495	0.488579	0.0600621	0.723996	0.205363	0.222713	0.191046	0.257353	0.395488	0.0154017	0.143308	0.397458	-0.233198	0.164821	0.0095314	0.955351	-0.0421432	0.804399	-0.0347352	0.838279	0.411285	0.0114417	-0.212161	0.207438	-0.0451149	0.790902	-0.0108046	0.949394	0.0913639	0.590717	0.0240839	0.887484
blue	ENSMUSG00000034311	16571	Kif4	kinesin family member 4	0.185363	0.272042	0.126076	0.457152	0.0933666	0.582568	0.217733	0.195473	-0.210501	0.2111	0.240535	0.151557	0.0733334	0.66622	-0.0912468	0.591195	0.116434	0.492541	0.125463	0.45936	-0.0484945	0.775626	0.258861	0.121852	-0.246216	0.141834	0.028476	0.867133	0.286421	0.0856788	0.0377541	0.824434	-0.1091	0.52037
blue	ENSMUSG00000024743	54525	Syt7	synaptotagmin VII	0.412333	0.0112129	0.341947	0.038312	0.345112	0.036444	0.453907	0.00477535	-0.267378	0.10963	0.30648	0.0650468	0.104959	0.536417	0.0550994	0.746014	-0.0956873	0.573189	-0.0521159	0.759349	0.0463571	0.785278	0.0870132	0.60859	0.082581	0.62703	0.496218	0.00178688	0.23359	0.164092	0.328286	0.0472882	-0.126463	0.45576
blue	ENSMUSG00000046908	16995	Ltb4r1	leukotriene B4 receptor 1	-0.181731	0.281711	-0.0813836	0.632051	-0.195452	0.246331	-0.405304	0.0128252	0.414272	0.0107997	-0.17321	0.305265	-0.424493	0.00882906	0.443282	0.00599903	0.336988	0.041395	0.0333793	0.844513	0.344452	0.0368272	0.0999846	0.556004	0.0839378	0.621361	0.121409	0.474111	-0.141605	0.403148	0.14379	0.395855	0.0766244	0.652166
blue	ENSMUSG00000046380	16469	Jrk	jerky	-0.352734	0.0322487	-0.0362798	0.831189	-0.191742	0.255589	-0.501789	0.00155512	0.15457	0.361008	-0.0963491	0.570527	-0.1973	0.241804	0.370165	0.0241258	0.257741	0.123531	0.408917	0.0119736	0.016745	0.921641	-0.311316	0.0607139	0.083252	0.624224	-0.190739	0.258131	0.164016	0.332036	0.0877072	0.605723	0.0543195	0.749493
blue	ENSMUSG00000086961	NA	NA	NA	0.478496	0.00273816	0.392001	0.0164162	0.239647	0.153121	0.548063	0.000445676	-0.438574	0.0066223	0.459129	0.00425759	0.462752	0.0039277	-0.354878	0.0311423	-0.210937	0.210133	-0.483997	0.00240418	-0.294945	0.0763677	0.0256384	0.880272	0.321813	0.0520954	0.219518	0.191745	-0.165776	0.326804	0.159404	0.345998	-0.158233	0.349597
blue	ENSMUSG00000052726	240776	Kcnt2	potassium channel, subfamily T, member 2	-0.501279	0.00157521	-0.368502	0.024819	-0.343862	0.0371728	-0.607218	6.75e-05	0.437354	0.00679262	-0.369968	0.0242071	-0.342763	0.0378235	0.251899	0.132575	0.203928	0.226033	0.232954	0.165275	0.0892956	0.599185	-0.36974	0.0243015	-0.0255537	0.880665	-0.239073	0.154136	-0.133778	0.429897	-0.288188	0.0836794	0.169394	0.316206
blue	ENSMUSG00000112902	NA	NA	NA	0.214749	0.201819	0.196806	0.243011	0.0193428	0.909531	0.4653	0.00370914	-0.339702	0.0396836	0.212938	0.20574	0.369381	0.0244505	-0.247223	0.14016	-0.392918	0.0161441	-0.263368	0.115263	-0.126763	0.454685	-0.248285	0.13841	0.306944	0.0646207	0.122444	0.47032	-0.144809	0.392481	0.0751018	0.658654	0.292192	0.0792842
blue	ENSMUSG00000097462	330385	9530026P05Rik	RIKEN cDNA 9530026P05 gene	-0.00205454	0.990371	0.116673	0.491647	-0.0506651	0.765858	0.255093	0.127572	-0.28328	0.0893218	0.183451	0.277105	0.184014	0.275608	-0.0955267	0.573836	-0.280175	0.0930401	-0.131773	0.436905	0.0845447	0.618832	0.119544	0.480978	0.240454	0.1517	0.152421	0.367804	0.0465701	0.784315	-0.0430669	0.800197	0.0391482	0.818057
blue	ENSMUSG00000085192	NA	NA	NA	-0.111216	0.512263	0.0646063	0.704024	-0.114007	0.501665	-0.350074	0.0336654	-0.100735	0.553026	0.164227	0.331407	0.111968	0.509397	0.0965177	0.569849	0.357049	0.0300542	0.0827305	0.626404	-0.0998311	0.556614	0.14461	0.393138	0.216909	0.19721	0.117529	0.488455	-0.00193125	0.990949	0.208068	0.216546	-0.0159895	0.925166
blue	ENSMUSG00000085189	NA	NA	NA	-0.223496	0.183616	-0.382265	0.0195497	-0.285709	0.0864946	-0.517647	0.00103363	0.359197	0.0290087	0.103513	0.542076	-0.0358084	0.833351	0.0778932	0.646779	0.421652	0.00934319	0.255453	0.127017	-0.0947828	0.576836	0.395717	0.0153372	-0.287608	0.084332	-0.366131	0.0258356	-0.0425041	0.802756	0.15416	0.362299	-0.0609135	0.72024
blue	ENSMUSG00000117914	NA	NA	NA	0.392585	0.0162424	0.224666	0.181272	0.443744	0.00594077	0.316129	0.0566311	-0.000665711	0.99688	0.206218	0.22075	0.149177	0.378205	-0.248552	0.137972	-0.0447767	0.792435	0.06164	0.71704	-0.120908	0.475947	0.114384	0.500242	-0.280959	0.0920904	-0.0895761	0.598033	0.270518	0.105366	0.111206	0.512299	-0.0459822	0.786974
blue	ENSMUSG00000106788	NA	NA	NA	0.300691	0.0705502	0.129209	0.445955	-0.135091	0.425342	0.338856	0.0402109	-0.305928	0.0655558	0.175221	0.299596	0.224602	0.1814	-0.291154	0.0804054	-0.160383	0.343004	-0.109446	0.519041	-0.155066	0.35945	0.07259	0.669411	-0.330308	0.0458619	-0.422349	0.00921471	0.140185	0.407931	-0.139804	0.409217	-0.299874	0.0713554
blue	ENSMUSG00000098091	NA	NA	NA	0.0270943	0.873527	0.045761	0.787976	-0.0190327	0.910976	-0.0796384	0.639398	0.0389178	0.81911	0.0691746	0.684141	0.012203	0.942854	0.0231624	0.891763	0.0508546	0.765007	-0.130309	0.442061	0.00375965	0.982381	0.0796413	0.639386	0.149689	0.376552	0.101845	0.548641	-0.182739	0.279007	0.0660548	0.697698	-0.0856118	0.614396
blue	ENSMUSG00000000303	12550	Cdh1	cadherin 1	-0.682518	3.27e-06	-0.534695	0.00065137	-0.507103	0.00135913	-0.780013	1.26e-08	0.732109	2.61e-07	-0.445538	0.00571885	-0.51236	0.00118703	0.475407	0.00294291	0.606451	6.93e-05	0.228217	0.174288	0.0927	0.585275	-0.0524262	0.757959	0.106171	0.531696	-0.0273932	0.872143	-0.247953	0.138955	0.0738076	0.664188	-0.0109126	0.948889
blue	ENSMUSG00000062861	22690	Zfp28	zinc finger protein 28	0.455572	0.00460464	0.271582	0.103951	0.254178	0.12899	0.691719	2.12e-06	-0.49675	0.00176354	0.486748	0.00225099	0.620835	4.14e-05	-0.516565	0.00106351	-0.448789	0.00533485	-0.205969	0.221319	-0.310904	0.0610734	-0.0961022	0.571519	0.139733	0.409459	0.239375	0.153601	0.131085	0.439322	-7.46e-05	0.99965	0.0143081	0.933017
blue	ENSMUSG00000030724	12478	Cd19	CD19 antigen	0.263973	0.1144	0.325999	0.0489439	-0.0129986	0.939135	0.545409	0.000481154	-0.419224	0.00980263	0.164026	0.332008	0.226868	0.176919	-0.266804	0.110424	-0.357705	0.0297318	0.0163664	0.923407	0.102992	0.544123	0.282341	0.090434	0.0275624	0.87136	0.179852	0.286802	0.327495	0.0478562	-0.117616	0.48813	0.0646869	0.703672
blue	ENSMUSG00000038807	380711	Rap1gap2	RAP1 GTPase activating protein 2	-0.491952	0.00198436	-0.220989	0.18871	-0.0831898	0.624484	-0.451827	0.00499633	0.284428	0.0879772	-0.364509	0.026551	-0.399509	0.014298	0.406011	0.0126546	0.428387	0.00816358	0.55206	0.000396635	0.114361	0.500329	-0.0745222	0.66113	0.0236811	0.889354	0.296356	0.0749054	0.382866	0.0193428	0.0286542	0.866309	-0.111837	0.509897
blue	ENSMUSG00000098235	NA	NA	NA	0.286287	0.0858319	0.197955	0.240215	0.103688	0.54139	0.591592	0.000115162	-0.209857	0.212531	0.270745	0.105064	0.271438	0.104141	-0.242183	0.148689	-0.496392	0.00177923	-0.340445	0.0392254	0.0693131	0.683542	0.0724182	0.670149	0.0722227	0.670989	0.119222	0.482168	0.0545205	0.748596	-0.00414871	0.980558	0.0814042	0.631964
blue	ENSMUSG00000038276	171209	Asic3	acid-sensing (proton-gated) ion channel 3	0.118795	0.48375	0.129907	0.443482	0.0818199	0.63022	0.397579	0.0148193	-0.280239	0.0929623	0.107752	0.52557	0.25627	0.125763	-0.0757874	0.65573	-0.301967	0.0693071	-0.0912515	0.591176	-0.101673	0.54932	-0.123421	0.466757	-0.0587467	0.729812	0.0674553	0.6916	0.140323	0.407464	0.20812	0.216428	-0.178329	0.29097
blue	ENSMUSG00000039485	72480	Tspyl4	TSPY-like 4	-0.237208	0.157473	-0.13242	0.434636	-0.24971	0.136088	-0.373623	0.0227354	0.306912	0.0646495	0.262561	0.116422	0.127964	0.450386	0.00311758	0.985389	0.556995	0.000342762	0.366842	0.0255274	-0.529022	0.000761607	-0.164295	0.331204	-0.271273	0.10436	-0.377604	0.0212183	0.132019	0.43604	0.172505	0.307268	-0.177751	0.292563
blue	ENSMUSG00000103839	NA	NA	NA	-0.260433	0.119522	-0.0865103	0.61067	-0.0189676	0.911279	-0.331268	0.0451972	0.243312	0.146746	-0.112841	0.50608	-0.2523	0.131939	0.346234	0.0357997	0.109662	0.518209	0.261953	0.117302	0.297728	0.0735048	0.153582	0.364121	0.0290855	0.864315	0.110103	0.516519	0.217396	0.196184	0.0414284	0.807653	0.24385	0.145827
blue	ENSMUSG00000111539	NA	NA	NA	-0.130043	0.443001	0.0485983	0.775158	-0.158618	0.34841	-0.214238	0.202921	0.244591	0.144569	-0.0869471	0.608863	-0.252086	0.132278	0.258422	0.122507	0.198187	0.239652	-0.238911	0.154423	0.185995	0.270381	0.106507	0.530391	0.164958	0.32923	0.0333569	0.844616	-0.159415	0.345964	0.131327	0.43847	-0.131835	0.436688
blue	ENSMUSG00000073791	230500	Efcab7	EF-hand calcium binding domain 7	0.0995482	0.557739	0.0510215	0.764257	0.321834	0.0520788	-0.107027	0.528372	-0.0593101	0.727319	0.0905072	0.594218	0.00540127	0.97469	-0.010544	0.950613	-0.0755705	0.656654	0.140737	0.406066	0.109922	0.517215	0.090179	0.595562	-0.0305038	0.857765	0.203836	0.226247	0.164356	0.331023	-0.113541	0.503428	-0.0820342	0.629321
blue	ENSMUSG00000025272	56191	Tro	trophinin	0.0294537	0.862614	0.115044	0.497756	-0.0332087	0.845298	0.211306	0.209319	-0.221675	0.187306	-0.114552	0.499608	-0.00826135	0.961296	0.15395	0.36296	-0.328263	0.0473044	-0.172924	0.306075	0.298189	0.0730386	-0.107327	0.527213	0.399832	0.0142125	0.39972	0.0142422	0.0591496	0.728029	0.0100883	0.952745	0.412605	0.0111542
blue	ENSMUSG00000115882	NA	NA	NA	0.109922	0.517212	-0.0895507	0.598138	0.0175156	0.918047	0.141858	0.402301	0.135701	0.423236	0.11693	0.490686	-0.157726	0.351163	0.135629	0.423485	-0.00155992	0.992689	-0.306038	0.0654544	0.162116	0.337745	0.102437	0.546307	0.0794551	0.640172	0.283457	0.0891135	-0.153031	0.365866	0.0384571	0.821217	-0.119843	0.479872
blue	ENSMUSG00000113630	73815	4930404H11Rik	RIKEN cDNA 4930404H11 gene	0.459342	0.00423761	0.174127	0.302671	0.312839	0.059397	0.718639	5.47e-07	-0.486438	0.00226783	0.28052	0.0926218	0.625185	3.52e-05	-0.733417	2.43e-07	-0.803571	2.13e-09	-0.281219	0.0917779	-0.10136	0.550556	0.13879	0.412656	-0.124011	0.464616	-0.145717	0.389487	0.045757	0.787994	-0.273162	0.101875	0.206393	0.22035
blue	ENSMUSG00000071893	171194	Vmn1r4	vomeronasal 1 receptor 4	0.367203	0.0253718	0.317751	0.055306	0.163634	0.333179	0.349235	0.0341224	-0.227016	0.176629	0.291731	0.0797812	0.1612	0.340518	-0.235157	0.161201	-0.229263	0.172269	-0.274025	0.100754	0.0210039	0.901798	0.197064	0.24238	-0.0828293	0.625991	0.117866	0.487197	-0.100331	0.554628	-0.0533971	0.753614	-0.122143	0.47142
blue	ENSMUSG00000097474	NA	NA	NA	0.217978	0.194958	0.0166739	0.921973	0.212171	0.207417	0.370038	0.024178	-0.415096	0.010628	-0.0880153	0.604453	0.302313	0.068973	-0.300427	0.0708097	-0.494521	0.0018633	-0.2177	0.195543	0.0346032	0.838885	-0.0590011	0.728686	0.170397	0.313305	0.182852	0.278705	-0.0404124	0.812286	-0.110261	0.515913	0.317568	0.0554541
blue	ENSMUSG00000041406	381306	BC055324	cDNA sequence BC055324	0.13039	0.441773	0.00834816	0.960889	-0.037563	0.825309	0.198212	0.239592	-0.0590133	0.728632	0.112758	0.506394	0.203655	0.226668	-0.209839	0.212571	-0.189641	0.260934	0.0088435	0.958571	0.0140008	0.934452	0.0574088	0.735742	0.0418106	0.805913	0.140849	0.405689	0.0131838	0.93827	0.0354278	0.835098	0.213976	0.203487
blue	ENSMUSG00000017491	218772	Rarb	retinoic acid receptor, beta	0.365973	0.0259049	0.387288	0.017876	0.143335	0.397367	0.428221	0.00819103	-0.363177	0.0271507	0.304595	0.0667998	0.21472	0.201881	-0.185986	0.270405	-0.12324	0.467418	-0.333292	0.0438212	0.0128587	0.939789	0.404018	0.0131405	0.215956	0.199235	0.259176	0.121382	0.0510297	0.76422	0.147454	0.3838	-0.164999	0.329108
blue	ENSMUSG00000071551	432720	Akr1c19	aldo-keto reductase family 1, member C19	0.383894	0.0189933	0.0901523	0.595671	0.259987	0.12018	0.781325	1.15e-08	-0.372441	0.0232032	0.0383799	0.82157	0.145131	0.391419	-0.392742	0.016196	-0.761983	4.29e-08	-0.336288	0.0418457	0.302807	0.0684974	0.115117	0.497482	0.0077357	0.963757	0.204564	0.224558	0.0440134	0.795898	-0.362629	0.0274004	0.148782	0.379485
blue	ENSMUSG00000060416	NA	NA	NA	0.398619	0.0145364	0.0953016	0.574743	0.313283	0.0590181	0.317773	0.0552879	-0.293098	0.0783145	0.170983	0.31162	0.381812	0.019707	-0.472625	0.00313862	-0.429636	0.00795945	-0.00831416	0.961048	-0.217291	0.196404	-0.139852	0.409055	-0.330595	0.0456622	-0.196473	0.243825	0.120857	0.476136	-0.250311	0.135116	-0.00450595	0.978884
blue	ENSMUSG00000005628	50874	Tmod4	tropomodulin 4	-0.219064	0.192688	-0.0760728	0.654514	0.0414807	0.807415	-0.146258	0.387711	0.113047	0.505299	-0.209185	0.214033	-0.199521	0.236439	0.213246	0.20507	0.061417	0.718022	-0.0352839	0.835759	0.239649	0.153116	0.00881458	0.958706	0.226717	0.177215	0.251603	0.133046	-0.00515784	0.97583	0.0610751	0.719528	0.101076	0.551677
blue	ENSMUSG00000106291	NA	NA	NA	-0.459628	0.00421083	-0.249	0.137242	-0.297616	0.073618	-0.404389	0.0130489	0.301108	0.0701423	-0.33542	0.0424108	-0.333351	0.0437812	0.330926	0.0454335	0.255568	0.12684	0.419747	0.009702	0.119586	0.480823	-0.0898978	0.596714	-0.189046	0.26246	-0.195929	0.245157	0.0977123	0.565061	0.0278447	0.870053	0.1705	0.31301
blue	ENSMUSG00000086779	NA	NA	NA	-0.269493	0.106745	-0.114255	0.500728	-0.414584	0.0107344	-0.254537	0.128433	0.228423	0.173889	-0.0401251	0.813596	-0.263028	0.11575	0.441048	0.00628813	0.279224	0.0942034	-0.0786948	0.643385	0.165012	0.329071	-0.126062	0.457205	0.316021	0.0567204	0.242866	0.147511	-0.0611805	0.719063	0.175616	0.298492	0.262386	0.116675
blue	ENSMUSG00000002055	54141	Spag5	sperm associated antigen 5	-0.0307314	0.856714	-0.166478	0.324729	0.0738927	0.663824	-0.331583	0.0449807	0.360671	0.0283085	0.159936	0.34437	-0.121073	0.475343	-0.0173208	0.918955	0.430387	0.00783888	0.193884	0.250217	-0.0428049	0.801388	0.318199	0.0549444	-0.160839	0.341616	0.0645271	0.704371	-0.164637	0.330184	-0.00887621	0.958417	0.0264485	0.876517
blue	ENSMUSG00000087163	102632898	Gm16230	predicted gene 16230	-0.0279441	0.869593	-0.128361	0.448972	0.015432	0.927769	-0.112442	0.507594	0.0196049	0.908311	-0.0774584	0.648624	0.145996	0.388571	-0.182334	0.28009	-0.252536	0.131566	-0.0257292	0.879851	0.0743132	0.662024	0.065799	0.698814	-0.171028	0.311492	-0.324633	0.049955	-0.0434147	0.798617	-0.047357	0.780759	0.173869	0.3034
blue	ENSMUSG00000074738	230991	Fndc10	fibronectin type III domain containing 10	0.417218	0.0101966	0.246792	0.140875	0.254167	0.129008	0.344478	0.0368123	-0.304218	0.0671547	0.365903	0.0259354	0.246524	0.141321	-0.138385	0.414035	-0.140111	0.408178	-0.203943	0.225997	-0.0970188	0.567839	0.059227	0.727687	0.177812	0.292394	0.392994	0.0161218	-0.0166733	0.921976	0.0732213	0.666701	-0.240737	0.151204
blue	ENSMUSG00000006494	228026	Pdk1	pyruvate dehydrogenase kinase, isoenzyme 1	0.710183	8.51e-07	0.487031	0.00223573	0.458043	0.00436111	0.940113	6.2e-18	-0.781564	1.13e-08	0.260183	0.11989	0.468605	0.00344146	-0.563995	0.00027756	-0.78735	7.44e-09	-0.421498	0.00937172	0.0574939	0.735364	0.0980436	0.563736	0.0764094	0.653081	0.215016	0.201246	0.1546	0.360911	-0.226475	0.17769	0.0543773	0.749235
blue	ENSMUSG00000038679	83925	Trps1	transcriptional repressor GATA binding 1	-0.264115	0.114198	-0.156273	0.355675	-0.0142789	0.933153	-0.384999	0.018623	0.343042	0.0376574	-0.245456	0.143109	-0.261441	0.118046	0.154066	0.362593	0.256144	0.125957	0.322189	0.0518058	0.0850735	0.616632	0.0178893	0.916304	0.15704	0.353289	0.172734	0.306616	0.0569185	0.737919	-0.0991831	0.559191	0.203211	0.227704
blue	ENSMUSG00000032258	75782	Lca5	Leber congenital amaurosis 5 (human)	-0.134772	0.426448	-0.0218763	0.897741	0.1025	0.546057	-0.33143	0.0450859	0.0905061	0.594222	-0.206517	0.220066	-0.247299	0.140034	0.17669	0.295499	0.18899	0.262604	-0.0189414	0.911401	0.220815	0.189068	0.076347	0.653347	0.242856	0.147529	0.184752	0.273653	-0.272438	0.102822	-0.123319	0.467129	0.247013	0.140508
blue	ENSMUSG00000038085	70873	Cnbd2	cyclic nucleotide binding domain containing 2	0.530384	0.000733726	0.341584	0.0385313	0.328379	0.0472218	0.65573	1.06e-05	-0.4435	0.00597145	0.220041	0.190661	0.341868	0.0383597	-0.381083	0.0199622	-0.378041	0.0210568	-0.29013	0.0815246	-0.00149898	0.992975	0.344165	0.0369949	0.000412427	0.998067	0.3481	0.0347492	0.170271	0.313671	0.0682753	0.688039	-0.00101968	0.995221
blue	ENSMUSG00000046182	269994	Gsg1l	GSG1-like	0.319149	0.054184	0.251601	0.133049	0.141117	0.404787	0.48333	0.00244267	-0.386733	0.0180547	0.0936421	0.581451	0.175881	0.297751	-0.0608199	0.720653	-0.455638	0.00459798	-0.347904	0.0348584	0.116255	0.493211	-0.110966	0.513216	0.264463	0.113705	0.456242	0.00453747	0.00413508	0.980622	0.0335058	0.843931	0.0862845	0.611606
blue	ENSMUSG00000035370	NA	NA	NA	-0.340515	0.0391824	-0.168949	0.317498	-0.264501	0.113651	-0.410773	0.0115551	0.334324	0.043132	-0.153254	0.365159	-0.401675	0.0137316	0.420502	0.00955847	0.461529	0.00403651	0.265627	0.112064	0.127127	0.45338	0.196505	0.243746	-0.14316	0.39795	0.0241984	0.886952	0.143979	0.395229	0.0631722	0.710307	-0.0787323	0.643226
blue	ENSMUSG00000037341	236727	Slc9a7	solute carrier family 9 (sodium/hydrogen exchanger), member 7	-0.402466	0.0135296	-0.0866864	0.609941	-0.35806	0.0295585	-0.46131	0.00405619	0.26701	0.110139	-0.252335	0.131883	-0.354976	0.0310927	0.386061	0.0182735	0.250149	0.135377	0.0146239	0.931542	0.279901	0.0933749	-0.0118566	0.944474	0.261092	0.118556	0.107201	0.5277	-0.24152	0.149837	-0.0233234	0.891015	0.207682	0.217417
blue	ENSMUSG00000086771	NA	NA	NA	0.699678	1.44e-06	0.365483	0.0261197	0.437081	0.00683119	0.829314	2.27e-10	-0.575791	0.000192406	0.562303	0.000292209	0.730045	2.93e-07	-0.718234	5.59e-07	-0.600519	8.51e-05	-0.163501	0.333578	-0.296212	0.0750534	0.199655	0.236119	-0.247338	0.13997	-0.0955242	0.573846	0.301332	0.0699232	-0.00223904	0.989506	-0.00907883	0.957469
blue	ENSMUSG00000039601	53901	Rcan2	regulator of calcineurin 2	0.361464	0.0279377	0.30649	0.0650376	0.408449	0.0120811	0.206505	0.220093	-0.153553	0.364212	0.466338	0.00362318	0.14426	0.394298	-0.110974	0.513188	0.124454	0.46301	0.248933	0.137351	-0.230707	0.169509	-0.00576107	0.973004	-0.261583	0.117839	0.0776946	0.647622	0.342163	0.0381825	0.0860712	0.61249	-0.26291	0.11592
blue	ENSMUSG00000087273	NA	NA	NA	-0.171739	0.309455	0.0175053	0.918095	-0.306377	0.0651417	-0.330099	0.0460076	-0.054145	0.750272	0.116797	0.491185	0.246207	0.14185	0.0404291	0.812209	0.205608	0.22215	0.0688194	0.68568	-0.34423	0.0369568	-0.319268	0.0540893	0.117746	0.487644	-0.169571	0.315692	0.00241598	0.988677	0.146463	0.387037	-0.0976638	0.565255
blue	ENSMUSG00000086536	NA	NA	NA	0.178329	0.290971	-0.0128712	0.939731	0.388464	0.0175018	0.328925	0.0468336	0.101803	0.548805	0.177763	0.292528	0.0747926	0.659975	-0.0937684	0.580939	-0.0869682	0.608776	0.0209592	0.902006	0.00161919	0.992411	0.125367	0.459707	-0.192023	0.254879	0.236748	0.158302	0.13407	0.428883	0.156732	0.354246	0.0597804	0.72524
blue	ENSMUSG00000110055	NA	NA	NA	0.446415	0.00561288	0.202583	0.229175	0.18863	0.263532	0.562481	0.000290629	-0.349179	0.0341533	0.443671	0.00594991	0.519639	0.000980555	-0.451002	0.00508632	-0.420789	0.00950429	-0.0965324	0.569791	-0.0847192	0.618105	0.248995	0.13725	0.0400837	0.813785	0.0681908	0.688406	0.0989941	0.559944	0.10429	0.539032	0.428328	0.00817329
blue	ENSMUSG00000106073	NA	NA	NA	0.405803	0.0127047	0.23768	0.156623	0.405066	0.0128831	0.48652	0.00226337	-0.283691	0.0888391	0.225501	0.179611	0.214259	0.202874	-0.304176	0.0671946	-0.416569	0.010327	-0.0947752	0.576867	0.187895	0.265429	0.31745	0.05555	-0.0429734	0.800622	0.111397	0.511572	0.10987	0.517411	-0.101186	0.551245	0.255234	0.127354
blue	ENSMUSG00000044349	319317	Snhg11	small nucleolar RNA host gene 11	0.748748	9.85e-08	0.491016	0.00203015	0.521846	0.000924577	0.768924	2.71e-08	-0.535325	0.000640036	0.469395	0.00338003	0.466578	0.00360352	-0.593783	0.000107023	-0.498301	0.00169693	-0.1615	0.339608	-0.137187	0.418127	0.226657	0.177333	-0.252379	0.131814	-0.0426255	0.802204	0.189282	0.261855	-0.132434	0.434588	0.0281598	0.868595
blue	ENSMUSG00000118168	NA	NA	NA	0.593476	0.000108134	0.412172	0.0112479	0.327468	0.0478751	0.927826	1.47e-16	-0.570891	0.000224416	0.388319	0.0175477	0.471693	0.00320668	-0.527023	0.000804213	-0.665091	7.1e-06	-0.403682	0.013224	-0.0550587	0.746196	0.0550875	0.746067	0.105052	0.536053	0.210828	0.210374	0.105586	0.533973	-0.152957	0.366102	0.0346203	0.838807
blue	ENSMUSG00000087327	NA	NA	NA	0.161952	0.338241	0.147091	0.384983	-0.0109935	0.94851	0.237097	0.157672	-0.160994	0.341146	0.232792	0.165578	0.0825819	0.627027	0.00103262	0.99516	0.0553869	0.744733	-0.19627	0.244321	-0.082088	0.629095	0.0166585	0.922045	0.189931	0.260192	0.245497	0.143039	-0.013498	0.936801	0.0805954	0.635365	-0.267135	0.109965
blue	ENSMUSG00000022468	19011	Endou	endonuclease, polyU-specific	0.232974	0.165238	0.152247	0.368358	0.25054	0.134748	0.463712	0.00384408	-0.265541	0.112185	0.225528	0.179558	0.423217	0.00905682	-0.393924	0.0158502	-0.347643	0.0350041	-0.0871291	0.608111	-0.20611	0.220997	0.102439	0.546298	-0.271341	0.104271	-0.140342	0.407398	0.299442	0.0717838	0.0546203	0.748151	-0.0752703	0.657935
blue	ENSMUSG00000033470	70086	Cysltr2	cysteinyl leukotriene receptor 2	-0.0816714	0.630843	0.0158893	0.925634	-0.243692	0.146097	-0.235349	0.160848	0.217348	0.196283	-0.139398	0.410594	-0.167215	0.322563	0.130807	0.440301	0.175483	0.298863	0.269898	0.106198	0.0828404	0.625945	0.213793	0.203883	-0.0252208	0.882209	-0.0452078	0.790481	0.259856	0.120373	0.0129283	0.939464	0.189441	0.261446
blue	ENSMUSG00000031860	80720	Pbx4	pre B cell leukemia homeobox 4	0.490537	0.00205396	0.247877	0.139081	0.371418	0.0236139	0.62449	3.61e-05	-0.330789	0.0455283	0.15688	0.353785	0.226066	0.178496	-0.288268	0.0835895	-0.342314	0.0380919	-0.244532	0.144668	-0.00949252	0.955533	0.153159	0.365459	-0.203659	0.226659	0.0343977	0.83983	0.127333	0.452643	0.0953307	0.574626	-0.086554	0.610489
blue	ENSMUSG00000109799	NA	NA	NA	0.052595	0.757203	0.0253098	0.881796	-0.121871	0.472415	0.166603	0.324361	-0.155847	0.357005	0.0532959	0.754066	0.0722506	0.670869	-0.00259231	0.987851	-0.116178	0.493501	-0.147321	0.384233	-0.0451747	0.790631	-0.23278	0.165601	0.0822111	0.62858	0.0568106	0.738399	-0.175849	0.29784	-0.0587389	0.729846	0.16065	0.342192
blue	ENSMUSG00000040289	15213	Hey1	hairy/enhancer-of-split related with YRPW motif 1	-0.102719	0.545197	0.0141217	0.933887	-0.0487134	0.774639	-0.192804	0.252916	-0.133405	0.431196	0.130943	0.439823	0.240563	0.151508	-0.104612	0.537774	0.0542952	0.749602	-0.0713016	0.674954	-0.279599	0.0937432	-0.191956	0.255049	0.310027	0.0618455	0.0354189	0.835139	-0.185655	0.271274	-0.0415153	0.807258	0.0580662	0.732826
blue	ENSMUSG00000032418	17436	Me1	malic enzyme 1, NADP(+)-dependent, cytosolic	0.598939	8.99e-05	0.434098	0.00726559	0.560697	0.000306746	0.752795	7.68e-08	-0.531129	0.000718853	0.172655	0.306842	0.149928	0.375782	-0.320821	0.0528649	-0.497386	0.00173592	-0.28479	0.0875558	0.152645	0.367092	0.0570745	0.737226	-0.0242523	0.886702	0.335594	0.0422969	0.187605	0.266183	-0.215595	0.200005	-0.149523	0.377086
blue	ENSMUSG00000042686	57339	Jph1	junctophilin 1	0.575163	0.000196264	0.327227	0.0480491	0.382568	0.0194452	0.752549	7.8e-08	-0.557604	0.000336591	0.250338	0.135073	0.344973	0.0365243	-0.399513	0.014297	-0.469158	0.00339832	-0.150133	0.375122	0.0885682	0.602175	0.387268	0.0178823	-0.184655	0.273911	0.160159	0.343688	0.355778	0.0306877	0.0675043	0.691388	-0.0284503	0.867252
blue	ENSMUSG00000067203	630499	H2-K2	histocompatibility 2, K region locus 2	0.344614	0.0367332	0.320068	0.053456	0.213041	0.205516	0.536926	0.000612061	-0.518169	0.00101947	0.153651	0.363904	0.0992103	0.559083	0.131956	0.436263	-0.358853	0.0291739	-0.115695	0.49531	0.17782	0.292371	-0.281633	0.0912797	0.165976	0.326212	0.446853	0.00556072	0.325086	0.0496182	0.254419	0.128616	-0.181113	0.283381
blue	ENSMUSG00000090034	NA	NA	NA	0.177229	0.294006	0.285226	0.0870504	0.0812836	0.632471	0.255608	0.126779	-0.281749	0.091141	0.188818	0.263048	0.152642	0.367102	-0.150248	0.374751	-0.0749807	0.659171	-0.0553322	0.744977	-0.0125416	0.941271	0.0741106	0.662891	0.160827	0.341653	0.122401	0.470477	-0.0202037	0.905522	-0.0907421	0.593257	-0.0128031	0.940049
blue	ENSMUSG00000086728	76794	Man2c1os	mannosidase, alpha, class 2C, member 1, opposite strand	0.385034	0.0186115	0.228733	0.17329	0.325987	0.0489528	0.496158	0.00178953	-0.216294	0.198516	0.0512921	0.763043	0.0347632	0.83815	-0.117648	0.48801	-0.261153	0.118466	-0.179439	0.287929	0.176609	0.295724	0.143809	0.395792	0.112547	0.507196	0.419289	0.00979016	0.0201963	0.905557	-0.0239031	0.888323	0.00582165	0.97272
blue	ENSMUSG00000094724	68195	Rnaset2b	ribonuclease T2B	-0.264771	0.113269	-0.111838	0.509892	0.0011179	0.994761	-0.157428	0.352086	0.135631	0.423478	-0.177061	0.29447	-0.154916	0.35992	0.149449	0.377326	0.0137386	0.935678	0.206057	0.221119	0.250469	0.134862	0.165733	0.326931	-0.255396	0.127105	-0.01473	0.931047	0.222626	0.185373	-0.022932	0.892833	-0.0150953	0.92934
blue	ENSMUSG00000115793	NA	NA	NA	0.0459348	0.787189	0.20911	0.214201	-0.0539399	0.751188	-0.0827898	0.626156	-0.0858505	0.613405	-0.103077	0.543788	-0.0206889	0.903264	0.0132954	0.937748	0.0397459	0.815327	0.147653	0.383149	0.0590493	0.728473	0.0766105	0.652226	-0.096531	0.569796	0.0498272	0.769624	0.108801	0.52152	0.020291	0.905116	0.0845031	0.619005
blue	ENSMUSG00000051498	21899	Tlr6	toll-like receptor 6	-0.0764453	0.652928	-0.035737	0.833679	-0.247996	0.138885	-0.273444	0.101508	0.24225	0.148572	0.126189	0.456746	0.210167	0.211841	-0.240866	0.150978	0.273995	0.100794	0.448153	0.00540812	-0.357612	0.0297772	0.150034	0.37544	-0.284755	0.0875968	-0.425916	0.00858068	0.168135	0.319869	0.0218736	0.897753	-0.0143865	0.932651
blue	ENSMUSG00000046688	211550	Tifa	TRAF-interacting protein with forkhead-associated domain	-0.374039	0.0225729	-0.242326	0.148442	-0.0701427	0.679954	-0.750802	8.69e-08	0.394839	0.0155865	-0.173118	0.305527	-0.199759	0.235868	0.172275	0.307923	0.669219	5.94e-06	0.448898	0.00532236	-0.19053	0.258665	0.0595817	0.726119	-0.235595	0.160398	-0.317425	0.0555707	-0.00361591	0.983054	0.0281838	0.868485	-0.18601	0.270342
blue	ENSMUSG00000033453	235130	Adamts15	a disintegrin-like and metallopeptidase (reprolysin type) with thrombospondin type 1 motif, 15	-0.178156	0.291447	-0.0507306	0.765563	-0.0212097	0.900841	-0.349968	0.0337226	0.327727	0.0476887	-0.0546501	0.748018	-0.224343	0.181917	0.229327	0.172147	0.335638	0.0422682	-0.0607807	0.720826	0.105576	0.534012	0.202105	0.2303	0.219343	0.192107	0.327566	0.0478045	-0.27558	0.0987594	0.131985	0.43616	0.0992003	0.559123
blue	ENSMUSG00000019232	71760	Etnppl	ethanolamine phosphate phospholyase	0.381939	0.0196629	0.178597	0.290233	0.269342	0.106949	0.635256	2.4e-05	-0.383876	0.0189992	0.133438	0.431082	0.392654	0.016222	-0.52409	0.000870566	-0.565437	0.000265599	-0.0890487	0.600199	-0.119642	0.480613	-0.0110028	0.948467	-0.153867	0.363221	0.00265316	0.987566	0.230676	0.169568	-0.188587	0.263642	-0.00121633	0.994299
blue	ENSMUSG00000048497	216829	Mmgt2	membrane magnesium transporter 2	-0.410297	0.0116613	-0.142042	0.401684	-0.124206	0.463908	-0.445195	0.00576064	0.168778	0.317994	-0.336087	0.0419764	-0.40418	0.0131004	0.434319	0.00723265	0.227077	0.176509	0.386835	0.0180219	0.235928	0.159791	-0.35897	0.0291178	0.136128	0.421763	0.252248	0.132022	0.134905	0.425987	-0.0954579	0.574113	0.108083	0.52429
blue	ENSMUSG00000047415	238377	Gpr68	G protein-coupled receptor 68	0.171918	0.308942	0.0965013	0.569915	0.102456	0.54623	0.254914	0.127848	-0.137855	0.415844	0.155061	0.359464	0.19144	0.256354	-0.0626335	0.712672	-0.211081	0.209815	-0.103687	0.541394	-0.154369	0.361638	-0.242484	0.148169	0.251205	0.133682	0.218563	0.193733	0.044437	0.793976	-0.0171771	0.919626	0.222561	0.185504
blue	ENSMUSG00000086401	100504049	Gm15559	predicted gene 15559	0.120638	0.476942	0.0909002	0.592611	-0.224577	0.18145	0.185086	0.272773	-0.17615	0.297001	0.175228	0.299576	0.190264	0.259341	-0.0752534	0.658007	-0.20589	0.221501	-0.111093	0.512731	0.0799174	0.638221	0.139182	0.411324	0.212371	0.206978	0.268678	0.10785	0.0288714	0.865305	0.0329122	0.846663	0.269745	0.106404
blue	ENSMUSG00000010025	11671	Aldh3a2	aldehyde dehydrogenase family 3, subfamily A2	0.732023	2.62e-07	0.500947	0.00158838	0.438434	0.00664161	0.887233	2.6e-13	-0.563116	0.000285078	0.583091	0.000152285	0.443515	0.00596958	-0.424075	0.0089031	-0.471387	0.00322929	-0.288362	0.0834849	-0.0919763	0.58822	0.157182	0.352848	-0.0335894	0.843546	0.261209	0.118385	0.234435	0.162529	0.00588159	0.97244	-0.0320516	0.850627
blue	ENSMUSG00000075256	228094	Cerkl	ceramide kinase-like	0.124058	0.464444	0.132201	0.435401	0.154874	0.360051	-0.170557	0.312846	-0.120682	0.476781	0.417409	0.0101585	0.31156	0.0605012	-0.147209	0.384599	0.239269	0.153789	0.179453	0.287889	-0.316508	0.0563192	0.135283	0.424679	-0.0804953	0.635787	-0.0422516	0.803905	0.0885539	0.602234	0.1274	0.452401	0.217209	0.196576
blue	ENSMUSG00000037989	75607	Wnk2	WNK lysine deficient protein kinase 2	0.285012	0.0872982	0.326214	0.0487862	0.168434	0.318998	0.395697	0.0153427	-0.351317	0.032997	0.0705103	0.678366	0.0177362	0.917019	0.057086	0.737175	-0.166433	0.324862	-0.172122	0.308359	0.266473	0.110883	0.214465	0.202431	0.147464	0.383766	0.499357	0.00165284	0.178063	0.291702	0.203478	0.227082	-0.075957	0.655007
blue	ENSMUSG00000017861	17865	Mybl2	myeloblastosis oncogene-like 2	0.46467	0.00376211	0.335314	0.0424798	0.29507	0.0762368	0.460878	0.00409549	-0.208405	0.215786	0.527736	0.000788773	0.493754	0.00189874	-0.411638	0.0113642	-0.182378	0.279975	-0.00690619	0.967641	-0.257681	0.123622	0.335179	0.0425685	-0.124543	0.462687	-0.115344	0.49663	0.215935	0.199279	0.19325	0.251798	0.000310665	0.998544
blue	ENSMUSG00000090785	NA	NA	NA	0.335364	0.0424475	0.0990558	0.559698	0.327172	0.0480895	0.540483	0.000553743	-0.190711	0.258202	0.256237	0.125814	0.394859	0.0155809	-0.426517	0.00847763	-0.33155	0.0450031	-0.299283	0.0719425	-0.118635	0.484341	0.355394	0.0308811	0.0915041	0.590145	0.212635	0.206402	-0.0391988	0.817827	0.0934823	0.582099	0.080672	0.635043
blue	ENSMUSG00000029843	243755	Slc13a4	solute carrier family 13 (sodium/sulfate symporters), member 4	0.61203	5.69e-05	0.329496	0.0464305	0.258823	0.121908	0.607942	6.58e-05	-0.322956	0.0512188	0.667637	6.36e-06	0.549808	0.000423637	-0.465498	0.00369263	-0.178615	0.290184	-0.173735	0.303778	-0.419036	0.00983898	0.165993	0.326163	-0.209423	0.213499	-0.158558	0.348595	0.159061	0.34705	0.208933	0.214599	-0.165819	0.326677
blue	ENSMUSG00000045467	269954	Ttll13	tubulin tyrosine ligase-like family, member 13	0.287793	0.0841236	0.191176	0.257022	-0.121726	0.472947	0.338648	0.0403411	-0.418686	0.00990696	0.257261	0.124256	0.499347	0.00165323	-0.375641	0.0219554	-0.375585	0.021977	0.015745	0.926308	-0.212738	0.206175	0.0253862	0.881442	0.18309	0.278067	-0.116947	0.490623	0.233212	0.164795	-0.0484253	0.775938	0.292552	0.0788978
blue	ENSMUSG00000027323	19361	Rad51	RAD51 recombinase	-0.0781268	0.645789	-0.0909174	0.592541	-0.141943	0.402015	-0.300017	0.0712142	0.191191	0.256985	0.106938	0.528717	-0.238715	0.154773	0.176769	0.295279	0.354799	0.0311828	0.300226	0.0710074	0.0750775	0.658758	-0.00213121	0.990012	-0.176904	0.294905	0.0193545	0.909477	0.137175	0.418169	-0.126261	0.456488	-0.194909	0.247672
blue	ENSMUSG00000092051	NA	NA	NA	-0.0738777	0.663888	0.0309732	0.855599	-0.114104	0.501301	-0.188026	0.265092	-0.127874	0.45071	0.0172408	0.919329	0.13615	0.42169	0.0353954	0.835247	-0.0518969	0.76033	0.164556	0.330425	-0.0599766	0.724374	-0.19445	0.248809	-0.0584298	0.731215	-0.238199	0.155694	0.0488983	0.773806	0.0258845	0.879131	0.0967507	0.568914
blue	ENSMUSG00000041237	18770	Pklr	pyruvate kinase liver and red blood cell	0.431658	0.00763838	0.305307	0.0661333	0.331429	0.0450864	0.565611	0.000264182	-0.329119	0.0466962	-0.0703849	0.678908	-0.0887161	0.601567	-0.0760978	0.654407	-0.429191	0.00803172	-0.203456	0.227131	0.3316	0.044969	-0.00847775	0.960283	0.0477489	0.778989	0.244429	0.144843	0.157247	0.352646	-0.0943714	0.578499	-0.130026	0.443061
blue	ENSMUSG00000039196	18405	Orm1	orosomucoid 1	-0.517823	0.00102884	-0.391214	0.0166528	-0.182372	0.27999	-0.85841	1.1e-11	0.542794	0.000518552	-0.360294	0.0284866	-0.343766	0.0372293	0.245962	0.142259	0.53747	0.0006028	0.386349	0.0181795	-0.0760802	0.654483	-0.145966	0.38867	-0.215736	0.199705	-0.391573	0.0165445	-0.173591	0.304186	-0.117549	0.488377	-0.0547796	0.74744
blue	ENSMUSG00000053965	242202	Pde5a	phosphodiesterase 5A, cGMP-specific	0.391463	0.0165777	0.0962491	0.570929	0.332883	0.0440963	0.483955	0.0024066	-0.110246	0.515973	0.201276	0.232257	0.291664	0.079853	-0.448997	0.005311	-0.413694	0.0109215	-0.0533058	0.754022	-0.0551152	0.745944	0.181034	0.283594	-0.0366752	0.829376	0.259174	0.121385	0.249982	0.135647	-0.221804	0.187042	0.218255	0.194377
blue	ENSMUSG00000046402	19659	Rbp1	retinol binding protein 1, cellular	-0.376036	0.0218053	-0.114252	0.500739	-0.495059	0.00183875	-0.397633	0.0148045	0.0410349	0.809447	0.0801242	0.63735	0.0958228	0.572643	0.154765	0.360395	0.39151	0.0165633	0.0292085	0.863747	-0.2659	0.111682	-0.0199719	0.906602	0.123707	0.465717	-0.152596	0.367245	-0.0832706	0.624146	0.219828	0.191102	-0.155736	0.357351
blue	ENSMUSG00000032400	68014	Zwilch	zwilch kinetochore protein	0.220893	0.188906	0.117137	0.489914	0.285512	0.0867204	0.130394	0.441758	0.130651	0.440853	0.362962	0.0272483	0.066281	0.696712	-0.12778	0.451044	0.0378669	0.823917	0.229521	0.171773	0.0237898	0.888849	0.188493	0.263884	-0.264983	0.112969	0.0571759	0.736776	0.178777	0.289739	0.00855008	0.959944	0.128657	0.447918
blue	ENSMUSG00000021260	214305	Hhipl1	hedgehog interacting protein-like 1	0.708636	9.21e-07	0.48277	0.00247543	0.408453	0.0120802	0.809159	1.35e-09	-0.618503	4.51e-05	0.491397	0.00201143	0.622265	3.92e-05	-0.632533	2.67e-05	-0.710424	8.41e-07	-0.355401	0.0308775	-0.125044	0.460873	0.132101	0.435755	0.0324851	0.84863	0.180405	0.285298	0.0676284	0.690848	-0.127148	0.453303	0.164771	0.329785
blue	ENSMUSG00000093080	100526466	Mir3060	microRNA 3060	-0.0737086	0.664612	-0.120399	0.477822	0.0158941	0.925612	-0.265889	0.111697	0.100133	0.555413	0.0373422	0.82632	-0.069988	0.680622	0.0431291	0.799915	0.141324	0.404094	-0.130934	0.439855	0.0400365	0.814	0.263069	0.115692	0.0233342	0.890965	0.0607653	0.720894	-0.362985	0.027238	-0.0408289	0.810386	-0.148747	0.379595
blue	ENSMUSG00000087484	NA	NA	NA	0.555684	0.00035639	0.434126	0.00726143	0.275917	0.0983308	0.66499	7.14e-06	-0.574711	0.000199089	0.263123	0.115614	0.547936	0.000447313	-0.47702	0.0028344	-0.411154	0.0114708	-0.232662	0.165822	-0.291338	0.0802058	0.0622955	0.714157	0.0863496	0.611336	0.060653	0.721389	0.132239	0.435271	0.132685	0.433707	-0.0503976	0.76706
blue	ENSMUSG00000009108	14686	Gnat2	guanine nucleotide binding protein, alpha transducing 2	-0.65172	1.25e-05	-0.468936	0.00341563	-0.365024	0.0263222	-0.815766	7.71e-10	0.689121	2.4e-06	-0.349723	0.0338559	-0.488159	0.00217577	0.435992	0.00698704	0.50658	0.00137741	0.288001	0.0838896	0.118584	0.484532	-0.133827	0.429728	0.12834	0.449045	-0.038475	0.821135	-0.209831	0.212589	-0.115478	0.496124	0.109891	0.517333
blue	ENSMUSG00000047996	546336	Prrg1	proline rich Gla (G-carboxyglutamic acid) 1	0.266495	0.110853	0.206913	0.219163	0.109267	0.51973	0.407233	0.0123643	-0.496043	0.00179463	-0.216488	0.198103	0.015699	0.926522	-0.108997	0.520765	-0.5348	0.000649473	-0.339709	0.0396796	0.228082	0.17455	-0.200506	0.234085	0.154024	0.362727	0.219127	0.192557	-0.03749	0.825643	-0.369251	0.0245045	-0.107389	0.526973
blue	ENSMUSG00000003355	66120	Fkbp11	FK506 binding protein 11	-0.766012	3.3e-08	-0.536687	0.000616158	-0.407678	0.0122601	-0.875157	1.4e-12	0.782954	1.02e-08	-0.433765	0.00731546	-0.600882	8.41e-05	0.603345	7.72e-05	0.629609	2.98e-05	0.357097	0.0300307	0.155368	0.358504	-0.109831	0.517561	-0.0432283	0.799464	-0.106444	0.530637	-0.131663	0.43729	0.0605984	0.721629	-0.0127351	0.940367
blue	ENSMUSG00000030004	68396	Nat8	N-acetyltransferase 8 (GCN5-related)	0.090468	0.594378	-0.122251	0.471027	-0.294521	0.0768116	0.253477	0.130086	0.0884625	0.60261	0.380949	0.0200094	0.173757	0.303715	-0.101531	0.549881	-0.00507151	0.976234	-0.104468	0.538335	-0.181662	0.281899	0.0971324	0.567383	-0.0792258	0.64114	-0.214502	0.20235	-0.081997	0.629477	0.127288	0.452802	-0.0746084	0.660762
blue	ENSMUSG00000068196	12837	Col8a1	collagen, type VIII, alpha 1	0.337013	0.0413792	0.20286	0.228524	0.435572	0.00704812	0.183701	0.276439	-0.191849	0.255318	0.311498	0.060555	0.179156	0.288701	-0.101704	0.549197	-0.0589756	0.728799	-0.342616	0.037911	-0.155965	0.356637	-0.0407937	0.810546	0.121246	0.474709	0.26269	0.116237	-0.18783	0.265599	0.0898016	0.597108	-0.192724	0.253117
blue	ENSMUSG00000098041	NA	NA	NA	-0.404797	0.0129486	-0.273738	0.101127	-0.367958	0.0250491	-0.577397	0.000182847	0.50159	0.00156295	-0.270861	0.104909	-0.419715	0.00970818	0.413583	0.010945	0.239527	0.153332	0.275795	0.0984869	0.217693	0.195557	-0.185231	0.272391	0.107679	0.525848	-0.298731	0.0724941	-0.112573	0.507096	-0.124821	0.461679	0.311456	0.0605916
blue	ENSMUSG00000113662	NA	NA	NA	0.106022	0.532275	-0.0350484	0.83684	0.227064	0.176536	0.307798	0.0638418	-0.290512	0.0811064	0.168743	0.318097	0.313266	0.0590327	-0.332177	0.0445749	-0.262357	0.116718	0.168334	0.319288	-0.0909674	0.592336	0.188729	0.263277	-0.0699266	0.680888	0.119233	0.482125	0.402156	0.0136084	-0.16525	0.328362	-0.116691	0.49158
blue	ENSMUSG00000082065	NA	NA	NA	0.7002	1.41e-06	0.361887	0.0277418	0.309486	0.0623256	0.606951	6.81e-05	-0.392395	0.016299	0.737744	1.89e-07	0.557871	0.000333908	-0.513664	0.00114743	-0.204703	0.224235	-0.272284	0.103025	-0.313363	0.0589502	0.33968	0.0396975	-0.156407	0.355257	0.0143418	0.932859	-0.0587516	0.72979	0.129578	0.444648	-0.0623702	0.713828
blue	ENSMUSG00000056004	231014	9330182L06Rik	RIKEN cDNA 9330182L06 gene	0.0939052	0.580385	0.113323	0.504254	0.129344	0.445477	0.248889	0.137422	-0.0198426	0.907204	0.172155	0.308265	0.0365478	0.82996	-0.0845574	0.618779	-0.0523674	0.758222	-0.00528974	0.975212	0.0744911	0.661263	-0.000197745	0.999073	0.192332	0.254103	0.267616	0.109303	-0.00804915	0.962289	-0.0444704	0.793824	0.302645	0.0686532
blue	ENSMUSG00000025586	12877	Cpeb1	cytoplasmic polyadenylation element binding protein 1	0.659108	9.17e-06	0.448108	0.0054133	0.47897	0.00270788	0.763065	4e-08	-0.663987	7.45e-06	0.443827	0.00593029	0.620178	4.24e-05	-0.67387	4.84e-06	-0.715497	6.46e-07	-0.372685	0.0231061	-0.0649719	0.702426	0.293802	0.0775677	-0.0193195	0.90964	0.203473	0.227093	0.141629	0.403067	-0.184226	0.275047	0.0636872	0.708048
blue	ENSMUSG00000110827	NA	NA	NA	0.0799936	0.6379	0.210429	0.211258	0.160911	0.341397	-0.193591	0.250948	0.11879	0.483768	0.407666	0.0122629	0.00994745	0.953404	0.0344257	0.839701	0.30509	0.0663358	0.171716	0.30952	-0.0652994	0.700995	0.252231	0.132048	0.0552547	0.745322	0.071172	0.675512	0.13699	0.418804	0.0301354	0.859465	0.159388	0.346047
blue	ENSMUSG00000036356	234356	Csgalnact1	chondroitin sulfate N-acetylgalactosaminyltransferase 1	0.122192	0.471241	0.234985	0.161516	0.0224002	0.895305	0.290231	0.0814137	-0.236668	0.158448	-0.156766	0.354142	-0.135185	0.425019	0.0692107	0.683985	-0.284857	0.0874783	-0.276854	0.0971477	0.272683	0.102501	-0.0481517	0.777172	0.142524	0.400073	0.221067	0.188549	-0.148007	0.381998	-0.12349	0.466506	-0.0586314	0.730322
blue	ENSMUSG00000027692	665113	Tnik	TRAF2 and NCK interacting kinase	-0.255082	0.127589	-0.0597732	0.725272	-0.365895	0.025939	-0.247797	0.139213	0.25176	0.132797	-0.0727228	0.66884	-0.172254	0.307983	0.204086	0.225666	0.332344	0.0444614	0.20521	0.223064	-0.00930085	0.95643	0.0949389	0.576206	0.0241129	0.887349	-0.0490993	0.772901	0.0259525	0.878816	0.118259	0.485737	-0.064266	0.705513
blue	ENSMUSG00000097757	NA	NA	NA	-0.153312	0.364976	-0.0599695	0.724405	-0.199713	0.235978	-0.203396	0.227271	0.137572	0.416809	0.198643	0.23855	0.102875	0.544582	0.0788651	0.642665	0.101138	0.551431	-0.0870648	0.608377	-0.139322	0.410851	-0.0599271	0.724592	0.309255	0.0625314	-0.0803664	0.636329	-0.247533	0.139647	0.0649044	0.702721	0.385291	0.0185266
blue	ENSMUSG00000106103	NA	NA	NA	0.0240221	0.887771	-0.0385853	0.820631	0.12009	0.47896	0.128351	0.449008	0.053832	0.75167	-0.0719497	0.672163	-0.0752858	0.657869	0.0845854	0.618662	-0.221282	0.188109	0.13261	0.43397	0.0950917	0.57559	-0.174231	0.302378	-0.179858	0.286785	-0.0371947	0.826995	0.123789	0.46542	-0.0174601	0.918306	0.0991565	0.559297
blue	ENSMUSG00000038233	245050	Gask1a	golgi associated kinase 1A	0.31212	0.0600155	0.29518	0.0761221	0.105787	0.533191	0.393204	0.01606	-0.333071	0.0439694	-0.00205527	0.990368	0.0336708	0.843172	0.0322446	0.849737	-0.138786	0.41267	-0.297081	0.0741625	0.0447418	0.792593	-0.227432	0.175816	0.390589	0.0168428	0.362705	0.0273654	-0.0687933	0.685793	0.103711	0.5413	-0.0870792	0.608317
blue	ENSMUSG00000064141	381549	Zfp69	zinc finger protein 69	0.185588	0.27145	-0.0180357	0.915622	-0.0144399	0.932401	0.378795	0.0207811	-0.10209	0.547672	0.196904	0.242771	0.349108	0.0341922	-0.404388	0.0130491	-0.0849625	0.617093	-0.0824471	0.627591	-0.385317	0.018518	0.0851039	0.616505	-0.100796	0.552785	-0.16109	0.340852	-0.00899155	0.957878	0.0507159	0.765629	0.0476984	0.779217
blue	ENSMUSG00000113536	NA	NA	NA	0.419281	0.00979162	0.302612	0.0686848	0.360967	0.0281696	0.580502	0.000165563	-0.345125	0.0364368	0.185019	0.272948	0.379607	0.0204874	-0.295924	0.0753511	-0.297556	0.0736797	-0.31218	0.059964	-0.283994	0.0884833	-0.22111	0.188461	0.22512	0.180369	0.212066	0.207648	-0.0278278	0.870131	0.151936	0.369347	0.0906495	0.593636
blue	ENSMUSG00000072945	622473	Ripply1	ripply transcriptional repressor 1	0.198142	0.239762	-0.0858006	0.613612	0.277256	0.096644	-0.053964	0.75108	-0.0177564	0.916924	0.240123	0.152281	0.148191	0.381402	-0.190017	0.259973	0.101622	0.549522	0.0482229	0.776851	-0.160616	0.342295	-0.0539285	0.751239	-0.241884	0.149205	-0.101106	0.551562	-0.0793606	0.640571	-0.101876	0.548518	-0.0914333	0.590434
blue	ENSMUSG00000086279	NA	NA	NA	0.0315725	0.852835	-0.129314	0.445581	-0.279493	0.0938733	0.148114	0.381649	0.046139	0.786265	0.048595	0.775173	0.00694998	0.967436	-0.0450284	0.791294	0.010519	0.95073	-0.0250071	0.8832	0.00270713	0.987313	0.267975	0.108809	-0.110445	0.51521	-0.0470489	0.78215	0.0022765	0.989331	0.10454	0.538054	-0.0638259	0.707441
blue	ENSMUSG00000052504	13837	Epha3	Eph receptor A3	0.281019	0.0920189	0.255091	0.127576	0.131288	0.438607	0.242168	0.148714	-0.15517	0.359124	0.284673	0.0876923	0.0625265	0.713142	0.0400403	0.813983	-0.233902	0.163512	-0.127637	0.451555	0.118331	0.485472	-0.0714133	0.674473	0.263921	0.114473	0.528138	0.000780194	0.0401873	0.813312	-0.136489	0.420521	0.17058	0.31278
blue	ENSMUSG00000036944	213068	Tmem71	transmembrane protein 71	-0.319242	0.0541093	0.033793	0.84261	-0.188999	0.262582	-0.365507	0.0261091	-0.0844763	0.619117	-0.367772	0.0251282	-0.188908	0.262815	0.204635	0.224393	0.131133	0.439154	0.301761	0.0695067	0.154983	0.359708	-0.237546	0.156863	0.0945146	0.57792	0.0719286	0.672254	0.233371	0.164499	-0.239736	0.152963	-0.0553729	0.744795
blue	ENSMUSG00000104830	NA	NA	NA	-0.204058	0.22573	-0.139413	0.410544	-0.0825826	0.627023	-0.130582	0.441095	0.0281668	0.868563	-0.240119	0.152287	0.0793598	0.640574	-0.0807012	0.63492	0.0177386	0.917007	0.0581347	0.732522	-0.127953	0.450426	-0.0514191	0.762473	0.161031	0.341034	-0.0222669	0.895924	0.108902	0.521131	-0.0224973	0.894853	0.30048	0.070757
blue	ENSMUSG00000031596	11988	Slc7a2	solute carrier family 7 (cationic amino acid transporter, y+ system), member 2	0.260172	0.119906	0.209574	0.213163	0.134399	0.427741	0.405039	0.0128897	-0.414483	0.0107556	0.191886	0.255225	0.613052	5.49e-05	-0.563378	0.000282819	-0.493233	0.00192315	-0.274606	0.100006	-0.223531	0.183546	0.140191	0.407909	0.15393	0.363022	0.00699842	0.967209	0.0362346	0.831396	-0.059229	0.727678	0.355069	0.0310452
blue	ENSMUSG00000046417	192976	Lrrc75a	leucine rich repeat containing 75A	-0.487189	0.00222724	-0.226595	0.177455	-0.099459	0.558093	-0.646771	1.52e-05	0.350814	0.0332664	-0.427684	0.00828052	-0.559528	0.000317733	0.49926	0.00165682	0.376091	0.0217846	0.398054	0.0146896	0.383908	0.0189885	-0.0791503	0.641459	0.0606393	0.721449	0.177436	0.293433	0.0478072	0.778726	-0.117733	0.487695	0.123794	0.465405
blue	ENSMUSG00000005514	18984	Por	P450 (cytochrome) oxidoreductase	0.392216	0.0163521	0.300886	0.0703594	0.158554	0.34861	0.590874	0.000117948	-0.571122	0.00022281	0.468896	0.0034187	0.516316	0.00107048	-0.193207	0.251907	-0.474053	0.00303683	-0.398261	0.0146333	-0.105751	0.53333	0.0211355	0.901186	0.138277	0.414403	0.0912281	0.591271	0.0453835	0.789685	0.383202	0.019228	-0.0528952	0.755859
blue	ENSMUSG00000048572	226040	Tmem252	transmembrane protein 252	0.0157835	0.926128	-0.0535819	0.752788	0.0808087	0.634468	0.2437	0.146082	0.141731	0.402727	0.0027499	0.987112	-0.156744	0.354209	-0.00426565	0.98001	-0.0126478	0.940775	0.245419	0.143171	0.0776084	0.647987	0.0557466	0.743131	-0.344458	0.0368239	0.135326	0.424531	0.373852	0.022646	-0.0584596	0.731083	-0.218677	0.193495
blue	ENSMUSG00000000167	72614	Pih1d2	PIH1 domain containing 2	-0.338468	0.0404548	-0.184771	0.273603	-0.193411	0.251396	-0.521765	0.000926578	0.538453	0.000586382	-0.0745427	0.661043	-0.372748	0.0230808	0.328581	0.0470784	0.456194	0.00454228	0.122885	0.46871	0.173355	0.304855	0.15402	0.362739	0.172836	0.306325	0.157659	0.351372	-0.194802	0.247937	0.0393599	0.81709	0.202617	0.229096
blue	ENSMUSG00000033389	216831	Arhgap44	Rho GTPase activating protein 44	-0.380655	0.0201133	-0.185506	0.271666	-0.18402	0.275592	-0.507939	0.00133039	0.397547	0.0148281	-0.127266	0.45288	-0.424265	0.0088694	0.613894	5.32e-05	0.476572	0.00286423	0.161266	0.340319	0.132069	0.435865	-0.331969	0.0447168	0.441668	0.00620673	0.412739	0.0111254	-0.109728	0.517957	0.241012	0.150722	-0.0209613	0.901997
blue	ENSMUSG00000022526	71591	Zfp251	zinc finger protein 251	-0.728321	3.23e-07	-0.368487	0.0248251	-0.425245	0.00869709	-0.727171	3.44e-07	0.686767	2.68e-06	-0.361862	0.0277532	-0.463051	0.00390142	0.568258	0.000243518	0.576518	0.000188022	0.215669	0.199847	0.0580305	0.732984	-0.207198	0.218515	0.277407	0.0964543	0.0635315	0.708731	-0.204228	0.225335	0.185019	0.272949	0.161183	0.340572
blue	ENSMUSG00000026840	23928	Lamc3	laminin gamma 3	0.367815	0.0251099	0.355614	0.0307702	0.359203	0.029006	0.403417	0.01329	-0.374594	0.0223573	0.304466	0.0669218	0.115979	0.494247	0.0745594	0.660971	-0.185181	0.272521	-0.218213	0.194466	0.137911	0.415654	0.0154855	0.927519	0.291887	0.0796129	0.557736	0.000335264	0.118723	0.484015	0.21423	0.202937	0.0250335	0.883077
blue	ENSMUSG00000040502	216438	2020-03-09	membrane-associated ring finger (C3HC4) 9	-0.188548	0.263741	-0.0030403	0.985752	-0.296248	0.0750161	-0.320653	0.0529968	0.257097	0.124505	0.0259566	0.878797	-0.229897	0.171053	0.402486	0.0135245	0.32012	0.0534148	-0.140531	0.406763	0.0991407	0.55936	-0.058165	0.732388	0.440118	0.006412	0.333839	0.0434547	-0.238395	0.155343	0.2104	0.211324	0.110878	0.513554
blue	ENSMUSG00000085995	NA	NA	NA	-0.232756	0.165645	-0.0624435	0.713507	-0.125963	0.457558	-0.44978	0.00522222	0.325459	0.0493416	0.0500904	0.768441	-0.316184	0.0565862	0.348867	0.0343245	0.445029	0.00578106	0.308341	0.0633513	0.239926	0.152628	0.397917	0.0147269	-0.0411233	0.809044	0.0997922	0.556769	0.118387	0.485262	0.0547072	0.747763	0.0556963	0.743355
blue	ENSMUSG00000026355	17219	Mcm6	minichromosome maintenance complex component 6	-0.458537	0.00431374	-0.262245	0.116879	-0.0427158	0.801794	-0.591614	0.000115079	0.486388	0.00227054	-0.264556	0.113572	-0.435027	0.00712784	0.245063	0.14377	0.408916	0.0119737	0.411664	0.0113585	0.17473	0.300974	-0.0945657	0.577713	-0.120264	0.478318	0.0819284	0.629765	0.0347844	0.838053	-0.29254	0.0789103	-0.0220485	0.89694
blue	ENSMUSG00000085498	100503468	Gm14023	predicted gene 14023	-0.129495	0.444942	-0.195066	0.247285	-0.225308	0.179996	-0.149211	0.378096	0.157396	0.352186	0.0188321	0.91191	0.20154	0.231631	-0.18449	0.274347	0.0265005	0.876277	-0.0727296	0.668811	-0.278385	0.095238	0.0130967	0.938677	0.166485	0.32471	-0.31137	0.0606663	-0.281208	0.0917904	0.0282724	0.868074	0.23574	0.160134
blue	ENSMUSG00000028541	53418	B4galt2	UDP-Gal:betaGlcNAc beta 1,4- galactosyltransferase, polypeptide 2	0.155623	0.357704	0.251159	0.133755	0.138312	0.414285	0.248229	0.138502	-0.19275	0.253053	0.0542051	0.750004	0.0501092	0.768356	0.00990661	0.953595	-0.141226	0.404421	-0.0315751	0.852823	0.0441221	0.795405	0.0503462	0.767291	0.217961	0.194994	0.47429	0.00302017	0.265326	0.112486	0.0157334	0.926362	0.0146729	0.931313
blue	ENSMUSG00000002500	66211	Rpl3l	ribosomal protein L3-like	0.0435778	0.797876	0.15556	0.357901	0.0360101	0.832426	-0.0665529	0.695527	-0.140077	0.408294	0.133565	0.430637	0.00881865	0.958687	0.0774402	0.648701	0.051215	0.763388	-0.0391351	0.818117	-0.00525084	0.975394	-0.115779	0.494998	0.021751	0.898323	0.146037	0.388436	0.0590392	0.728517	-0.0690646	0.684618	-0.236447	0.158847
blue	ENSMUSG00000071723	14853	Gspt2	G1 to S phase transition 2	-0.184161	0.275218	-0.0650779	0.701962	-0.105056	0.536039	-0.393743	0.0159028	0.134592	0.42707	-0.14453	0.393404	-0.186556	0.268915	0.316863	0.0560288	0.216435	0.198216	-0.0111026	0.948	0.101325	0.550694	-0.288965	0.0828121	0.394273	0.0157492	0.280058	0.0931828	-0.18682	0.268225	0.0744445	0.661463	0.197258	0.241907
blue	ENSMUSG00000026620	226778	Mark1	MAP/microtubule affinity regulating kinase 1	0.105797	0.533153	-0.0129538	0.939345	0.219459	0.191867	0.279198	0.0942343	-0.0390657	0.818435	0.12936	0.445418	0.019632	0.908184	0.0520264	0.75975	-0.0890503	0.600193	0.0512831	0.763083	0.0692742	0.68371	0.0829134	0.625639	-0.0489729	0.77347	0.273368	0.101607	0.0990968	0.559535	0.166098	0.32585	0.0148266	0.930595
blue	ENSMUSG00000054702	252903	Ap1s3	adaptor-related protein complex AP-1, sigma 3	-0.410729	0.0115649	0.0121743	0.942988	-0.00241769	0.988669	-0.494765	0.00185211	0.310464	0.0614597	-0.244279	0.145097	-0.287418	0.084546	0.191295	0.25672	0.289911	0.081765	0.285114	0.0871801	0.0677037	0.690521	-0.127003	0.453824	0.065953	0.698142	0.131014	0.439572	0.0855762	0.614543	-0.290509	0.0811095	-0.00339536	0.984088
blue	ENSMUSG00000098284	NA	NA	NA	0.260191	0.119879	0.0890858	0.600047	0.000695304	0.996741	0.430846	0.00776597	-0.205598	0.222172	0.158143	0.349874	0.248485	0.138083	-0.152903	0.366271	-0.420002	0.00965342	-0.307947	0.0637067	-0.0487179	0.774619	-0.326305	0.0487197	0.245213	0.143517	0.231318	0.168349	-0.025871	0.879194	-0.0692861	0.683659	0.320218	0.0533375
blue	ENSMUSG00000007594	330790	Hapln4	hyaluronan and proteoglycan link protein 4	-0.42589	0.00858521	-0.324467	0.0500793	-0.0601859	0.72345	-0.620745	4.15e-05	0.631528	2.77e-05	-0.392657	0.0162212	-0.606321	6.96e-05	0.453718	0.00479514	0.495207	0.00183207	0.38039	0.0202073	0.19753	0.241245	-0.185536	0.271586	-0.136612	0.4201	-0.0378486	0.824001	-0.0621849	0.714643	-0.119619	0.480701	-0.120843	0.476188
blue	ENSMUSG00000048965	244238	Mrgpre	MAS-related GPR, member E	-0.364043	0.0267596	-0.159747	0.344948	-0.207762	0.217237	-0.54319	0.000512722	0.259914	0.120288	-0.0901244	0.595785	0.0919882	0.588171	-0.0217697	0.898236	0.369385	0.0244487	0.145886	0.388934	-0.36761	0.0251973	-0.106292	0.531225	-0.0297895	0.861062	-0.302172	0.0691082	-0.137567	0.416828	0.0650165	0.702231	-0.0765696	0.6524
blue	ENSMUSG00000024053	246707	Emilin2	elastin microfibril interfacer 2	-0.461891	0.00400401	-0.415696	0.0105045	-0.262492	0.116523	-0.567422	0.000249881	0.421567	0.00935891	-0.176511	0.295998	-0.350753	0.0332986	0.428431	0.0081564	0.565911	0.000261763	0.635865	2.35e-05	0.00218476	0.989761	-0.0817488	0.630518	-0.0558916	0.742486	-0.0683522	0.687705	0.151975	0.369221	0.111443	0.511398	0.0707651	0.677267
blue	ENSMUSG00000025165	209588	Sectm1a	secreted and transmembrane 1A	-0.377012	0.0214385	-0.112784	0.506297	-0.32765	0.0477442	-0.631393	2.79e-05	0.300535	0.0707036	0.002102	0.990149	-0.14658	0.386657	0.250052	0.135534	0.601019	8.37e-05	0.593349	0.000108593	-0.13427	0.428187	-0.0246028	0.885076	-0.143795	0.395841	-0.227108	0.176449	0.135353	0.424436	0.0835465	0.622993	-0.0826489	0.626746
blue	ENSMUSG00000032375	208117	Aph1b	aph1 homolog B, gamma secretase subunit	-0.365683	0.0260315	-0.221075	0.188533	-0.441135	0.00627677	-0.294645	0.0766812	0.105118	0.535798	-0.224868	0.180869	-0.143764	0.395944	0.22784	0.175022	0.191337	0.256613	-0.00947814	0.9556	0.0498817	0.769379	0.0927061	0.58525	0.266395	0.110991	0.182241	0.280341	0.00111189	0.994789	-0.00576584	0.972982	-0.0362837	0.831171
blue	ENSMUSG00000041920	104681	Slc16a6	solute carrier family 16 (monocarboxylic acid transporters), member 6	-0.583458	0.000150486	-0.364611	0.0265055	-0.311899	0.0602073	-0.82178	4.54e-10	0.69284	2.01e-06	-0.350632	0.0333636	-0.709363	8.88e-07	0.739148	1.74e-07	0.723352	4.24e-07	0.491617	0.00200063	0.237527	0.156897	-0.0848423	0.617593	-0.0941525	0.579384	-0.051196	0.763474	0.0354658	0.834924	0.10888	0.521216	0.0337808	0.842666
blue	ENSMUSG00000052776	246730	Oas1a	2'-5' oligoadenylate synthetase 1A	-0.551192	0.000406852	-0.257703	0.123588	-0.120374	0.477914	-0.721014	4.81e-07	0.483603	0.00242688	-0.320244	0.0533174	-0.342642	0.0378952	0.360364	0.0284534	0.471037	0.00325539	0.654218	1.12e-05	0.0334833	0.844035	-0.0826875	0.626584	-0.152605	0.367218	-0.119879	0.479738	0.338028	0.0407322	0.0174206	0.91849	-0.100715	0.553107
blue	ENSMUSG00000033318	14872	Gstt2	glutathione S-transferase, theta 2	0.584109	0.000147334	0.366177	0.0258158	0.322026	0.0519309	0.762428	4.17e-08	-0.652525	1.21e-05	0.588035	0.000129568	0.742486	1.43e-07	-0.508507	0.00131115	-0.508997	0.00129474	-0.171932	0.308901	-0.349185	0.03415	0.078177	0.645577	-0.125364	0.45972	-0.014237	0.933349	0.299192	0.0720327	0.282073	0.0907534	-0.0747388	0.660205
blue	ENSMUSG00000037405	15894	Icam1	intercellular adhesion molecule 1	-0.685548	2.84e-06	-0.392093	0.0163888	-0.343573	0.0373432	-0.867386	3.77e-12	0.710352	8.44e-07	-0.317764	0.0552956	-0.622225	3.93e-05	0.724487	3.99e-07	0.778602	1.4e-08	0.435936	0.00699517	0.129712	0.444173	-0.149194	0.378149	0.05153	0.761975	0.0809604	0.633829	-0.0581957	0.732252	0.234817	0.161825	-0.0892103	0.599535
blue	ENSMUSG00000019945	73287	Cabcoco1	ciliary associated calcium binding coiled-coil 1	0.553736	0.000377548	0.374437	0.0224184	0.204227	0.225338	0.746726	1.11e-07	-0.723608	4.18e-07	0.277869	0.0958777	0.669132	5.96e-06	-0.682768	3.23e-06	-0.678227	3.98e-06	-0.299936	0.0712942	-0.163898	0.33239	0.182963	0.278407	0.127959	0.450404	0.0399781	0.814267	0.148769	0.379525	-0.119845	0.479866	0.134588	0.427082
blue	ENSMUSG00000044378	277898	Slc15a5	solute carrier family 15, member 5	0.52445	0.000862176	0.232387	0.166337	0.402799	0.0134453	0.508231	0.00132048	-0.131013	0.439578	0.663969	7.46e-06	0.491196	0.00202131	-0.502447	0.0015296	-0.135656	0.423392	-0.149393	0.377507	-0.348171	0.0347098	0.246368	0.141582	-0.219007	0.192807	-0.106197	0.531594	0.0745312	0.661092	0.139642	0.409765	-0.0948872	0.576415
blue	ENSMUSG00000057123	14613	Gja5	gap junction protein, alpha 5	0.328512	0.0471273	0.356632	0.0302606	0.0972267	0.567006	0.416647	0.0103113	-0.269013	0.107394	0.231496	0.168014	0.0597955	0.725174	-0.0679893	0.689281	-0.226338	0.177959	-0.157148	0.352955	0.116772	0.491277	-0.0282324	0.86826	0.103843	0.540783	0.256377	0.1256	0.2807	0.0924033	-0.0336233	0.843391	-0.00803734	0.962344
blue	ENSMUSG00000049092	70713	Gpr137c	G protein-coupled receptor 137C	0.300949	0.0702971	0.0648328	0.703034	0.10745	0.526738	0.487875	0.0021907	-0.429695	0.00795001	0.127175	0.453207	0.569384	0.000235181	-0.500722	0.00159734	-0.377591	0.021223	-0.115924	0.494451	-0.375923	0.0218485	-0.128209	0.449513	0.123249	0.467385	-0.101491	0.550036	0.00580966	0.972777	0.0342997	0.84028	0.157969	0.350412
blue	ENSMUSG00000062563	12879	Cys1	cystin 1	0.099396	0.558344	0.202923	0.228378	0.0720967	0.671531	0.402308	0.0135698	-0.216138	0.198847	-0.0813976	0.631992	-0.0138941	0.934951	0.110187	0.516197	-0.262686	0.116243	-0.301796	0.0694725	0.0901173	0.595814	-0.363364	0.0270658	0.39522	0.0154778	0.547757	0.000449641	-0.0468621	0.782995	0.0777511	0.647382	0.0083773	0.960753
blue	ENSMUSG00000029167	19017	Ppargc1a	peroxisome proliferative activated receptor, gamma, coactivator 1 alpha	0.250603	0.134647	0.268015	0.108755	0.179867	0.286761	0.380686	0.0201023	-0.472294	0.00316269	0.126804	0.454539	0.531523	0.000711106	-0.542937	0.000516445	-0.494189	0.00187857	-0.275434	0.098946	-0.0537274	0.752138	0.328569	0.0470865	0.215306	0.200623	0.143993	0.395183	-0.0215761	0.899136	-0.114671	0.49916	0.370257	0.0240877
blue	ENSMUSG00000053024	21367	Cntn2	contactin 2	-0.172554	0.307128	0.0638912	0.707154	-0.333943	0.0433856	-0.30872	0.0630106	0.0634062	0.709281	0.0101068	0.952659	-0.0103351	0.95159	0.147708	0.382971	0.30078	0.0704632	0.0589702	0.728823	-0.260295	0.119725	-0.261627	0.117775	0.351161	0.03308	-0.125695	0.458523	-0.089651	0.597726	0.0594369	0.726759	-0.0481365	0.77724
blue	ENSMUSG00000050908	383103	Tvp23a	trans-golgi network vesicle protein 23A	-0.271135	0.104544	-0.118443	0.485055	-0.0338151	0.842508	-0.364928	0.0263646	0.269465	0.106782	-0.0903461	0.594877	-0.145096	0.391532	0.202308	0.229821	0.287334	0.0846411	0.331379	0.0451209	0.0198812	0.907024	-0.0214271	0.899829	0.0534673	0.7533	0.0620926	0.715049	0.133669	0.430276	0.105496	0.534325	0.0942658	0.578926
blue	ENSMUSG00000049971	319804	Glt1d1	glycosyltransferase 1 domain containing 1	0.573828	0.000204705	0.369138	0.0245521	0.249547	0.136351	0.801177	2.58e-09	-0.696107	1.72e-06	0.484426	0.00237971	0.782293	1.07e-08	-0.688199	2.51e-06	-0.585481	0.000140893	-0.464899	0.00374283	-0.372559	0.0231558	0.0315115	0.853116	0.110185	0.516206	0.0611535	0.719182	-0.0415652	0.80703	0.00978071	0.954184	0.0413403	0.808055
blue	ENSMUSG00000032489	16578	Kif9	kinesin family member 9	-0.582042	0.000157545	-0.342787	0.0378091	-0.414434	0.0107658	-0.680481	3.59e-06	0.498043	0.00170786	-0.310631	0.0613127	-0.247194	0.140209	0.232527	0.166074	0.463798	0.00383664	0.571231	0.000222054	-0.11039	0.51542	-0.261712	0.117652	-0.157057	0.353238	-0.299678	0.0715498	0.0851581	0.61628	-0.0760286	0.654702	-0.0279933	0.869366
blue	ENSMUSG00000037541	210274	Shank2	SH3 and multiple ankyrin repeat domains 2	0.263233	0.115456	0.17653	0.295943	0.103349	0.542721	0.420672	0.00952646	-0.27653	0.0975565	-0.04301	0.800456	0.124251	0.463745	0.0164244	0.923137	-0.287776	0.0841422	-0.114166	0.501066	0.108158	0.523999	-0.107832	0.525259	0.289638	0.0820669	0.343612	0.0373197	0.112505	0.507353	0.31315	0.0591314	0.134052	0.428943
blue	ENSMUSG00000045314	78088	Sowahb	sosondowah ankyrin repeat domain family member B	-0.285576	0.0866476	-0.154061	0.36261	-0.143609	0.396458	-0.493725	0.00190008	0.317962	0.0551359	-0.193544	0.251063	-0.292287	0.079182	0.411127	0.0114766	0.634587	2.46e-05	0.268192	0.108513	-0.304927	0.0664886	-0.505124	0.00142943	0.0452416	0.790328	-0.0442816	0.794681	-0.0951623	0.575305	0.20634	0.220472	-0.296214	0.0750516
blue	ENSMUSG00000086657	70957	Stamos	signal transducing adaptor molecule (SH3 domain and ITAM motif) 1, opposite strand	-0.0704204	0.678755	-0.0413555	0.807986	-0.310929	0.0610517	-0.212983	0.205641	-0.00723053	0.966122	0.165107	0.328788	0.297616	0.0736188	-0.0300245	0.859977	0.0534003	0.753599	-0.0186219	0.91289	-0.250724	0.134453	-0.0921552	0.587491	0.15545	0.358245	-0.0670111	0.693533	-0.0330643	0.845963	0.109709	0.51803	0.225139	0.180331
blue	ENSMUSG00000040035	214240	Disp2	dispatched RND tramsporter family member 2	0.254002	0.129265	0.171207	0.310979	0.0543083	0.749543	0.506223	0.00139001	-0.500471	0.00160742	0.154253	0.362005	0.375787	0.0218999	-0.384438	0.0188103	-0.472541	0.00314475	-0.0696219	0.682205	-0.0778073	0.647143	-0.0115286	0.946008	0.0716148	0.673605	-0.0795643	0.639711	0.173143	0.305454	-0.205561	0.222257	0.090434	0.594518
blue	ENSMUSG00000030228	18705	Pik3c2g	phosphatidylinositol-4-phosphate 3-kinase catalytic subunit type 2 gamma	0.791392	5.51e-09	0.60747	6.69e-05	0.413136	0.0110401	0.730984	2.78e-07	-0.717453	5.82e-07	0.460919	0.00409173	0.604467	7.43e-05	-0.680058	3.66e-06	-0.497519	0.00173022	-0.305181	0.0662513	-0.170934	0.311761	0.248945	0.137331	-0.126769	0.454664	-0.00764805	0.964167	0.0917439	0.589167	-0.119852	0.47984	-0.00770497	0.9639
blue	ENSMUSG00000097113	100503460	Gm19705	predicted gene, 19705	-0.440889	0.00630922	-0.402323	0.0135661	-0.503129	0.00150351	-0.550031	0.000420889	0.457636	0.0044004	-0.0244967	0.885568	-0.0411485	0.808929	0.107979	0.524691	0.468495	0.00345008	0.145585	0.389923	-0.188796	0.263103	0.117296	0.489321	0.0166422	0.922121	-0.208534	0.215494	-0.274536	0.100095	0.170681	0.312488	0.012684	0.940606
blue	ENSMUSG00000115200	NA	NA	NA	-0.0983596	0.562474	0.0326536	0.847854	0.0788448	0.642751	-0.356703	0.0302256	0.231072	0.168817	0.0961375	0.571377	-0.0138129	0.93533	-0.000768397	0.996399	0.22793	0.174847	0.199629	0.236182	-0.115709	0.495257	-0.14942	0.377418	-0.0634355	0.709152	-0.0929253	0.584359	-0.100448	0.554167	-0.0857807	0.613694	-0.0730708	0.667347
blue	ENSMUSG00000037664	12577	Cdkn1c	cyclin-dependent kinase inhibitor 1C (P57)	0.447166	0.00552358	0.432262	0.00754452	0.451543	0.00502718	0.608989	6.34e-05	-0.537222	0.000607008	0.0614337	0.717948	0.23512	0.161269	-0.196146	0.244625	-0.532269	0.000696643	-0.102305	0.546826	0.191801	0.255441	0.180008	0.286376	0.0963289	0.570608	0.486583	0.0022599	0.378419	0.0209181	0.0255179	0.880831	0.0634944	0.708894
blue	ENSMUSG00000074862	268319	BC025920	zinc finger protein pseudogene	0.018811	0.912009	0.0557456	0.743135	-0.107363	0.527071	-0.0128297	0.939925	-0.00829493	0.961138	-0.0356548	0.834056	0.0738299	0.664093	-0.0149049	0.930229	-0.0394633	0.816618	0.0160952	0.924673	0.0333271	0.844753	0.278922	0.0945742	0.0248214	0.884061	-0.0257532	0.87974	0.146195	0.387917	0.0944594	0.578143	0.21071	0.210636
blue	ENSMUSG00000087177	327744	E130307A14Rik	RIKEN cDNA E130307A14 gene	0.258019	0.123112	0.212774	0.206099	0.28596	0.0862055	0.534667	0.000651867	-0.386819	0.0180271	0.162324	0.337117	0.299354	0.0718717	-0.308755	0.0629784	-0.424076	0.00890297	-0.170879	0.311918	0.0837875	0.621988	0.342166	0.0381802	0.0811756	0.632925	0.159863	0.344591	0.250038	0.135556	0.0470749	0.782033	0.0755992	0.656532
blue	ENSMUSG00000059743	110196	Fdps	farnesyl diphosphate synthetase	-0.0942724	0.578899	0.0488906	0.773841	-0.0173861	0.918651	-0.191978	0.254994	-0.0663865	0.696252	-0.119119	0.482547	-0.303656	0.0676875	0.258326	0.122652	0.348355	0.0346077	-0.0440161	0.795886	0.146586	0.386636	0.0883862	0.602924	0.208075	0.216529	0.256205	0.125862	-0.0634379	0.709142	-0.00511437	0.976034	-0.292398	0.0790626
blue	ENSMUSG00000035818	226245	Plekhs1	pleckstrin homology domain containing, family S member 1	0.273502	0.101432	0.102678	0.545357	0.274375	0.100303	0.410605	0.0115924	-0.0945367	0.577831	0.220189	0.190356	0.189528	0.261224	-0.215008	0.201263	-0.165416	0.327869	-0.0139527	0.934677	0.0690146	0.684834	0.368379	0.0248709	0.154631	0.360815	0.528796	0.000766318	0.15493	0.359875	0.0767803	0.651504	0.190273	0.259318
blue	ENSMUSG00000025574	21877	Tk1	thymidine kinase 1	0.469022	0.00340893	0.235656	0.160287	0.183984	0.275687	0.788342	6.91e-09	-0.492617	0.00195236	0.417047	0.0102309	0.685424	2.86e-06	-0.498373	0.00169387	-0.643158	1.76e-05	-0.424867	0.00876322	-0.277586	0.0962309	-0.0540581	0.75066	0.229296	0.172205	0.122271	0.470953	0.0169166	0.920841	0.192111	0.254658	0.222897	0.184824
blue	ENSMUSG00000078817	378425	Nlrp12	NLR family, pyrin domain containing 12	-0.53276	0.000687247	-0.381751	0.0197283	-0.34238	0.038052	-0.644594	1.66e-05	0.643135	1.76e-05	-0.0755823	0.656604	-0.547309	0.000455508	0.645358	1.61e-05	0.600119	8.63e-05	0.428546	0.00813733	0.259831	0.120411	0.0720326	0.671807	-0.0869441	0.608875	-0.0350846	0.836674	0.00840142	0.96064	0.182501	0.279644	0.137395	0.417415
blue	ENSMUSG00000118423	NA	NA	NA	0.209258	0.21387	0.216889	0.197254	0.0158007	0.926047	0.195035	0.247362	-0.180471	0.285117	-0.000184323	0.999136	-0.00534991	0.97493	-0.0664426	0.696008	-0.16589	0.326467	-0.111549	0.510994	0.120647	0.476909	0.0234972	0.890208	-0.186429	0.269244	-0.0488267	0.774129	0.202848	0.228553	-0.126958	0.453987	0.0322657	0.84964
blue	ENSMUSG00000040219	235330	Ttc12	tetratricopeptide repeat domain 12	-0.181487	0.282371	-0.172567	0.307092	-0.174768	0.300867	-0.289063	0.082703	0.222355	0.185921	-0.0152181	0.928767	-0.300462	0.0707753	0.272489	0.102756	0.258562	0.122298	0.18865	0.263479	0.266653	0.110633	0.0595171	0.726404	0.210132	0.211918	0.402468	0.0135292	-0.0590223	0.728592	-0.169123	0.316991	0.141315	0.404122
blue	ENSMUSG00000071604	381217	Fam189a2	family with sequence similarity 189, member A2	0.169722	0.315256	0.170168	0.313967	0.0464107	0.785036	0.310965	0.0610199	-0.015933	0.92543	0.0923282	0.586787	-0.158903	0.347534	0.186537	0.268963	-0.0598782	0.724808	0.0554086	0.744636	0.136248	0.42135	-0.178596	0.290237	0.0380794	0.822945	0.3099	0.0619577	0.167854	0.32069	0.111542	0.511019	-0.244269	0.145114
blue	ENSMUSG00000049353	74023	Rd3	retinal degeneration 3	0.276741	0.0972904	0.0996968	0.557148	-0.0626619	0.712547	0.466975	0.00357127	-0.238956	0.154344	0.294262	0.0770833	0.273018	0.102063	-0.108695	0.52193	-0.170896	0.31187	-0.0440152	0.79589	-0.0830644	0.625008	0.227739	0.175218	-0.00900637	0.957808	0.0612083	0.718941	0.190119	0.259712	0.304427	0.0669586	-0.0431181	0.799965
blue	ENSMUSG00000041323	78801	Ak7	adenylate kinase 7	-0.248093	0.138725	-0.106214	0.53153	-0.180113	0.286091	-0.577949	0.000179657	0.278428	0.0951839	-0.169057	0.317184	-0.133568	0.430629	0.147705	0.382982	0.290855	0.0807314	0.00317215	0.985134	-0.0274346	0.871951	-0.0553437	0.744926	0.133106	0.432237	0.0168672	0.921071	-0.228532	0.173679	-0.059915	0.724646	-0.012829	0.939928
blue	ENSMUSG00000104367	NA	NA	NA	0.543577	0.000507094	0.382031	0.0196309	0.243343	0.146694	0.538054	0.000592996	-0.469437	0.00337676	0.71829	5.57e-07	0.622274	3.92e-05	-0.375461	0.022024	-0.193138	0.25208	-0.209701	0.212879	-0.34107	0.0388435	0.170741	0.312317	-0.0107666	0.949572	-0.0728589	0.668256	0.0966317	0.569392	0.32713	0.0481195	0.164004	0.332072
blue	ENSMUSG00000037440	22361	Vnn1	vanin 1	0.671579	5.35e-06	0.522669	0.000904422	0.377348	0.0213131	0.638035	2.16e-05	-0.499603	0.00164269	0.496853	0.00175904	0.297442	0.073795	-0.238711	0.154779	-0.366283	0.0257696	-0.251751	0.13281	0.0486864	0.774761	0.19146	0.256303	0.0205761	0.903789	0.291001	0.0805728	0.194109	0.249657	-0.0336564	0.843238	0.120858	0.476131
blue	ENSMUSG00000048478	320869	Spata33	spermatogenesis associated 33	-0.102998	0.544098	-0.0150361	0.929617	-0.015018	0.929702	-0.180809	0.284202	-0.176107	0.29712	-0.111017	0.513023	-0.0213543	0.900168	0.105372	0.534808	0.0130672	0.938815	-0.133769	0.429927	0.0321727	0.850069	-0.182231	0.280369	0.265334	0.112475	0.216937	0.197152	-0.208949	0.214563	-0.0199722	0.9066	-0.134841	0.426207
blue	ENSMUSG00000005677	12355	Nr1i3	nuclear receptor subfamily 1, group I, member 3	0.563275	0.000283704	0.355763	0.030695	0.254549	0.128414	0.800123	2.81e-09	-0.471737	0.00320348	0.529704	0.000747519	0.566096	0.000260281	-0.439722	0.00646534	-0.579581	0.00017053	-0.416443	0.0103525	-0.238805	0.154612	-0.214095	0.203228	0.169865	0.314843	0.187745	0.26582	-0.0213403	0.900233	0.00274428	0.987139	0.102543	0.54589
blue	ENSMUSG00000097855	77779	A930007I19Rik	RIKEN cDNA A930007I19 gene	-0.0925007	0.586085	0.0724944	0.669822	-0.242909	0.147436	-0.071165	0.675542	-0.037108	0.827393	0.0629127	0.711446	0.159205	0.346607	0.00100581	0.995286	-0.157591	0.351582	0.206202	0.220787	-0.10042	0.554276	-0.300617	0.0706231	0.0229513	0.892744	-0.264212	0.11406	0.168714	0.318181	-0.00456354	0.978614	0.364211	0.0266841
blue	ENSMUSG00000045087	94226	S1pr5	sphingosine-1-phosphate receptor 5	-0.094985	0.57602	-0.19817	0.239694	-0.265996	0.111547	-0.295994	0.0752786	0.312987	0.0592707	0.389626	0.0171389	0.221422	0.187823	-0.0633107	0.709699	0.35524	0.0309588	0.100693	0.553195	-0.493045	0.00193205	-0.0291107	0.864199	-0.184411	0.274555	-0.377123	0.0213968	-0.216483	0.198113	0.210006	0.212199	-0.0615551	0.717414
blue	ENSMUSG00000015879	58227	Fam184b	family with sequence similarity 184, member B	-0.107495	0.526563	-0.018455	0.913667	-0.0700547	0.680334	-0.171467	0.310231	0.170912	0.311826	-0.173992	0.303053	-0.0430698	0.800184	0.054055	0.750674	-0.0601808	0.723472	0.0447014	0.792777	-0.0351433	0.836404	-0.259117	0.12147	0.110686	0.514287	-0.0664869	0.695815	-0.0150457	0.929572	-0.0382151	0.822324	0.115094	0.497568
blue	ENSMUSG00000091492	NA	NA	NA	0.370478	0.023997	0.19391	0.250151	0.12204	0.471797	0.447512	0.0054829	-0.169801	0.315026	0.30519	0.066243	0.242269	0.14854	-0.248286	0.138408	-0.263223	0.115471	-0.0769165	0.650925	-0.00694834	0.967443	0.144974	0.391937	-0.102921	0.544401	0.110019	0.516842	0.112248	0.50833	0.0347571	0.838178	0.174043	0.302908
blue	ENSMUSG00000047712	338362	Ust	uronyl-2-sulfotransferase	-0.481544	0.00254845	-0.142273	0.400911	-0.138205	0.41465	-0.55168	0.000401073	0.393192	0.0160638	-0.233872	0.163569	-0.475437	0.0029409	0.535533	0.000636347	0.46551	0.00369163	0.471214	0.0032422	0.199039	0.237597	-0.181976	0.281054	0.119416	0.481451	0.0927301	0.585153	0.149247	0.37798	0.0412702	0.808374	0.081668	0.630857
blue	ENSMUSG00000099041	NA	NA	NA	0.420675	0.00952578	0.135152	0.425132	0.150457	0.374081	0.478144	0.00276086	-0.34545	0.0362488	0.359185	0.0290147	0.605492	7.17e-05	-0.548138	0.000444702	-0.365031	0.0263189	-0.412174	0.0112473	-0.316695	0.0561662	0.174839	0.300669	0.16138	0.339974	-0.0572274	0.736547	-0.30702	0.0645514	0.0523459	0.758318	0.123766	0.465503
blue	ENSMUSG00000083907	NA	NA	NA	-0.310794	0.0611703	-0.145892	0.388912	-0.0889258	0.600704	-0.497852	0.00171597	0.342351	0.0380695	-0.212465	0.206772	-0.38807	0.0176263	0.388869	0.0173746	0.274649	0.0999508	0.209132	0.214151	0.340104	0.0394356	0.3205	0.0531165	0.102409	0.546417	0.190994	0.257483	0.0878152	0.605278	-0.00626277	0.970654	0.234452	0.162496
blue	ENSMUSG00000027513	18534	Pck1	phosphoenolpyruvate carboxykinase 1, cytosolic	-0.351732	0.0327763	-0.135755	0.423048	0.0139731	0.934582	-0.233729	0.163834	0.0273805	0.872202	-0.158865	0.347652	0.0020226	0.990521	0.191032	0.257388	0.0774277	0.648754	-0.0379894	0.823357	-0.0460587	0.786628	-0.318302	0.0548613	0.237748	0.156501	0.124089	0.464332	-0.0660985	0.697507	0.161817	0.338648	0.0399189	0.814538
blue	ENSMUSG00000046991	71682	Wdr27	WD repeat domain 27	0.350212	0.0335904	0.317728	0.0553246	0.130906	0.439952	0.441674	0.00620596	-0.355027	0.0310667	0.504672	0.00144591	0.456858	0.00447646	-0.184707	0.273773	-0.281495	0.0914461	-0.23428	0.162815	-0.0965302	0.569799	0.123315	0.467144	0.102549	0.545864	0.175339	0.299267	0.072398	0.670236	0.311086	0.0609141	0.031334	0.853935
blue	ENSMUSG00000085112	100415915	A530072M11Rik	RIKEN cDNA gene A530072M11	0.369639	0.0243434	0.21047	0.211169	0.212374	0.206973	0.366761	0.0255623	-0.227574	0.175539	0.483531	0.00243103	0.292511	0.0789419	-0.192821	0.252872	-0.0810199	0.63358	-0.00183027	0.991422	-0.215746	0.199683	0.154598	0.360918	-0.102919	0.544409	0.0523975	0.758087	0.289581	0.0821297	0.11507	0.497658	-0.19841	0.239113
blue	ENSMUSG00000110630	NA	NA	NA	0.042308	0.803649	-0.018989	0.91118	-0.143499	0.396824	0.288329	0.0835214	-0.0557505	0.743114	-0.042393	0.803262	-0.00126598	0.994067	0.0581987	0.732239	-0.272187	0.103152	0.102	0.548029	0.147938	0.382223	-0.0270778	0.873603	-0.177061	0.294471	0.120208	0.478524	0.185955	0.270486	0.147277	0.384378	0.0746272	0.660682
blue	ENSMUSG00000064202	381218	4430402I18Rik	RIKEN cDNA 4430402I18 gene	0.537598	0.000600639	0.438711	0.00660339	0.408474	0.0120753	0.69892	1.5e-06	-0.595865	9.98e-05	0.209809	0.212639	0.317767	0.0552931	-0.283933	0.0885547	-0.414349	0.0107836	-0.155405	0.358386	-0.0236629	0.889438	-0.0569642	0.737716	-0.118039	0.486555	0.127604	0.451674	0.261608	0.117803	0.0716771	0.673336	-0.154928	0.359883
blue	ENSMUSG00000040323	NA	NA	NA	-0.191622	0.255893	-0.0417641	0.806124	-0.0625254	0.713146	-0.291621	0.0799	0.222003	0.186638	-0.0601709	0.723516	-0.24994	0.135715	0.259487	0.12092	0.271559	0.103981	0.30882	0.0629201	0.123093	0.467955	0.133099	0.432262	0.0481856	0.777019	0.073682	0.664726	0.0225462	0.894626	0.00852286	0.960071	0.0629453	0.711303
blue	ENSMUSG00000103149	NA	NA	NA	0.0275866	0.871248	-0.0921308	0.587591	0.0735103	0.665462	-0.129078	0.446422	0.0928465	0.58468	-0.0161434	0.924448	-0.125709	0.458475	0.0707797	0.677204	0.0890785	0.600077	0.00921849	0.956815	0.158504	0.348762	0.284376	0.0880371	-0.278647	0.094914	-0.111538	0.511034	-0.0598909	0.724752	-0.0321673	0.850093	-0.0212952	0.900443
blue	ENSMUSG00000078247	104103	Airn	antisense Igf2r RNA	-0.0393169	0.817287	0.139883	0.408951	-0.0116671	0.94536	-0.205268	0.222932	0.130753	0.440491	0.0566206	0.739243	-0.256138	0.125966	0.3588	0.0291999	0.21486	0.20158	0.275179	0.0992716	0.203597	0.226804	0.00126272	0.994082	0.0657676	0.698951	0.275689	0.098621	0.250682	0.13452	-0.0146336	0.931497	0.207399	0.218059
blue	ENSMUSG00000045672	373864	Col27a1	collagen, type XXVII, alpha 1	0.415888	0.0104653	0.142428	0.400394	0.247815	0.139183	0.751393	8.37e-08	-0.227598	0.175493	0.269092	0.107287	0.294655	0.0766709	-0.274636	0.0999666	-0.501583	0.0015632	-0.411457	0.011404	0.0307852	0.856466	0.139733	0.409457	0.123238	0.467424	0.213379	0.204781	0.0393208	0.817269	0.157884	0.350676	0.136905	0.419096
blue	ENSMUSG00000023927	20230	Satb1	special AT-rich sequence binding protein 1	0.104215	0.539326	0.258396	0.122547	0.0784215	0.644541	0.29309	0.0783233	-0.329268	0.0465916	0.13721	0.41805	0.252736	0.131251	-0.237802	0.156404	-0.234908	0.161657	0.340209	0.0393706	-0.0391712	0.817952	0.159918	0.344425	-0.192785	0.252965	-0.0142114	0.933468	0.601861	8.13e-05	-0.1502	0.374907	0.0887286	0.601515
blue	ENSMUSG00000114818	NA	NA	NA	-0.12196	0.47209	-0.248481	0.13809	-0.213422	0.204687	-0.201334	0.232119	0.185023	0.272938	0.317345	0.0556356	0.172507	0.307263	-0.0255882	0.880505	0.0994559	0.558106	0.294267	0.077078	-0.172386	0.307607	-0.0149819	0.92987	-0.242494	0.148151	-0.45422	0.00474291	0.121772	0.472779	0.102733	0.54514	-0.0871868	0.607872
blue	ENSMUSG00000021306	83924	Gpr137b	G protein-coupled receptor 137B	0.208893	0.214688	-0.0110283	0.948348	0.135397	0.424284	0.242689	0.147815	-0.0690547	0.68466	0.0963537	0.570508	0.158616	0.348417	-0.165199	0.328513	-0.269983	0.106084	0.275996	0.0982309	0.0217009	0.898556	-0.0575819	0.734974	0.00275338	0.987096	0.162986	0.335124	0.245656	0.142772	-0.115777	0.495004	0.334629	0.0429305
blue	ENSMUSG00000015027	50917	Galns	galactosamine (N-acetyl)-6-sulfate sulfatase	-0.666933	6.56e-06	-0.477586	0.00279719	-0.425661	0.00862464	-0.849847	2.87e-11	0.731158	2.76e-07	-0.325324	0.0494413	-0.553483	0.000380368	0.564797	0.000270844	0.655421	1.07e-05	0.279809	0.0934861	0.129961	0.443289	-0.0874842	0.606644	0.0894663	0.598484	-0.0911667	0.591522	-0.259567	0.120802	0.132378	0.434782	-0.0634412	0.709127
blue	ENSMUSG00000030276	101100	Ttll3	tubulin tyrosine ligase-like family, member 3	-0.50353	0.00148835	-0.230389	0.170113	-0.384388	0.018827	-0.442286	0.00612649	0.352535	0.0323529	-0.149342	0.37767	-0.412945	0.0110811	0.610222	6.07e-05	0.407593	0.01228	0.417786	0.0100837	0.252721	0.131273	0.0178111	0.916669	0.121703	0.47303	0.216442	0.198202	0.149171	0.378222	0.226853	0.176949	0.0452156	0.790446
blue	ENSMUSG00000118449	NA	NA	NA	0.21085	0.210325	0.0725755	0.669473	-0.0816564	0.630906	0.404664	0.0129814	-0.429994	0.00790188	0.0592589	0.727546	0.373153	0.0229204	-0.374447	0.0224142	-0.359734	0.0287523	-0.155625	0.357697	-0.12928	0.445704	-0.0205388	0.903962	0.183561	0.276812	0.0673242	0.692171	0.155201	0.359027	-0.140747	0.406033	0.0405476	0.811668
blue	ENSMUSG00000007379	329727	Dennd2c	DENN/MADD domain containing 2C	0.0593127	0.727307	0.01042	0.951193	0.160035	0.344067	0.1536	0.364063	0.109794	0.517704	-0.136371	0.420927	-0.0195898	0.908381	-0.140454	0.407022	-0.0480098	0.777812	0.0885569	0.602222	-0.0264163	0.876667	-0.00443572	0.979213	0.0665491	0.695544	0.22669	0.177269	0.192713	0.253145	-0.0903647	0.594801	0.214773	0.201768
blue	ENSMUSG00000085151	NA	NA	NA	0.111955	0.509444	-0.0436933	0.797351	0.0990956	0.55954	0.401957	0.0136593	-0.0787439	0.643177	-0.0098895	0.953675	-0.0691657	0.68418	-0.141952	0.401987	-0.303965	0.0673946	-0.139223	0.411185	0.289896	0.0817821	0.371965	0.0233937	-0.0397377	0.815365	0.162037	0.337984	0.0457881	0.787853	-0.145205	0.391175	-0.00297774	0.986045
blue	ENSMUSG00000020427	16009	Igfbp3	insulin-like growth factor binding protein 3	0.257317	0.124171	0.262804	0.116072	0.275359	0.0990409	0.471327	0.00323376	-0.290573	0.0810395	0.0889569	0.600576	0.283433	0.0891416	-0.328149	0.0473865	-0.48103	0.00257963	-0.0745935	0.660826	0.0482448	0.776752	0.070971	0.676379	0.0360443	0.832269	0.341563	0.0385439	0.163917	0.332335	-0.112441	0.507599	0.060203	0.723374
blue	ENSMUSG00000116903	100503040	Gm19522	predicted gene, 19522	0.179968	0.286486	-0.127964	0.450386	0.0870557	0.608414	0.46394	0.00382441	-0.013408	0.937222	0.141707	0.402806	0.0783666	0.644774	-0.299024	0.0722012	-0.514387	0.00112599	-0.265385	0.112403	0.284185	0.08826	0.275044	0.0994443	0.0617927	0.716368	0.0832189	0.624362	-0.248184	0.138575	-0.261119	0.118516	0.174873	0.300574
blue	ENSMUSG00000040751	56743	Lat2	linker for activation of T cells family, member 2	0.270833	0.104945	0.280012	0.0932389	0.487919	0.00218839	0.301901	0.0693707	-0.294945	0.0763676	0.0974767	0.566004	0.124967	0.461152	-0.222899	0.18482	-0.194372	0.249003	0.0500523	0.768612	-0.0159194	0.925494	-0.0462981	0.785545	-0.214646	0.202041	0.101628	0.549498	0.0286381	0.866383	-0.12145	0.47396	0.0574033	0.735767
blue	ENSMUSG00000075020	NA	NA	NA	0.377855	0.0211254	0.347782	0.0349264	0.0201983	0.905548	0.39683	0.0150259	-0.256914	0.124783	0.508057	0.00132637	0.151373	0.371145	-0.0299598	0.860276	-0.153813	0.363392	-0.205356	0.22273	0.0660898	0.697546	-0.0535131	0.753095	0.213556	0.204396	0.366842	0.0255272	-0.000336575	0.998423	-0.027311	0.872523	0.154769	0.360382
blue	ENSMUSG00000025588	17960	Nat1	N-acetyl transferase 1	0.358315	0.0294343	0.365487	0.0261179	-0.107146	0.527914	0.413403	0.0109833	-0.402673	0.0134772	0.501499	0.00156653	0.568434	0.0002422	-0.457602	0.00440376	-0.262652	0.116292	-0.136872	0.419206	-0.365945	0.025917	0.126363	0.45612	0.0274846	0.87172	-0.134635	0.42692	0.0640132	0.70662	-0.0708534	0.676886	0.0842407	0.620098
blue	ENSMUSG00000051220	236930	Ercc6l	excision repair cross-complementing rodent repair deficiency complementation group 6 like	0.0560195	0.741916	0.149075	0.378535	0.1774	0.29353	0.159457	0.345834	-0.00956522	0.955193	0.275562	0.0987831	0.0656162	0.699612	-0.0534401	0.753422	0.0655887	0.699731	0.113197	0.50473	-0.0851253	0.616416	-0.0715902	0.673711	-0.032573	0.848225	0.22355	0.183507	0.279816	0.0934786	0.0815267	0.63145	-0.176601	0.295745
blue	ENSMUSG00000053862	330962	Slc51b	solute carrier family 51, beta subunit	-0.177182	0.294136	-0.0639298	0.706985	-0.29309	0.0783237	-0.301369	0.0698874	0.00557732	0.973865	-0.175141	0.29982	-0.0531471	0.754732	0.171623	0.309785	0.0889485	0.600611	-0.217509	0.195944	-0.0713265	0.674846	-0.258492	0.122404	0.170934	0.31176	-0.30181	0.0694585	-0.504068	0.00146821	0.0673992	0.691845	-0.11723	0.489566
blue	ENSMUSG00000050122	70853	Vwa3b	von Willebrand factor A domain containing 3B	-0.0742125	0.662455	0.0435404	0.798046	0.13184	0.436669	-0.223237	0.184137	-0.0444084	0.794106	0.199025	0.237632	0.301799	0.0694698	-0.243394	0.146606	0.109849	0.517495	0.134209	0.428397	-0.327076	0.0481586	-0.149578	0.376911	0.0841491	0.62048	-0.12262	0.469677	-0.0238987	0.888343	-0.0647548	0.703375	-0.0277518	0.870483
blue	ENSMUSG00000056812	20451	St8sia3	ST8 alpha-N-acetyl-neuraminide alpha-2,8-sialyltransferase 3	-0.171615	0.309808	-0.0834114	0.623558	-0.374583	0.0223616	-0.420291	0.00959838	0.119859	0.479813	0.309828	0.0620218	0.225138	0.180332	-0.0418171	0.805883	0.412191	0.0112437	0.230165	0.17054	-0.330534	0.0457046	0.217854	0.195219	-0.108036	0.52447	-0.291648	0.0798705	-0.0324428	0.848824	0.149435	0.377371	0.103329	0.542801
blue	ENSMUSG00000051499	330301	Zfp786	zinc finger protein 786	-0.144289	0.394201	-0.170253	0.313721	-0.339555	0.0397752	-0.359539	0.028845	0.163461	0.333698	0.0384996	0.821023	-0.269865	0.106242	0.389805	0.0170835	0.30164	0.0696239	0.119357	0.481667	-0.00507118	0.976236	-0.449434	0.00526137	0.0912514	0.591176	0.0105195	0.950727	-0.171561	0.309964	-0.0603282	0.722821	-0.0597335	0.725448
blue	ENSMUSG00000030532	68695	Hddc3	HD domain containing 3	0.117214	0.489627	0.183212	0.277742	-0.0996339	0.557398	0.040804	0.810499	-0.0784037	0.644617	0.00253415	0.988123	0.103809	0.540914	-0.0838936	0.621545	-0.116536	0.49216	-0.0425674	0.802468	-0.0180706	0.915459	0.114638	0.499284	0.154035	0.362691	-0.00884543	0.958561	-0.0476242	0.779552	0.0110316	0.948332	0.181792	0.281548
blue	ENSMUSG00000021747	74430	4930452B06Rik	RIKEN cDNA 4930452B06 gene	0.281427	0.0915271	0.228083	0.174549	0.194451	0.248807	0.346261	0.0357846	-0.344066	0.0370533	-0.0694503	0.682948	0.0836834	0.622422	-0.190583	0.258528	-0.346083	0.0358862	0.158442	0.348954	0.157906	0.350606	-0.0841943	0.620291	-0.0209211	0.902184	0.207309	0.218263	0.435822	0.0070117	-0.226255	0.178124	-0.0724798	0.669884
blue	ENSMUSG00000012428	117167	Steap4	STEAP family member 4	-0.441609	0.0062145	-0.275219	0.0992207	-0.111798	0.510042	-0.853796	1.86e-11	0.513998	0.00113748	-0.363229	0.0271268	-0.534753	0.000650313	0.462543	0.00394612	0.629556	2.99e-05	0.293259	0.0781436	0.133047	0.432445	-0.00640704	0.969979	-0.0642192	0.705718	-0.127971	0.450361	-0.147526	0.383563	-0.063249	0.70997	-0.0810967	0.633257
blue	ENSMUSG00000102649	NA	NA	NA	-0.141277	0.404249	0.0727306	0.668807	-0.164739	0.329881	-0.19572	0.245672	0.0986233	0.561422	-0.0443003	0.794596	-0.153439	0.364575	0.133452	0.431033	0.186861	0.268117	0.0421857	0.804205	0.132948	0.432788	0.269495	0.106742	0.247225	0.140157	0.27104	0.10467	0.0250352	0.88307	-0.0511222	0.763805	-0.12991	0.443469
blue	ENSMUSG00000086610	100503307	Gm15408	predicted gene 15408	0.53043	0.000732799	0.496298	0.00178336	0.217155	0.19669	0.693748	1.93e-06	-0.669585	5.84e-06	0.236745	0.158308	0.347651	0.0349997	-0.256004	0.126171	-0.440219	0.00639851	-0.213833	0.203795	-0.119674	0.480495	-0.275495	0.0988681	0.105691	0.533565	0.19282	0.252875	0.235685	0.160235	0.0160538	0.924866	-0.233296	0.164639
blue	ENSMUSG00000028024	13809	Enpep	glutamyl aminopeptidase	0.508094	0.00132511	0.358474	0.0293571	0.465046	0.00373042	0.668531	6.12e-06	-0.527219	0.000799953	-0.149011	0.378742	0.0642461	0.7056	-0.384962	0.0186354	-0.682784	3.23e-06	-0.242249	0.148574	0.3018	0.0694687	0.00668143	0.968693	0.0259103	0.879012	0.233816	0.163673	0.148255	0.381194	-0.489091	0.0021273	0.0996423	0.557364
blue	ENSMUSG00000101249	NA	NA	NA	0.350713	0.0333203	0.0544163	0.749061	0.366147	0.0258289	0.429385	0.0080001	-0.150407	0.37424	0.418818	0.00988124	0.315394	0.0572401	-0.228588	0.173571	-0.285103	0.0871928	-0.0427338	0.801712	-0.0852583	0.615864	0.18073	0.284415	-0.0574943	0.735363	0.153508	0.364356	0.106474	0.53052	0.159494	0.345722	0.172434	0.30747
blue	ENSMUSG00000108491	NA	NA	NA	0.296599	0.0746556	0.133575	0.430602	0.302112	0.0691664	0.344097	0.0370349	-0.282569	0.0901629	0.266205	0.111256	0.271416	0.104171	-0.239018	0.154233	-0.253831	0.129532	-0.241546	0.149793	-0.101802	0.548809	0.10726	0.52747	-0.10641	0.530768	-0.209364	0.213632	-0.12252	0.470041	0.0981716	0.563225	-0.0853829	0.615346
blue	ENSMUSG00000029304	20750	Spp1	secreted phosphoprotein 1	-0.00147532	0.993086	0.0774063	0.648845	0.197422	0.241508	-0.275809	0.0984688	0.0819505	0.629672	0.053983	0.750996	0.00491289	0.976978	0.0931891	0.583288	0.225905	0.178814	0.0522013	0.758966	-0.00765189	0.964149	0.0157967	0.926066	0.266479	0.110874	0.361921	0.027726	-0.0608266	0.720623	0.0463266	0.785416	0.204491	0.224725
blue	ENSMUSG00000060548	29820	Tnfrsf19	tumor necrosis factor receptor superfamily, member 19	0.573048	0.000209778	0.576261	0.000189565	0.29948	0.0717458	0.773265	2.02e-08	-0.639992	2e-05	0.242774	0.147669	0.277568	0.0962535	-0.372019	0.023372	-0.574122	0.000202819	-0.389804	0.0170838	0.141778	0.402568	0.09227	0.587024	0.144241	0.394359	0.370709	0.0239025	0.127782	0.451037	-0.275289	0.0991304	0.0436744	0.797437
blue	ENSMUSG00000022351	20775	Sqle	squalene epoxidase	-0.351543	0.0328765	-0.157371	0.352264	-0.232968	0.16525	-0.512878	0.00117114	0.100915	0.552317	-0.242735	0.147737	-0.375724	0.0219241	0.489358	0.00211359	0.522504	0.000908428	0.122513	0.470069	0.0680104	0.689189	-0.127685	0.451385	0.198683	0.238453	0.120445	0.477652	-0.108017	0.524545	0.138488	0.413686	-0.256399	0.125567
blue	ENSMUSG00000085400	NA	NA	NA	0.593518	0.000107982	0.405296	0.0128272	0.221386	0.187896	0.67852	3.92e-06	-0.521749	0.000926978	0.356368	0.0303923	0.478807	0.00271825	-0.537609	0.000600455	-0.55818	0.00033084	-0.146113	0.388188	-0.0630846	0.710691	0.180034	0.286306	-0.148475	0.380478	0.00814726	0.96183	0.19776	0.240686	-0.162678	0.336051	0.0129385	0.939416
blue	ENSMUSG00000022364	210544	Tbc1d31	TBC1 domain family, member 31	0.634306	2.49e-05	0.62707	3.28e-05	0.385673	0.0184005	0.653143	1.18e-05	-0.621036	4.11e-05	0.257677	0.123628	0.288917	0.0828659	-0.410191	0.0116849	-0.387285	0.0178768	-0.361082	0.028116	0.0438552	0.796616	0.213323	0.204903	0.148146	0.381547	0.312646	0.0595632	0.143063	0.398273	-0.175354	0.299225	-0.104489	0.538255
blue	ENSMUSG00000107655	NA	NA	NA	0.117623	0.488103	0.272124	0.103235	-0.025568	0.880598	0.348752	0.0343884	-0.314858	0.0576872	-0.0780182	0.646249	-0.0894724	0.598459	0.083121	0.624771	-0.348992	0.0342561	-0.124993	0.461058	0.330278	0.0458831	-0.0567748	0.738558	0.299894	0.0713355	0.392498	0.0162682	-0.0110387	0.948299	-0.138563	0.41343	0.157506	0.351844
blue	ENSMUSG00000028289	13841	Epha7	Eph receptor A7	0.435424	0.00706964	0.315873	0.0568427	0.33925	0.0399648	0.514932	0.00111006	-0.427138	0.00837228	0.0745749	0.660905	0.0351822	0.836226	-0.137958	0.415491	-0.566626	0.00025608	-0.331903	0.0447618	0.386875	0.0180089	0.143821	0.395755	0.201294	0.232213	0.508516	0.00131085	-0.0357485	0.833626	-0.314385	0.0580843	0.204715	0.224208
blue	ENSMUSG00000109297	NA	NA	NA	-0.202358	0.229703	-0.122082	0.471643	-0.0312764	0.8542	-0.278006	0.0957078	0.227419	0.17584	-0.183832	0.276091	-0.0225505	0.894606	-0.150726	0.373216	0.167114	0.322859	0.260129	0.11997	-0.152275	0.368268	0.0458163	0.787725	-0.202829	0.228598	-0.228044	0.174625	0.0653319	0.700853	-0.197607	0.241058	-0.129648	0.444399
blue	ENSMUSG00000030346	19362	Rad51ap1	RAD51 associated protein 1	-0.225319	0.179973	-0.0539804	0.751007	-0.0838157	0.62187	-0.262427	0.116617	0.173139	0.305466	0.0876954	0.605772	-0.110145	0.51636	0.227033	0.176595	0.341809	0.0383953	0.259954	0.120228	-0.0514493	0.762337	-0.168204	0.319669	-0.0975684	0.565637	0.0365539	0.829932	0.118192	0.485986	0.073309	0.666325	-0.00435353	0.979598
blue	ENSMUSG00000097217	NA	NA	NA	-0.13688	0.419182	-0.248473	0.138103	-0.0318547	0.851534	-0.298248	0.072979	0.286369	0.0857381	-0.452701	0.0049024	-0.460632	0.00411795	0.394539	0.0156725	0.203656	0.226665	0.00977535	0.954209	0.303275	0.0680497	0.0494334	0.771397	0.0682308	0.688232	0.108203	0.523825	-0.115131	0.497428	0.122919	0.468589	0.0185357	0.913292
blue	ENSMUSG00000070867	666048	Trabd2b	TraB domain containing 2B	0.365566	0.0260829	0.324459	0.0500855	0.377656	0.0211988	0.484792	0.00235904	-0.405832	0.0126977	0.10483	0.53692	0.0831403	0.624691	0.00583572	0.972655	-0.322128	0.0518529	-0.230144	0.17058	0.147232	0.384525	-0.115107	0.497519	0.214609	0.202121	0.490263	0.00206767	0.294251	0.0770946	0.0883471	0.603086	-0.255676	0.126674
blue	ENSMUSG00000042842	20708	Serpinb6b	serine (or cysteine) peptidase inhibitor, clade B, member 6b	0.274501	0.100141	0.305091	0.0663354	0.0807996	0.634506	0.388203	0.0175843	-0.437486	0.00677396	0.167994	0.320279	0.281491	0.0914502	-0.161536	0.339499	-0.264951	0.113014	-0.328668	0.0470161	0.0045976	0.978455	0.0233471	0.890905	0.458084	0.00435718	0.507132	0.00135812	-0.0507107	0.765653	0.00108119	0.994933	0.0636229	0.70833
blue	ENSMUSG00000020173	12808	Cobl	cordon-bleu WH2 repeat	-0.653229	1.17e-05	-0.453177	0.0048519	-0.33179	0.0448391	-0.768943	2.71e-08	0.62328	3.78e-05	-0.43278	0.00746494	-0.441841	0.00618423	0.423985	0.00891918	0.357856	0.0296579	0.113422	0.503878	0.184284	0.274891	-0.182516	0.279604	0.254761	0.128084	0.00971812	0.954477	-0.280119	0.0931091	-0.0791591	0.641422	0.157807	0.350912
blue	ENSMUSG00000028631	60613	Kcnq4	potassium voltage-gated channel, subfamily Q, member 4	0.282863	0.089815	0.229384	0.172037	0.167465	0.321828	0.50046	0.00160786	-0.330142	0.045978	0.375589	0.0219755	0.388854	0.0173793	-0.16205	0.337946	-0.225192	0.180225	-0.0645873	0.704107	-0.126008	0.457399	0.0551947	0.74559	0.156836	0.353922	0.33676	0.0415417	0.19564	0.24587	0.335334	0.0424671	0.0806223	0.635252
blue	ENSMUSG00000078920	15953	Ifi47	interferon gamma inducible protein 47	-0.439547	0.00648906	-0.223019	0.184578	-0.150297	0.374593	-0.708786	9.14e-07	0.454294	0.00473523	-0.122908	0.468626	-0.280187	0.0930254	0.33233	0.0444711	0.663261	7.69e-06	0.621798	3.99e-05	-0.0427722	0.801537	0.163321	0.33412	-0.25673	0.125062	-0.238255	0.155593	0.374644	0.0223381	0.140826	0.405768	-0.0926317	0.585553
blue	ENSMUSG00000027217	241556	Tspan18	tetraspanin 18	-0.0375637	0.825306	0.15592	0.356778	-0.186275	0.269649	0.17393	0.303228	-0.0149703	0.929924	-0.0747854	0.660006	-0.163388	0.333918	0.203892	0.226116	-0.00542597	0.974574	0.0964654	0.57006	0.0895603	0.598098	-0.248176	0.13859	0.147347	0.384149	0.306562	0.0649713	0.178243	0.291206	0.0149199	0.93016	-0.0649583	0.702485
blue	ENSMUSG00000063087	791318	Gm10125	predicted gene 10125	0.186795	0.26829	0.258129	0.122947	0.0158717	0.925716	0.280571	0.0925595	-0.199761	0.235865	0.0146511	0.931415	0.165028	0.329021	-0.225707	0.179205	-0.296374	0.074887	-0.184563	0.274152	0.0740284	0.663243	0.234875	0.161718	0.216658	0.197744	0.2238	0.183004	-0.0787563	0.643125	-0.0724939	0.669824	0.360628	0.0283289
blue	ENSMUSG00000031255	27359	Sytl4	synaptotagmin-like 4	0.630054	2.93e-05	0.504806	0.001441	0.459357	0.00423622	0.585144	0.000142453	-0.486444	0.00226749	0.514088	0.00113481	0.466333	0.00362355	-0.55682	0.000344556	-0.341598	0.038523	0.0855035	0.614845	-0.119789	0.48007	0.322182	0.0518114	-0.215146	0.200967	0.143299	0.397489	0.391024	0.0167102	-0.152581	0.367294	-0.134796	0.426362
blue	ENSMUSG00000068522	239435	Aard	alanine and arginine rich domain containing protein	0.403752	0.0132065	0.0448756	0.791987	0.234637	0.162155	0.602831	7.86e-05	-0.191244	0.25685	0.24998	0.13565	0.322411	0.0516351	-0.416386	0.010364	-0.471775	0.00320063	-0.162421	0.336825	0.00773783	0.963747	0.241902	0.149175	-0.190824	0.257915	0.029278	0.863426	0.0656134	0.699624	-0.0970699	0.567634	0.175416	0.299051
blue	ENSMUSG00000034853	329910	Acot11	acyl-CoA thioesterase 11	0.459494	0.00422331	0.314688	0.0578299	0.478206	0.00275686	0.404383	0.0130502	-0.0530616	0.755114	0.505858	0.00140301	0.311999	0.0601209	-0.306551	0.064981	-0.155573	0.35786	-0.097609	0.565474	-0.214602	0.202136	0.169833	0.314935	-0.188331	0.264302	-0.173464	0.304545	0.0936463	0.581434	0.157343	0.352351	0.023664	0.889433
blue	ENSMUSG00000046805	17476	Mpeg1	macrophage expressed gene 1	-0.299343	0.0718824	-0.108188	0.523886	-0.0738461	0.664024	-0.616765	4.8e-05	0.257054	0.12457	-0.100898	0.552381	0.00562165	0.973657	-0.0449729	0.791546	0.35773	0.0297196	0.540711	0.000550175	-0.24446	0.14479	-0.0813563	0.632166	-0.25902	0.121615	-0.424537	0.00882129	0.196867	0.242861	-0.17703	0.294557	0.0787291	0.64324
blue	ENSMUSG00000028476	53614	Reck	reversion-inducing-cysteine-rich protein with kazal motifs	0.56362	0.000280742	0.360948	0.0281789	0.314387	0.0580827	0.74539	1.21e-07	-0.652175	1.22e-05	0.164316	0.331141	0.438452	0.00663911	-0.50692	0.0013655	-0.499991	0.00162688	-0.236801	0.158206	-0.103338	0.542765	0.179082	0.288905	-0.0560997	0.741559	0.0502229	0.767845	0.213685	0.204116	-0.0103835	0.951364	-0.14943	0.377388
blue	ENSMUSG00000021569	69716	Trip13	thyroid hormone receptor interactor 13	0.326559	0.0485343	0.212284	0.207168	0.173613	0.304124	0.255728	0.126594	-0.199846	0.235662	0.351876	0.0327002	0.262553	0.116435	-0.395539	0.0153875	-0.022269	0.895915	-0.155499	0.358092	-0.188692	0.26337	0.230421	0.170052	-0.116549	0.49211	0.0966109	0.569475	0.0139287	0.934789	-0.159716	0.345041	-0.0527917	0.756322
blue	ENSMUSG00000027950	11444	Chrnb2	cholinergic receptor, nicotinic, beta polypeptide 2 (neuronal)	0.599378	8.85e-05	0.390062	0.0170042	0.196155	0.244602	0.816609	7.17e-10	-0.672065	5.24e-06	0.422605	0.00916798	0.606132	7.01e-05	-0.493934	0.00189035	-0.67909	3.82e-06	-0.497224	0.00174291	-0.118671	0.48421	0.0596129	0.725981	0.20384	0.226237	0.21593	0.199291	-0.0151361	0.92915	-0.00950955	0.955453	0.254798	0.128027
blue	ENSMUSG00000042248	13096	Cyp2c37	cytochrome P450, family 2. subfamily c, polypeptide 37	0.0176536	0.917404	-0.200165	0.234899	0.0756965	0.656117	0.4049	0.0129236	0.0751153	0.658597	-0.120177	0.478639	-0.250237	0.135236	0.0487156	0.774629	-0.277199	0.0967149	0.0848145	0.617709	0.391423	0.0165896	0.194108	0.24966	-0.200872	0.233215	0.0826052	0.626929	0.279561	0.0937896	-0.174524	0.301554	0.0977965	0.564724
blue	ENSMUSG00000070282	NA	NA	NA	-0.701853	1.3e-06	-0.497762	0.0017198	-0.475209	0.00295654	-0.683122	3.18e-06	0.626883	3.3e-05	-0.443495	0.0059721	-0.657033	1e-05	0.674414	4.72e-06	0.434998	0.00713213	0.337864	0.0408363	0.298037	0.0731926	-0.319086	0.0542342	9.75e-05	0.999543	-0.161748	0.338858	-0.113633	0.503079	-0.0663567	0.696382	0.0904147	0.594597
blue	ENSMUSG00000086714	NA	NA	NA	-0.255557	0.126856	-0.0664643	0.695913	-0.116852	0.490981	-0.371985	0.0233855	0.176277	0.296649	-0.297953	0.0732776	-0.28698	0.0850417	0.418342	0.00997429	0.132559	0.43415	0.182748	0.278981	0.173814	0.303555	-0.0795918	0.639595	0.17266	0.306827	0.176595	0.295762	-0.0475897	0.779708	0.115355	0.496589	0.373386	0.0228285
blue	ENSMUSG00000117037	NA	NA	NA	0.127369	0.452514	0.158069	0.350103	-0.0114732	0.946267	0.227201	0.176267	-0.237405	0.157117	0.0305349	0.857621	-0.112408	0.507723	0.291357	0.0801858	-0.0498681	0.76944	0.00572114	0.973191	0.199803	0.235763	-0.16417	0.331576	0.0817523	0.630504	0.363854	0.0268445	0.307753	0.0638825	0.145535	0.390086	-0.0590193	0.728605
blue	ENSMUSG00000057093	112415	Zfp607b	zinc finger protein 607B	0.179204	0.28857	0.0581587	0.732416	0.0786299	0.643659	0.183828	0.276103	0.0260307	0.878454	0.106767	0.52938	0.00594325	0.972151	-0.0799381	0.638134	-0.0144133	0.932525	0.18154	0.282227	0.06603	0.697806	0.18591	0.270606	-0.175158	0.299774	0.0837263	0.622243	0.126905	0.454177	0.010743	0.949682	0.105424	0.534604
blue	ENSMUSG00000085642	NA	NA	NA	0.297311	0.0739283	0.156151	0.356055	0.157102	0.353098	0.320316	0.0532611	-0.154287	0.361896	0.361673	0.0278406	0.329597	0.0463595	-0.264722	0.113338	-0.00195653	0.99083	-0.0419268	0.805384	-0.278556	0.095026	0.0616867	0.716835	0.137216	0.41803	0.226681	0.177286	-0.0119716	0.943936	0.167272	0.322394	0.220158	0.190419
blue	ENSMUSG00000037239	101809	Spred3	sprouty-related EVH1 domain containing 3	0.4541	0.00475527	0.348325	0.0346244	0.205363	0.222713	0.352382	0.0324332	-0.234331	0.16272	0.354649	0.0312591	0.369358	0.02446	-0.321765	0.052132	-0.231932	0.167192	-0.0764245	0.653017	-0.239884	0.152702	-0.0689481	0.685122	-0.108847	0.521345	-0.0384707	0.821155	0.138753	0.412783	0.0562019	0.741105	0.108734	0.521779
blue	ENSMUSG00000078597	13118	Cyp4a12b	cytochrome P450, family 4, subfamily a, polypeptide 12B	0.415936	0.0104555	0.132879	0.433029	0.295513	0.0757766	0.433521	0.00735229	-0.132775	0.433394	0.601864	8.13e-05	0.363841	0.0268501	-0.381642	0.0197664	-0.0909043	0.592594	0.0213317	0.900273	-0.191349	0.256583	0.373373	0.0228337	-0.313496	0.0588367	-0.0646059	0.704026	0.193586	0.250959	0.124134	0.464167	-0.0916912	0.589382
blue	ENSMUSG00000026688	66447	Mgst3	microsomal glutathione S-transferase 3	0.4862	0.00228078	0.425864	0.00858971	0.251158	0.133756	0.717817	5.71e-07	-0.576279	0.000189456	0.205974	0.221309	0.145713	0.389501	-0.0462864	0.785598	-0.401657	0.0137362	-0.184011	0.275617	0.155878	0.356908	-0.0239971	0.887887	0.0645753	0.70416	0.328618	0.047052	0.261223	0.118364	0.129887	0.443552	-0.105049	0.536067
blue	ENSMUSG00000035232	236900	Pdk3	pyruvate dehydrogenase kinase, isoenzyme 3	-0.0350197	0.836972	0.248436	0.138162	0.135848	0.422728	-0.148299	0.381051	0.0963375	0.570574	0.112949	0.505671	-0.157356	0.352311	0.210899	0.210216	0.282782	0.0899113	0.157879	0.350692	0.0268311	0.874745	-0.0715335	0.673955	0.275444	0.0989335	0.315647	0.0570302	0.204784	0.224047	0.0445604	0.793416	-0.0595614	0.726208
blue	ENSMUSG00000109877	NA	NA	NA	0.447911	0.00543627	0.276095	0.0981053	0.185664	0.27125	0.667395	6.43e-06	-0.533547	0.000672448	0.478633	0.00272941	0.640436	1.96e-05	-0.513147	0.001163	-0.616899	4.78e-05	-0.336088	0.0419752	-0.12722	0.453047	0.0995482	0.557738	0.0496362	0.770484	0.0297716	0.861145	0.142169	0.401259	-0.000360338	0.998311	0.266473	0.110883
blue	ENSMUSG00000003053	13095	Cyp2c29	cytochrome P450, family 2, subfamily c, polypeptide 29	0.514019	0.00113685	0.304753	0.0666519	0.468257	0.0034688	0.728252	3.24e-07	-0.444567	0.00583806	0.190003	0.260007	0.178698	0.289957	-0.381671	0.019756	-0.437021	0.00683974	-0.0444548	0.793895	0.0973536	0.566497	0.211332	0.209261	-0.309833	0.0620169	0.00484921	0.977276	0.342893	0.0377456	-0.156764	0.354145	-0.100133	0.555414
blue	ENSMUSG00000078496	195531	Zfp982	zinc finger protein 982	0.234414	0.162567	0.0559304	0.742313	0.199564	0.236336	0.362704	0.027366	0.139164	0.411385	0.154781	0.360344	-0.111211	0.512281	-0.0741312	0.662803	-0.105491	0.534343	-0.0291062	0.864219	0.141917	0.402102	0.156927	0.353639	-0.0302228	0.859061	0.150302	0.374577	0.0287611	0.865815	-0.114196	0.50095	0.277799	0.0959649
blue	ENSMUSG00000097253	NA	NA	NA	0.0147077	0.931151	0.1142	0.500935	-0.0559113	0.742398	-0.127108	0.45345	-0.104306	0.538971	0.0751648	0.658385	0.092591	0.585718	-0.0847944	0.617793	0.139954	0.40871	-0.0584316	0.731207	-0.208987	0.214476	-0.0648652	0.702892	-0.01565	0.926751	-0.0515024	0.762099	-0.141935	0.402042	-0.091851	0.58873	-0.2244	0.181803
blue	ENSMUSG00000085595	102633478	Gm16090	predicted gene 16090	0.334752	0.042849	0.139494	0.410267	0.206443	0.220237	0.418348	0.00997312	-0.114516	0.499744	0.204275	0.225227	0.252742	0.131241	-0.265227	0.112625	-0.262849	0.116008	-0.084313	0.619797	-0.100981	0.552055	0.118586	0.484523	0.0759839	0.654893	0.0570687	0.737252	0.0866744	0.609991	0.0577468	0.734243	0.364513	0.0265493
blue	ENSMUSG00000100975	NA	NA	NA	0.499868	0.00163188	0.323487	0.0508163	0.330099	0.0460077	0.526811	0.000808859	-0.49703	0.00175132	0.349035	0.0342321	0.386382	0.0181686	-0.360606	0.0283395	-0.237633	0.156708	-0.0770455	0.650377	-0.142439	0.400356	0.264324	0.113901	-0.308792	0.0629451	-0.0175824	0.917735	0.252353	0.131856	0.0859059	0.613175	-0.252762	0.13121
blue	ENSMUSG00000020389	213084	Cdkl3	cyclin-dependent kinase-like 3	0.146617	0.386534	0.0915224	0.59007	0.279048	0.0944186	0.276357	0.0977747	-0.0727801	0.668594	0.0792733	0.64094	-0.0104732	0.950944	0.0131105	0.938612	-0.216852	0.197333	-0.221858	0.186932	0.180535	0.284944	0.157077	0.353173	0.196855	0.24289	0.276143	0.0980445	-0.0421534	0.804352	0.00597686	0.971993	0.241711	0.149506
blue	ENSMUSG00000095990	22759	Zfp97	zinc finger protein 97	0.245461	0.1431	0.0124785	0.941566	0.195733	0.24564	0.410371	0.0116446	-0.3594	0.0289116	-0.0324698	0.8487	0.328355	0.0472388	-0.391643	0.0165235	-0.415383	0.0105689	-0.178288	0.291083	-0.189272	0.261881	-0.170528	0.312928	0.0524027	0.758064	0.0605588	0.721804	0.0566558	0.739087	-0.196915	0.242745	0.11019	0.516187
blue	ENSMUSG00000027160	68201	Ccdc34	coiled-coil domain containing 34	0.209905	0.212425	0.10539	0.534734	0.134756	0.426503	0.180348	0.285452	0.00650165	0.969535	0.259635	0.1207	0.205362	0.222715	-0.183528	0.2769	-0.177772	0.292505	0.0929187	0.584387	-0.0117274	0.945078	0.235888	0.159865	-0.143807	0.395799	0.0503253	0.767385	0.189398	0.261556	0.103212	0.54326	0.0292468	0.86357
blue	ENSMUSG00000040612	100039795	Ildr2	immunoglobulin-like domain containing receptor 2	-0.130299	0.442093	-0.123348	0.467026	0.0677045	0.690518	-0.392012	0.0164129	0.21245	0.206805	-0.0672714	0.6924	-0.220194	0.190346	0.266835	0.110381	0.254458	0.128555	0.212845	0.205944	0.018179	0.914954	-0.19894	0.237834	0.0234796	0.89029	-0.0261237	0.878023	-0.0589888	0.72874	-0.0679387	0.6895	0.199644	0.236144
blue	ENSMUSG00000110663	NA	NA	NA	-0.443944	0.00591564	-0.385321	0.0185165	-0.289399	0.0823311	-0.714317	6.87e-07	0.659193	9.14e-06	-0.0967329	0.568985	-0.343141	0.0375988	0.259653	0.120673	0.564538	0.000272998	0.197241	0.241948	0.00598313	0.971964	0.0313247	0.853977	0.0145803	0.931745	-0.0429429	0.800761	-0.362126	0.0276313	-0.0847543	0.617959	0.1814	0.282605
blue	ENSMUSG00000108207	NA	NA	NA	0.482074	0.00251664	0.303352	0.067977	0.212901	0.205821	0.70146	1.32e-06	-0.6001	8.64e-05	0.38611	0.0182574	0.7485	1e-07	-0.492541	0.00195601	-0.479352	0.00268366	-0.228662	0.173428	-0.483195	0.00245055	-0.231186	0.1686	0.168846	0.317797	-0.0235553	0.889938	0.141855	0.402312	0.278448	0.0951597	0.0863411	0.611371
blue	ENSMUSG00000106927	NA	NA	NA	0.505953	0.00139962	0.267741	0.109131	0.409245	0.0118986	0.680863	3.53e-06	-0.415183	0.01061	0.281919	0.0909376	0.516875	0.00105488	-0.486903	0.00224263	-0.517542	0.00103649	-0.417736	0.0100936	-0.22311	0.184393	-0.0795317	0.639849	0.165862	0.32655	0.114299	0.500562	-0.10633	0.531078	-0.00662618	0.968952	0.174076	0.302817
blue	ENSMUSG00000086212	100503869	Mkln1os	muskelin 1, intracellular mediator containing kelch motifs, opposite strand	0.433818	0.0073076	0.17535	0.299237	0.0233899	0.890706	0.420041	0.00964588	-0.386586	0.0181024	0.288149	0.0837228	0.497305	0.00173942	-0.513198	0.00116146	-0.336779	0.0415295	-0.459707	0.0042034	-0.232387	0.166336	0.15248	0.367614	-0.026894	0.874454	-0.0600391	0.724098	-0.295018	0.0762915	-0.0714458	0.674333	0.16122	0.340459
blue	ENSMUSG00000092274	66961	Neat1	nuclear paraspeckle assembly transcript 1 (non-protein coding)	-0.314253	0.0581961	-0.31648	0.0563424	-0.322	0.0519514	-0.542609	0.000521294	0.476813	0.00284812	0.0545629	0.748407	-0.265557	0.112162	0.295266	0.0760329	0.496232	0.00178628	0.481262	0.00256548	0.127675	0.451417	0.441744	0.00619683	-0.286819	0.0852253	-0.253591	0.129907	0.152181	0.368568	0.136941	0.418972	0.0378192	0.824136
blue	ENSMUSG00000097124	NA	NA	NA	0.725501	3.77e-07	0.471967	0.00318658	0.468508	0.00344908	0.734902	2.23e-07	-0.430264	0.00785859	0.616024	4.93e-05	0.583481	0.000150373	-0.640217	1.98e-05	-0.351448	0.0329271	-0.209658	0.212976	-0.257039	0.124593	0.282676	0.0900361	-0.121253	0.47468	0.0775952	0.648043	0.166059	0.325967	-0.0165393	0.922601	0.0182121	0.9148
blue	ENSMUSG00000020553	18559	Pctp	phosphatidylcholine transfer protein	0.654984	1.09e-05	0.508083	0.00132548	0.238782	0.154654	0.866517	4.2e-12	-0.691816	2.11e-06	0.596246	9.85e-05	0.558564	0.000327062	-0.458562	0.00431134	-0.529989	0.000741712	-0.256496	0.125419	-0.153546	0.364235	0.0780949	0.645925	0.00134462	0.993698	0.158967	0.34734	0.242843	0.147551	-0.0187223	0.912422	-0.0401193	0.813623
blue	ENSMUSG00000032500	245038	Dclk3	doublecortin-like kinase 3	0.486524	0.00226314	0.336133	0.0419465	0.213848	0.203764	0.738794	1.78e-07	-0.634174	2.5e-05	0.286219	0.0859089	0.635547	2.37e-05	-0.559084	0.000322003	-0.446196	0.00563918	-0.373302	0.0228617	-0.427498	0.00831169	-0.129237	0.445856	0.125254	0.460115	0.019933	0.906783	0.0112406	0.947355	0.0718221	0.672712	-0.142786	0.399198
blue	ENSMUSG00000028133	66568	Rwdd3	RWD domain containing 3	0.645522	1.6e-05	0.405622	0.0127482	0.331157	0.0452739	0.780033	1.26e-08	-0.640946	1.92e-05	0.54144	0.000538925	0.80746	1.55e-09	-0.752842	7.66e-08	-0.570404	0.000227848	-0.273728	0.101139	-0.382616	0.0194289	0.158915	0.347498	0.014172	0.933653	-0.0213972	0.899969	0.101099	0.551589	0.00693786	0.967493	0.152046	0.368997
blue	ENSMUSG00000100865	NA	NA	NA	-0.0544538	0.748894	-0.190341	0.259145	-0.0441362	0.795341	0.290762	0.0808324	-0.173319	0.304957	-0.0937665	0.580947	0.251993	0.132425	-0.157707	0.351223	-0.407013	0.0124162	-0.162182	0.337546	-0.147952	0.382179	-0.502482	0.00152825	0.209004	0.21444	-0.047318	0.780935	-0.0836949	0.622374	-0.0232859	0.891189	0.22593	0.178764
blue	ENSMUSG00000025648	270198	Pfkfb4	6-phosphofructo-2-kinase/fructose-2,6-biphosphatase 4	-0.16075	0.341888	0.0591296	0.728117	-0.084558	0.618776	-0.531146	0.000718535	0.264788	0.113244	-0.0909132	0.592558	-0.401165	0.0138633	0.624607	3.6e-05	0.613365	5.43e-05	0.170262	0.313697	0.0835843	0.622836	-0.108047	0.524428	0.382444	0.019488	0.446984	0.00554511	-0.0453915	0.789649	0.348244	0.0346691	0.0773916	0.648907
blue	ENSMUSG00000037031	70423	Tspan15	tetraspanin 15	-0.455752	0.00458659	-0.196829	0.242953	-0.423083	0.00908105	-0.48423	0.0023909	0.0760436	0.654638	-0.0825431	0.627189	-0.0636639	0.708151	0.359218	0.0289986	0.480209	0.00263008	0.447108	0.00553044	-0.176982	0.294689	-0.155797	0.357162	0.0519309	0.760178	0.0339116	0.842064	0.134275	0.428169	0.321899	0.0520291	-0.181249	0.283011
blue	ENSMUSG00000056966	118446	Gjc3	gap junction protein, gamma 3	-0.525346	0.000841575	-0.219994	0.190758	-0.430521	0.00781759	-0.739069	1.75e-07	0.489689	0.00209669	-0.0727559	0.668698	-0.287128	0.084874	0.494953	0.00184356	0.657463	9.82e-06	0.130748	0.44051	-0.122003	0.471933	-0.217557	0.195843	0.217745	0.195448	-0.0184821	0.913541	-0.250856	0.13424	0.218786	0.193266	0.101877	0.548514
blue	ENSMUSG00000026271	64095	Gpr35	G protein-coupled receptor 35	-0.104665	0.537566	-0.258797	0.121947	-0.123629	0.466003	-0.31008	0.0617982	0.232056	0.166958	-0.179791	0.286969	-0.139377	0.410664	0.131771	0.436911	0.0923544	0.58668	0.408334	0.0121076	0.119541	0.480987	0.0707212	0.677456	-0.23386	0.163592	-0.0203234	0.904965	0.298879	0.0723454	-0.022308	0.895733	0.234665	0.162104
[truncated: 3,963 more rows]
