# Supplementary material for: Gut Microbiome Variation Modulates the Effects of Dietary Fiber on Host Metabolism
Source: Research Square preprint supplement (doi:10.21203/rs.3.rs-97357/v1), 2020-10-28
Supplement: Supplementary file 2 [file eead80c422999e72946767f2.xlsx]

## Sheet: Sheet1
Table S6. WGCNA assignment of metabolites into modules. Metabolites (biochemicals) contained in the blue and turquoise modules by subject and super pathway. The fourth to seventh column shows the fold change of SubB compared to SubA within each fiber dietary intervention, the last two columns shows metabolite significance (MS) which reports the association of each metabolite with each phenotype a…
Module	SUPER PATHWAY	SUB-PATHWAY	BIOCHEMICAL	SubB/SubA Cellulose	SubB/SubA Inulin	SubB/SubA Pectin	SubB/SubA Assorted F	MS FM%	p.MS FM%
Turquoise	Lipid	Sphingomyelins	sphingomyelin (d18:2/21:0, d16:2/23:0)*	0.77	0.83	1.48	0.78	0.764782	9.62e-10
Turquoise	Lipid	Phosphatidylcholine (PC)	1-palmitoyl-2-dihomo-linolenoyl-GPC (16:0/20:3n3 or 6)*	0.89	0.87	1.34	0.92	0.734274	9.45e-09
Turquoise	Lipid	Sphingomyelins	sphingomyelin (d18:1/22:2, d18:2/22:1, d16:1/24:2)*	0.78	0.97	1.69	0.86	0.73	1.27e-08
Turquoise	Lipid	Sphingomyelins	sphingomyelin (d18:1/22:1, d18:2/22:0, d16:1/24:1)*	0.95	0.92	1.61	0.93	0.7233	1.99e-08
Turquoise	Lipid	Sphingomyelins	sphingomyelin (d18:2/18:1)*	0.87	0.93	1.3	0.91	0.703935	6.87e-08
Turquoise	Lipid	Sphingomyelins	sphingomyelin (d18:2/14:0, d18:1/14:1)*	0.79	0.94	1.73	0.79	0.690185	1.56e-07
Turquoise	Lipid	Phosphatidylinositol (PI)	1-stearoyl-2-arachidonoyl-GPI (18:0/20:4)	0.91	0.96	1	0.87	0.689834	1.59e-07
Turquoise	Lipid	Sphingomyelins	sphingomyelin (d18:1/20:1, d18:2/20:0)*	0.8	1.02	1.39	0.82	0.686847	1.89e-07
Turquoise	Lipid	Phosphatidylcholine (PC)	1-linoleoyl-2-arachidonoyl-GPC (18:2/20:4n6)*	0.8	0.9	1.46	0.89	0.674866	3.69e-07
Turquoise	Lipid	Phosphatidylcholine (PC)	1-oleoyl-2-docosahexaenoyl-GPC (18:1/22:6)*	0.78	0.99	1.36	0.93	0.667707	5.43e-07
Turquoise	Lipid	Sphingomyelins	sphingomyelin (d18:2/16:0, d18:1/16:1)*	0.87	0.94	1.31	0.91	0.648419	1.46e-06
Turquoise	Lipid	Sphingomyelins	sphingomyelin (d18:1/20:0, d16:1/22:0)*	0.86	1.01	1.39	0.91	0.640983	2.1e-06
Turquoise	Lipid	Phosphatidylcholine (PC)	1-palmitoyl-2-docosahexaenoyl-GPC (16:0/22:6)	0.9	1.03	1.21	0.95	0.633899	2.94e-06
Turquoise	Lipid	Hexosylceramides (HCER)	glycosyl ceramide (d18:1/20:0, d16:1/22:0)*	0.75	0.97	1.4	0.71	0.629409	3.63e-06
Turquoise	Lipid	Sphingomyelins	sphingomyelin (d18:1/19:0, d19:1/18:0)*	0.7	1.05	1.2	0.79	0.62805	3.87e-06
Turquoise	Lipid	Sphingomyelins	sphingomyelin (d18:2/23:0, d18:1/23:1, d17:1/24:1)*	0.85	0.94	1.23	0.96	0.621107	5.3e-06
Turquoise	Lipid	Sphingomyelins	sphingomyelin (d18:1/21:0, d17:1/22:0, d16:1/23:0)*	1.03	0.89	1.27	0.92	0.612933	7.61e-06
Turquoise	Lipid	Sphingomyelins	sphingomyelin (d18:1/18:1, d18:2/18:0)	0.87	1.01	1.12	0.92	0.612866	7.64e-06
Turquoise	Cofactors and Vitamins	Tocopherol Metabolism	alpha-tocopherol	0.93	0.85	1.04	0.95	0.610452	8.48e-06
Turquoise	Lipid	Phosphatidylcholine (PC)	1-myristoyl-2-arachidonoyl-GPC (14:0/20:4)*	0.78	0.91	1.64	0.89	0.600765	1.28e-05
Turquoise	Cofactors and Vitamins	Vitamin A Metabolism	retinol (Vitamin A)	0.88	0.87	1.06	0.89	0.600043	1.32e-05
Turquoise	Lipid	Sphingomyelins	sphingomyelin (d18:1/14:0, d16:1/16:0)*	0.86	0.96	1.46	0.89	0.599194	1.37e-05
Turquoise	Lipid	Lysophospholipid	1-arachidonoyl-GPC (20:4n6)*	0.79	0.97	1.32	0.86	0.598671	1.4e-05
Turquoise	Lipid	Phosphatidylcholine (PC)	1-stearoyl-2-docosahexaenoyl-GPC (18:0/22:6)	0.92	0.96	1.14	0.92	0.596114	1.55e-05
Turquoise	Lipid	Phosphatidylcholine (PC)	1-palmitoyl-2-arachidonoyl-GPC (16:0/20:4n6)	0.86	1.01	1.26	0.94	0.5959	1.57e-05
Turquoise	Lipid	Phosphatidylinositol (PI)	1-palmitoyl-2-arachidonoyl-GPI (16:0/20:4)*	1.1	0.9	0.98	0.89	0.590055	1.99e-05
Turquoise	Lipid	Sterol	campesterol	0.62	0.56	3.41	0.82	0.589126	2.07e-05
Turquoise	Lipid	Sphingomyelins	sphingomyelin (d18:2/23:1)*	0.76	1.1	1.2	0.97	0.584271	2.51e-05
Turquoise	Lipid	Lysophospholipid	1-stearoyl-GPC (18:0)	1.02	0.97	1.18	0.9	0.581103	2.85e-05
Turquoise	Lipid	Lysophospholipid	1-palmitoleoyl-GPC* (16:1)*	0.96	0.84	1.31	0.93	0.57095	4.21e-05
Turquoise	Lipid	Phosphatidylcholine (PC)	1-stearoyl-2-arachidonoyl-GPC (18:0/20:4)	0.8	1.02	1.24	0.88	0.56682	4.92e-05
Turquoise	Lipid	Endocannabinoid	stearoyl ethanolamide	1.04	0.78	1.3	0.88	0.551401	8.65e-05
Turquoise	Lipid	Phosphatidylcholine (PC)	1-palmitoyl-2-palmitoleoyl-GPC (16:0/16:1)*	0.87	0.82	1.61	0.9	0.542908	0.00011658
Turquoise	Lipid	Hexosylceramides (HCER)	glycosyl ceramide (d16:1/24:1, d18:1/22:1)*	0.79	0.73	1.63	0.47	0.540219	0.00012794
Turquoise	Lipid	Hexosylceramides (HCER)	glycosyl-N-stearoyl-sphingosine (d18:1/18:0)	0.59	1.14	1.25	0.74	0.539592	0.00013073
Turquoise	Lipid	Hexosylceramides (HCER)	glycosyl-N-behenoyl-sphingadienine (d18:2/22:0)*	1.03	0.73	1.36	0.68	0.538982	0.00013349
Turquoise	Lipid	Lysophospholipid	1-arachidonoyl-GPI* (20:4)*	0.87	0.9	1.26	0.89	0.534362	0.00015623
Turquoise	Nucleotide	Purine Metabolism, (Hypo)Xanthine/Inosine containing	inosine	0.75	0.89	1.11	0.92	0.53145	0.00017231
Turquoise	Lipid	Ceramides	ceramide (d18:2/24:1, d18:1/24:2)*	0.79	1.09	1.42	1.02	0.531076	0.00017448
Turquoise	Lipid	Phosphatidylcholine (PC)	1-palmitoyl-2-oleoyl-GPC (16:0/18:1)	0.96	0.93	1.25	1	0.528224	0.00019187
Turquoise	Cofactors and Vitamins	Ascorbate and Aldarate Metabolism	ascorbic acid 3-sulfate*	0.91	0.79	1.07	0.96	0.514461	0.00029992
Turquoise	Lipid	Sphingomyelins	palmitoyl sphingomyelin (d18:1/16:0)	0.93	1	1.14	0.94	0.506729	0.00038232
Turquoise	Lipid	Sphingomyelins	sphingomyelin (d17:1/16:0, d18:1/15:0, d16:1/17:0)*	0.82	0.98	1.01	0.81	0.506404	0.0003862
Turquoise	Lipid	Sphingomyelins	sphingomyelin (d18:2/24:1, d18:1/24:2)*	0.82	1.18	1.36	1.02	0.499154	0.0004823
Turquoise	Lipid	Lysophospholipid	1-arachidonoyl-GPE (20:4n6)*	0.91	0.95	0.99	0.88	0.499084	0.00048333
Turquoise	Xenobiotics	Chemical	perfluorooctanesulfonate (PFOS)	0.93	1.03	0.88	0.73	0.495268	0.00054223
Turquoise	Lipid	Phosphatidylcholine (PC)	1-stearoyl-2-oleoyl-GPC (18:0/18:1)	0.99	0.94	1.22	0.95	0.488486	0.00066297
Turquoise	Cofactors and Vitamins	Ascorbate and Aldarate Metabolism	ascorbic acid 2-sulfate	0.83	0.8	1.12	0.89	0.47734	0.00091446
Turquoise	Lipid	Lysophospholipid	1-oleoyl-GPC (18:1)	0.95	1.73	0.68	0.87	0.470195	0.00111751
Turquoise	Lipid	Lysophospholipid	2-palmitoleoyl-GPC* (16:1)*	1.01	0.68	1.2	0.9	0.46936	0.00114368
Turquoise	Lipid	Phosphatidylcholine (PC)	1-palmitoyl-2-stearoyl-GPC (16:0/18:0)	0.89	1.17	1.4	0.94	0.468304	0.00117755
Turquoise	Lipid	Phosphatidylcholine (PC)	1-palmitoleoyl-2-linoleoyl-GPC (16:1/18:2)*	0.91	0.91	1.42	1.03	0.460247	0.00146696
Turquoise	Lipid	Sphingomyelins	sphingomyelin (d18:1/17:0, d17:1/18:0, d19:1/16:0)	0.75	1.16	0.95	0.79	0.44718	0.00207188
Turquoise	Lipid	Sphingomyelins	stearoyl sphingomyelin (d18:1/18:0)	0.81	1.2	1.06	0.92	0.443916	0.00225378
Turquoise	Lipid	Lysophospholipid	2-palmitoyl-GPC* (16:0)*	1.07	0.96	0.98	0.95	0.438034	0.00261747
Turquoise	Lipid	Lysophospholipid	1-lignoceroyl-GPC (24:0)	0.96	1.2	1.22	0.97	0.436165	0.00274339
Turquoise	Lipid	Ceramides	N-palmitoyl-sphingosine (d18:1/16:0)	0.91	1.17	1.03	0.88	0.42822	0.00334027
Turquoise	Lipid	Dihydrosphingomyelins	behenoyl dihydrosphingomyelin (d18:0/22:0)*	0.97	0.86	1.56	0.98	0.419817	0.00409277
Turquoise	Lipid	Sphingomyelins	sphingomyelin (d18:1/24:1, d18:2/24:0)*	0.86	1.21	1.3	1.06	0.418953	0.00417796
Turquoise	Lipid	Lysoplasmalogen	1-(1-enyl-palmitoyl)-GPC (P-16:0)*	1.02	1.1	1.31	0.91	0.418227	0.00425076
Turquoise	Lipid	Plasmalogen	1-(1-enyl-palmitoyl)-2-arachidonoyl-GPC (P-16:0/20:4)*	0.88	1.23	0.96	0.92	0.41736	0.00433916
Turquoise	Lipid	Fatty Acid Synthesis	malonylcarnitine	0.92	1.01	1	0.86	0.411935	0.00492947
Turquoise	Lipid	Hexosylceramides (HCER)	glycosyl-N-palmitoyl-sphingosine (d18:1/16:0)	0.88	1	1.1	0.93	0.401493	0.00626511
Turquoise	Lipid	Dihydrosphingomyelins	sphingomyelin (d18:0/18:0, d19:0/17:0)*	0.87	1.19	1.45	0.93	0.398553	0.00669382
Turquoise	Lipid	Sphingomyelins	tricosanoyl sphingomyelin (d18:1/23:0)*	0.86	0.91	1.23	1.03	0.398394	0.00671769
Turquoise	Lipid	Plasmalogen	1-(1-enyl-palmitoyl)-2-palmitoyl-GPC (P-16:0/16:0)*	0.9	1.21	1.24	0.98	0.393397	0.00750707
Turquoise	Lipid	Sphingomyelins	behenoyl sphingomyelin (d18:1/22:0)*	1.15	0.99	1.43	1.04	0.382532	0.00950454
Turquoise	Lipid	Sphingolipid Synthesis	sphinganine-1-phosphate	1.02	0.89	0.99	0.93	0.381825	0.00964886
Turquoise	Lipid	Phosphatidylcholine (PC)	1,2-dipalmitoyl-GPC (16:0/16:0)	0.84	1.33	1.36	0.96	0.373805	0.0114246
Turquoise	Lipid	Hexosylceramides (HCER)	glycosyl ceramide (d18:2/24:1, d18:1/24:2)*	0.89	1.11	1.03	0.98	0.373424	0.0115157
Turquoise	Lipid	Plasmalogen	1-(1-enyl-palmitoyl)-2-oleoyl-GPC (P-16:0/18:1)*	0.9	1.24	1.15	1.03	0.365484	0.0135557
Turquoise	Lipid	Phosphatidylcholine (PC)	1-myristoyl-2-palmitoyl-GPC (14:0/16:0)	0.91	1.1	1.28	0.99	0.353489	0.017218
Turquoise	Lipid	Sphingomyelins	sphingomyelin (d18:2/24:2)*	0.8	1.3	1.18	0.96	0.344904	0.0203258
Turquoise	Nucleotide	Purine Metabolism, Guanine containing	guanine	0.59	1.2	0.77	0.55	0.322656	0.0306397
Turquoise	Lipid	Lysophospholipid	1-palmitoyl-GPC (16:0)	1.04	1.03	1.05	1	0.321614	0.0312137
Turquoise	Lipid	Phosphatidylcholine (PC)	1-palmitoleoyl-2-linolenoyl-GPC (16:1/18:3)*	0.95	0.88	1.53	1.03	0.319891	0.0321814
Turquoise	Lipid	Plasmalogen	1-(1-enyl-stearoyl)-2-arachidonoyl-GPE (P-18:0/20:4)*	0.97	1.34	1.09	1	0.315965	0.0344797
Turquoise	Lipid	Phosphatidylinositol (PI)	1-oleoyl-2-arachidonoyl-GPI (18:1/20:4)*	0.8	1.8	1.66	1.06	0.3105	0.0379027
Turquoise	Lipid	Sterol	cholesterol	0.78	1.26	1.82	1	0.306041	0.0408982
Turquoise	Lipid	Dihydrosphingomyelins	palmitoyl dihydrosphingomyelin (d18:0/16:0)*	0.93	1.18	1.14	0.96	0.304655	0.0418681
Turquoise	Lipid	Sphingosines	sphingosine	0.66	1.14	1.11	1	0.300731	0.0447149
Turquoise	Amino Acid	Tyrosine Metabolism	thyroxine	0.94	1.12	1.12	1.05	0.298462	0.0464315
Turquoise	SUPER PATHWAY	SUB-PATHWAY	BIOCHEMICAL	SubB/SubA Cellulose	SubB/SubA Inulin	SubB/SubA Pectin	SubB/SubA Assorted	MS Liver TG	p.MS Liver TG
Turquoise	Lipid	Phosphatidylinositol (PI)	1-stearoyl-2-arachidonoyl-GPI (18:0/20:4)	0.91	0.96	1	0.87	0.564288	5.41e-05
Turquoise	Cofactors and Vitamins	Tocopherol Metabolism	alpha-tocopherol	0.93	0.85	1.04	0.95	0.535384	0.00015092
Turquoise	Lipid	Lysophospholipid	1-arachidonoyl-GPE (20:4n6)*	0.91	0.95	0.99	0.88	0.506515	0.00038487
Turquoise	Lipid	Lysophospholipid	1-arachidonoyl-GPC (20:4n6)*	0.79	0.97	1.32	0.86	0.503217	0.00042609
Turquoise	Lipid	Sterol	campesterol	0.62	0.56	3.41	0.82	0.490535	0.00062417
Turquoise	Nucleotide	Purine Metabolism, (Hypo)Xanthine/Inosine containing	inosine	0.75	0.89	1.11	0.92	0.482955	0.00077874
Turquoise	Lipid	Phosphatidylcholine (PC)	1-oleoyl-2-docosahexaenoyl-GPC (18:1/22:6)*	0.78	0.99	1.36	0.93	0.479787	0.00085291
Turquoise	Lipid	Phosphatidylcholine (PC)	1-palmitoyl-2-dihomo-linolenoyl-GPC (16:0/20:3n3 or 6)*	0.89	0.87	1.34	0.92	0.477268	0.00091633
Turquoise	Lipid	Lysophospholipid	1-arachidonoyl-GPI* (20:4)*	0.87	0.9	1.26	0.89	0.472972	0.00103425
Turquoise	Cofactors and Vitamins	Ascorbate and Aldarate Metabolism	ascorbic acid 3-sulfate*	0.91	0.79	1.07	0.96	0.462296	0.00138792
Turquoise	Lipid	Sphingomyelins	sphingomyelin (d18:1/22:2, d18:2/22:1, d16:1/24:2)*	0.78	0.97	1.69	0.86	0.459585	0.00149334
Turquoise	Lipid	Phosphatidylcholine (PC)	1-stearoyl-2-docosahexaenoyl-GPC (18:0/22:6)	0.92	0.96	1.14	0.92	0.445569	0.00215999
Turquoise	Lipid	Fatty Acid Synthesis	malonylcarnitine	0.92	1.01	1	0.86	0.44418	0.00223861
Turquoise	Lipid	Phosphatidylcholine (PC)	1-linoleoyl-2-arachidonoyl-GPC (18:2/20:4n6)*	0.8	0.9	1.46	0.89	0.443174	0.00229709
Turquoise	Lipid	Hexosylceramides (HCER)	glycosyl-N-stearoyl-sphingosine (d18:1/18:0)	0.59	1.14	1.25	0.74	0.442116	0.00236002
Turquoise	Lipid	Sphingomyelins	sphingomyelin (d18:1/20:1, d18:2/20:0)*	0.8	1.02	1.39	0.82	0.440611	0.00245223
Turquoise	Lipid	Lysophospholipid	1-palmitoleoyl-GPC* (16:1)*	0.96	0.84	1.31	0.93	0.438756	0.0025702
Turquoise	Lipid	Sphingomyelins	sphingomyelin (d18:2/21:0, d16:2/23:0)*	0.77	0.83	1.48	0.78	0.438634	0.00257815
Turquoise	Lipid	Sphingomyelins	sphingomyelin (d18:2/14:0, d18:1/14:1)*	0.79	0.94	1.73	0.79	0.436089	0.00274866
Turquoise	Nucleotide	Purine Metabolism, Guanine containing	guanine	0.59	1.2	0.77	0.55	0.434758	0.0028417
Turquoise	Lipid	Phosphatidylcholine (PC)	1-palmitoyl-2-docosahexaenoyl-GPC (16:0/22:6)	0.9	1.03	1.21	0.95	0.432713	0.00299009
Turquoise	Lipid	Lysophospholipid	1-oleoyl-GPC (18:1)	0.95	1.73	0.68	0.87	0.432076	0.00303767
Turquoise	Lipid	Sphingomyelins	sphingomyelin (d18:2/18:1)*	0.87	0.93	1.3	0.91	0.429582	0.00323052
Turquoise	Lipid	Hexosylceramides (HCER)	glycosyl ceramide (d18:1/20:0, d16:1/22:0)*	0.75	0.97	1.4	0.71	0.428494	0.00331795
Turquoise	Lipid	Sphingomyelins	sphingomyelin (d17:1/16:0, d18:1/15:0, d16:1/17:0)*	0.82	0.98	1.01	0.81	0.422707	0.00381875
Turquoise	Lipid	Sphingomyelins	sphingomyelin (d18:1/14:0, d16:1/16:0)*	0.86	0.96	1.46	0.89	0.418587	0.00421448
Turquoise	Lipid	Lysophospholipid	2-palmitoleoyl-GPC* (16:1)*	1.01	0.68	1.2	0.9	0.418462	0.00422704
Turquoise	Lipid	Phosphatidylcholine (PC)	1-stearoyl-2-arachidonoyl-GPC (18:0/20:4)	0.8	1.02	1.24	0.88	0.412847	0.00482551
Turquoise	Lipid	Sphingomyelins	sphingomyelin (d18:1/19:0, d19:1/18:0)*	0.7	1.05	1.2	0.79	0.404255	0.00588436
Turquoise	Lipid	Hexosylceramides (HCER)	glycosyl ceramide (d16:1/24:1, d18:1/22:1)*	0.79	0.73	1.63	0.47	0.396117	0.00706797
Turquoise	Lipid	Sphingomyelins	sphingomyelin (d18:1/18:1, d18:2/18:0)	0.87	1.01	1.12	0.92	0.382062	0.00960029
Turquoise	Lipid	Phosphatidylcholine (PC)	1-myristoyl-2-arachidonoyl-GPC (14:0/20:4)*	0.78	0.91	1.64	0.89	0.381159	0.00978676
Turquoise	Lipid	Phosphatidylcholine (PC)	1-palmitoyl-2-arachidonoyl-GPC (16:0/20:4n6)	0.86	1.01	1.26	0.94	0.37746	0.0105836
Turquoise	Lipid	Lysophospholipid	1-stearoyl-GPC (18:0)	1.02	0.97	1.18	0.9	0.373953	0.0113895
Turquoise	Lipid	Ceramides	ceramide (d18:2/24:1, d18:1/24:2)*	0.79	1.09	1.42	1.02	0.372502	0.0117382
Turquoise	Lipid	Sphingomyelins	sphingomyelin (d18:2/16:0, d18:1/16:1)*	0.87	0.94	1.31	0.91	0.357285	0.015978
Turquoise	Lipid	Sphingomyelins	sphingomyelin (d18:2/23:1)*	0.76	1.1	1.2	0.97	0.354551	0.0168633
Turquoise	Cofactors and Vitamins	Vitamin A Metabolism	retinol (Vitamin A)	0.88	0.87	1.06	0.89	0.352213	0.0176529
Turquoise	Lipid	Endocannabinoid	stearoyl ethanolamide	1.04	0.78	1.3	0.88	0.35128	0.0179765
Turquoise	Lipid	Sphingomyelins	sphingomyelin (d18:1/17:0, d17:1/18:0, d19:1/16:0)	0.75	1.16	0.95	0.79	0.350966	0.0180865
Turquoise	Xenobiotics	Chemical	perfluorooctanesulfonate (PFOS)	0.93	1.03	0.88	0.73	0.347286	0.0194196
Turquoise	Energy	TCA Cycle	succinylcarnitine (C4-DC)	0.78	1.03	0.98	1.02	0.341658	0.0216177
Turquoise	Lipid	Phosphatidylinositol (PI)	1-oleoyl-2-arachidonoyl-GPI (18:1/20:4)*	0.8	1.8	1.66	1.06	0.340047	0.0222841
Turquoise	Lipid	Lysophospholipid	2-palmitoyl-GPC* (16:0)*	1.07	0.96	0.98	0.95	0.337531	0.0233589
Turquoise	Lipid	Phosphatidylinositol (PI)	1-palmitoyl-2-arachidonoyl-GPI (16:0/20:4)*	1.1	0.9	0.98	0.89	0.334309	0.0247992
Turquoise	Lipid	Hexosylceramides (HCER)	glycosyl-N-palmitoyl-sphingosine (d18:1/16:0)	0.88	1	1.1	0.93	0.328938	0.0273636
Turquoise	Cofactors and Vitamins	Ascorbate and Aldarate Metabolism	ascorbic acid 2-sulfate	0.83	0.8	1.12	0.89	0.326319	0.0286925
Turquoise	Lipid	Sphingomyelins	sphingomyelin (d18:1/22:1, d18:2/22:0, d16:1/24:1)*	0.95	0.92	1.61	0.93	0.325585	0.0290739
Turquoise	Lipid	Sphingomyelins	sphingomyelin (d18:1/20:0, d16:1/22:0)*	0.86	1.01	1.39	0.91	0.319828	0.0322173
Turquoise	Lipid	Hexosylceramides (HCER)	glycosyl-N-behenoyl-sphingadienine (d18:2/22:0)*	1.03	0.73	1.36	0.68	0.319143	0.0326092
Turquoise	Lipid	Sphingomyelins	sphingomyelin (d18:2/23:0, d18:1/23:1, d17:1/24:1)*	0.85	0.94	1.23	0.96	0.294811	0.0493061
Turquoise	SUPER PATHWAY	SUB-PATHWAY	BIOCHEMICAL	SubB/SubA Cellulose	SubB/SubA Inulin	SubB/SubA Pectin	SubB/SubA Assorted F	MS Glucose	p.MS Glucose
Turquoise	Cofactors and Vitamins	Tocopherol Metabolism	alpha-tocopherol	0.93	0.85	1.04	0.95	0.678872	2.96271e-07
Turquoise	Lipid	Dihydrosphingomyelins	behenoyl dihydrosphingomyelin (d18:0/22:0)*	0.97	0.86	1.56	0.98	0.585867	2.35636e-05
Turquoise	Lipid	Phosphatidylcholine (PC)	1-stearoyl-2-docosahexaenoyl-GPC (18:0/22:6)	0.92	0.96	1.14	0.92	0.549526	9.2425e-05
Turquoise	Lipid	Lysophospholipid	1-stearoyl-GPC (18:0)	1.02	0.97	1.18	0.9	0.54945	9.26748e-05
Turquoise	Lipid	Sphingomyelins	sphingomyelin (d18:2/14:0, d18:1/14:1)*	0.79	0.94	1.73	0.79	0.541445	0.000122643
Turquoise	Lipid	Sphingomyelins	sphingomyelin (d18:2/18:1)*	0.87	0.93	1.3	0.91	0.541019	0.000124459
Turquoise	Cofactors and Vitamins	Ascorbate and Aldarate Metabolism	ascorbic acid 3-sulfate*	0.91	0.79	1.07	0.96	0.539329	0.000131916
Turquoise	Lipid	Sphingomyelins	sphingomyelin (d18:2/16:0, d18:1/16:1)*	0.87	0.94	1.31	0.91	0.537345	0.000141182
Turquoise	Lipid	Phosphatidylcholine (PC)	1-palmitoyl-2-docosahexaenoyl-GPC (16:0/22:6)	0.9	1.03	1.21	0.95	0.53132	0.000173069
Turquoise	Lipid	Phosphatidylcholine (PC)	1-palmitoyl-2-dihomo-linolenoyl-GPC (16:0/20:3n3 or 6)*	0.89	0.87	1.34	0.92	0.518079	0.000267183
Turquoise	Lipid	Sphingomyelins	sphingomyelin (d18:1/22:1, d18:2/22:0, d16:1/24:1)*	0.95	0.92	1.61	0.93	0.512321	0.000320957
Turquoise	Lipid	Phosphatidylcholine (PC)	1-stearoyl-2-oleoyl-GPC (18:0/18:1)	0.99	0.94	1.22	0.95	0.507395	0.000374497
Turquoise	Lipid	Hexosylceramides (HCER)	glycosyl ceramide (d18:1/20:0, d16:1/22:0)*	0.75	0.97	1.4	0.71	0.49655	0.000521755
Turquoise	Lipid	Fatty Acid Synthesis	malonylcarnitine	0.92	1.01	1	0.86	0.496245	0.000526561
Turquoise	Lipid	Sphingomyelins	sphingomyelin (d18:1/14:0, d16:1/16:0)*	0.86	0.96	1.46	0.89	0.490489	0.000625029
Turquoise	Lipid	Sphingomyelins	sphingomyelin (d18:1/20:0, d16:1/22:0)*	0.86	1.01	1.39	0.91	0.474226	0.000998491
Turquoise	Energy	TCA Cycle	succinylcarnitine (C4-DC)	0.78	1.03	0.98	1.02	0.461452	0.00141999
Turquoise	Lipid	Sterol	campesterol	0.62	0.56	3.41	0.82	0.459844	0.00148296
Turquoise	Lipid	Sphingomyelins	sphingomyelin (d18:1/18:1, d18:2/18:0)	0.87	1.01	1.12	0.92	0.457331	0.00158631
Turquoise	Lipid	Phosphatidylinositol (PI)	1-stearoyl-2-arachidonoyl-GPI (18:0/20:4)	0.91	0.96	1	0.87	0.454834	0.0016953
Turquoise	Lipid	Sphingomyelins	sphingomyelin (d18:1/21:0, d17:1/22:0, d16:1/23:0)*	1.03	0.89	1.27	0.92	0.453738	0.0017452
Turquoise	Lipid	Phosphatidylcholine (PC)	1-palmitoyl-2-stearoyl-GPC (16:0/18:0)	0.89	1.17	1.4	0.94	0.448221	0.00201665
Turquoise	Lipid	Sphingomyelins	sphingomyelin (d18:1/19:0, d19:1/18:0)*	0.7	1.05	1.2	0.79	0.444929	0.00219589
Turquoise	Lipid	Sphingomyelins	sphingomyelin (d18:1/20:1, d18:2/20:0)*	0.8	1.02	1.39	0.82	0.442385	0.00234388
Turquoise	Lipid	Sphingomyelins	palmitoyl sphingomyelin (d18:1/16:0)	0.93	1	1.14	0.94	0.440044	0.00248778
Turquoise	Lipid	Sphingomyelins	sphingomyelin (d18:2/21:0, d16:2/23:0)*	0.77	0.83	1.48	0.78	0.437359	0.00266241
Turquoise	Lipid	Phosphatidylcholine (PC)	1-oleoyl-2-docosahexaenoyl-GPC (18:1/22:6)*	0.78	0.99	1.36	0.93	0.436187	0.00274189
Turquoise	Lipid	Sphingomyelins	sphingomyelin (d18:1/22:2, d18:2/22:1, d16:1/24:2)*	0.78	0.97	1.69	0.86	0.434878	0.00283324
Turquoise	Lipid	Phosphatidylcholine (PC)	1-linoleoyl-2-arachidonoyl-GPC (18:2/20:4n6)*	0.8	0.9	1.46	0.89	0.433121	0.00295993
Turquoise	Lipid	Phosphatidylcholine (PC)	1-palmitoyl-2-arachidonoyl-GPC (16:0/20:4n6)	0.86	1.01	1.26	0.94	0.432394	0.00301382
Turquoise	Lipid	Hexosylceramides (HCER)	glycosyl-N-behenoyl-sphingadienine (d18:2/22:0)*	1.03	0.73	1.36	0.68	0.426337	0.00349742
Turquoise	Lipid	Phosphatidylcholine (PC)	1-myristoyl-2-arachidonoyl-GPC (14:0/20:4)*	0.78	0.91	1.64	0.89	0.426026	0.00352394
Turquoise	Lipid	Phosphatidylcholine (PC)	1-palmitoyl-2-oleoyl-GPC (16:0/18:1)	0.96	0.93	1.25	1	0.4214	0.00394063
Turquoise	Lipid	Sphingomyelins	tricosanoyl sphingomyelin (d18:1/23:0)*	0.86	0.91	1.23	1.03	0.420116	0.00406359
Turquoise	Lipid	Phosphatidylcholine (PC)	1-stearoyl-2-arachidonoyl-GPC (18:0/20:4)	0.8	1.02	1.24	0.88	0.41144	0.00498659
Turquoise	Lipid	Sphingomyelins	sphingomyelin (d18:2/23:0, d18:1/23:1, d17:1/24:1)*	0.85	0.94	1.23	0.96	0.406591	0.00557818
Turquoise	Lipid	Endocannabinoid	stearoyl ethanolamide	1.04	0.78	1.3	0.88	0.401694	0.0062368
Turquoise	Lipid	Sphingomyelins	sphingomyelin (d17:1/16:0, d18:1/15:0, d16:1/17:0)*	0.82	0.98	1.01	0.81	0.398947	0.00663486
Turquoise	Lipid	Hexosylceramides (HCER)	glycosyl-N-palmitoyl-sphingosine (d18:1/16:0)	0.88	1	1.1	0.93	0.39652	0.0070049
Turquoise	Lipid	Hexosylceramides (HCER)	glycosyl-N-stearoyl-sphingosine (d18:1/18:0)	0.59	1.14	1.25	0.74	0.395192	0.00721475
Turquoise	Lipid	Hexosylceramides (HCER)	glycosyl ceramide (d16:1/24:1, d18:1/22:1)*	0.79	0.73	1.63	0.47	0.392999	0.00757325
Turquoise	Lipid	Lysophospholipid	1-lignoceroyl-GPC (24:0)	0.96	1.2	1.22	0.97	0.386224	0.00877973
Turquoise	Lipid	Sphingomyelins	sphingomyelin (d18:2/23:1)*	0.76	1.1	1.2	0.97	0.379998	0.010031
Turquoise	Lipid	Ceramides	ceramide (d18:2/24:1, d18:1/24:2)*	0.79	1.09	1.42	1.02	0.375856	0.010946
Turquoise	Amino Acid	Urea cycle; Arginine and Proline Metabolism	N,N,N-trimethyl-alanylproline betaine (TMAP)	0.88	1.11	1.16	1.19	0.369692	0.0124393
Turquoise	Cofactors and Vitamins	Vitamin A Metabolism	retinol (Vitamin A)	0.88	0.87	1.06	0.89	0.36276	0.0143233
Turquoise	Lipid	Lysophospholipid	1-palmitoleoyl-GPC* (16:1)*	0.96	0.84	1.31	0.93	0.357846	0.0158013
Turquoise	Lipid	Lysophospholipid	1-palmitoyl-GPC (16:0)	1.04	1.03	1.05	1	0.356539	0.0162154
Turquoise	Lipid	Sterol	cholesterol	0.78	1.26	1.82	1	0.354908	0.0167453
Turquoise	Cofactors and Vitamins	Ascorbate and Aldarate Metabolism	ascorbic acid 2-sulfate	0.83	0.8	1.12	0.89	0.354851	0.016764
Turquoise	Lipid	Phosphatidylcholine (PC)	1-stearoyl-2-linoleoyl-GPC (18:0/18:2)*	1.01	1.13	1.07	0.99	0.350033	0.018417
Turquoise	Nucleotide	Purine Metabolism, (Hypo)Xanthine/Inosine containing	inosine	0.75	0.89	1.11	0.92	0.350016	0.0184229
Turquoise	Lipid	Phosphatidylcholine (PC)	1-palmitoleoyl-2-linoleoyl-GPC (16:1/18:2)*	0.91	0.91	1.42	1.03	0.348841	0.0188464
Turquoise	Xenobiotics	Chemical	perfluorooctanesulfonate (PFOS)	0.93	1.03	0.88	0.73	0.343733	0.0207841
Turquoise	Lipid	Phosphatidylcholine (PC)	1-palmitoyl-2-palmitoleoyl-GPC (16:0/16:1)*	0.87	0.82	1.61	0.9	0.342257	0.021374
Turquoise	Lipid	Sphingomyelins	behenoyl sphingomyelin (d18:1/22:0)*	1.15	0.99	1.43	1.04	0.339764	0.0224028
Turquoise	Lipid	Phosphatidylinositol (PI)	1-palmitoyl-2-arachidonoyl-GPI (16:0/20:4)*	1.1	0.9	0.98	0.89	0.339686	0.0224355
Turquoise	Lipid	Sphingomyelins	sphingomyelin (d18:2/24:1, d18:1/24:2)*	0.82	1.18	1.36	1.02	0.334849	0.0245525
Turquoise	Lipid	Hexosylceramides (HCER)	glycosyl ceramide (d18:2/24:1, d18:1/24:2)*	0.89	1.11	1.03	0.98	0.321517	0.0312675
Turquoise	Lipid	Lysophospholipid	2-palmitoyl-GPC* (16:0)*	1.07	0.96	0.98	0.95	0.316784	0.0339897
Turquoise	Xenobiotics	Food Component/Plant	kojibiose	1.04	1.39	0.48	0.45	0.313703	0.0358646
Turquoise	Lipid	Ceramides	N-palmitoyl-sphingosine (d18:1/16:0)	0.91	1.17	1.03	0.88	0.306086	0.0408674
Turquoise	Lipid	Lysophospholipid	1-oleoyl-GPC (18:1)	0.95	1.73	0.68	0.87	0.30556	0.0412325
Turquoise	Energy	Oxidative Phosphorylation	phosphate	1.07	0.86	1.41	1.33	0.304232	0.0421671
Turquoise	Lipid	Lysophospholipid	1-arachidonoyl-GPC (20:4n6)*	0.79	0.97	1.32	0.86	0.298832	0.0461475
Module	SUPER PATHWAY	SUB-PATHWAY	BIOCHEMICAL	SubB/SubA Cellulose	SubB/SubA Inulin	SubB/SubA Pectin	SubB/SubA Assorted	MS FM%	p.MS FM%
Blue	Xenobiotics	Benzoate Metabolism	catechol sulfate	0.95	5.35	0.46	4.07	-0.592328	1.82e-05
Blue	Peptide	Gamma-glutamyl Amino Acid	gamma-glutamylphenylalanine	1.03	1.39	0.81	1.27	-0.591243	1.9e-05
Blue	Amino Acid	Phenylalanine Metabolism	phenylalanine	1.02	1.11	1.05	1.08	-0.588883	2.09e-05
Blue	Amino Acid	Urea cycle; Arginine and Proline Metabolism	trans-4-hydroxyproline	0.98	1.33	0.86	1.13	-0.587337	2.22e-05
Blue	Amino Acid	Glutamate Metabolism	alpha-ketoglutaramate*	0.99	1.2	0.84	1.17	-0.58198	2.75e-05
Blue	Amino Acid	Leucine, Isoleucine and Valine Metabolism	isovalerylcarnitine (C5)	0.91	1.69	0.76	1.21	-0.577411	3.29e-05
Blue	Amino Acid	Urea cycle; Arginine and Proline Metabolism	homocitrulline	1.04	1.56	0.65	1.24	-0.54959	9.22e-05
Blue	Amino Acid	Methionine, Cysteine, SAM and Taurine Metabolism	cystathionine	0.99	1.52	0.92	1.35	-0.529452	0.0001842
Blue	Amino Acid	Glycine, Serine and Threonine Metabolism	N-acetylthreonine	1.04	1.29	0.83	1.11	-0.52659	0.00020252
Blue	Peptide	Gamma-glutamyl Amino Acid	gamma-glutamylmethionine	1.03	1.72	1.03	1.59	-0.525729	0.00020835
Blue	Amino Acid	Glycine, Serine and Threonine Metabolism	N-acetylserine	0.98	1.15	0.77	1.13	-0.523815	0.00022185
Blue	Amino Acid	Lysine Metabolism	lysine	1.05	1.35	0.82	1.16	-0.523495	0.00022419
Blue	Amino Acid	Methionine, Cysteine, SAM and Taurine Metabolism	methionine	1.07	1.48	0.9	1.08	-0.523123	0.00022692
Blue	Amino Acid	Urea cycle; Arginine and Proline Metabolism	N-alpha-acetylornithine	1.17	2.02	1.33	1.9	-0.520827	0.00024451
Blue	Xenobiotics	Food Component/Plant	tartarate	1.99	4.13	0.21	2.66	-0.509966	0.00034562
Blue	Amino Acid	Methionine, Cysteine, SAM and Taurine Metabolism	N-acetylmethionine	1.04	1.6	0.84	1.23	-0.508159	0.0003657
Blue	Amino Acid	Urea cycle; Arginine and Proline Metabolism	N-delta-acetylornithine	1.02	6.22	0.86	0.83	-0.504565	0.00040878
Blue	Amino Acid	Leucine, Isoleucine and Valine Metabolism	N-acetylvaline	1.12	1.39	0.83	1.14	-0.498201	0.00049642
Blue	Amino Acid	Glutamate Metabolism	4-hydroxyglutamate	1.05	1.41	0.84	1.32	-0.493346	0.00057426
Blue	Amino Acid	Leucine, Isoleucine and Valine Metabolism	valine	1.06	1.45	0.98	1.14	-0.489228	0.00064868
Blue	Peptide	Gamma-glutamyl Amino Acid	gamma-glutamylhistidine	0.99	1.33	0.89	1.32	-0.48846	0.00066347
Blue	Amino Acid	Lysine Metabolism	N6-acetyllysine	1.01	1.25	0.73	1.08	-0.486827	0.00069595
Blue	Amino Acid	Urea cycle; Arginine and Proline Metabolism	proline	0.99	1.93	0.75	1.1	-0.483352	0.00076986
Blue	Peptide	Gamma-glutamyl Amino Acid	gamma-glutamyl-alpha-lysine	1.09	1.54	0.68	1.53	-0.481084	0.00082181
Blue	Amino Acid	Glutamate Metabolism	N-acetyl-aspartyl-glutamate (NAAG)	0.99	1.08	0.97	1.24	-0.480243	0.00084185
Blue	Peptide	Gamma-glutamyl Amino Acid	gamma-glutamylvaline	1.01	1.42	0.83	1.22	-0.478225	0.00089176
Blue	Peptide	Gamma-glutamyl Amino Acid	gamma-glutamylserine	0.98	1.54	0.91	1.15	-0.475279	0.00096934
Blue	Lipid	Fatty Acid, Dicarboxylate	2-hydroxyadipate	1.06	2.57	0.51	1.56	-0.472906	0.00103614
Blue	Amino Acid	Histidine Metabolism	hydantoin-5-propionate	1.35	2.45	0.51	1.78	-0.467053	0.00121885
Blue	Amino Acid	Leucine, Isoleucine and Valine Metabolism	3-methylglutaconate	0.93	1.37	0.79	1.2	-0.458831	0.00152387
Blue	Peptide	Gamma-glutamyl Amino Acid	gamma-glutamyltyrosine	0.99	1.95	0.65	1.1	-0.457598	0.00157502
Blue	Lipid	Fatty Acid Metabolism (Acyl Carnitine, Hydroxy/Medium Chain/Short Chain)	acetylcarnitine (C2)	0.97	1.08	0.94	1.1	-0.457521	0.00157828
Blue	Amino Acid	Leucine, Isoleucine and Valine Metabolism	N-acetylleucine	1.1	1.89	0.69	1.37	-0.451249	0.00186336
Blue	Lipid	Fatty Acid Metabolism (also BCAA Metabolism)	propionylcarnitine (C3)	1.04	1.32	0.78	0.96	-0.449459	0.00195269
Blue	Amino Acid	Methionine, Cysteine, SAM and Taurine Metabolism	S-adenosylhomocysteine (SAH)	1.1	1.19	0.81	1.14	-0.443696	0.00226658
Blue	Peptide	Gamma-glutamyl Amino Acid	gamma-glutamyltryptophan	0.72	1.54	1.18	1.35	-0.443143	0.00229888
Blue	Amino Acid	Leucine, Isoleucine and Valine Metabolism	2-methylbutyrylcarnitine (C5)	0.89	0.92	0.78	1	-0.442196	0.00235522
Blue	Peptide	Gamma-glutamyl Amino Acid	gamma-glutamylglutamine	0.81	1.06	0.94	1.21	-0.435096	0.00281783
Blue	Amino Acid	Methionine, Cysteine, SAM and Taurine Metabolism	methionine sulfoxide	1.01	1.94	0.74	1.12	-0.433613	0.00292394
Blue	Amino Acid	Glutamate Metabolism	2-pyrrolidinone	0.96	1.75	1.24	0.9	-0.430962	0.00312254
Blue	Amino Acid	Tyrosine Metabolism	tyrosine	1.01	1.54	0.86	1.04	-0.423612	0.00373625
Blue	Amino Acid	Alanine and Aspartate Metabolism	N-acetylasparagine	0.99	1.44	0.76	1.08	-0.420739	0.00400357
Blue	Amino Acid	Urea cycle; Arginine and Proline Metabolism	N2,N5-diacetylornithine	0.77	3.42	1.17	0.93	-0.413532	0.00474882
Blue	Carbohydrate	Aminosugar Metabolism	N-acetylglucosaminylasparagine	1.05	1.2	0.89	1.3	-0.412457	0.00486969
Blue	Amino Acid	Leucine, Isoleucine and Valine Metabolism	tiglylcarnitine (C5:1-DC)	0.78	1.37	0.68	0.97	-0.411885	0.00493522
Blue	Xenobiotics	Drug - Topical Agents	2,6-dihydroxybenzoic acid	1.36	3.75	0.33	2.1	-0.411324	0.00500014
Blue	Lipid	Fatty Acid, Dicarboxylate	glutarate (C5-DC)	1.54	1.54	1.08	2.06	-0.407981	0.00540271
Blue	Peptide	Gamma-glutamyl Amino Acid	gamma-glutamylalanine	1.02	1.74	0.77	1.19	-0.39779	0.00680917
Blue	Amino Acid	Phenylalanine Metabolism	N-acetylphenylalanine	0.91	1.32	0.96	1.11	-0.397468	0.00685834
Blue	Peptide	Gamma-glutamyl Amino Acid	gamma-glutamylleucine	1	1.63	0.77	1.35	-0.39574	0.00712744
Blue	Amino Acid	Histidine Metabolism	N-acetylhistidine	0.99	1.6	0.71	1.26	-0.390071	0.00807583
Blue	Amino Acid	Tyrosine Metabolism	N-acetyltyrosine	0.89	2.17	0.86	0.96	-0.386615	0.00870586
Blue	Peptide	Gamma-glutamyl Amino Acid	gamma-glutamylcitrulline*	0.98	1.16	1.02	1.36	-0.378673	0.0103163
Blue	Amino Acid	Lysine Metabolism	6-oxopiperidine-2-carboxylate	1.06	1.83	0.81	1.37	-0.37816	0.0104287
Blue	Peptide	Dipeptide	prolylglycine	1.04	1.34	1.31	1.4	-0.372621	0.0117093
Blue	Amino Acid	Lysine Metabolism	2-oxoadipate	1.04	3.09	0.51	1.32	-0.366082	0.0133922
Blue	Amino Acid	Leucine, Isoleucine and Valine Metabolism	leucine	1.02	1.25	1.01	1.18	-0.365853	0.0134544
Blue	Amino Acid	Histidine Metabolism	3-methylhistidine	0.92	1.49	1	1.25	-0.365517	0.0135468
Blue	Carbohydrate	Pentose Metabolism	arabitol/xylitol	0.95	1.17	0.77	1.06	-0.355674	0.0164946
Blue	Amino Acid	Tryptophan Metabolism	kynurenate	0.99	0.88	0.86	1.63	-0.354305	0.0169448
Blue	Amino Acid	Urea cycle; Arginine and Proline Metabolism	homoarginine	1.2	1.2	0.68	1.36	-0.349183	0.0187225
Blue	Amino Acid	Leucine, Isoleucine and Valine Metabolism	3-hydroxyisobutyrate	1.1	1.1	0.62	1.22	-0.342729	0.021184
Blue	Amino Acid	Histidine Metabolism	histidine	1.03	1.2	0.97	1.08	-0.340719	0.0220039
Blue	Carbohydrate	Disaccharides and Oligosaccharides	sucrose	1.08	2.74	0.25	1.97	-0.333753	0.0250546
Blue	Amino Acid	Urea cycle; Arginine and Proline Metabolism	N-acetylhomocitrulline	0.85	1.33	0.52	0.99	-0.328318	0.0276734
Blue	Amino Acid	Leucine, Isoleucine and Valine Metabolism	alpha-hydroxyisocaproate	0.94	1.36	0.98	1.26	-0.328114	0.027776
Blue	Peptide	Gamma-glutamyl Amino Acid	gamma-glutamylglycine	0.91	1.18	1.01	1.26	-0.324041	0.0298907
Blue	Xenobiotics	Food Component/Plant	3-indoleglyoxylic acid	0.9	1.87	0.75	1.37	-0.32105	0.0315278
Blue	Peptide	Gamma-glutamyl Amino Acid	gamma-glutamylthreonine	1	1.55	0.75	1.24	-0.317968	0.0332909
Blue	Amino Acid	Lysine Metabolism	2-aminoadipate	1.13	1.9	0.66	1.25	-0.317454	0.0335929
Blue	Lipid	Fatty Acid Metabolism (also BCAA Metabolism)	methylmalonate (MMA)	0.95	0.99	0.7	0.9	-0.315842	0.0345542
Blue	Peptide	Gamma-glutamyl Amino Acid	gamma-glutamylisoleucine*	0.94	1.5	0.88	1.3	-0.311259	0.0374116
Blue	Peptide	Dipeptide	phenylalanylhydroxyproline*	0.97	1.1	0.82	1.37	-0.311011	0.0375713
Blue	Amino Acid	Glutamate Metabolism	N-acetylglutamate	0.93	1.32	0.69	1.2	-0.303025	0.0430319
Blue	Amino Acid	Lysine Metabolism	hydroxy-N6,N6,N6-trimethyllysine*	0.87	1.01	1.07	1.31	-0.296698	0.0478027
Blue	Peptide	Gamma-glutamyl Amino Acid	gamma-glutamylglutamate	0.76	1.15	1.17	1.38	-0.295967	0.0483802
Blue	Amino Acid	Histidine Metabolism	carnosine	0.94	1.04	1	1.24	-0.294462	0.049588
Blue	SUPER PATHWAY	SUB-PATHWAY	BIOCHEMICAL	SubB/SubA Cellulose	SubB/SubA Inulin	SubB/SubA Pectin	SubB/SubA Assorted	MS Liver TG	p.MS Liver TG
Blue	Peptide	Gamma-glutamyl Amino Acid	gamma-glutamylphenylalanine	1.03	1.39	0.81	1.27	-0.550782	8.84e-05
Blue	Xenobiotics	Benzoate Metabolism	catechol sulfate	0.95	5.35	0.46	4.07	-0.547173	0.00010044
Blue	Amino Acid	Phenylalanine Metabolism	phenylalanine	1.02	1.11	1.05	1.08	-0.531131	0.00017417
Blue	Amino Acid	Leucine, Isoleucine and Valine Metabolism	isovalerylcarnitine (C5)	0.91	1.69	0.76	1.21	-0.527782	0.0001947
Blue	Amino Acid	Methionine, Cysteine, SAM and Taurine Metabolism	methionine	1.07	1.48	0.9	1.08	-0.515143	0.00029349
Blue	Amino Acid	Glutamate Metabolism	4-hydroxyglutamate	1.05	1.41	0.84	1.32	-0.510865	0.00033601
Blue	Peptide	Gamma-glutamyl Amino Acid	gamma-glutamylhistidine	0.99	1.33	0.89	1.32	-0.470697	0.001102
Blue	Peptide	Gamma-glutamyl Amino Acid	gamma-glutamylleucine	1	1.63	0.77	1.35	-0.466026	0.00125373
Blue	Amino Acid	Urea cycle; Arginine and Proline Metabolism	N-delta-acetylornithine	1.02	6.22	0.86	0.83	-0.463604	0.00133945
Blue	Amino Acid	Urea cycle; Arginine and Proline Metabolism	homocitrulline	1.04	1.56	0.65	1.24	-0.460676	0.00145009
Blue	Peptide	Gamma-glutamyl Amino Acid	gamma-glutamylvaline	1.01	1.42	0.83	1.22	-0.458273	0.00154685
Blue	Amino Acid	Glutamate Metabolism	alpha-ketoglutaramate*	0.99	1.2	0.84	1.17	-0.457186	0.00159245
Blue	Amino Acid	Urea cycle; Arginine and Proline Metabolism	N-alpha-acetylornithine	1.17	2.02	1.33	1.9	-0.454934	0.0016908
Blue	Amino Acid	Methionine, Cysteine, SAM and Taurine Metabolism	cystathionine	0.99	1.52	0.92	1.35	-0.451319	0.00185998
Blue	Amino Acid	Leucine, Isoleucine and Valine Metabolism	valine	1.06	1.45	0.98	1.14	-0.44049	0.00245977
Blue	Amino Acid	Lysine Metabolism	lysine	1.05	1.35	0.82	1.16	-0.43498	0.00282597
Blue	Peptide	Gamma-glutamyl Amino Acid	gamma-glutamyl-alpha-lysine	1.09	1.54	0.68	1.53	-0.433775	0.00291219
Blue	Amino Acid	Leucine, Isoleucine and Valine Metabolism	N-acetylvaline	1.12	1.39	0.83	1.14	-0.422604	0.0038282
Blue	Peptide	Gamma-glutamyl Amino Acid	gamma-glutamylmethionine	1.03	1.72	1.03	1.59	-0.422015	0.00388285
Blue	Amino Acid	Urea cycle; Arginine and Proline Metabolism	N2,N5-diacetylornithine	0.77	3.42	1.17	0.93	-0.420821	0.00399565
Blue	Peptide	Gamma-glutamyl Amino Acid	gamma-glutamyltyrosine	0.99	1.95	0.65	1.1	-0.418355	0.00423778
Blue	Amino Acid	Urea cycle; Arginine and Proline Metabolism	trans-4-hydroxyproline	0.98	1.33	0.86	1.13	-0.413286	0.00477621
Blue	Amino Acid	Histidine Metabolism	3-methylhistidine	0.92	1.49	1	1.25	-0.400397	0.00642214
Blue	Peptide	Dipeptide	prolylglycine	1.04	1.34	1.31	1.4	-0.399702	0.00652338
Blue	Xenobiotics	Chemical	O-sulfo-L-tyrosine	1.16	1.15	0.75	1.1	-0.397624	0.0068344
Blue	Amino Acid	Leucine, Isoleucine and Valine Metabolism	leucine	1.02	1.25	1.01	1.18	-0.392786	0.0076089
Blue	Peptide	Gamma-glutamyl Amino Acid	gamma-glutamylserine	0.98	1.54	0.91	1.15	-0.387319	0.00857418
Blue	Amino Acid	Tyrosine Metabolism	tyrosine	1.01	1.54	0.86	1.04	-0.386253	0.00877431
Blue	Peptide	Gamma-glutamyl Amino Acid	gamma-glutamylisoleucine*	0.94	1.5	0.88	1.3	-0.385242	0.00896762
Blue	Amino Acid	Histidine Metabolism	hydantoin-5-propionate	1.35	2.45	0.51	1.78	-0.377157	0.0106512
Blue	Amino Acid	Methionine, Cysteine, SAM and Taurine Metabolism	methionine sulfoxide	1.01	1.94	0.74	1.12	-0.376999	0.0106865
Blue	Amino Acid	Alanine and Aspartate Metabolism	N-acetylasparagine	0.99	1.44	0.76	1.08	-0.366948	0.0131581
Blue	Amino Acid	Methionine, Cysteine, SAM and Taurine Metabolism	N-acetylmethionine	1.04	1.6	0.84	1.23	-0.363321	0.0141622
Blue	Amino Acid	Histidine Metabolism	N-acetylhistidine	0.99	1.6	0.71	1.26	-0.359508	0.0152874
Blue	Amino Acid	Leucine, Isoleucine and Valine Metabolism	3-methylglutaconate	0.93	1.37	0.79	1.2	-0.359245	0.015368
Blue	Amino Acid	Glycine, Serine and Threonine Metabolism	N-acetylthreonine	1.04	1.29	0.83	1.11	-0.358927	0.0154656
Blue	Peptide	Gamma-glutamyl Amino Acid	gamma-glutamylglutamine	0.81	1.06	0.94	1.21	-0.352426	0.0175796
Blue	Carbohydrate	Aminosugar Metabolism	N-acetylglucosaminylasparagine	1.05	1.2	0.89	1.3	-0.351327	0.0179602
Blue	Amino Acid	Lysine Metabolism	pipecolate	0.88	1.21	1.07	1.3	-0.350384	0.018292
Blue	Amino Acid	Urea cycle; Arginine and Proline Metabolism	proline	0.99	1.93	0.75	1.1	-0.343507	0.0208737
Blue	Amino Acid	Glutamate Metabolism	2-pyrrolidinone	0.96	1.75	1.24	0.9	-0.339878	0.0223549
Blue	Lipid	Fatty Acid, Dicarboxylate	glutarate (C5-DC)	1.54	1.54	1.08	2.06	-0.337324	0.0234496
Blue	Amino Acid	Histidine Metabolism	histidine	1.03	1.2	0.97	1.08	-0.336321	0.0238913
Blue	Amino Acid	Leucine, Isoleucine and Valine Metabolism	N-acetylleucine	1.1	1.89	0.69	1.37	-0.336125	0.0239784
Blue	Amino Acid	Lysine Metabolism	5-(galactosylhydroxy)-L-lysine	0.88	1.22	1	1.29	-0.334625	0.0246545
Blue	Lipid	Fatty Acid Metabolism (Acyl Glycine)	picolinoylglycine	1.75	1.06	1.01	2.21	-0.332108	0.0258244
Blue	Amino Acid	Glycine, Serine and Threonine Metabolism	N-acetylserine	0.98	1.15	0.77	1.13	-0.330192	0.0267459
Blue	Xenobiotics	Benzoate Metabolism	hippurate	0.94	1.56	0.67	2.33	-0.329991	0.0268441
Blue	Amino Acid	Leucine, Isoleucine and Valine Metabolism	4-methyl-2-oxopentanoate	1.04	1.27	0.83	1.14	-0.326199	0.0287543
Blue	Amino Acid	Lysine Metabolism	N6-acetyllysine	1.01	1.25	0.73	1.08	-0.321124	0.031486
Blue	Peptide	Gamma-glutamyl Amino Acid	gamma-glutamylalanine	1.02	1.74	0.77	1.19	-0.317356	0.0336504
Blue	Peptide	Gamma-glutamyl Amino Acid	gamma-glutamyltryptophan	0.72	1.54	1.18	1.35	-0.314331	0.0354754
Blue	Amino Acid	Leucine, Isoleucine and Valine Metabolism	isoleucine	1.01	1.1	1.04	1.12	-0.310105	0.0381611
Blue	Xenobiotics	Food Component/Plant	tartarate	1.99	4.13	0.21	2.66	-0.309538	0.0385335
Blue	Amino Acid	Methionine, Cysteine, SAM and Taurine Metabolism	S-adenosylhomocysteine (SAH)	1.1	1.19	0.81	1.14	-0.303746	0.0425133
Blue	Amino Acid	Methionine, Cysteine, SAM and Taurine Metabolism	cysteine	1.04	0.98	0.88	1.09	-0.301306	0.044288
Blue	Lipid	Fatty Acid Metabolism (also BCAA Metabolism)	propionylcarnitine (C3)	1.04	1.32	0.78	0.96	-0.300031	0.0452388
Blue	Amino Acid	Lysine Metabolism	hydroxy-N6,N6,N6-trimethyllysine*	0.87	1.01	1.07	1.31	-0.297318	0.047317
Blue	Carbohydrate	Disaccharides and Oligosaccharides	sucrose	1.08	2.74	0.25	1.97	-0.2967	0.0478013
Blue	Amino Acid	Leucine, Isoleucine and Valine Metabolism	tiglylcarnitine (C5:1-DC)	0.78	1.37	0.68	0.97	-0.296383	0.048051
Blue	Lipid	Fatty Acid Metabolism (also BCAA Metabolism)	propionylglycine	1.01	0.88	0.89	1.23	-0.295817	0.0484999
Blue	SUPER PATHWAY	SUB-PATHWAY	BIOCHEMICAL	SubB/SubA Cellulose	SubB/SubA Inulin	SubB/SubA Pectin	SubB/SubA Assorted	MS Glucose	p.MS Glucose
Blue	Xenobiotics	Benzoate Metabolism	catechol sulfate	0.95	5.35	0.46	4.07	-0.503093	0.00042772
Blue	Peptide	Gamma-glutamyl Amino Acid	gamma-glutamylserine	0.98	1.54	0.91	1.15	-0.450661	0.00189229
Blue	Amino Acid	Urea cycle; Arginine and Proline Metabolism	N-delta-acetylornithine	1.02	6.22	0.86	0.83	-0.440494	0.00245952
Blue	Amino Acid	Histidine Metabolism	3-methylhistidine	0.92	1.49	1	1.25	-0.439118	0.00254685
Blue	Amino Acid	Methionine, Cysteine, SAM and Taurine Metabolism	methionine sulfoxide	1.01	1.94	0.74	1.12	-0.437543	0.00265009
Blue	Lipid	Fatty Acid, Dihydroxy	2S,3R-dihydroxybutyrate	0.75	1.12	0.78	1	-0.427907	0.0033659
Blue	Amino Acid	Urea cycle; Arginine and Proline Metabolism	N2,N5-diacetylornithine	0.77	3.42	1.17	0.93	-0.421885	0.00389502
Blue	Peptide	Gamma-glutamyl Amino Acid	gamma-glutamylphenylalanine	1.03	1.39	0.81	1.27	-0.415909	0.00449058
Blue	Amino Acid	Leucine, Isoleucine and Valine Metabolism	isovalerylcarnitine (C5)	0.91	1.69	0.76	1.21	-0.409669	0.00519602
Blue	Peptide	Gamma-glutamyl Amino Acid	gamma-glutamyltyrosine	0.99	1.95	0.65	1.1	-0.40172	0.00623315
Blue	Lipid	Fatty Acid, Dihydroxy	2R,3R-dihydroxybutyrate	0.94	1.22	0.73	1.1	-0.400854	0.00635619
Blue	Amino Acid	Methionine, Cysteine, SAM and Taurine Metabolism	methionine	1.07	1.48	0.9	1.08	-0.395119	0.00722648
Blue	Amino Acid	Tyrosine Metabolism	tyrosine	1.01	1.54	0.86	1.04	-0.376311	0.010842
Blue	Xenobiotics	Food Component/Plant	tartarate	1.99	4.13	0.21	2.66	-0.375375	0.0110567
Blue	Amino Acid	Methionine, Cysteine, SAM and Taurine Metabolism	cystathionine	0.99	1.52	0.92	1.35	-0.364766	0.0137545
Blue	Amino Acid	Lysine Metabolism	N6-acetyllysine	1.01	1.25	0.73	1.08	-0.363069	0.0142344
Blue	Xenobiotics	Chemical	dimethyl sulfone	0.52	1.61	0.78	1.07	-0.36104	0.0148267
Blue	Peptide	Gamma-glutamyl Amino Acid	gamma-glutamylvaline	1.01	1.42	0.83	1.22	-0.358259	0.0156724
Blue	Amino Acid	Glycine, Serine and Threonine Metabolism	N-acetylserine	0.98	1.15	0.77	1.13	-0.341321	0.0217556
Blue	Amino Acid	Urea cycle; Arginine and Proline Metabolism	homocitrulline	1.04	1.56	0.65	1.24	-0.335756	0.0241432
Blue	Carbohydrate	Disaccharides and Oligosaccharides	sucrose	1.08	2.74	0.25	1.97	-0.323527	0.0301673
Blue	Peptide	Gamma-glutamyl Amino Acid	gamma-glutamylhistidine	0.99	1.33	0.89	1.32	-0.32223	0.030873
Blue	Amino Acid	Tyrosine Metabolism	N-acetyltyrosine	0.89	2.17	0.86	0.96	-0.311644	0.037164
Blue	Xenobiotics	Drug - Topical Agents	2,6-dihydroxybenzoic acid	1.36	3.75	0.33	2.1	-0.310925	0.0376274
Blue	Amino Acid	Urea cycle; Arginine and Proline Metabolism	N-alpha-acetylornithine	1.17	2.02	1.33	1.9	-0.306062	0.0408836
Blue	Peptide	Gamma-glutamyl Amino Acid	gamma-glutamyltryptophan	0.72	1.54	1.18	1.35	-0.301954	0.0438106
Blue	Amino Acid	Urea cycle; Arginine and Proline Metabolism	proline	0.99	1.93	0.75	1.1	-0.300891	0.0445952
Blue	Peptide	Gamma-glutamyl Amino Acid	gamma-glutamylmethionine	1.03	1.72	1.03	1.59	-0.297567	0.0471227
Blue	Lipid	Fatty Acid Metabolism (also BCAA Metabolism)	propionylcarnitine (C3)	1.04	1.32	0.78	0.96	-0.296562	0.0479096
Blue	Peptide	Gamma-glutamyl Amino Acid	gamma-glutamyl-alpha-lysine	1.09	1.54	0.68	1.53	-0.296082	0.0482894
Blue	Amino Acid	Lysine Metabolism	pipecolate	0.88	1.21	1.07	1.3	-0.294689	0.0494039
Blue	Amino Acid	Glycine, Serine and Threonine Metabolism	N-acetylthreonine	1.04	1.29	0.83	1.11	-0.294102	0.0498803
Blue	Carbohydrate	Advanced Glycation End-product	N6-carboxymethyllysine	0.84	0.86	0.98	1.05	0.314591	0.0353154
Blue	Amino Acid	Methionine, Cysteine, SAM and Taurine Metabolism	2,3-dihydroxy-5-methylthio-4-pentenoate (DMTPA)*	1.12	1.05	0.98	1.12	0.315789	0.0345857
Blue	Cofactors and Vitamins	Ascorbate and Aldarate Metabolism	threonate	0.92	0.89	0.91	1.02	0.334077	0.0249056
Blue	Lipid	Fatty Acid Metabolism (Acyl Carnitine, Hydroxy/Medium Chain/Short Chain)	(S)-3-hydroxybutyrylcarnitine	0.92	0.98	0.83	1.15	0.362069	0.0145237
Blue	Cofactors and Vitamins	Thiamine Metabolism	thiamin (Vitamin B1)	1.05	0.99	0.82	1.11	0.41692	0.00438459
Blue	Nucleotide	Purine Metabolism, (Hypo)Xanthine/Inosine containing	xanthine	1.03	0.81	0.95	0.95	0.466936	0.00122277
Blue	Lipid	Fatty Acid Metabolism (Acyl Carnitine, Hydroxy/Medium Chain/Short Chain)	hexanoylcarnitine (C6)	0.77	0.69	0.84	1.06	0.506445	0.000385708
Blue	Energy	TCA Cycle	succinate	0.99	0.94	0.95	1	0.575104	3.59238e-05
